# Supplementary material for: Gibbosolide A, a highly functionalized 20-membered macrolide with a terminal cis-fused 2-methylhexahydro-2H-furo[3,2-b]pyran motif: insights into late-stage cyclization of marine macrolides
Source: Royal Society of Chemistry journal article supplement (doi:10.1039/d1qo01038g), 2021-01-01
Supplement: d1qo01038g1.pdf [file d1qo01038g1.pdf]

# Supporting Information

Copies of HR-ESIMS for **1** and **1s/r**; LR-ESIMS for **1A**, **1B**, **1As/r**, **1A's/r**, and **1Bs/r**; and 1D and 2D NMR spectra for **1**, **1s/r**, **1A**, **1B**, **1As/r**, **1A's/r**, and **1Bs/r**; and **Figure S1**.

## Table of Contents:

|                                                                                                                                          |         |
|------------------------------------------------------------------------------------------------------------------------------------------|---------|
| 1. HR-ESIMS for compound <b>1</b> .....                                                                                                  | S4-S5   |
| 2. <sup>1</sup> H (700 MHz) NMR spectrum of compound <b>1</b> in CD <sub>3</sub> OD.....                                                 | S6-S8   |
| 3. <sup>13</sup> C (175 MHz) NMR spectrum of compound <b>1</b> in CD <sub>3</sub> OD.....                                                | S9-S13  |
| 4. <sup>13</sup> C (175 MHz) spectrum of compound <b>1</b> in CD <sub>3</sub> OH .....                                                   | S14     |
| 5. Comparison of <sup>13</sup> C (175 MHz) NMR spectrum of compound <b>1</b> in CD <sub>3</sub> OH with that in CD <sub>3</sub> OD ..... | S15     |
| 6. DEPT135 (175 MHz) spectrum of compound <b>1</b> in CD <sub>3</sub> OD.....                                                            | S16-S20 |
| 7. <sup>1</sup> H- <sup>1</sup> H COSY (700 MHz) spectrum of compound <b>1</b> in CD <sub>3</sub> OD .....                               | S21-S24 |
| 8. HSQC (700 MHz) spectrum of compound <b>1</b> in CD <sub>3</sub> OD .....                                                              | S25-S28 |
| 9. HMBC (700 MHz) spectrum of compound <b>1</b> in CD <sub>3</sub> OD .....                                                              | S29-S35 |
| 10. NOESY (700 MHz) spectrum of compound <b>1</b> in CD <sub>3</sub> OD .....                                                            | S36-S41 |
| 11. 2D JRES (700 MHz) spectrum of compound <b>1</b> in CD <sub>3</sub> OD.....                                                           | S42-S44 |
| 12. HETLOC (700 MHz) spectrum of compound <b>1</b> in CD <sub>3</sub> OD.....                                                            | S45-S48 |
| 13. UV spectrum of compound <b>1</b> .....                                                                                               | S49     |
| 14. LR-ESIMS for fragment <b>1A</b> .....                                                                                                | S50-S51 |
| 15. <sup>1</sup> H (600 MHz) NMR spectrum of the fragment <b>1A</b> in CD <sub>3</sub> OD.....                                           | S52-S55 |
| 16. <sup>1</sup> H- <sup>1</sup> H COSY (600 MHz) spectrum of the fragment <b>1A</b> in CD <sub>3</sub> OD .....                         | S56-S59 |
| 17. LR-ESIMS for fragment <b>1B</b> .....                                                                                                | S60-S61 |
| 18. <sup>1</sup> H (600 MHz) NMR spectrum of the fragment <b>1B</b> in CD <sub>3</sub> OD.....                                           | S62-S65 |
| 19. <sup>1</sup> H- <sup>1</sup> H COSY (600 MHz) spectrum of the fragment <b>1B</b> in CD <sub>3</sub> OD .....                         | S66-S69 |
| 20. HR-ESIMS for compound <b>1s</b> .....                                                                                                | S70-S71 |
| 21. <sup>1</sup> H (400 MHz) NMR spectrum of compound <b>1s</b> in CDCl <sub>3</sub> .....                                               | S72-S74 |
| 22. <sup>1</sup> H- <sup>1</sup> H COSY (400 MHz) spectrum of compound <b>1s</b> in CDCl <sub>3</sub> .....                              | S75-S77 |

|                                                                                                                    |           |
|--------------------------------------------------------------------------------------------------------------------|-----------|
| 23. HR-ESIMS for compound <b>1r</b> .....                                                                          | S78-S79   |
| 24. <sup>1</sup> H (400 MHz) NMR spectrum of compound <b>1r</b> in CDCl <sub>3</sub> .....                         | S80-S82   |
| 25. <sup>1</sup> H- <sup>1</sup> H COSY (400 MHz) spectrum of compound <b>1r</b> in CDCl <sub>3</sub> .....        | S83-S86   |
| 26. LR-ESIMS for fragment <b>1As</b> .....                                                                         | S87       |
| 27. <sup>1</sup> H (700 MHz) NMR spectrum of the fragment <b>1As</b> in CD <sub>3</sub> OD .....                   | S88-S90   |
| 28. <sup>1</sup> H- <sup>1</sup> H COSY (700 MHz) spectrum of the fragment <b>1As</b> in CD <sub>3</sub> OD .....  | S91-S94   |
| 29. LR-ESIMS for fragment <b>1Ar</b> .....                                                                         | S95       |
| 30. <sup>1</sup> H (700 MHz) NMR spectrum of the fragment <b>1Ar</b> in CD <sub>3</sub> OD .....                   | S96-S99   |
| 31. <sup>1</sup> H- <sup>1</sup> H COSY (700 MHz) spectrum of the fragment <b>1Ar</b> in CD <sub>3</sub> OD .....  | S100-S103 |
| 32. LR-ESIMS for fragment <b>1A's</b> .....                                                                        | S104      |
| 33. <sup>1</sup> H (700 MHz) NMR spectrum of the fragment <b>1A's</b> in CD <sub>3</sub> OD .....                  | S105-S107 |
| 34. <sup>1</sup> H- <sup>1</sup> H COSY (700 MHz) spectrum of the fragment <b>1A's</b> in CD <sub>3</sub> OD ..... | S108-S111 |
| 35. LR-ESIMS for fragment <b>1A'r</b> .....                                                                        | S112      |
| 36. <sup>1</sup> H (700 MHz) NMR spectrum of the fragment <b>1A'r</b> in CD <sub>3</sub> OD .....                  | S113-S116 |
| 37. <sup>1</sup> H- <sup>1</sup> H COSY (700 MHz) spectrum of the fragment <b>1A'r</b> in CD <sub>3</sub> OD ..... | S117-S120 |
| 38. LR-ESIMS for fragment <b>1Bs</b> .....                                                                         | S121      |
| 39. <sup>1</sup> H (600 MHz) NMR spectrum of the fragment <b>1Bs</b> in CD <sub>3</sub> OD .....                   | S122-S124 |
| 40. <sup>1</sup> H- <sup>1</sup> H COSY (600 MHz) spectrum of the fragment <b>1Bs</b> in CD <sub>3</sub> OD .....  | S125-S128 |
| 41. LR-ESIMS for fragment <b>1Br</b> .....                                                                         | S129      |
| 42. <sup>1</sup> H (600 MHz) NMR spectrum of the fragment <b>1Br</b> in CD <sub>3</sub> OD .....                   | S130-S132 |
| 43. <sup>1</sup> H- <sup>1</sup> H COSY (600 MHz) spectrum of the fragment <b>1Br</b> in CD <sub>3</sub> OD .....  | S133-S136 |
| 44. Figure S1. Agonistic effects of chenodeoxycholic acid on hFXR in HepG2 cells .....                             | S137      |

# HR-ESIMS for compound 1

## Mass Spectrum SmartFormula Report

### Analysis Info

Analysis Name D:\Data\MS\data\201905\liwanshan\_2-37\_pos\_35\_01\_6636.d  
Method LC\_Direct Infusion\_pos\_70-500mz.m  
Sample Name liwanshan\_2-37\_pos  
Comment

Acquisition Date 5/14/2019 4:36:58 PM  
Operator SCSIO  
Instrument maXis 255552.00029

### Acquisition Parameter

|             |          |                      |          |                  |           |
|-------------|----------|----------------------|----------|------------------|-----------|
| Source Type | ESI      | Ion Polarity         | Positive | Set Nebulizer    | 0.4 Bar   |
| Focus       | Active   | Set Capillary        | 4500 V   | Set Dry Heater   | 180 °C    |
| Scan Begin  | 70 m/z   | Set End Plate Offset | -500 V   | Set Dry Gas      | 4.0 l/min |
| Scan End    | 1500 m/z | Set Charging Voltage | 0 V      | Set Divert Valve | Waste     |
|             |          | Set Corona           | 0 nA     | Set APCI Heater  | 0 °C      |

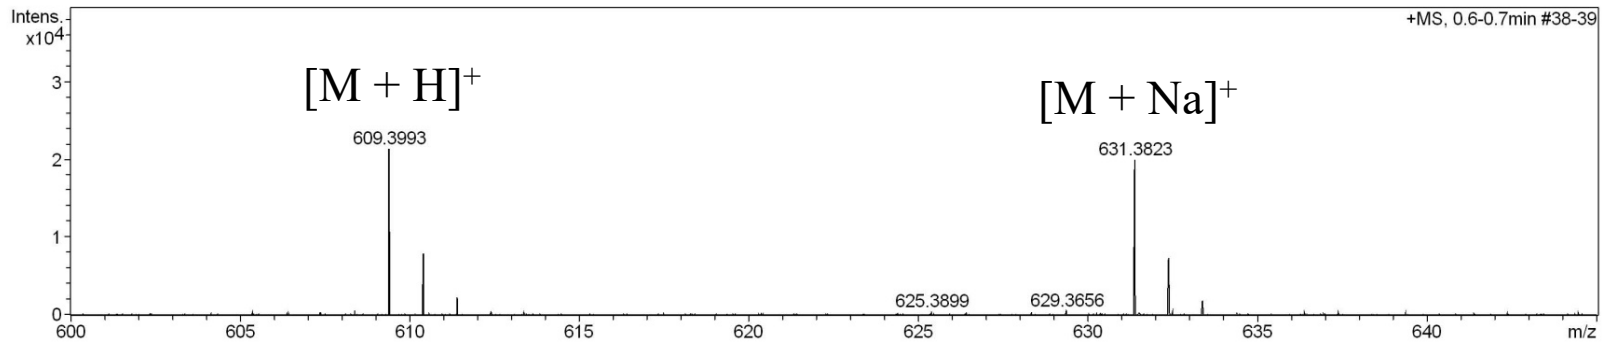

| Meas. m/z | # | Ion Formula | Score  | m/z      | err [ppm] | err [mDa] | mSigma | rdb | e <sup>-</sup> Conf | N-Rule |
|-----------|---|-------------|--------|----------|-----------|-----------|--------|-----|---------------------|--------|
| 609.3993  | 1 | C34H57O9    | 100.00 | 609.3997 | -0.6      | -0.4      | 9.0    | 6.5 | even                | ok     |
| 631.3823  | 1 | C34H56NaO9  | 100.00 | 631.3817 | 1.0       | 0.6       | 5.6    | 6.5 | even                | ok     |

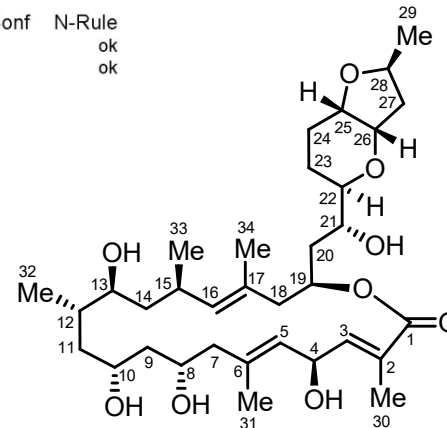

# HR-ESIMS for compound 1

## Generic Display Report

### Analysis Info

Analysis Name D:\Data\MS\data\201905\liwanshan\_2-37\_pos\_35\_01\_6636.d  
Method LC\_Direct Infusion\_pos\_70-500mz.m  
Sample Name liwanshan\_2-37\_pos  
Comment

Acquisition Date 5/14/2019 4:36:58 PM

Operator SCSIO  
Instrument maXis

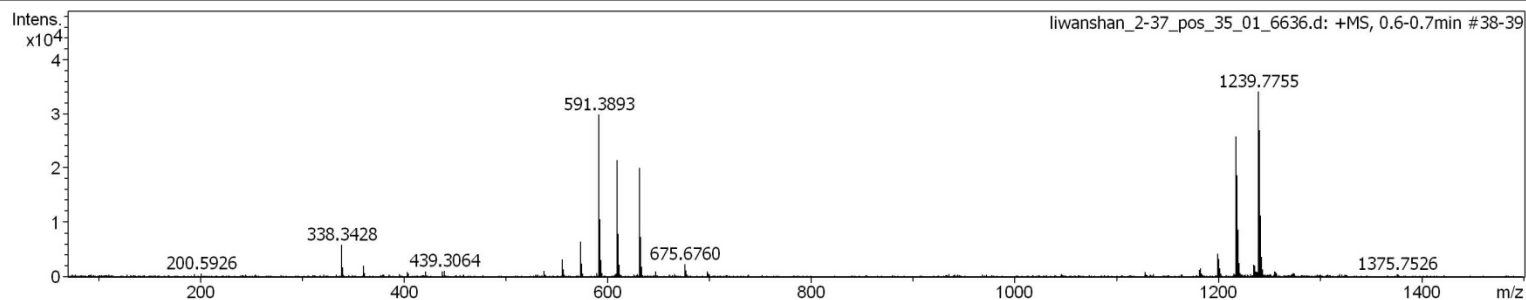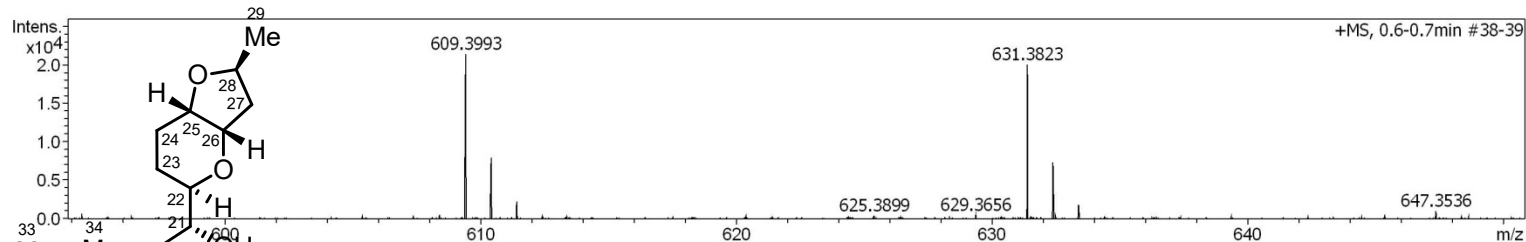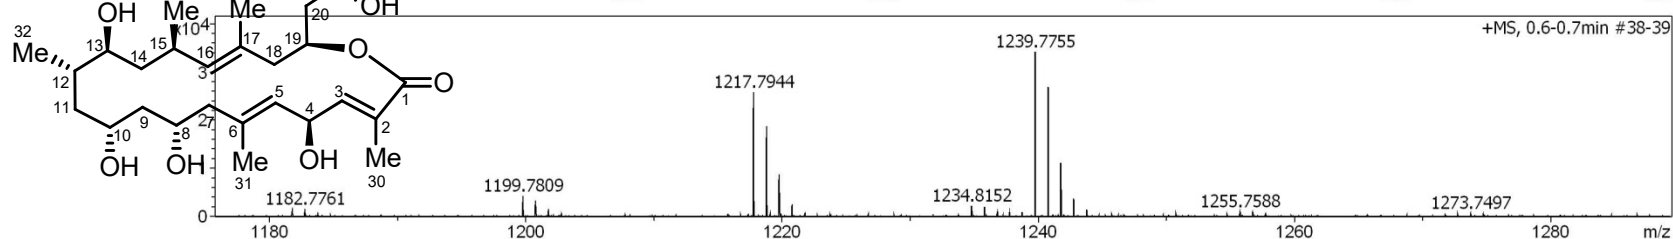

$^1\text{H}$  (700 MHz) NMR spectrum of compound **1** in  $\text{CD}_3\text{OD}$

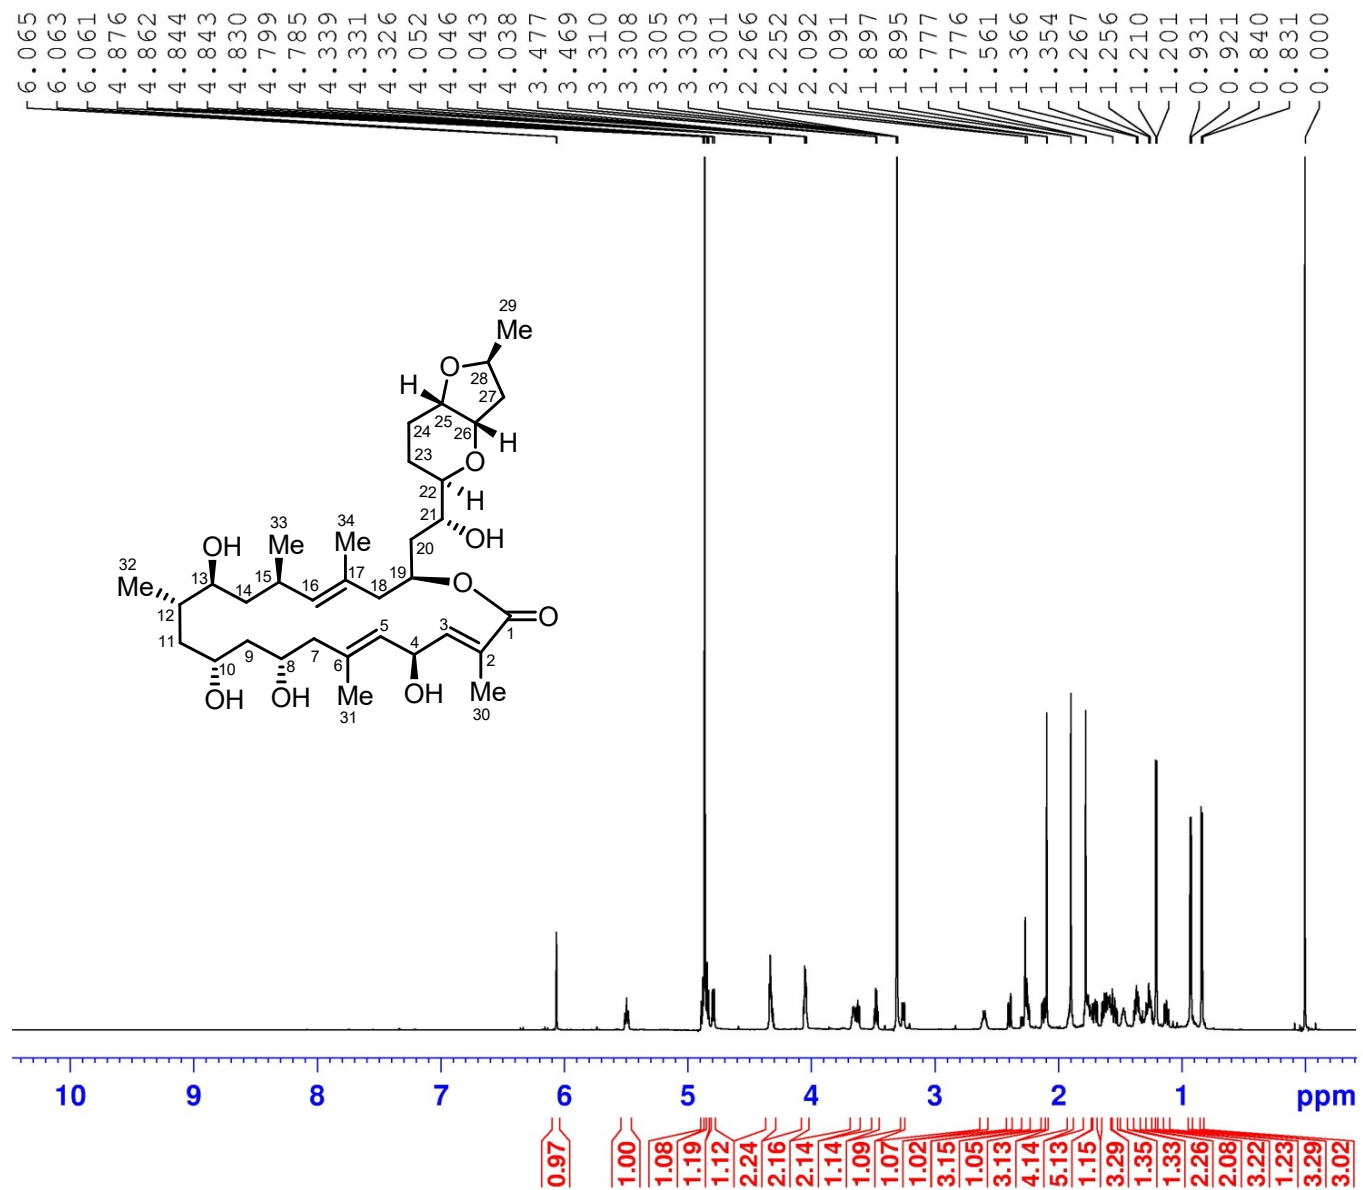

$^1\text{H}$  (700 MHz) NMR spectrum of compound **1** in  $\text{CD}_3\text{OD}$

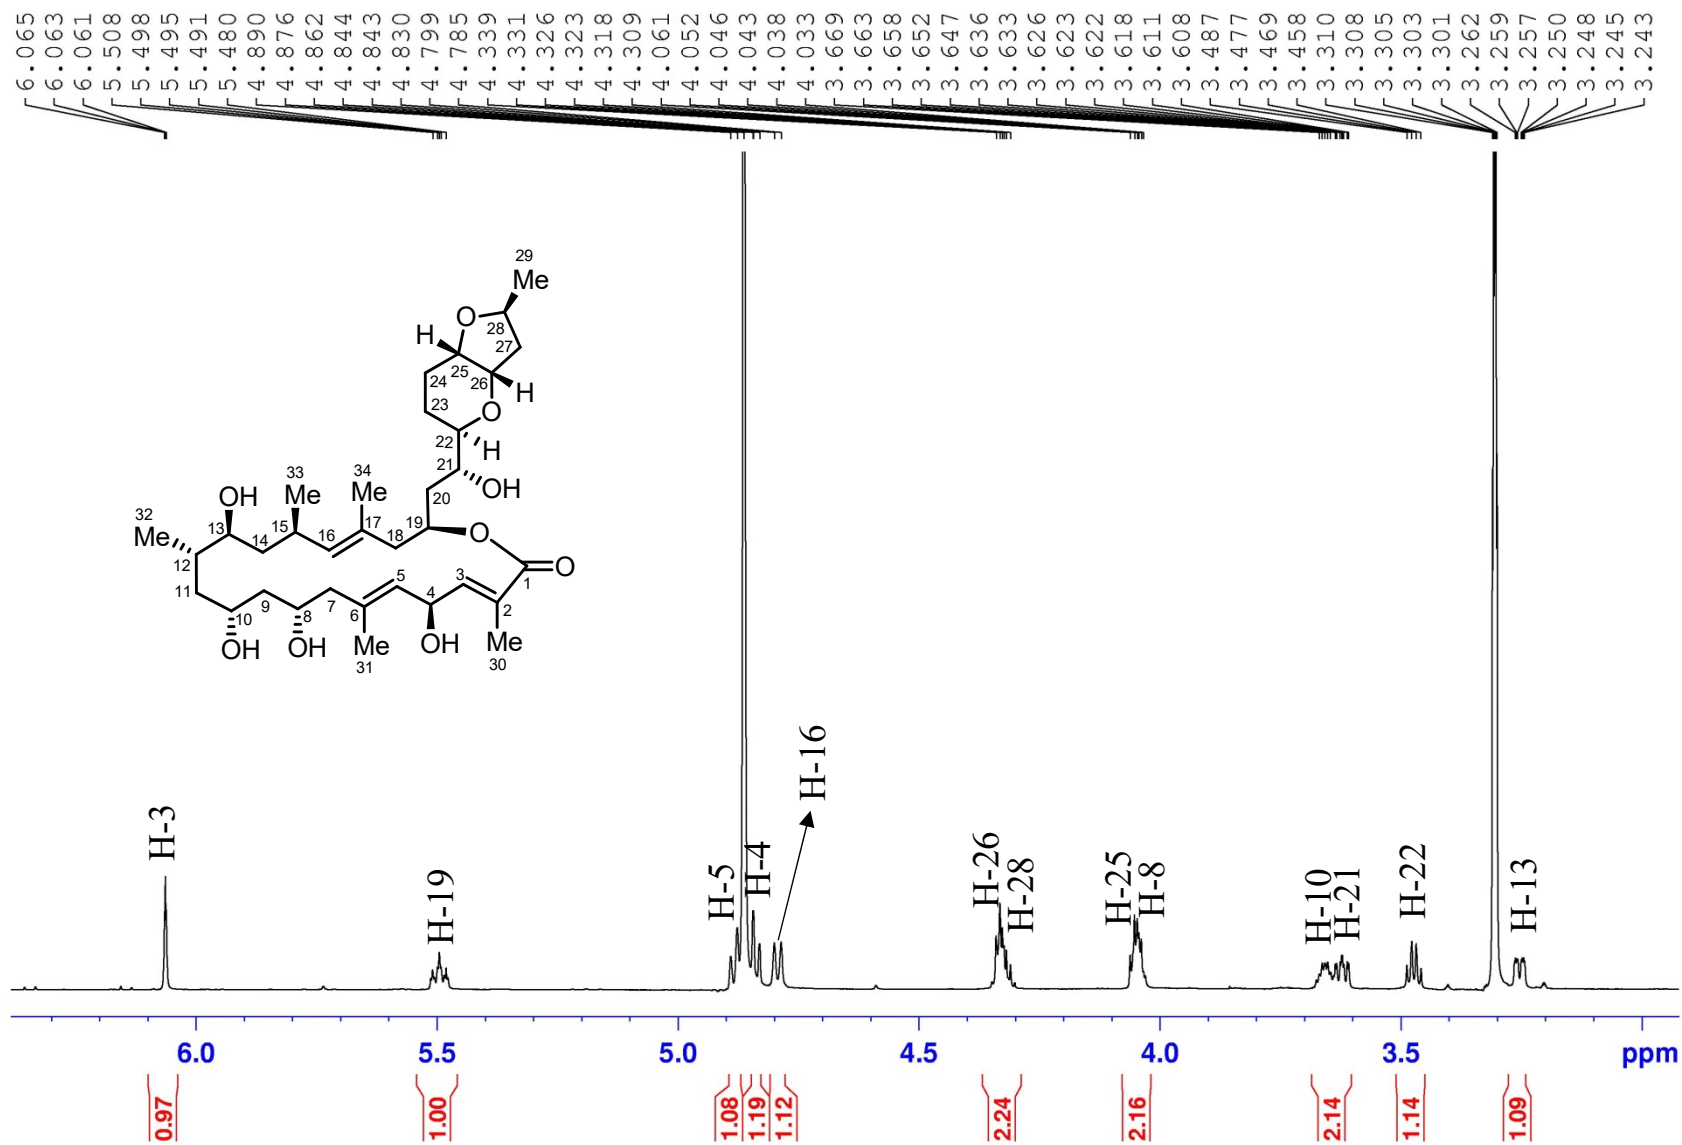

$^1\text{H}$  (700 MHz) NMR spectrum of compound **1** in  $\text{CD}_3\text{OD}$

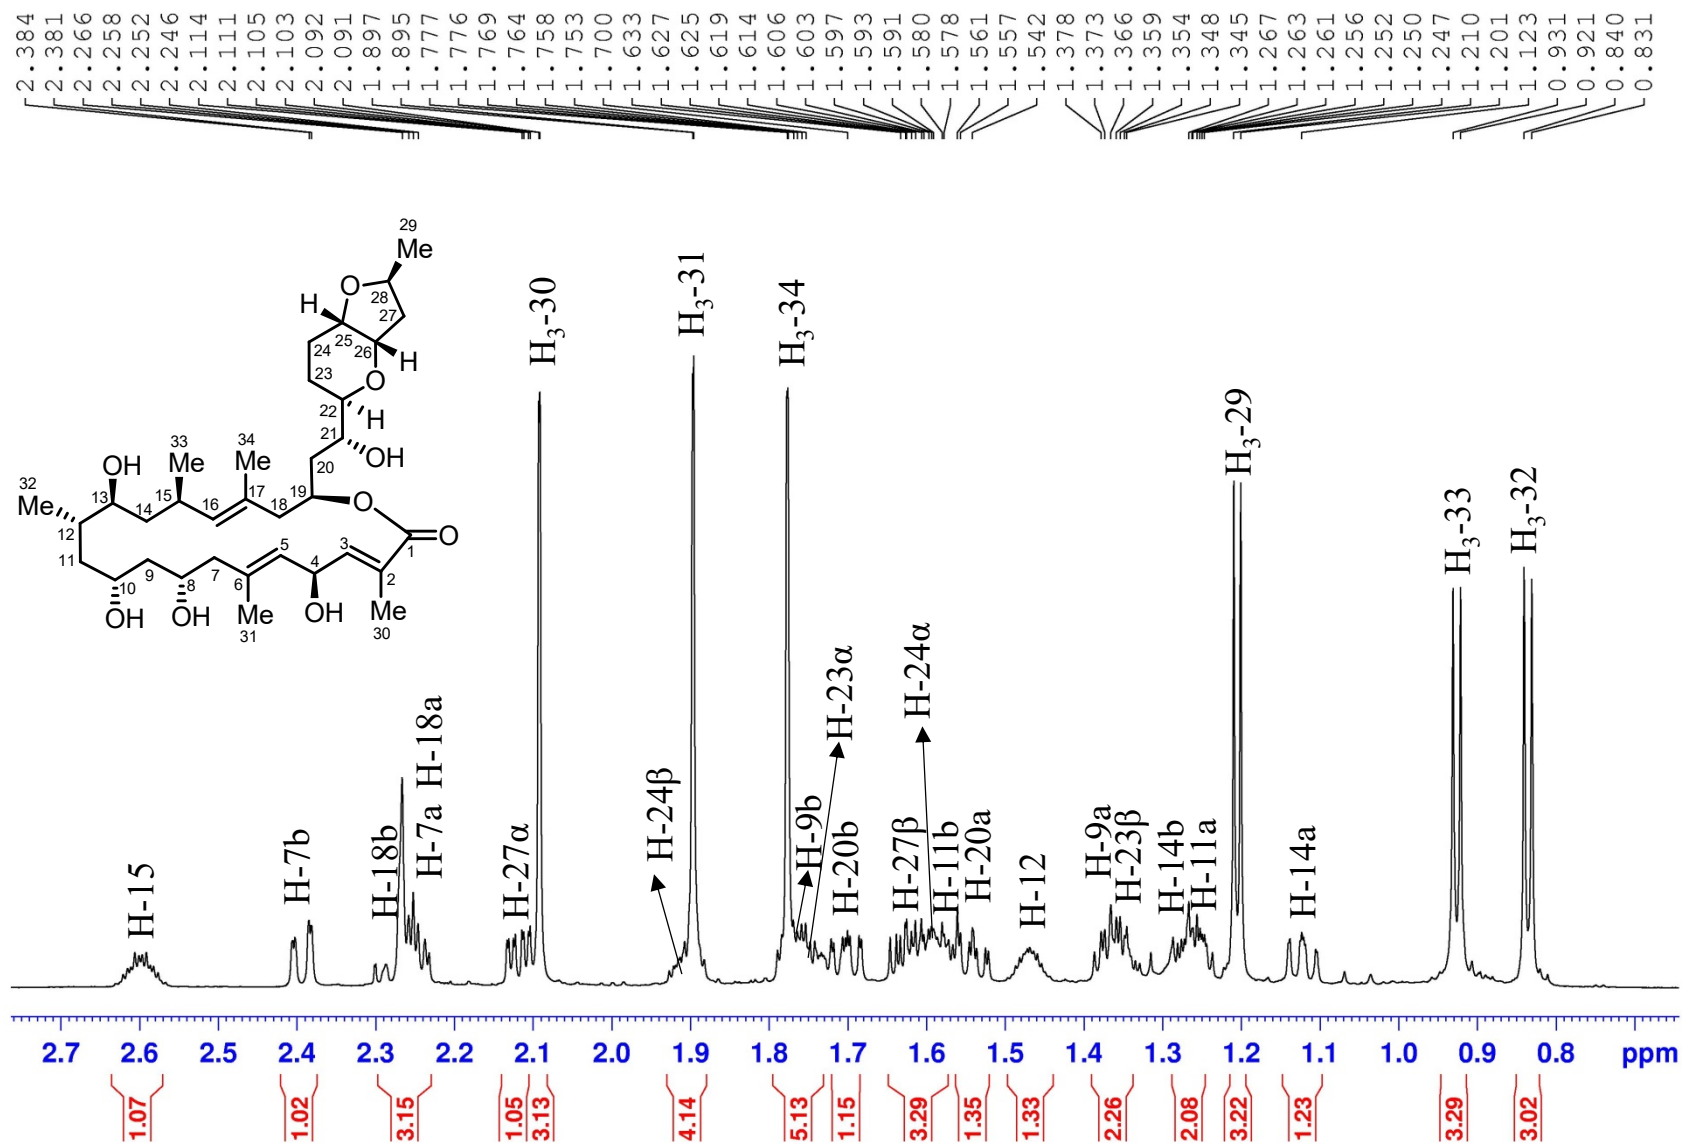



$^{13}\text{C}$  (175 MHz) NMR spectrum of compound **1** in  $\text{CD}_3\text{OD}$

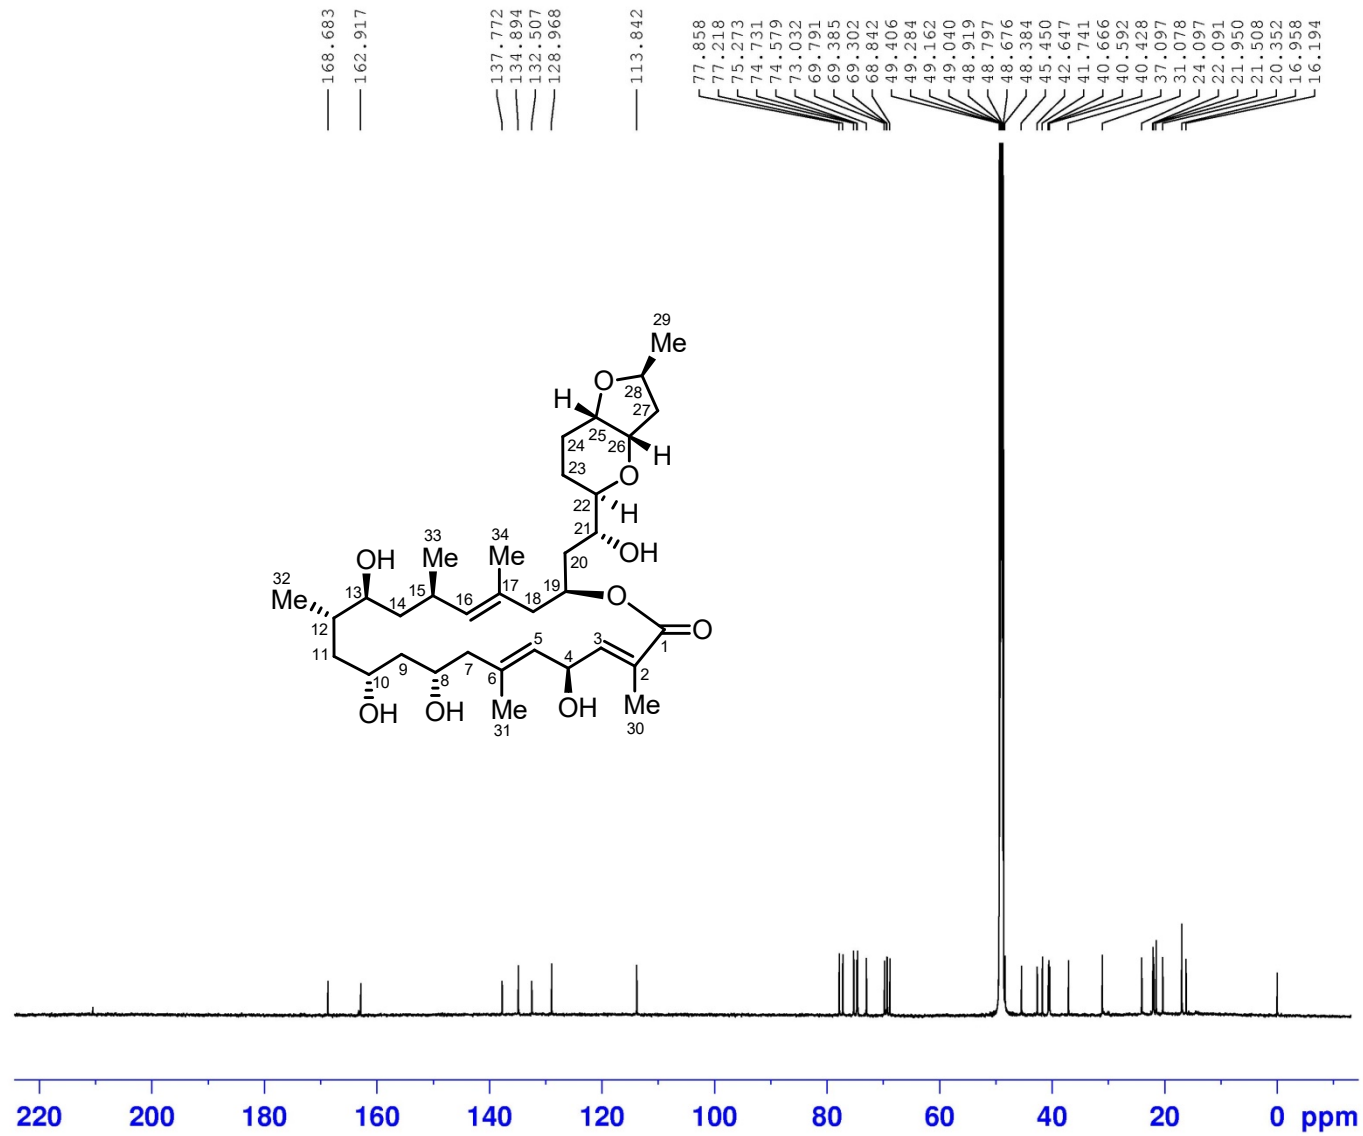

$^{13}\text{C}$  (175 MHz) NMR spectrum of compound **1** in  $\text{CD}_3\text{OD}$

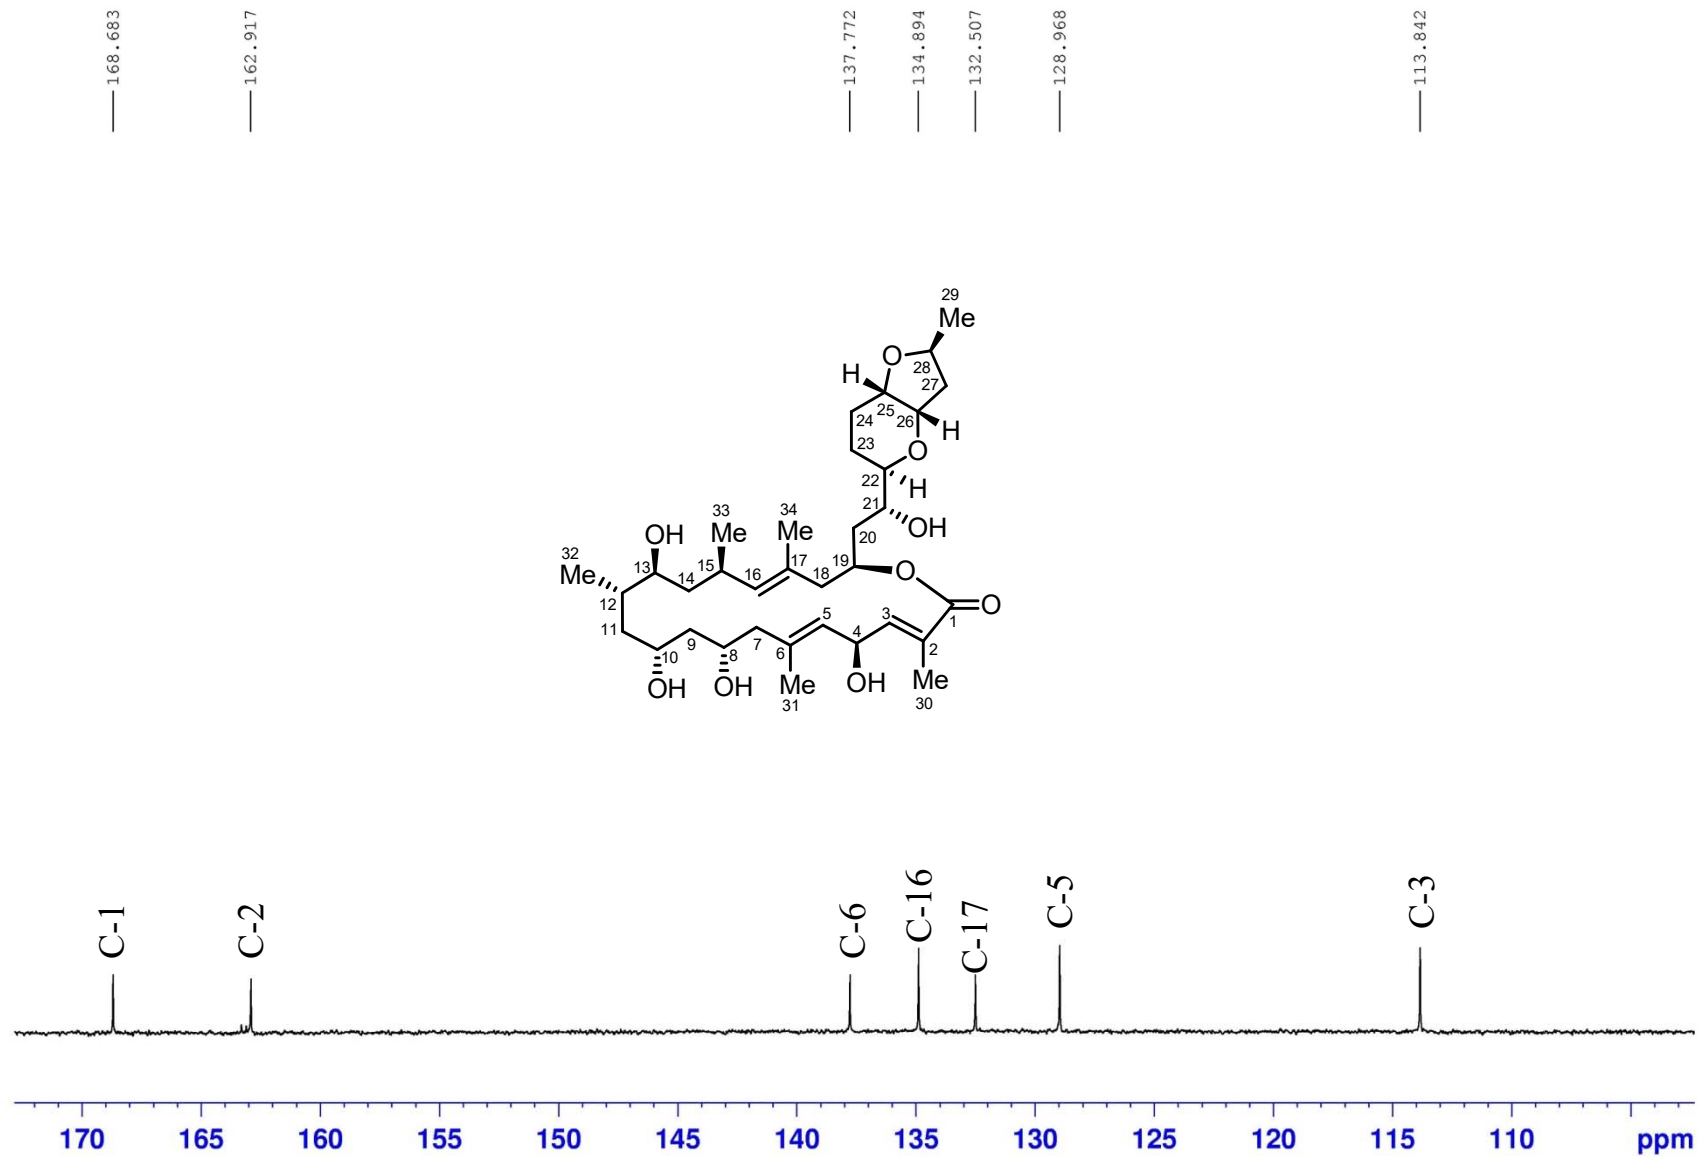

$^{13}\text{C}$  (175 MHz) NMR spectrum of compound **1** in  $\text{CD}_3\text{OD}$

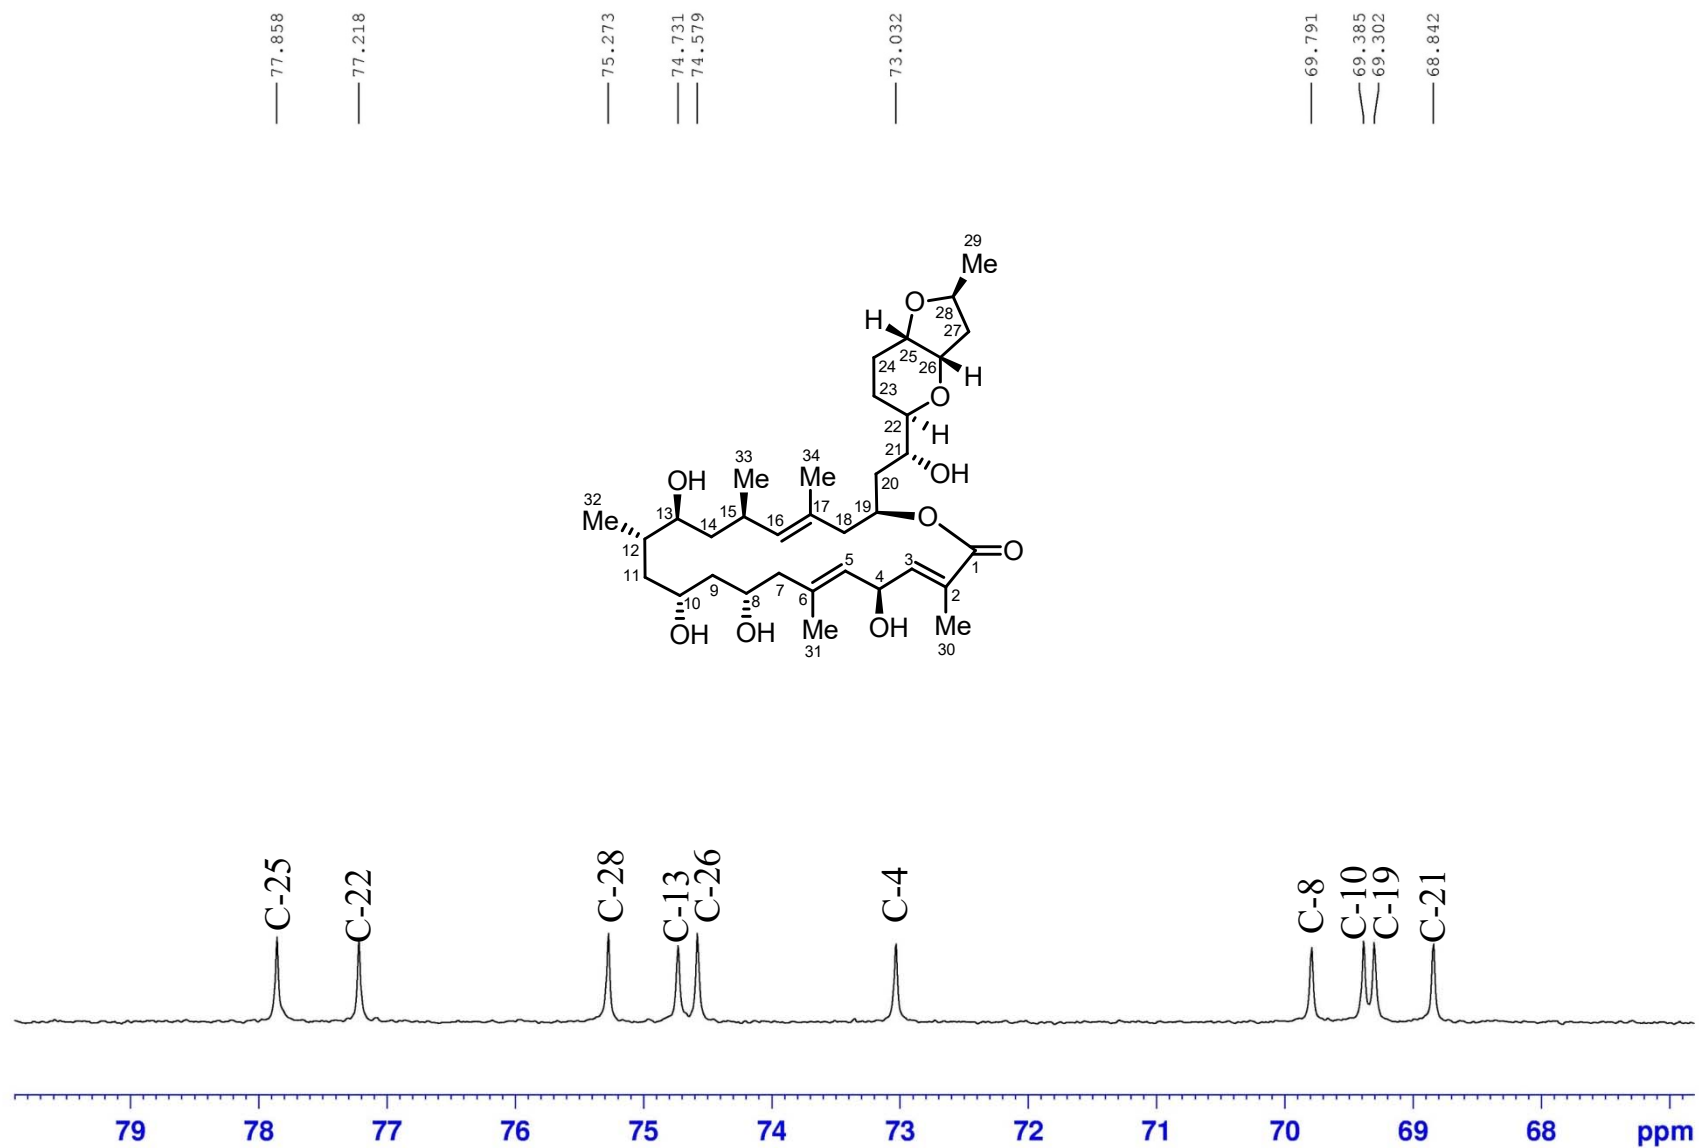

$^{13}\text{C}$  (175 MHz) NMR spectrum of compound **1** in  $\text{CD}_3\text{OD}$

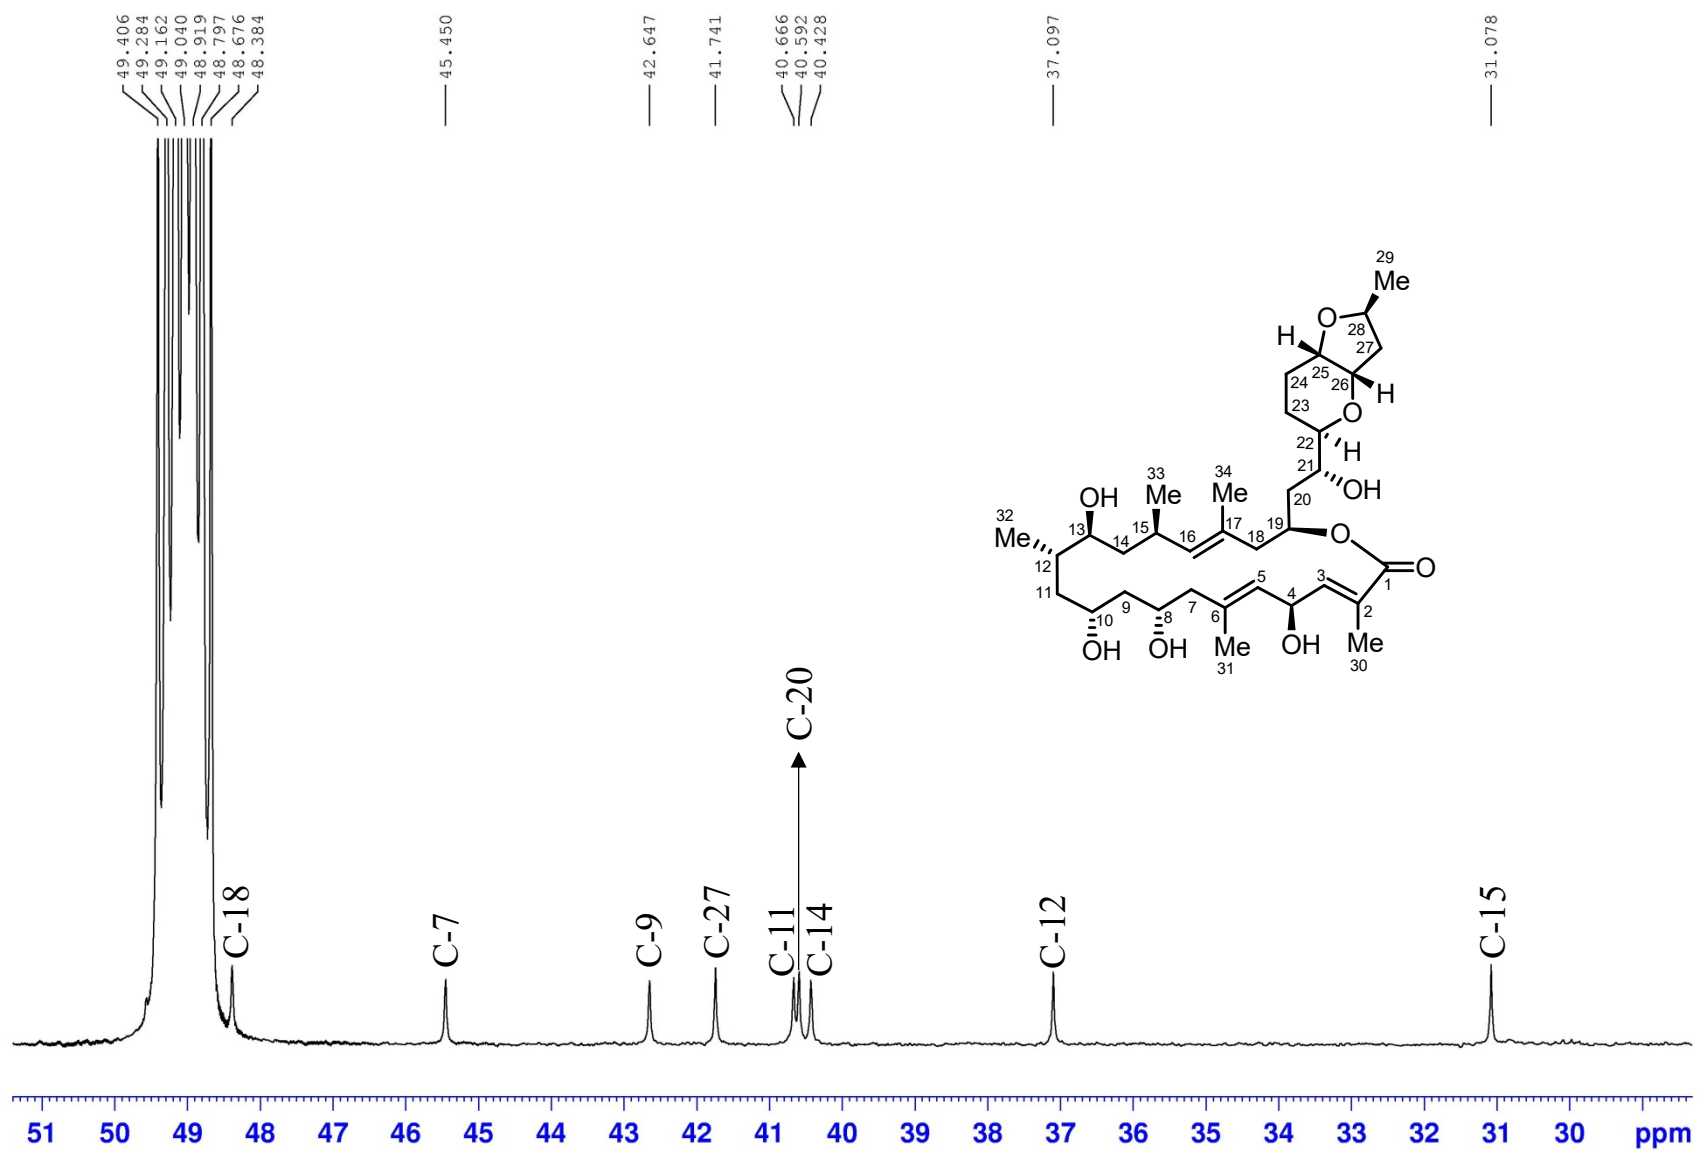

$^{13}\text{C}$  (175 MHz) NMR spectrum of compound **1** in  $\text{CD}_3\text{OD}$

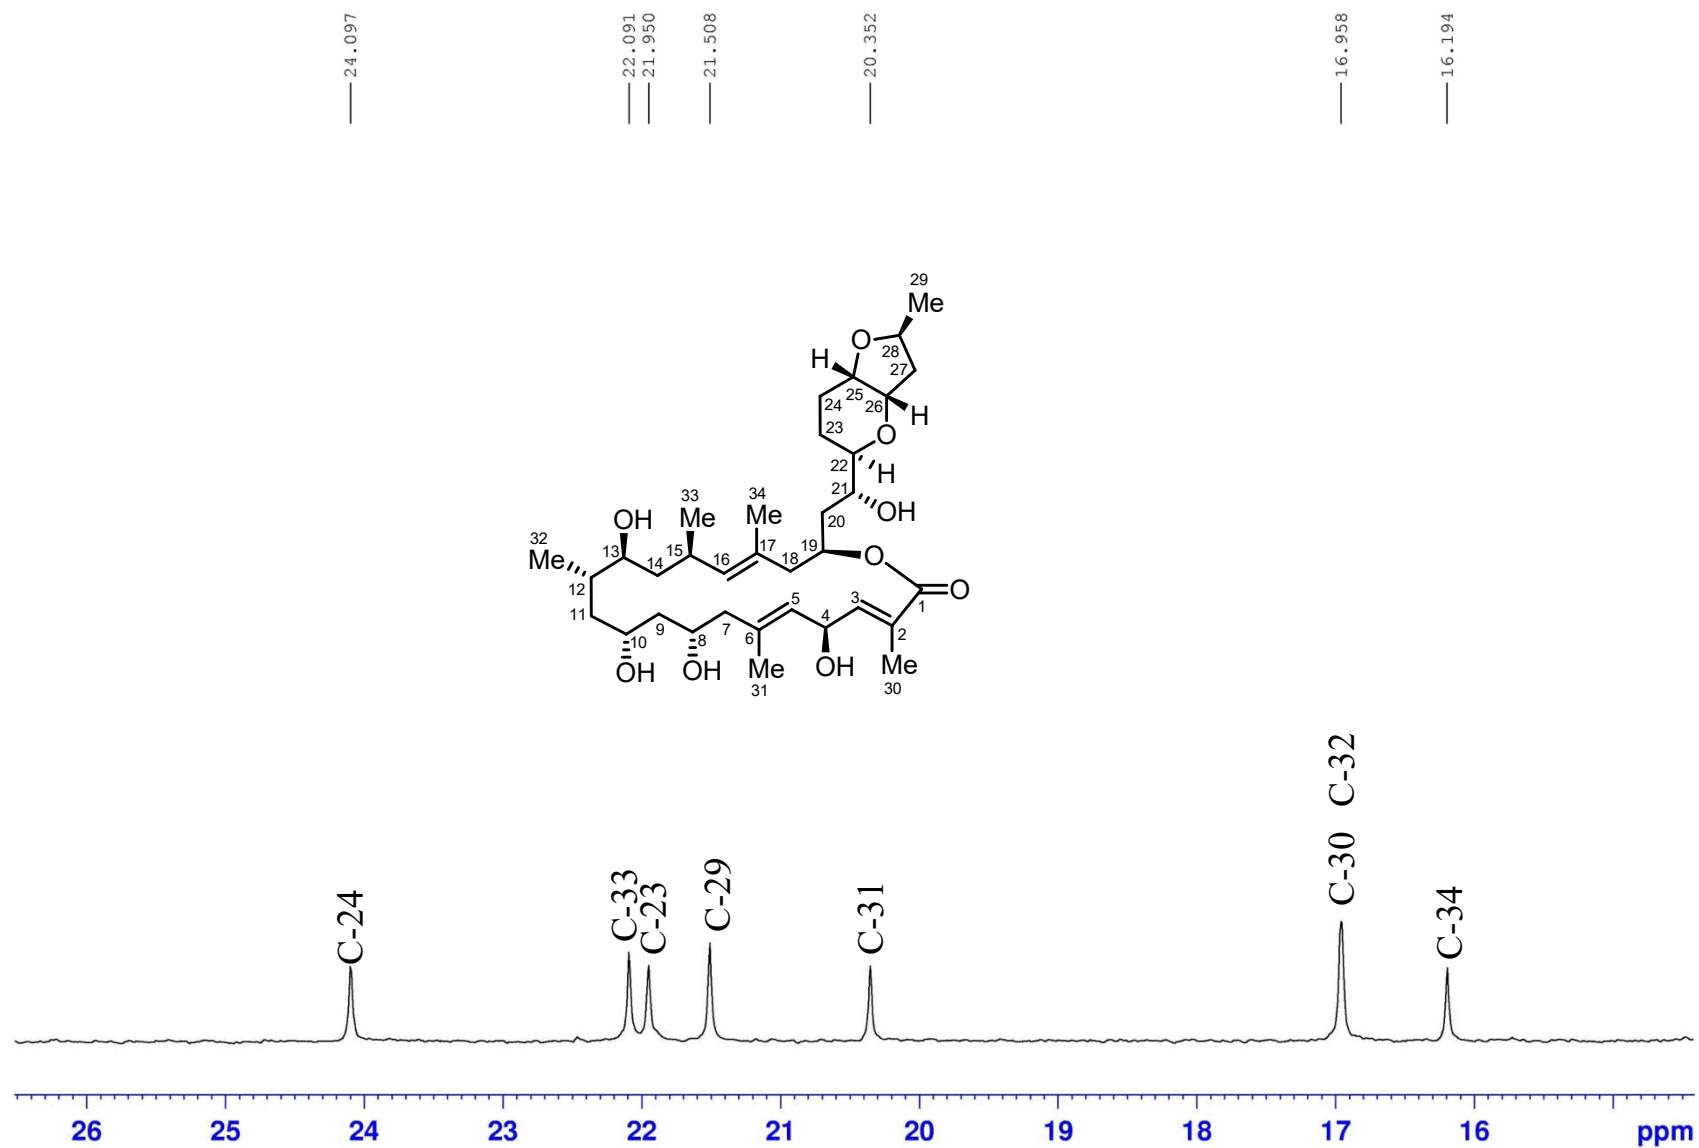

$^{13}\text{C}$  (175 MHz) NMR spectrum of compound **1** in  $\text{CD}_3\text{OH}$

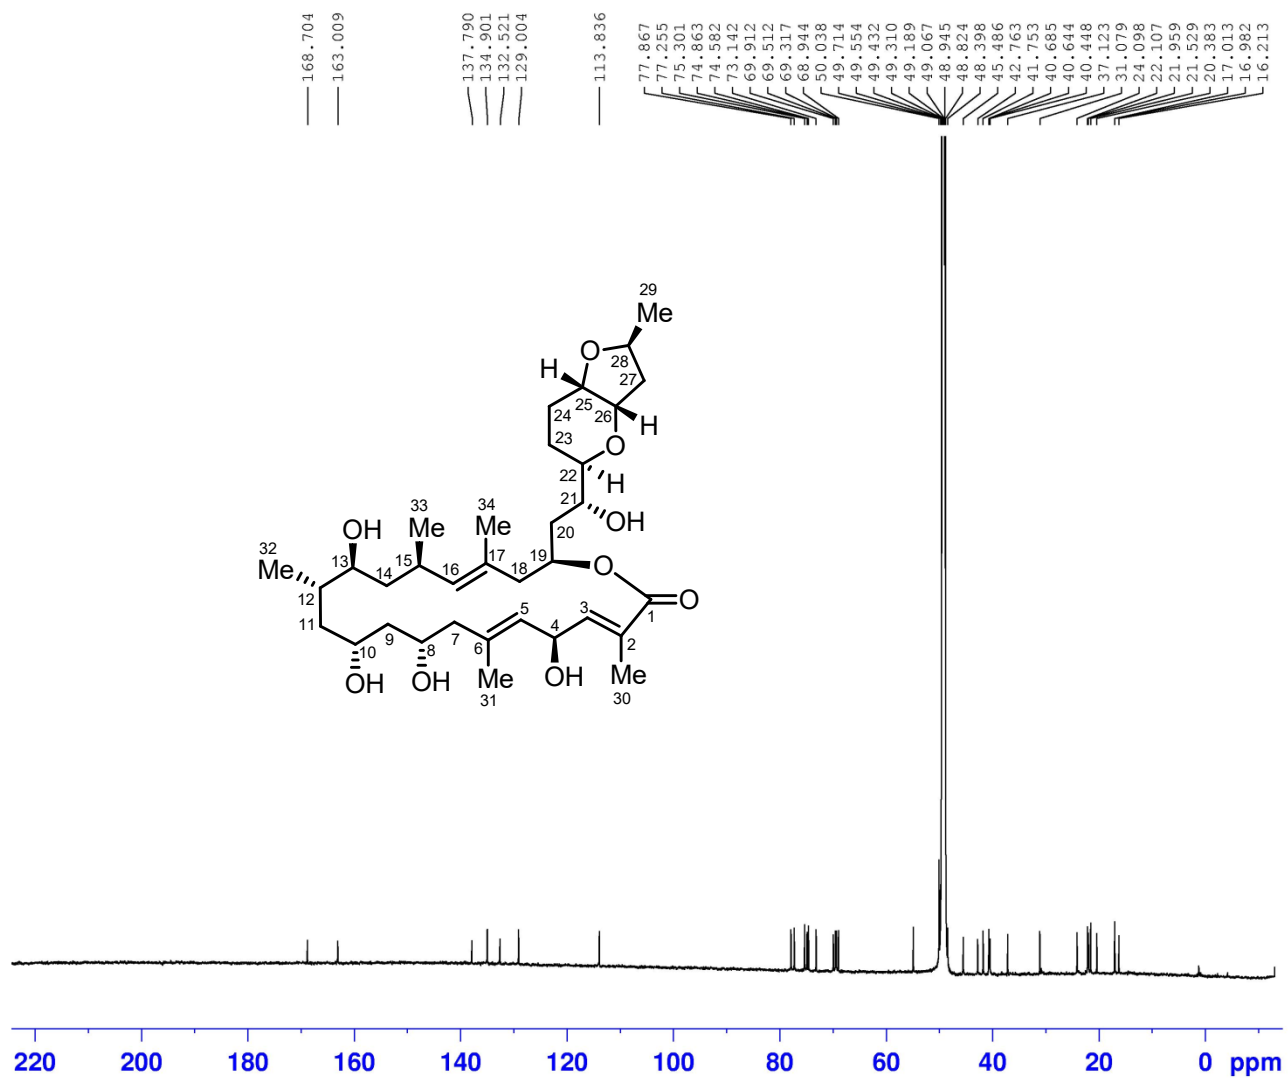

Comparison of  $^{13}\text{C}$  (175 MHz) NMR spectrum of compound **1** in  $\text{CD}_3\text{OH}$  with that in  $\text{CD}_3\text{OD}$

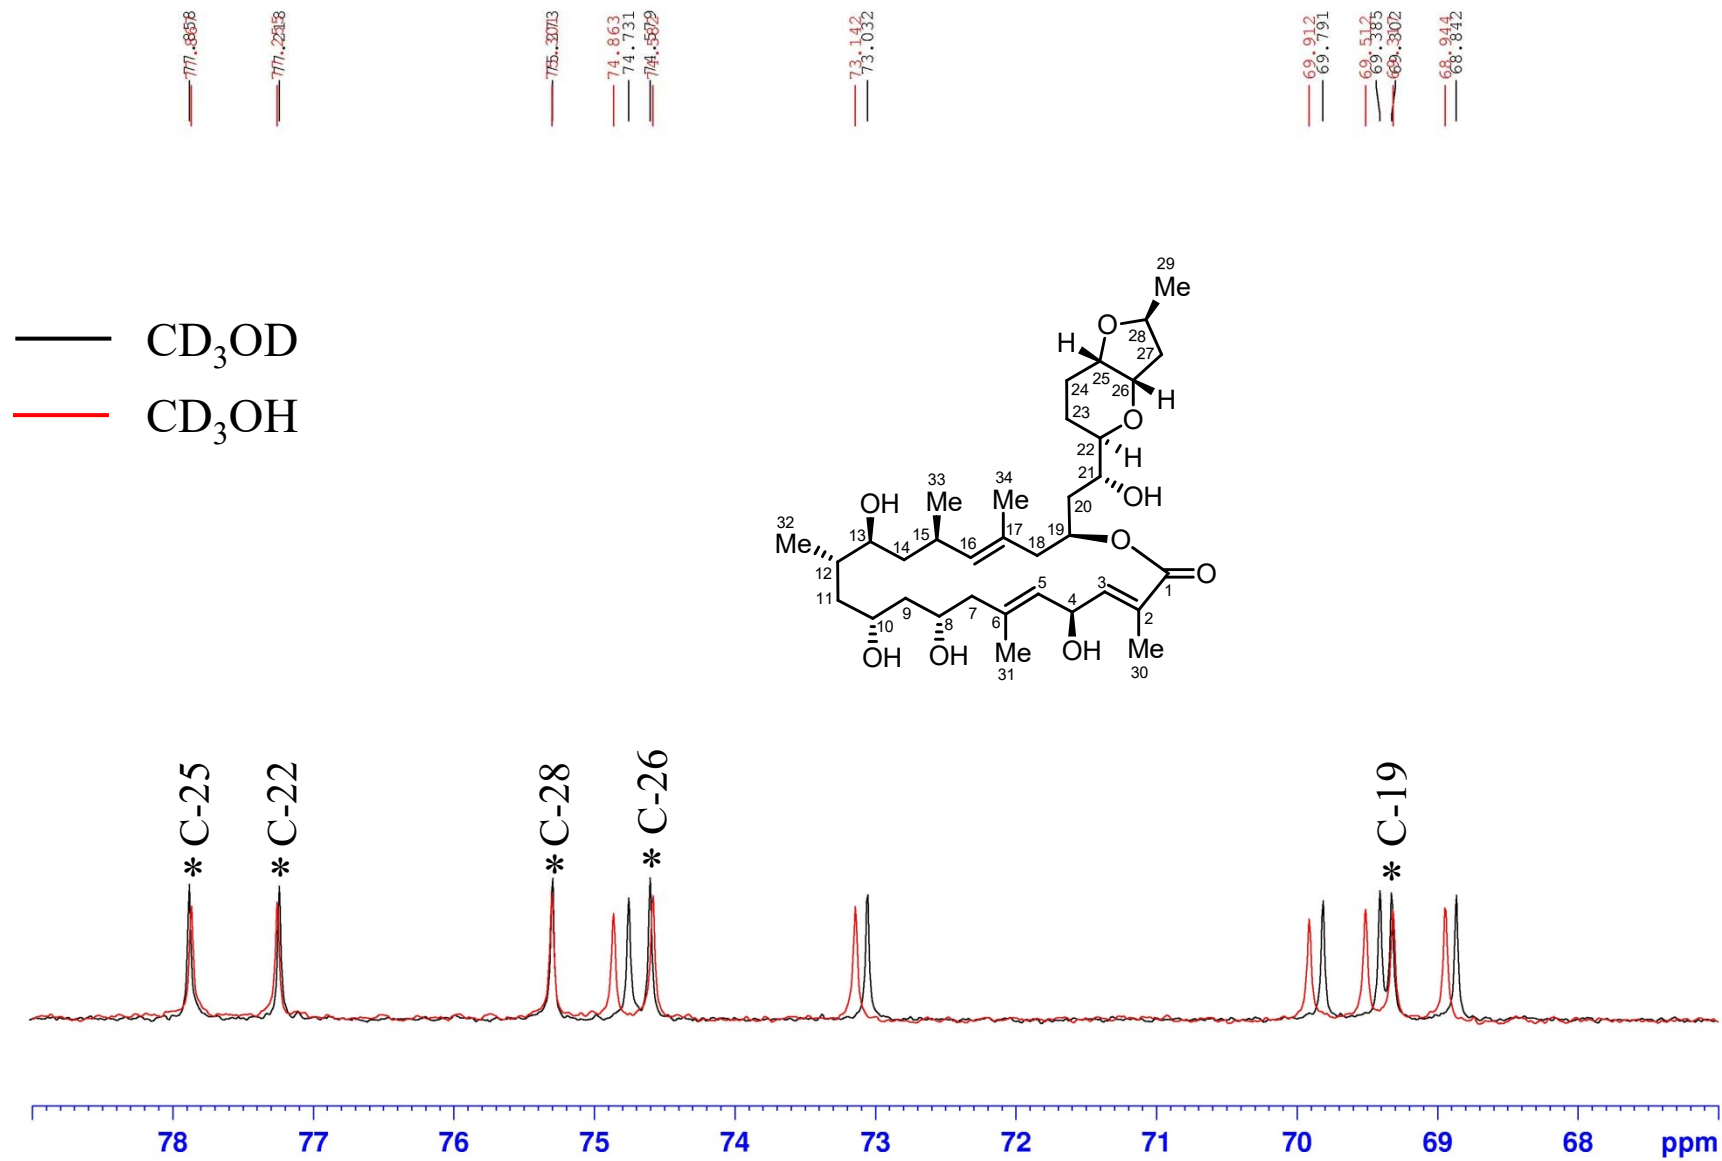

# DEPT135 (175 MHz) spectrum of compound **1** in CD<sub>3</sub>OD

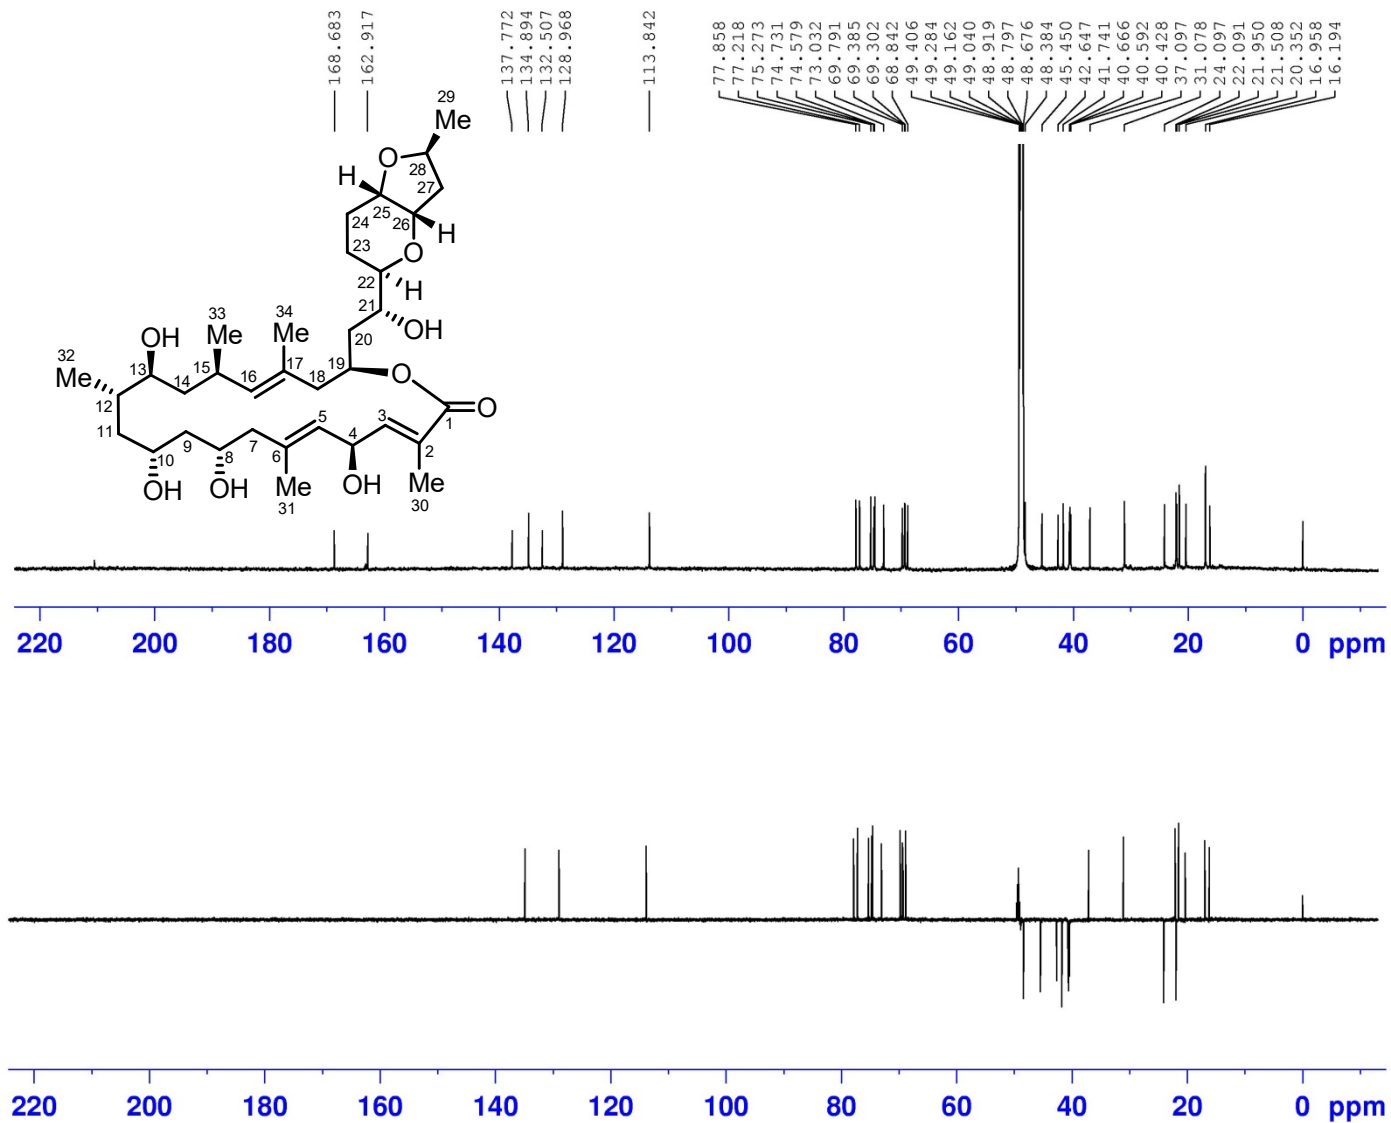



# DEPT135 (175 MHz) spectrum of compound **1** in CD<sub>3</sub>OD

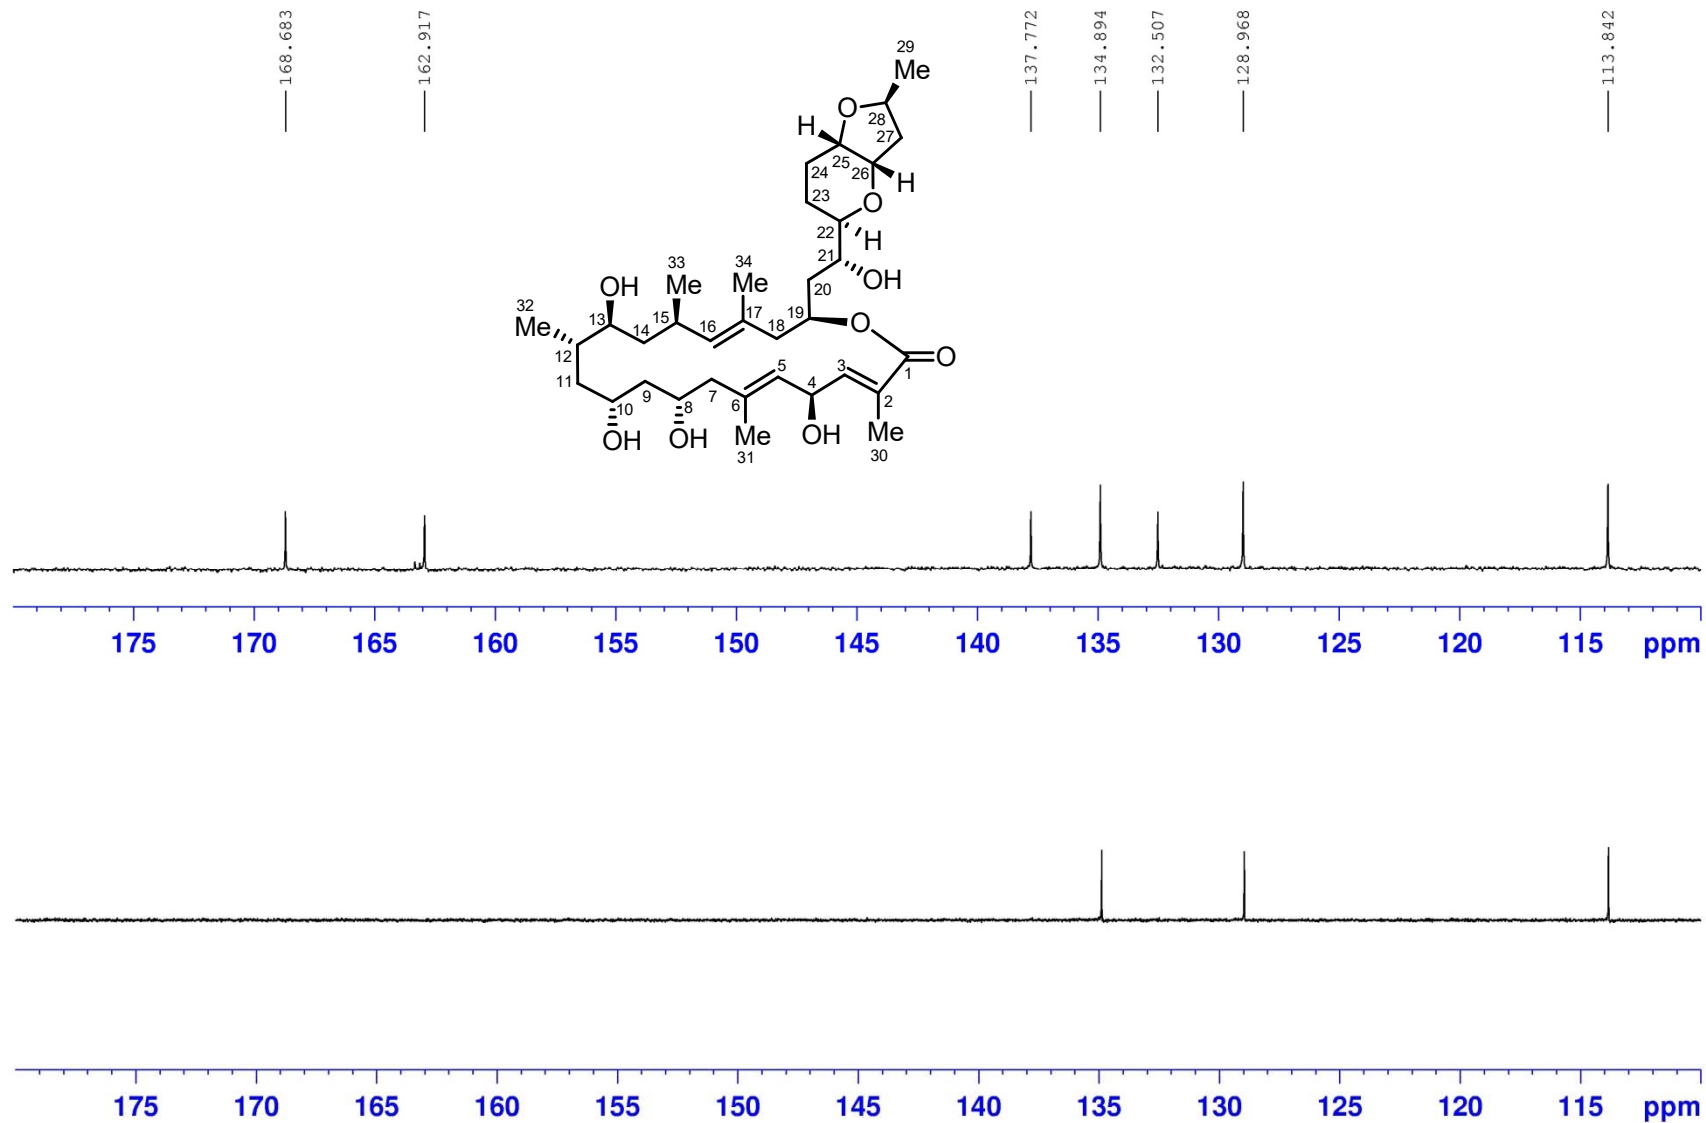

# DEPT135 (175 MHz) spectrum of compound **1** in CD<sub>3</sub>OD

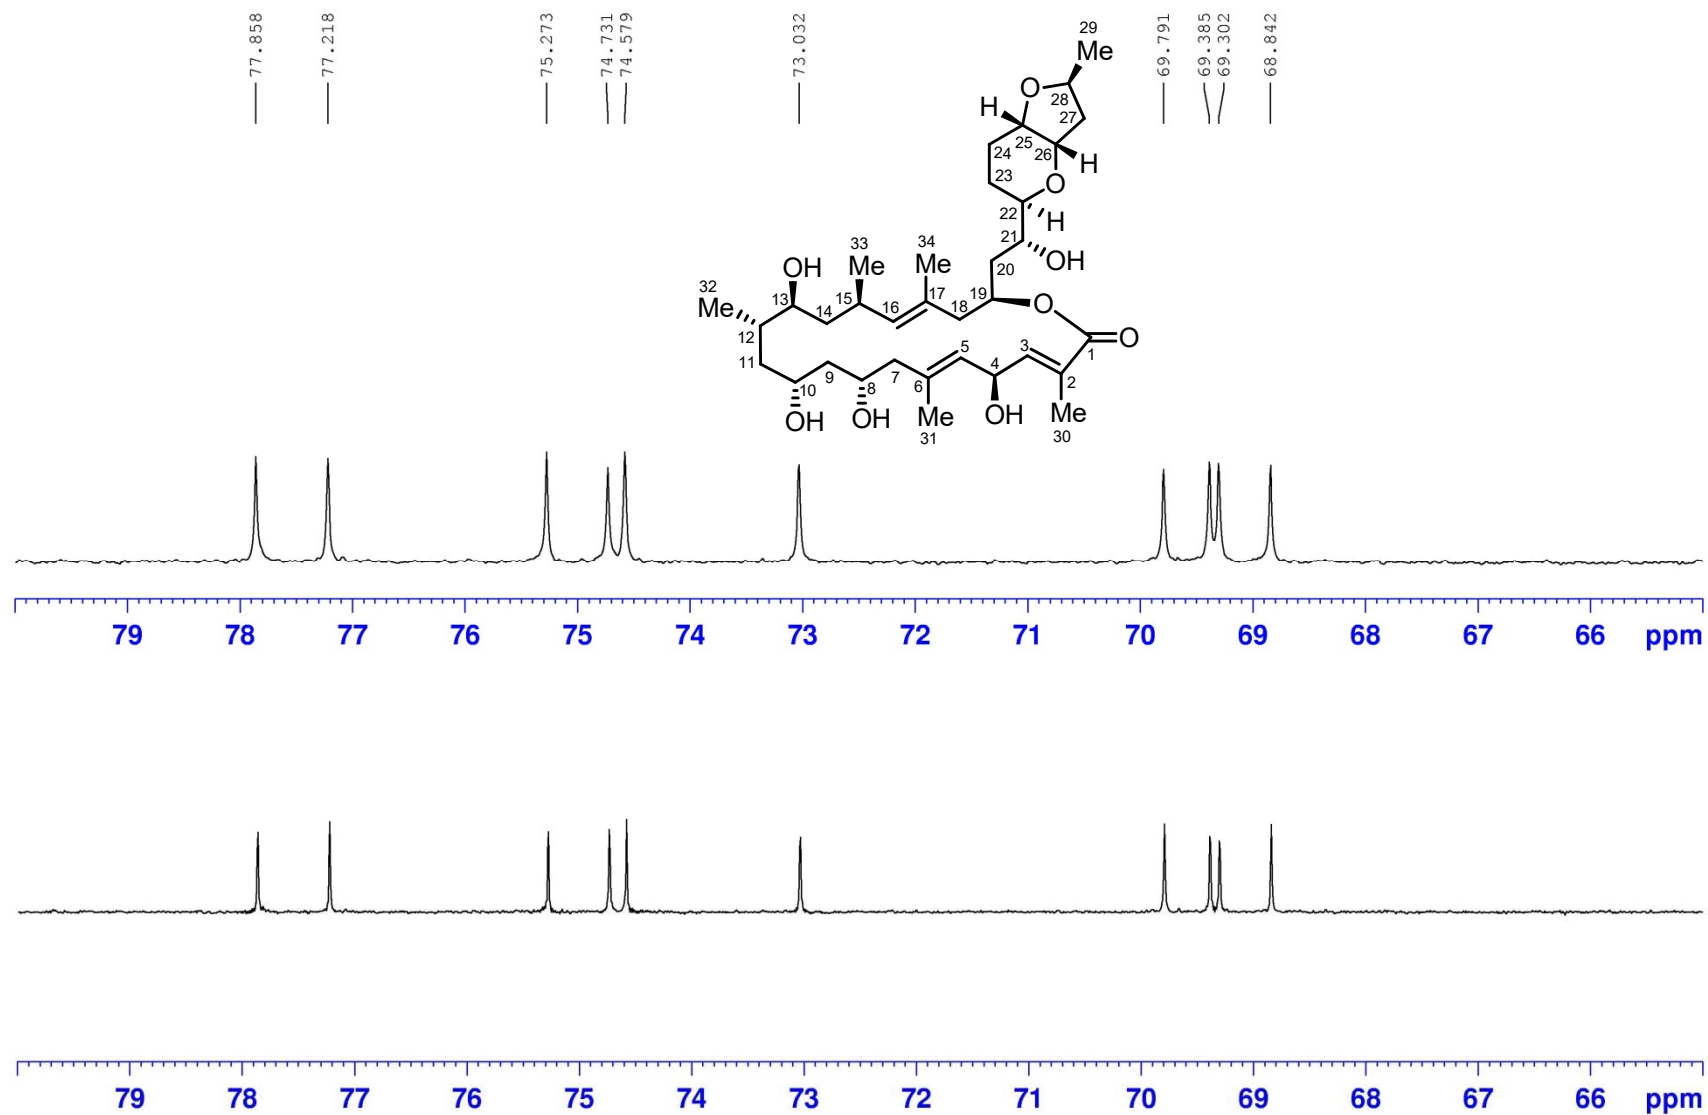

DEPT135 (175 MHz) spectrum of compound **1** in CD<sub>3</sub>OD

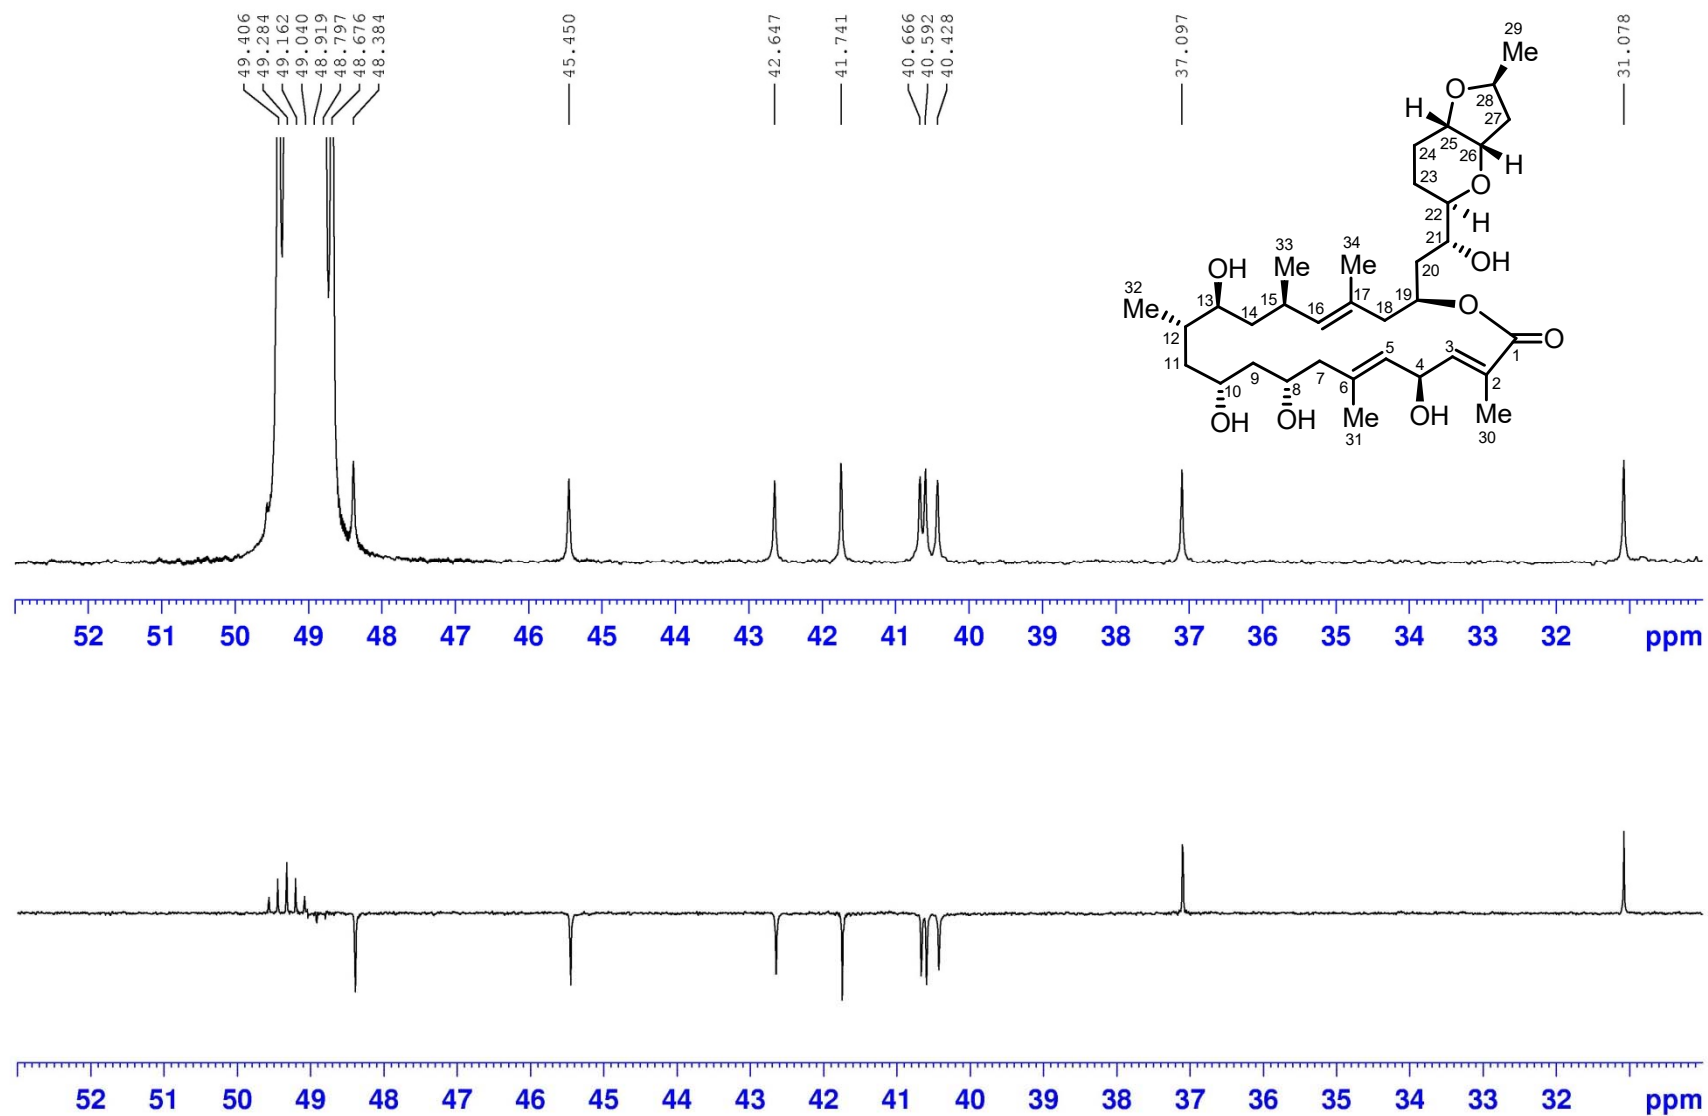

# DEPT135 (175 MHz) spectrum of compound **1** in CD<sub>3</sub>OD

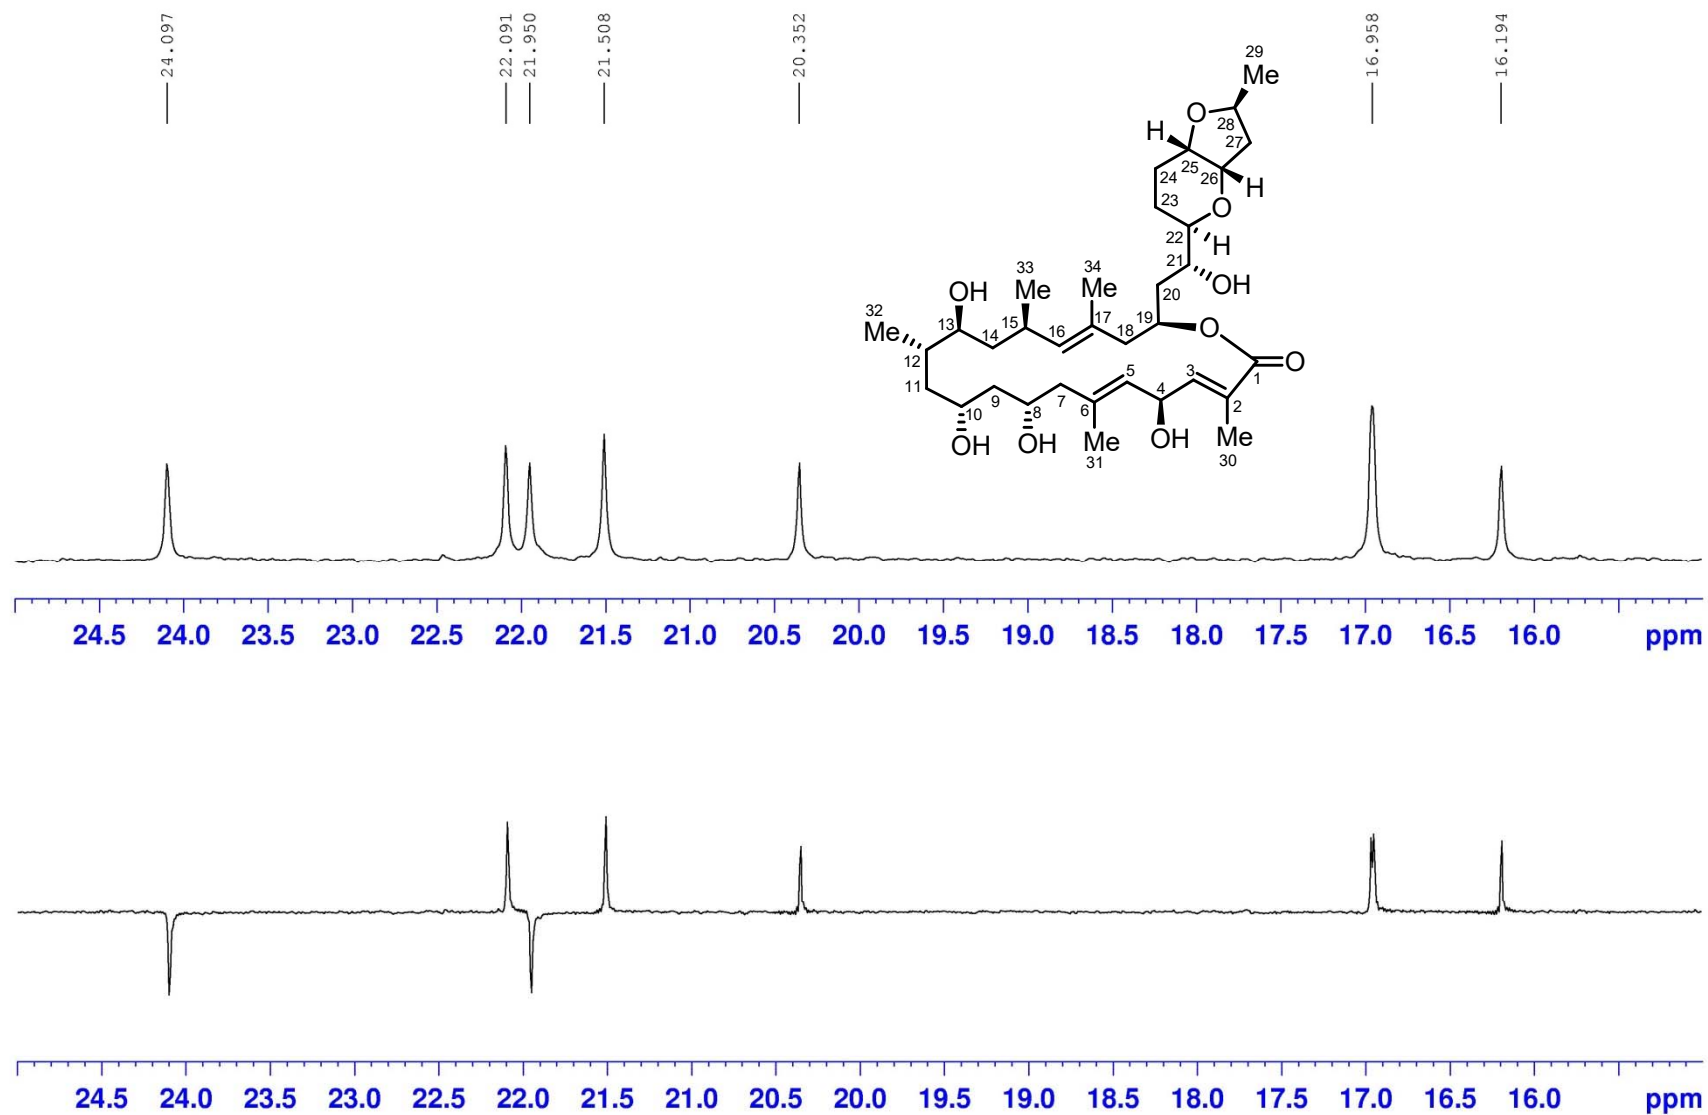

$^1\text{H}$ - $^1\text{H}$  COSY (700 MHz) spectrum of compound **1** in  $\text{CD}_3\text{OD}$

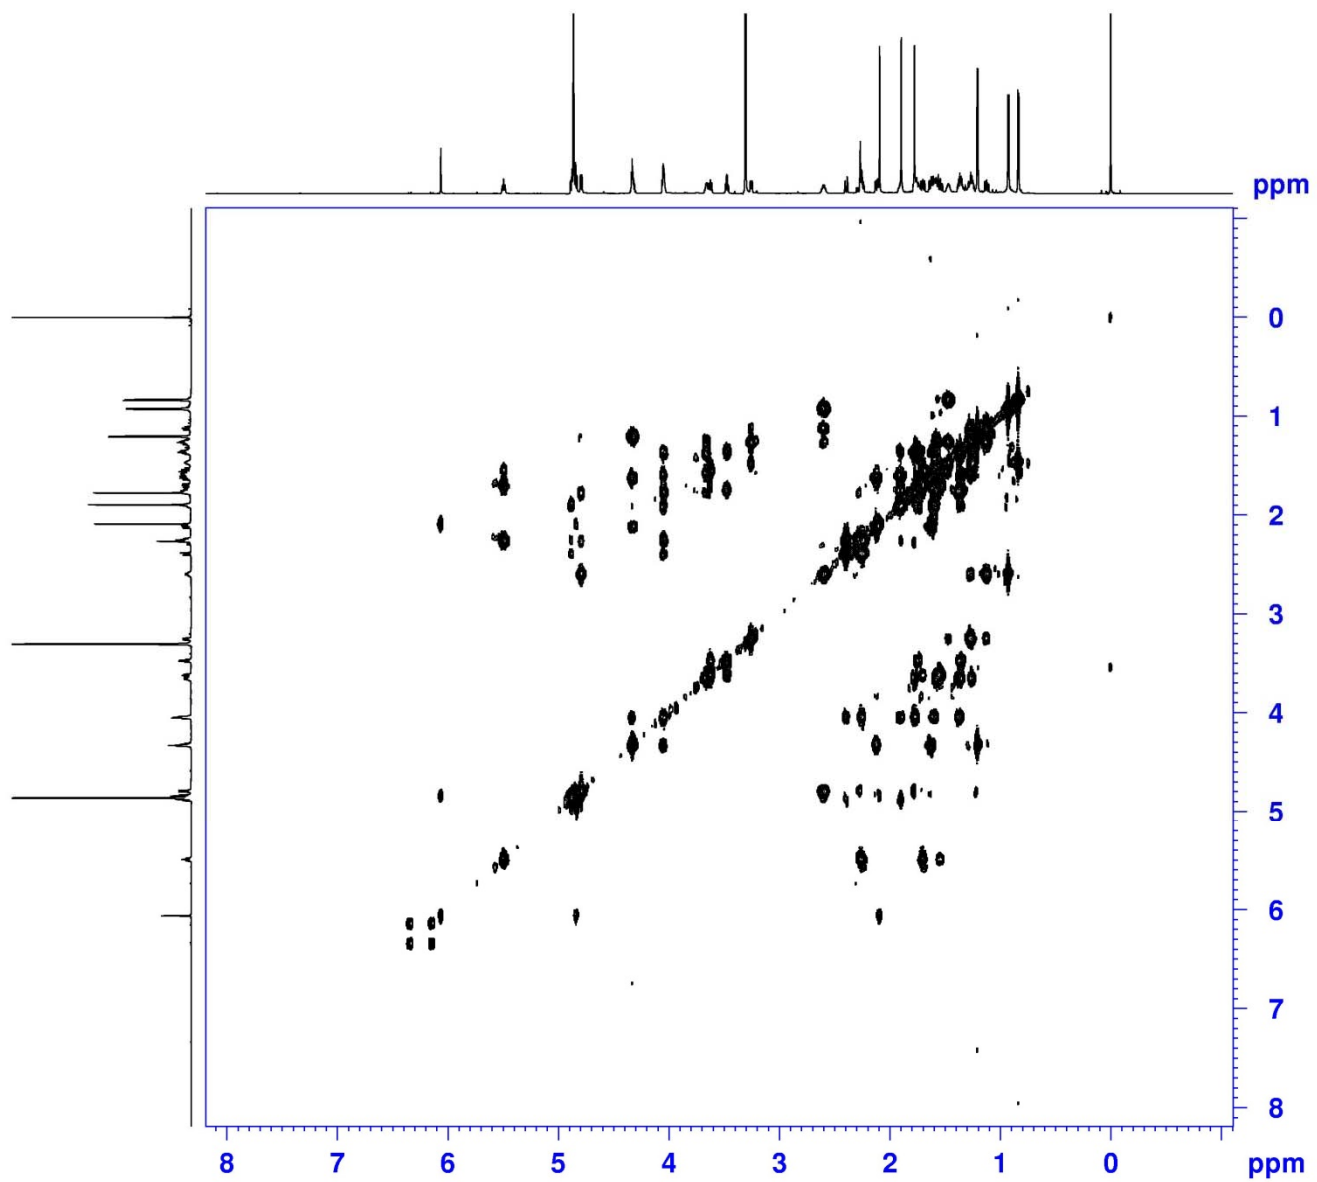

$^1\text{H}$ - $^1\text{H}$  COSY (700 MHz) spectrum of compound **1** in  $\text{CD}_3\text{OD}$

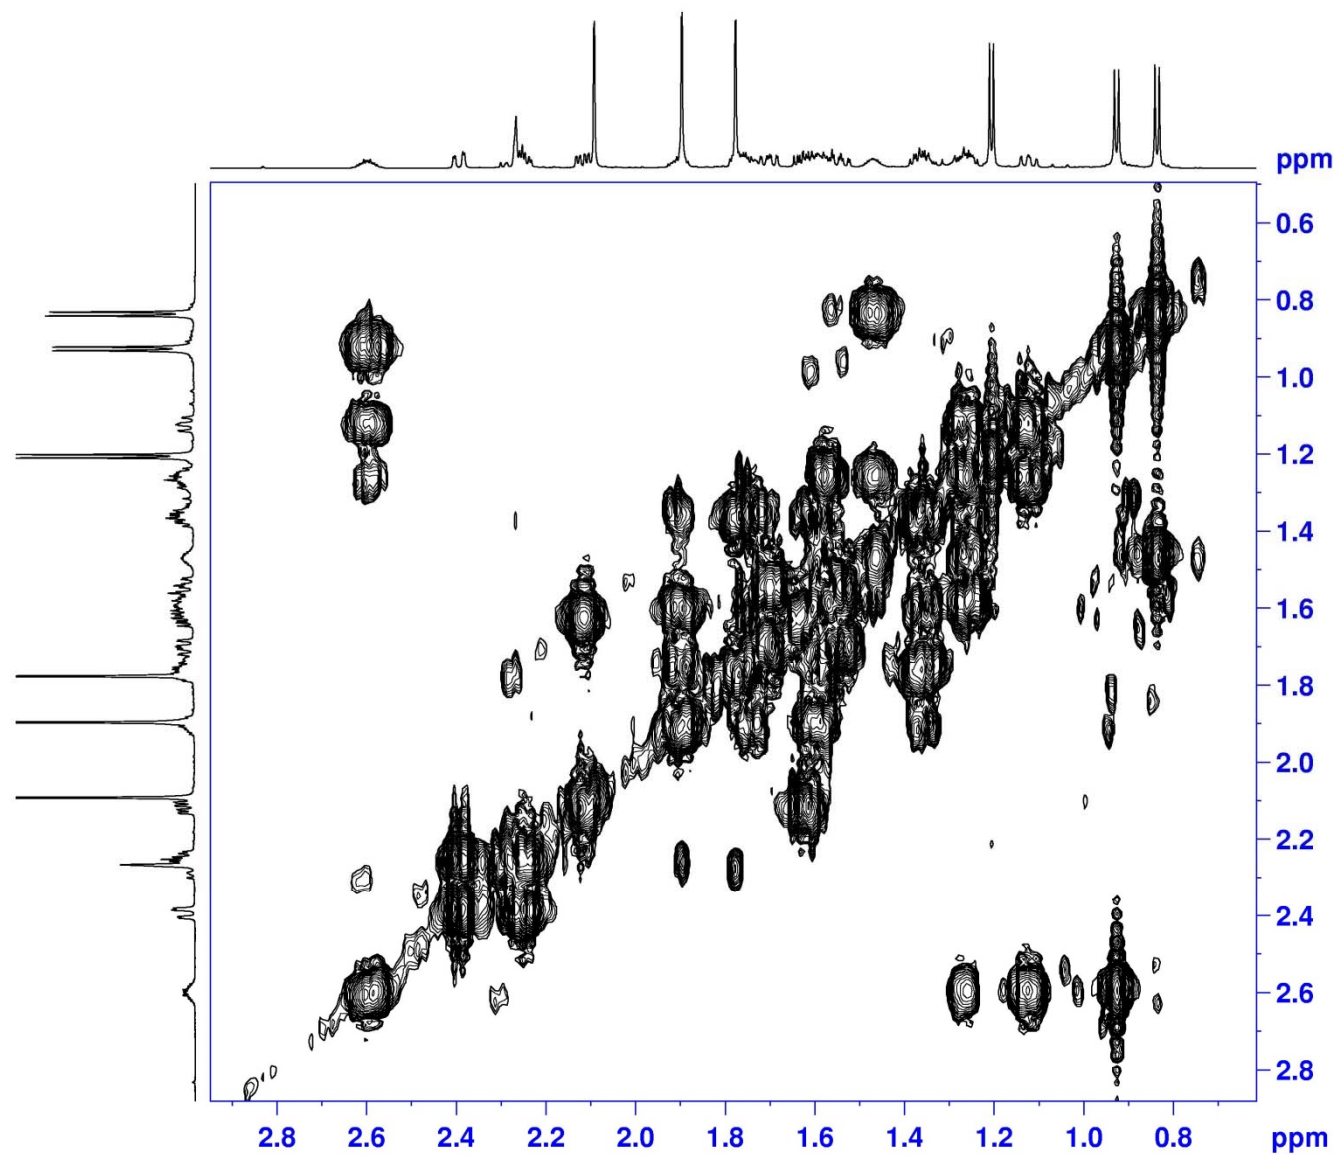

$^1\text{H}$ - $^1\text{H}$  COSY (700 MHz) spectrum of compound **1** in  $\text{CD}_3\text{OD}$

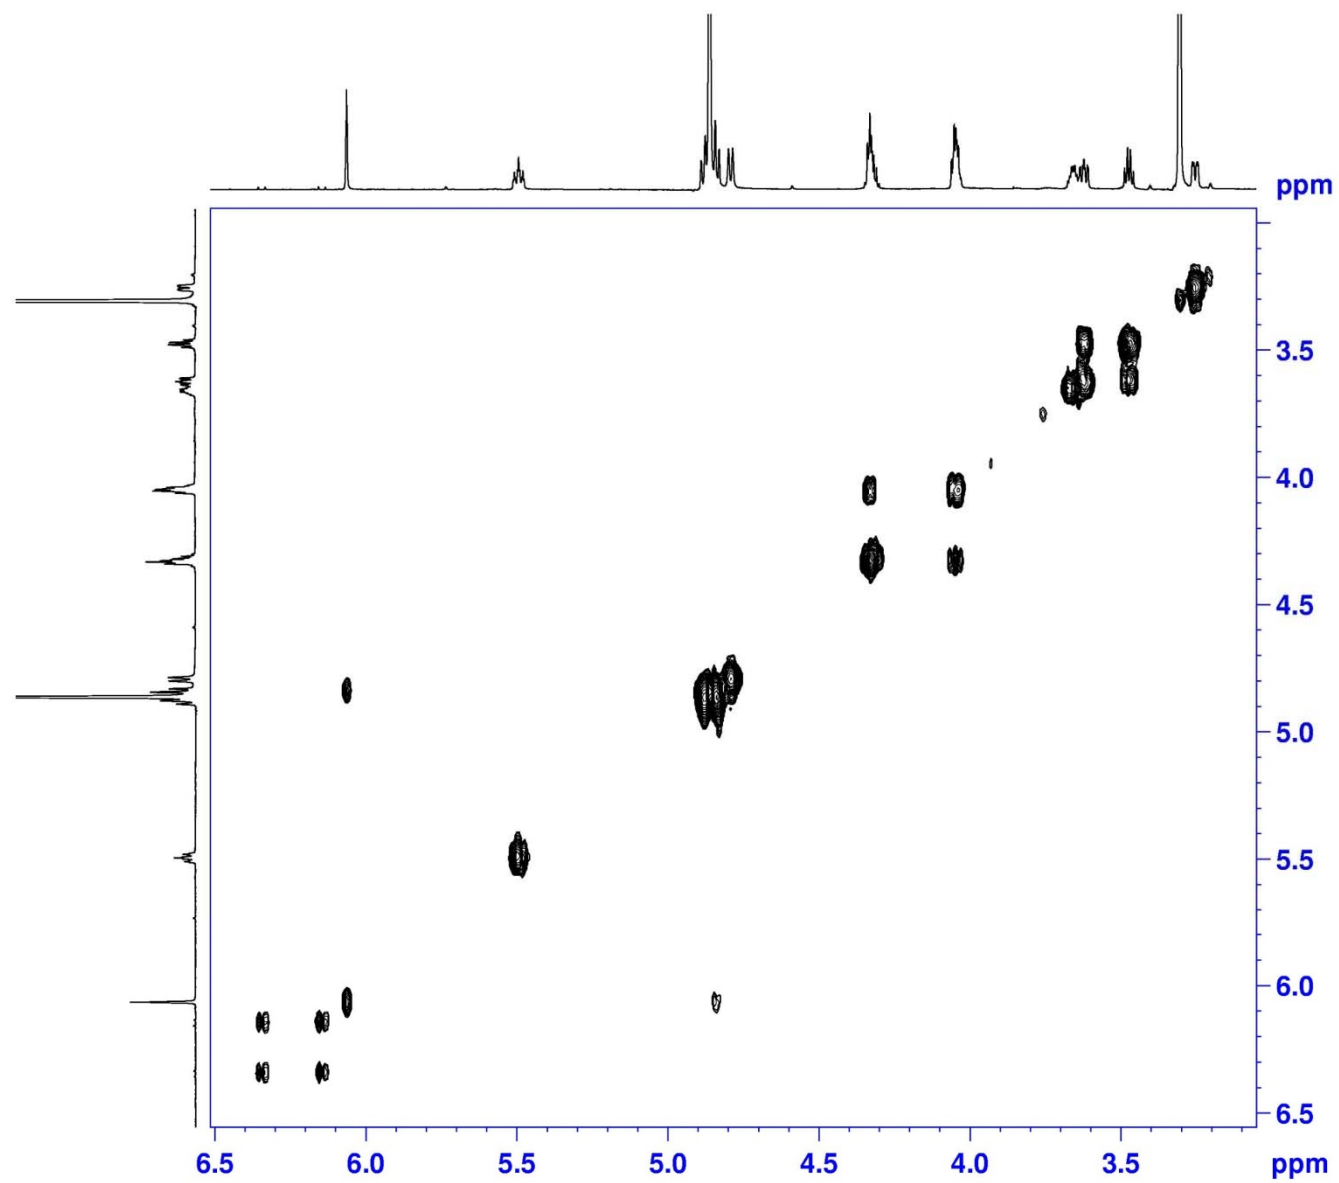

$^1\text{H}$ - $^1\text{H}$  COSY (700 MHz) spectrum of compound **1** in  $\text{CD}_3\text{OD}$

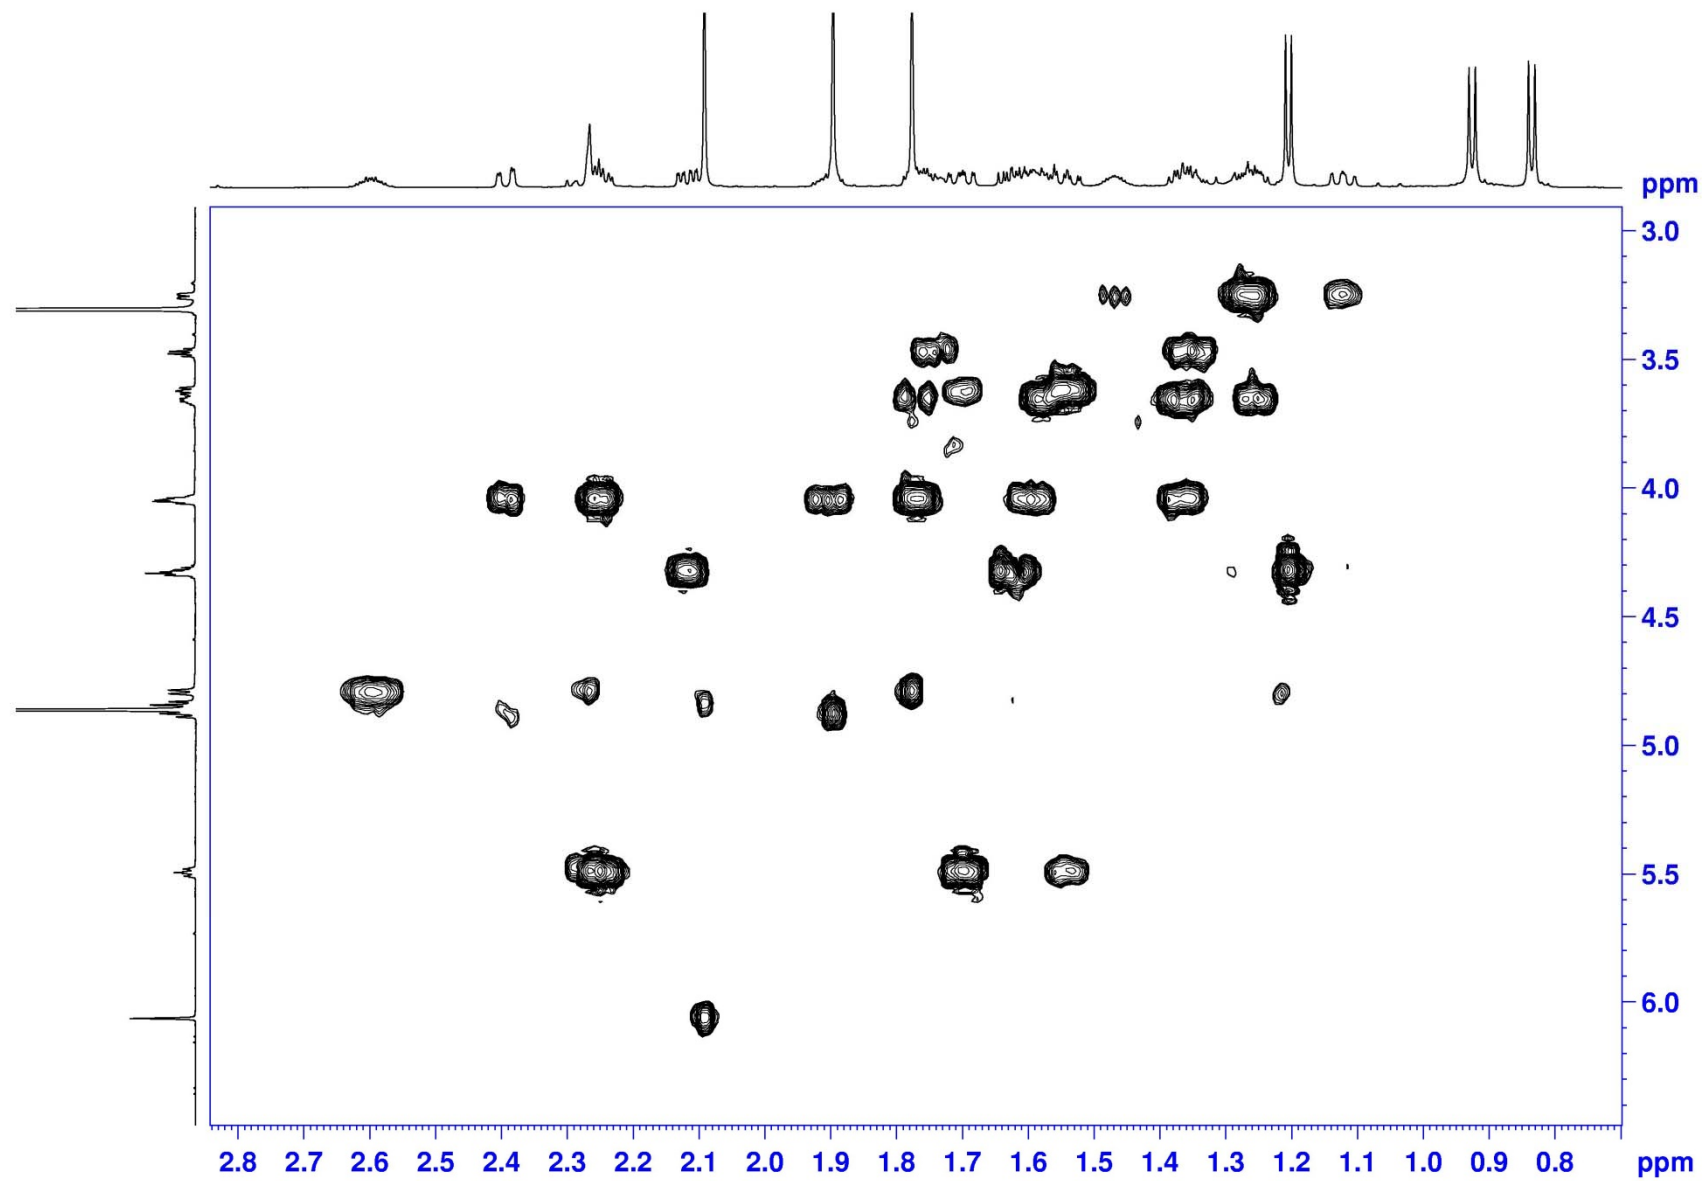



# HSQC (700 MHz) spectrum of compound **1** in CD<sub>3</sub>OD

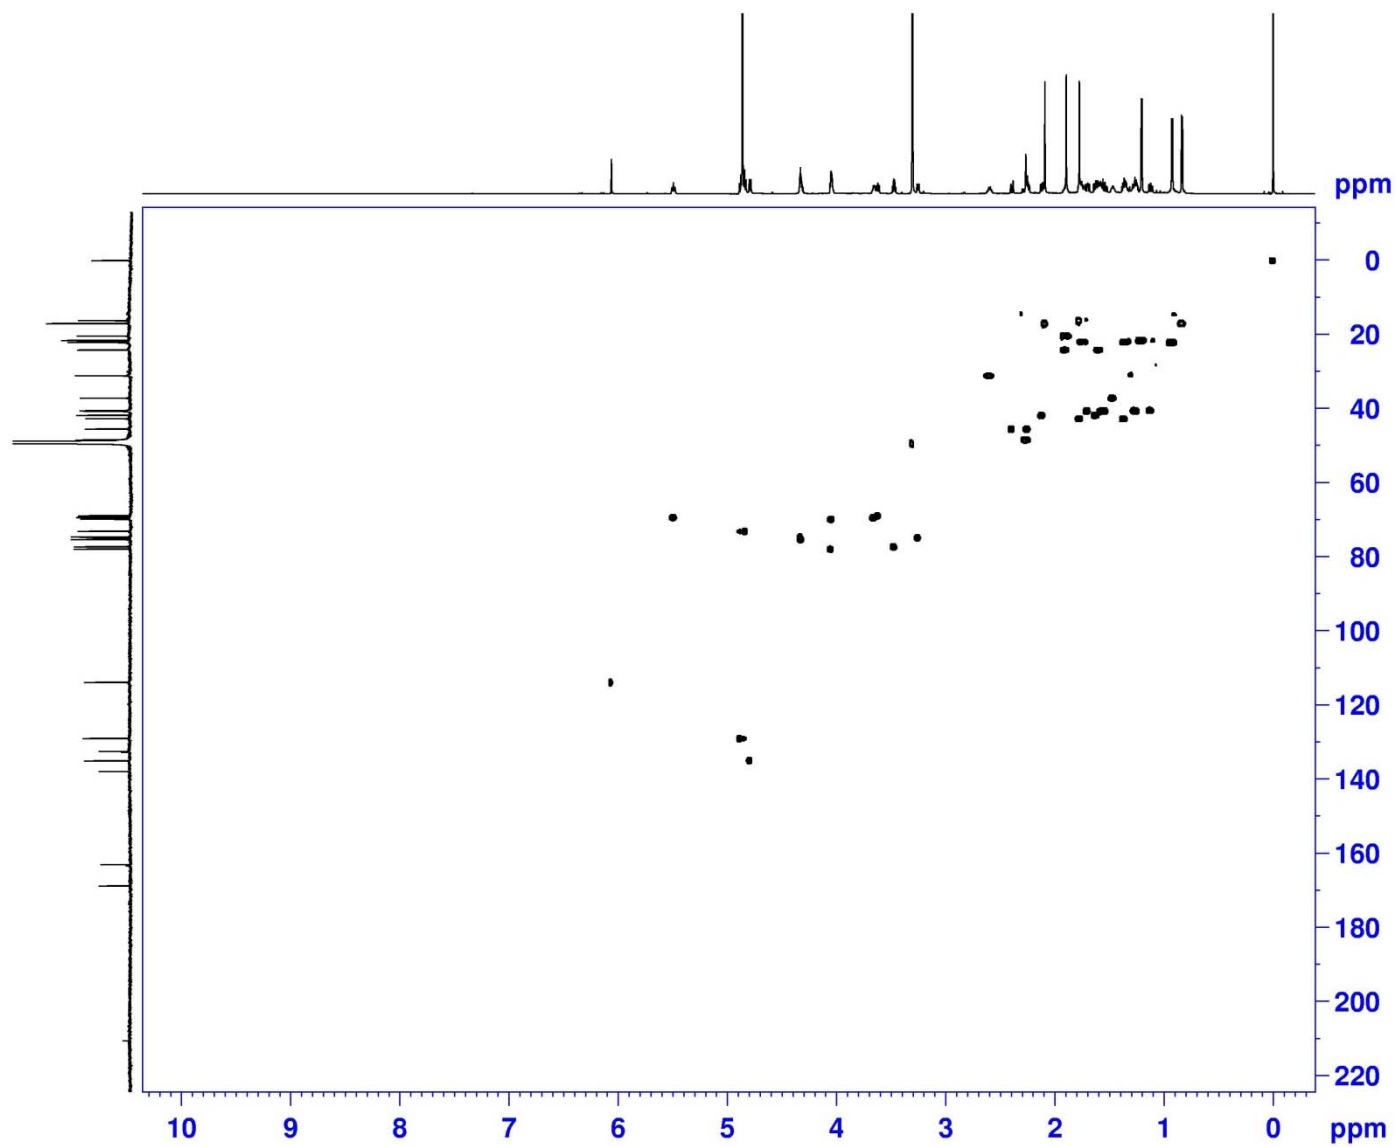

HSQC (700 MHz) spectrum of compound **1** in CD<sub>3</sub>OD

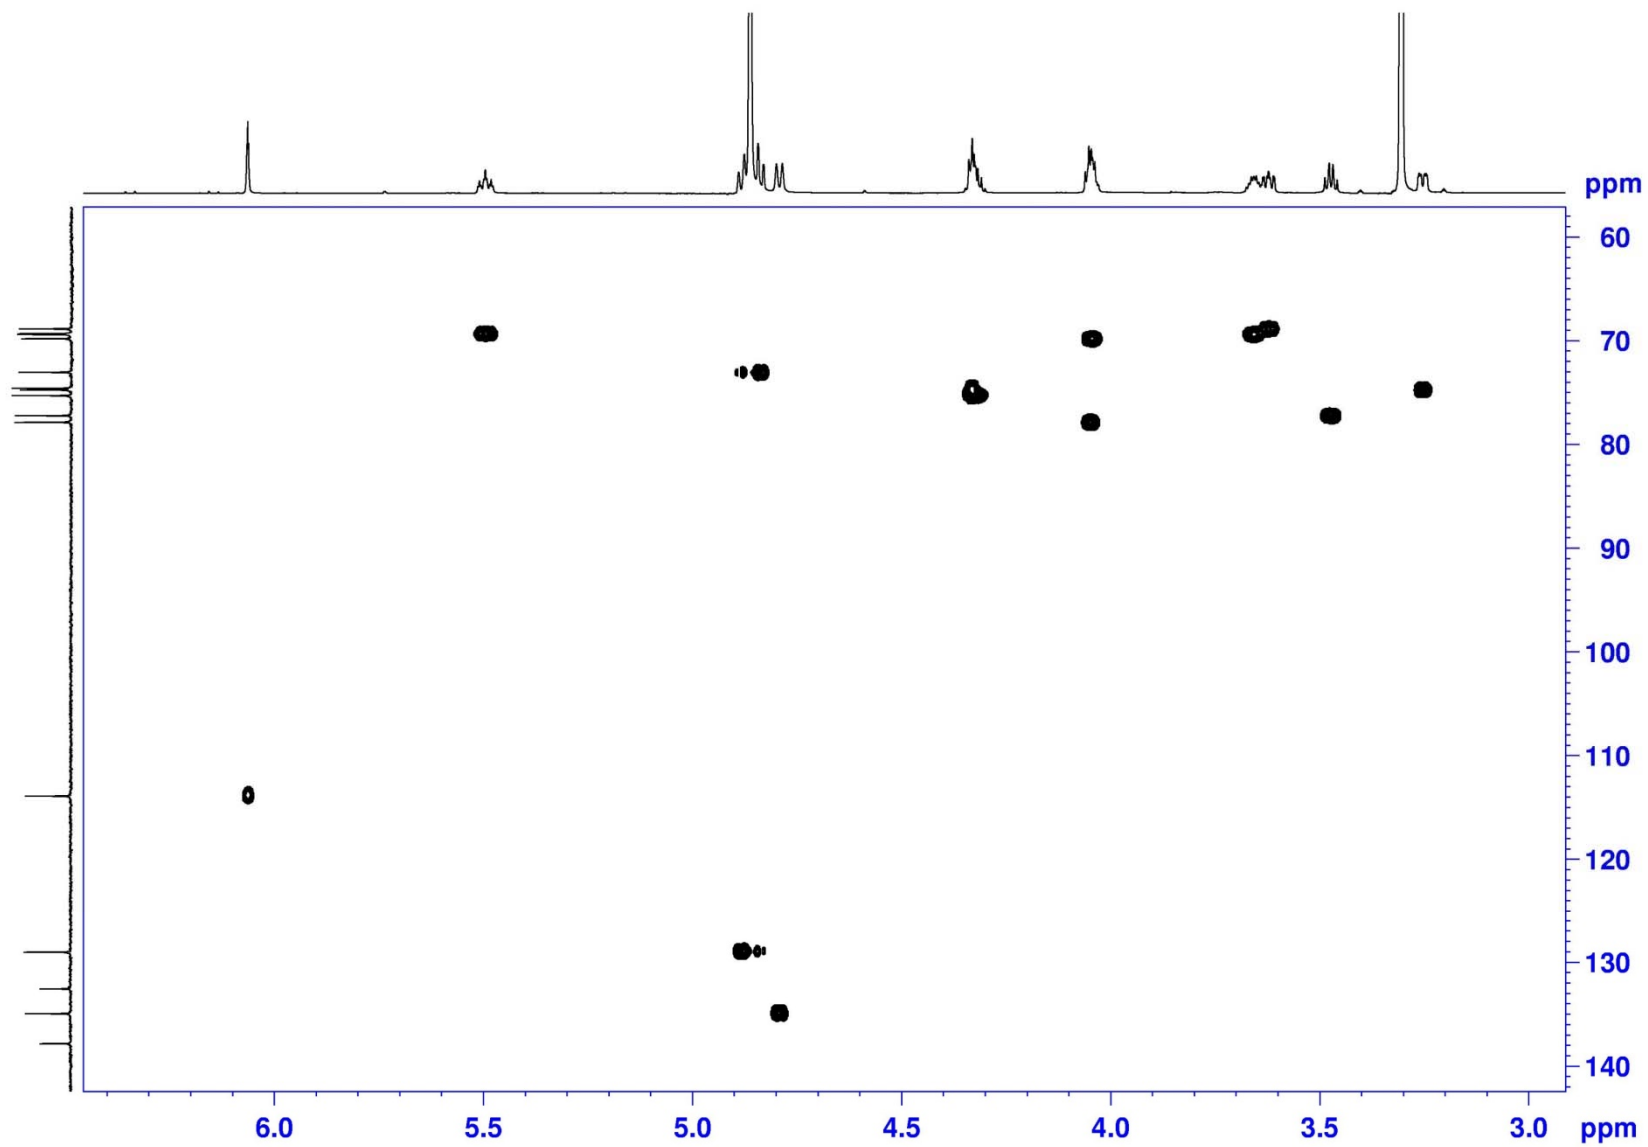

# HSQC (700 MHz) spectrum of compound **1** in CD<sub>3</sub>OD

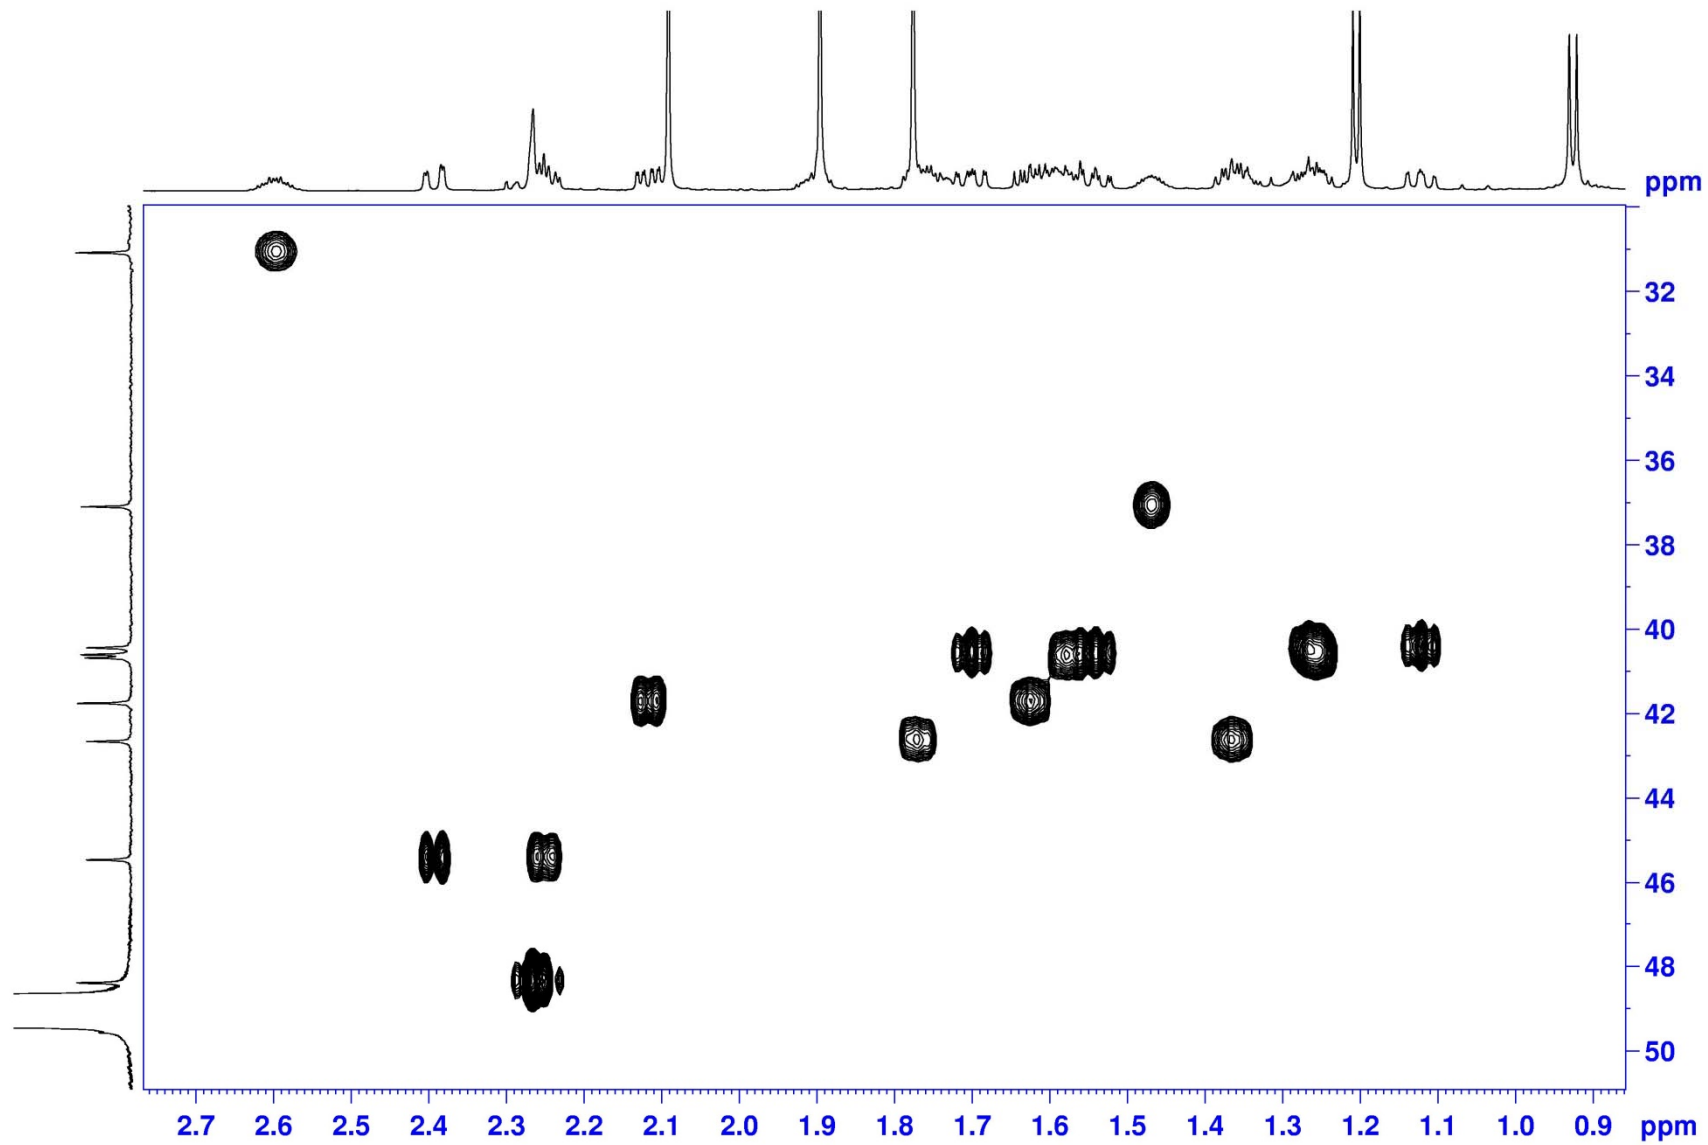

# HSQC (700 MHz) spectrum of compound **1** in CD<sub>3</sub>OD

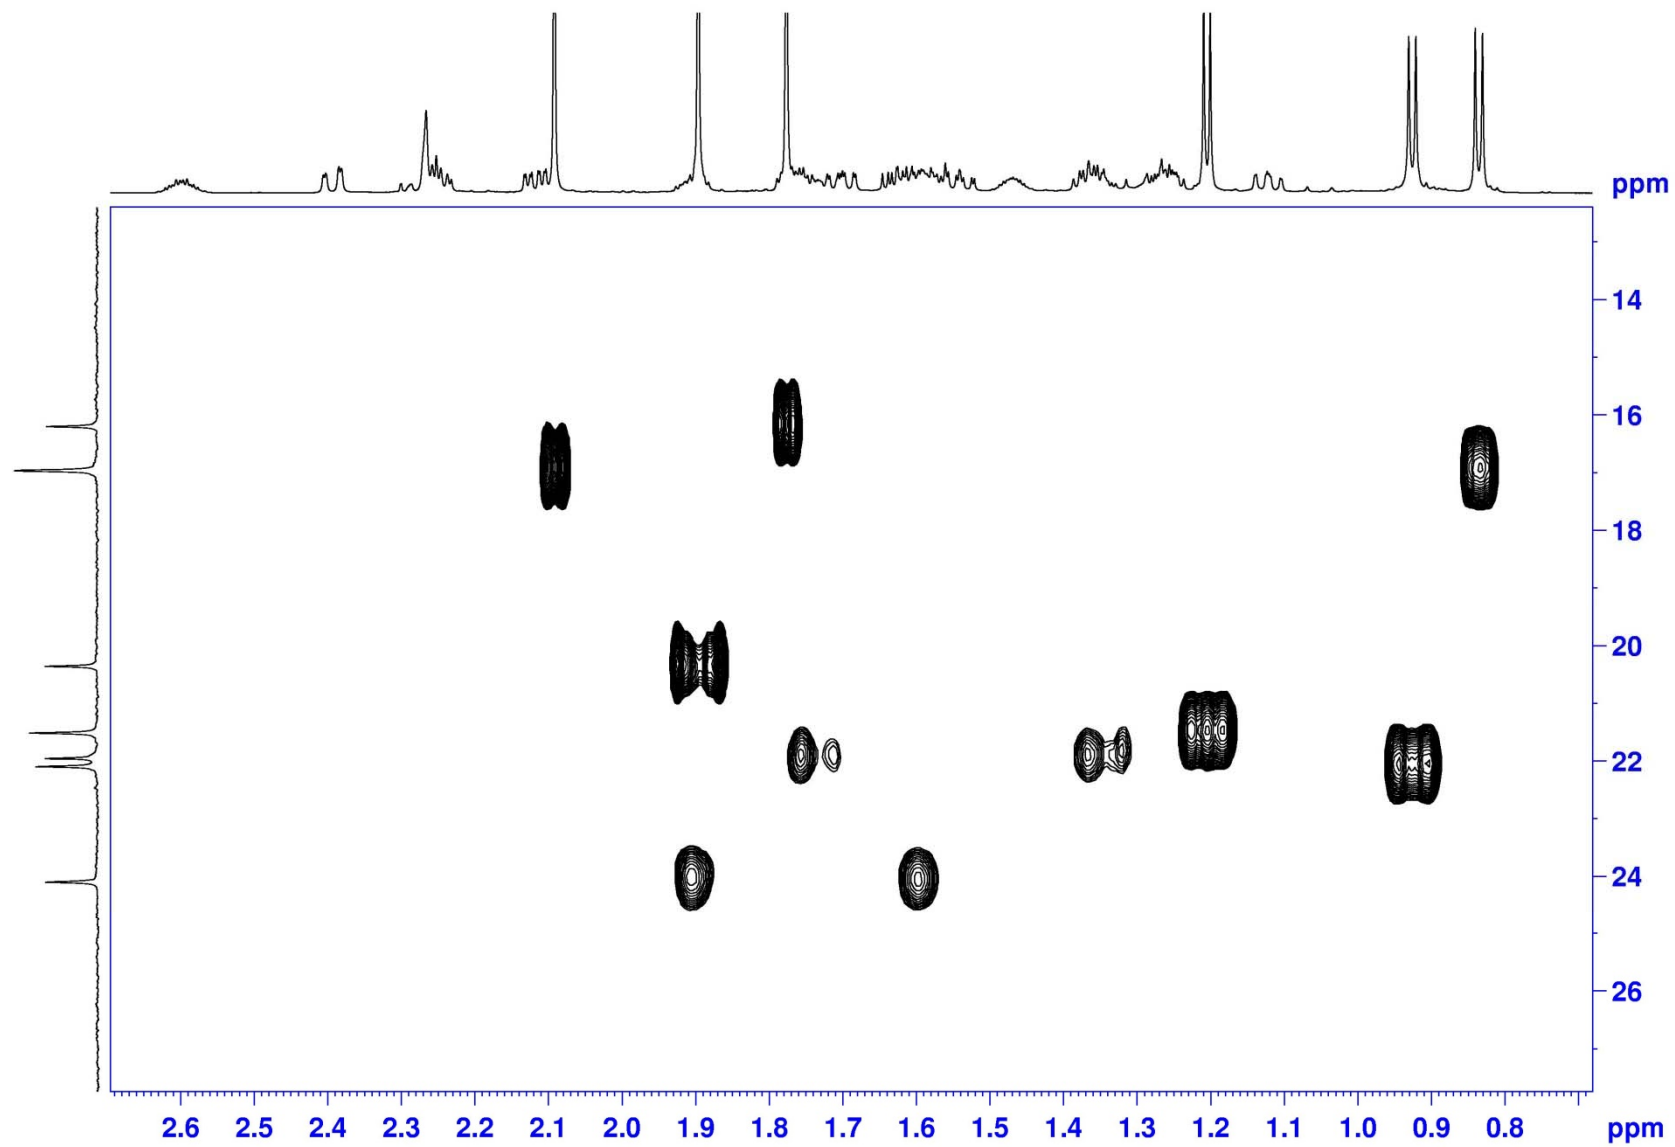

# HMBC (700 MHz) spectrum of compound **1** in CD<sub>3</sub>OD

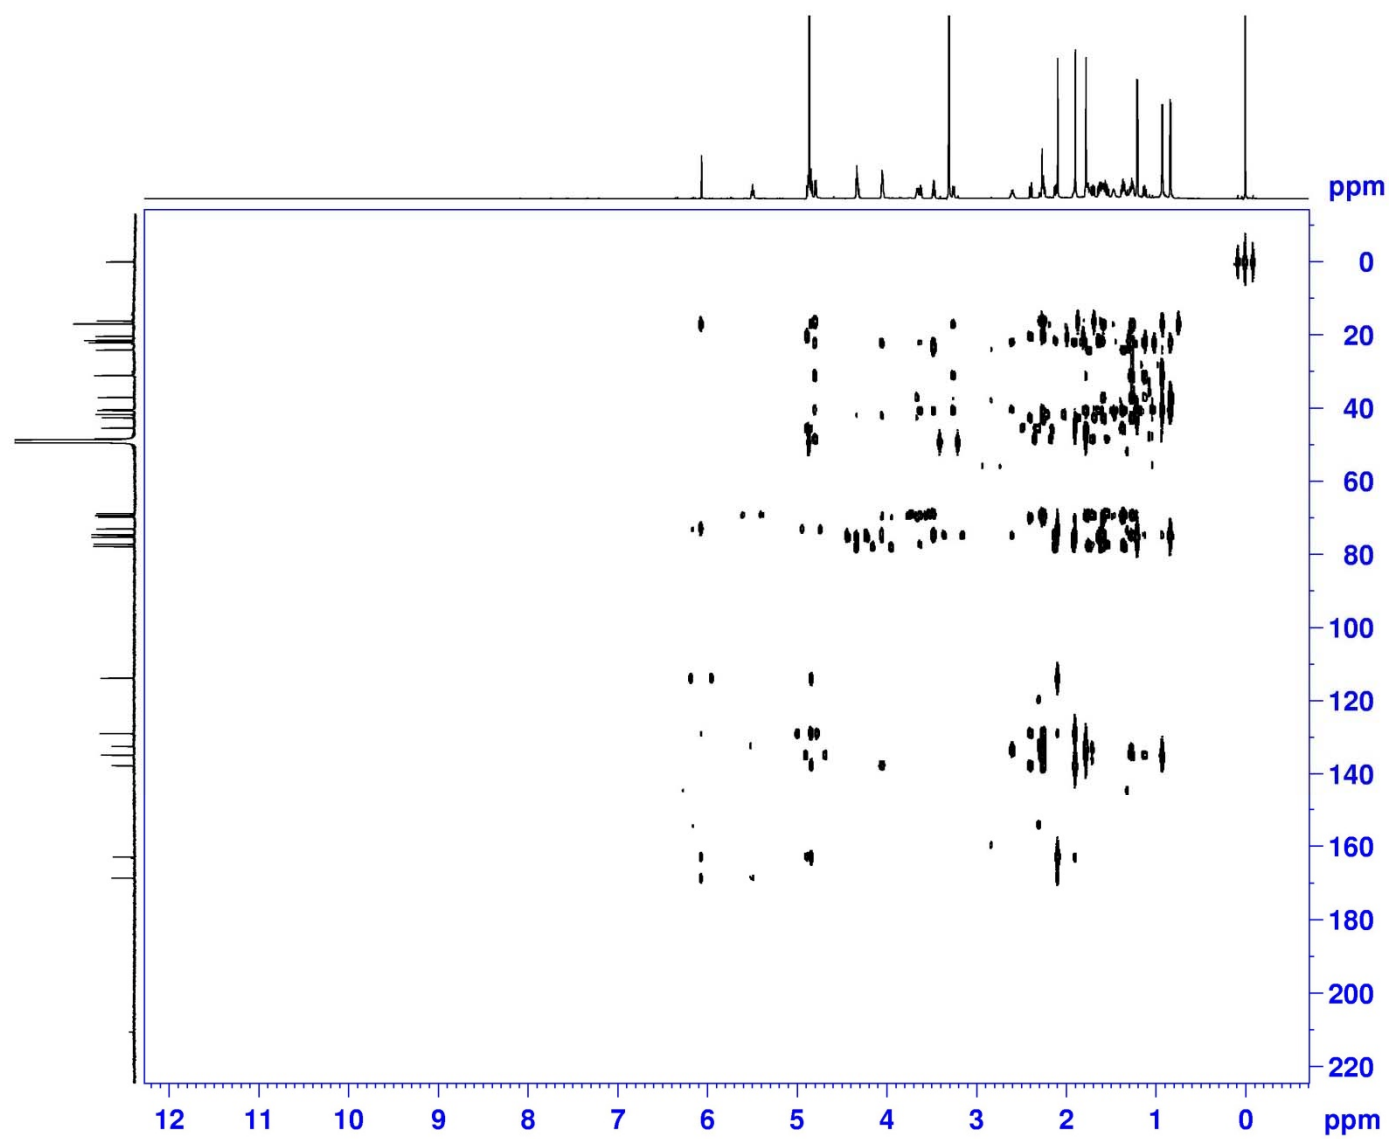

HMBC (700 MHz) spectrum of compound **1** in CD<sub>3</sub>OD

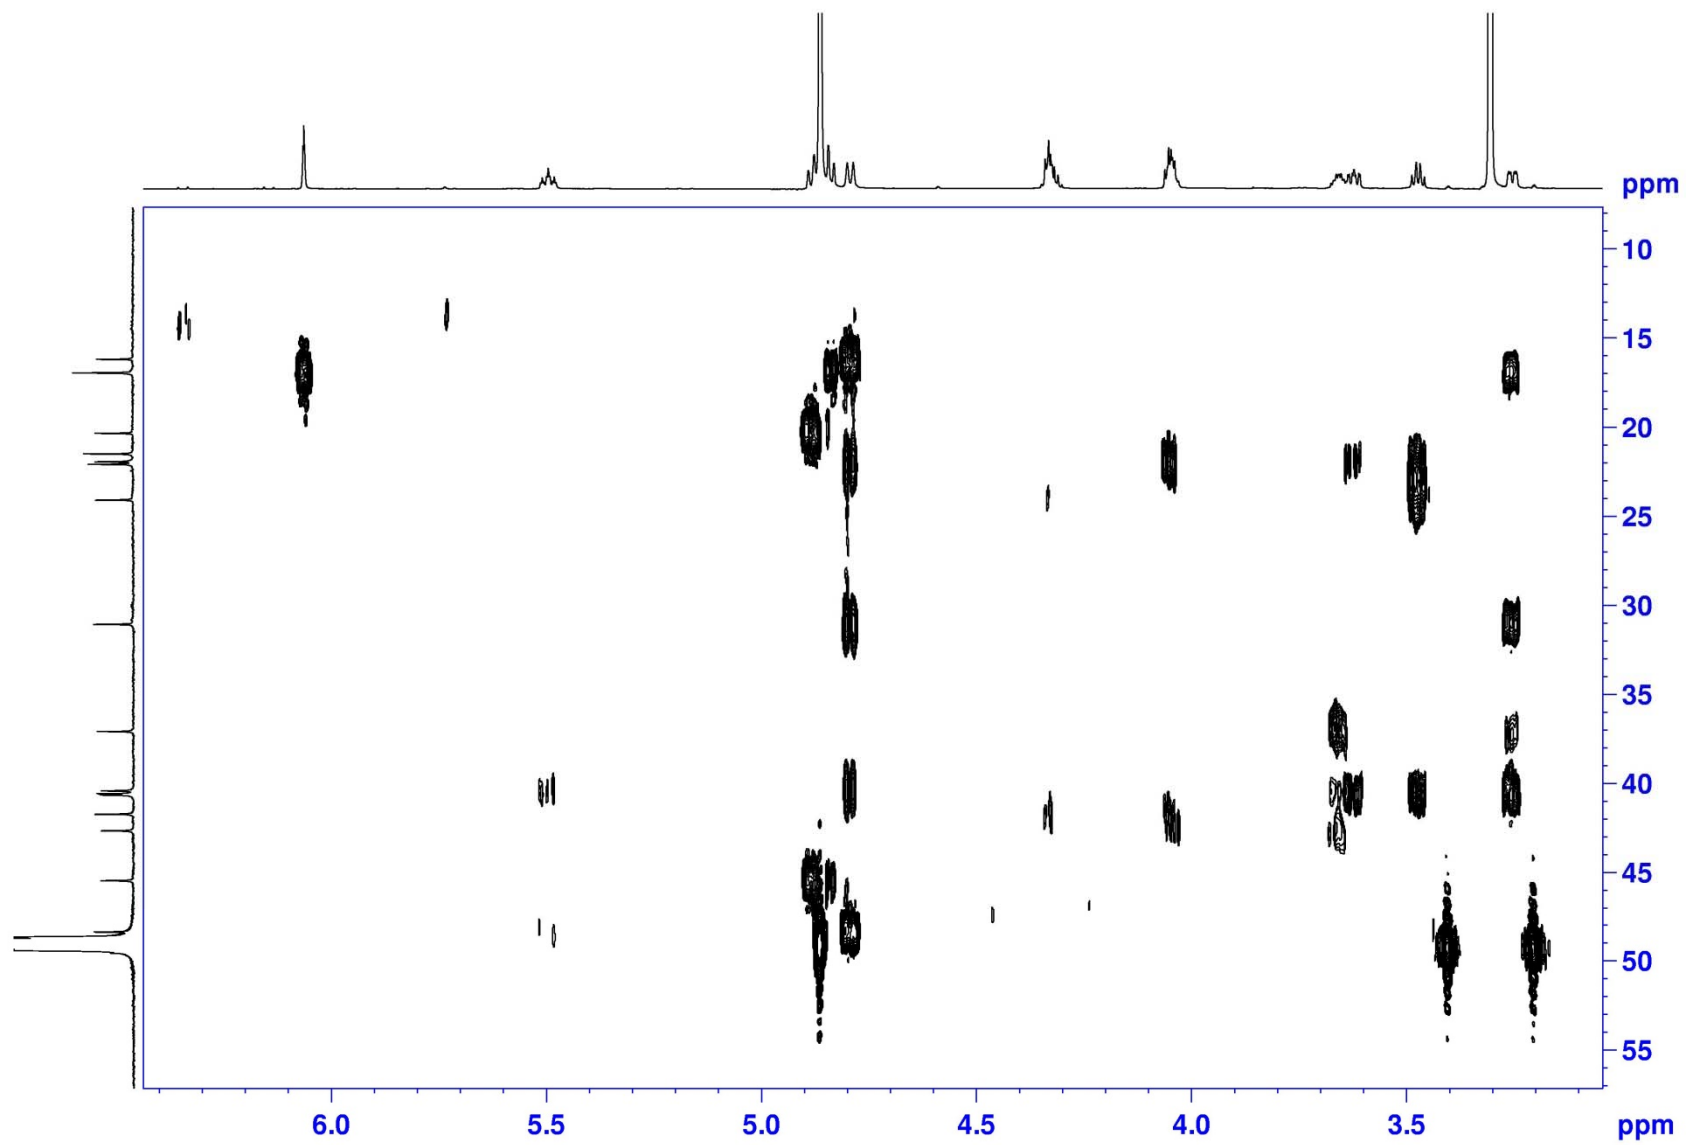

HMBC (700 MHz) spectrum of compound **1** in CD<sub>3</sub>OD

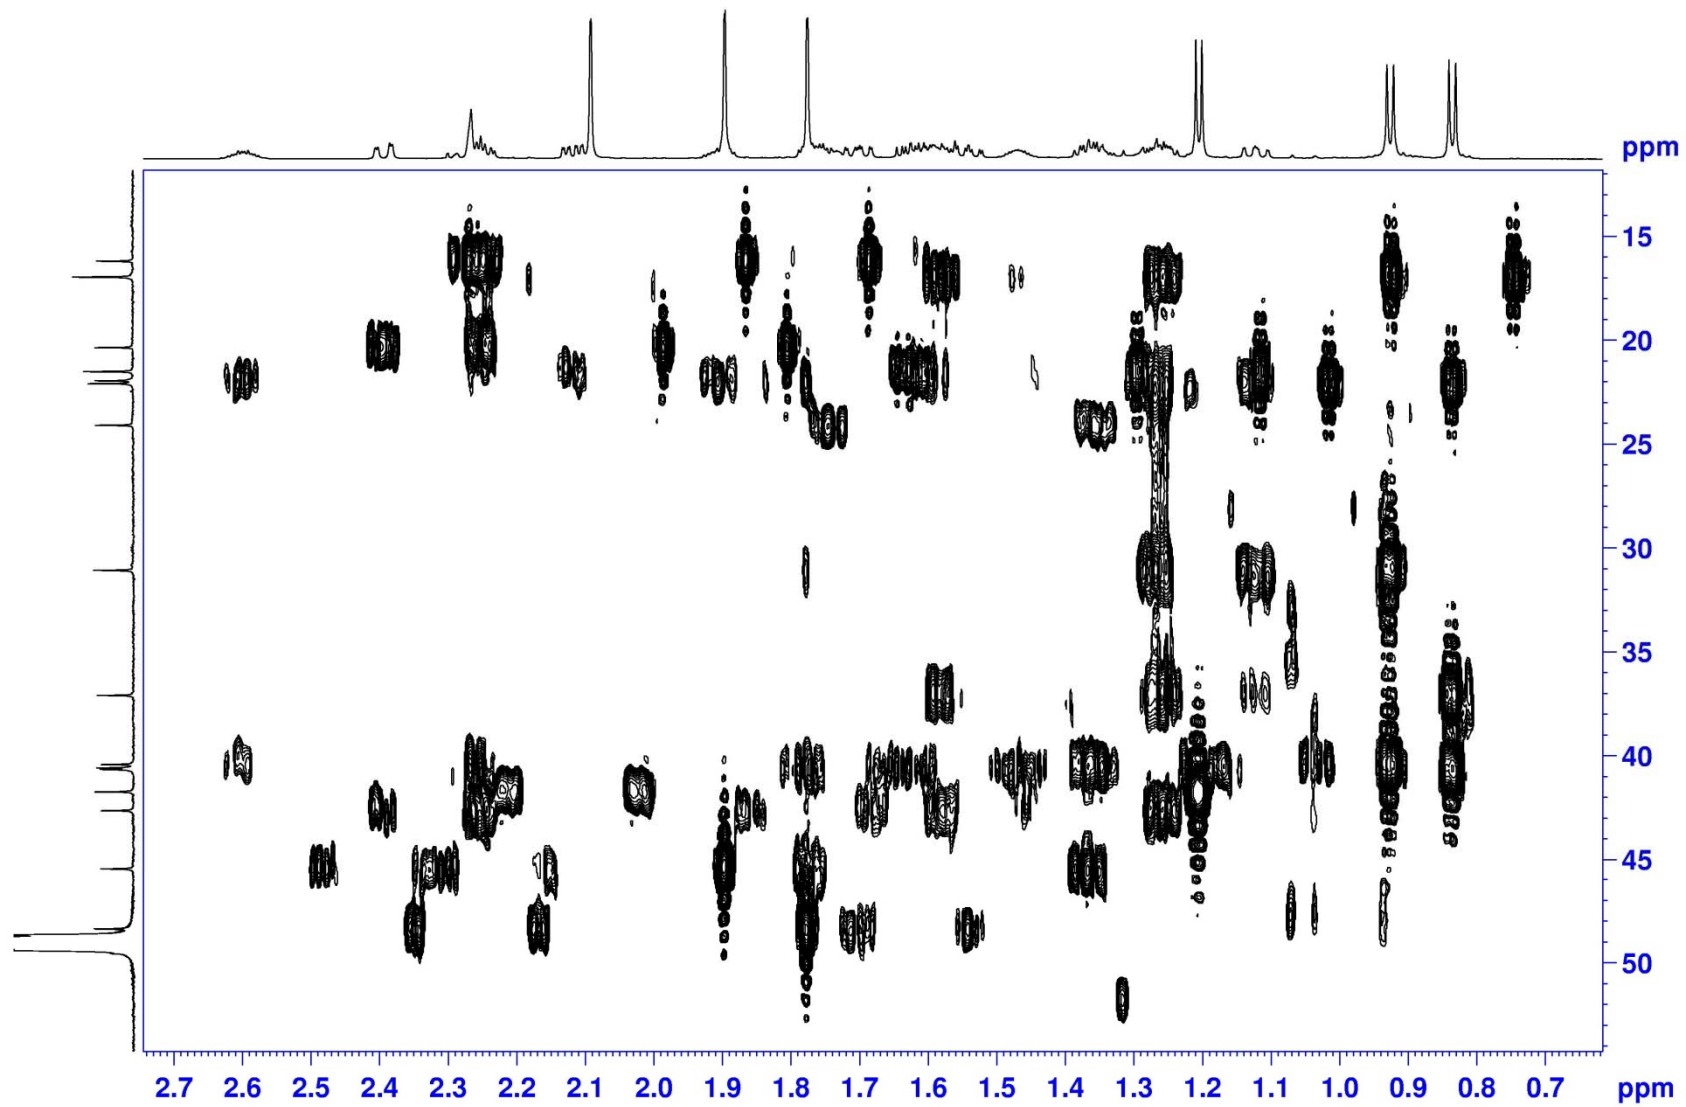

HMBC (700 MHz) spectrum of compound **1** in CD<sub>3</sub>OD

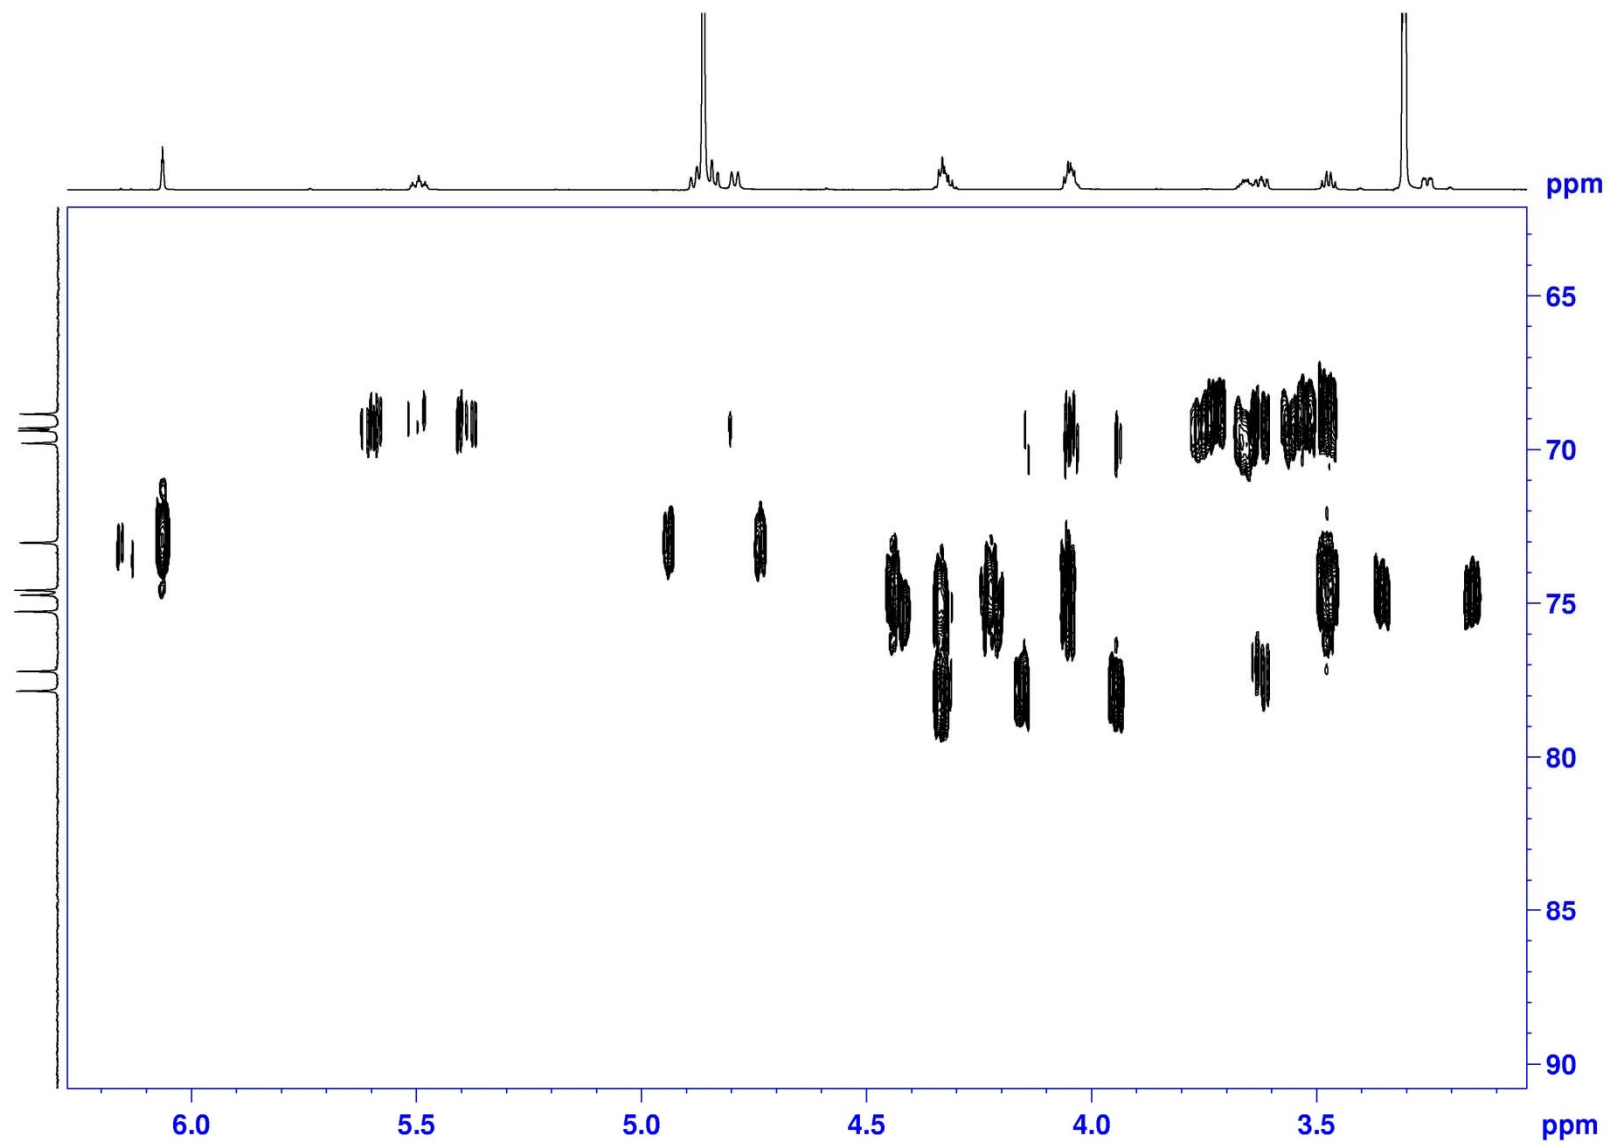



HMBC (700 MHz) spectrum of compound **1** in CD<sub>3</sub>OD

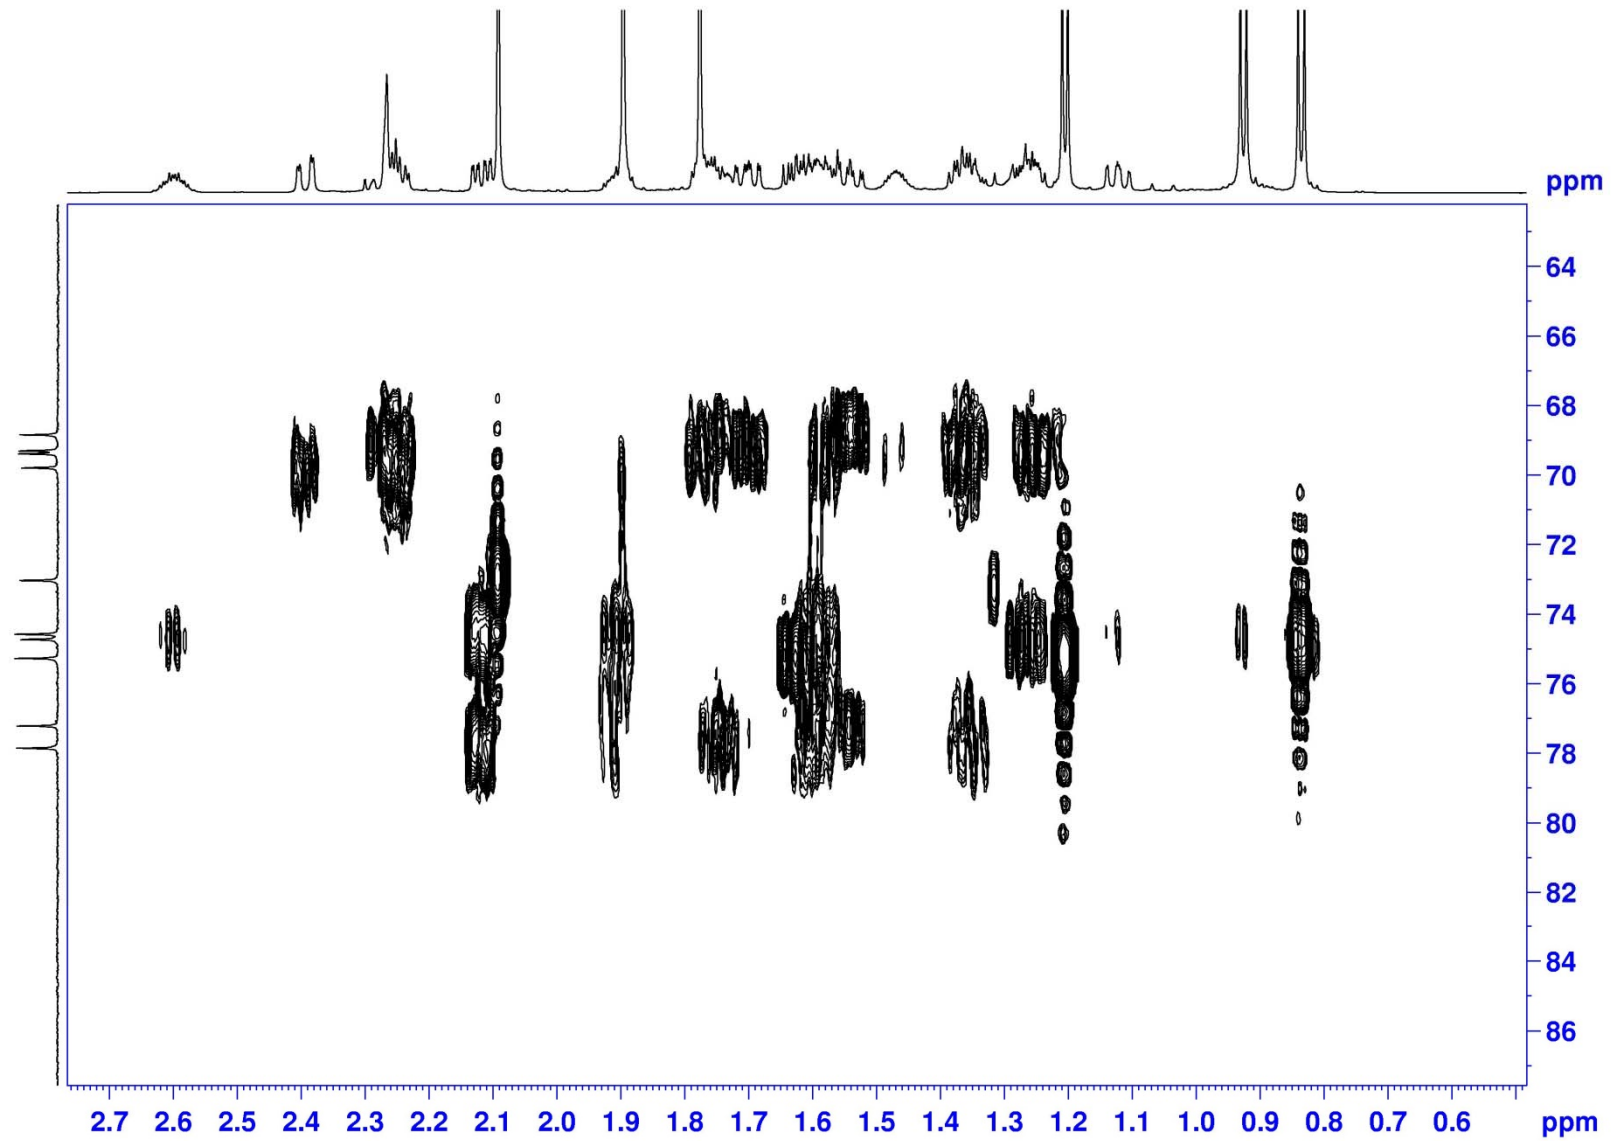

HMBC (700 MHz) spectrum of compound **1** in CD<sub>3</sub>OD

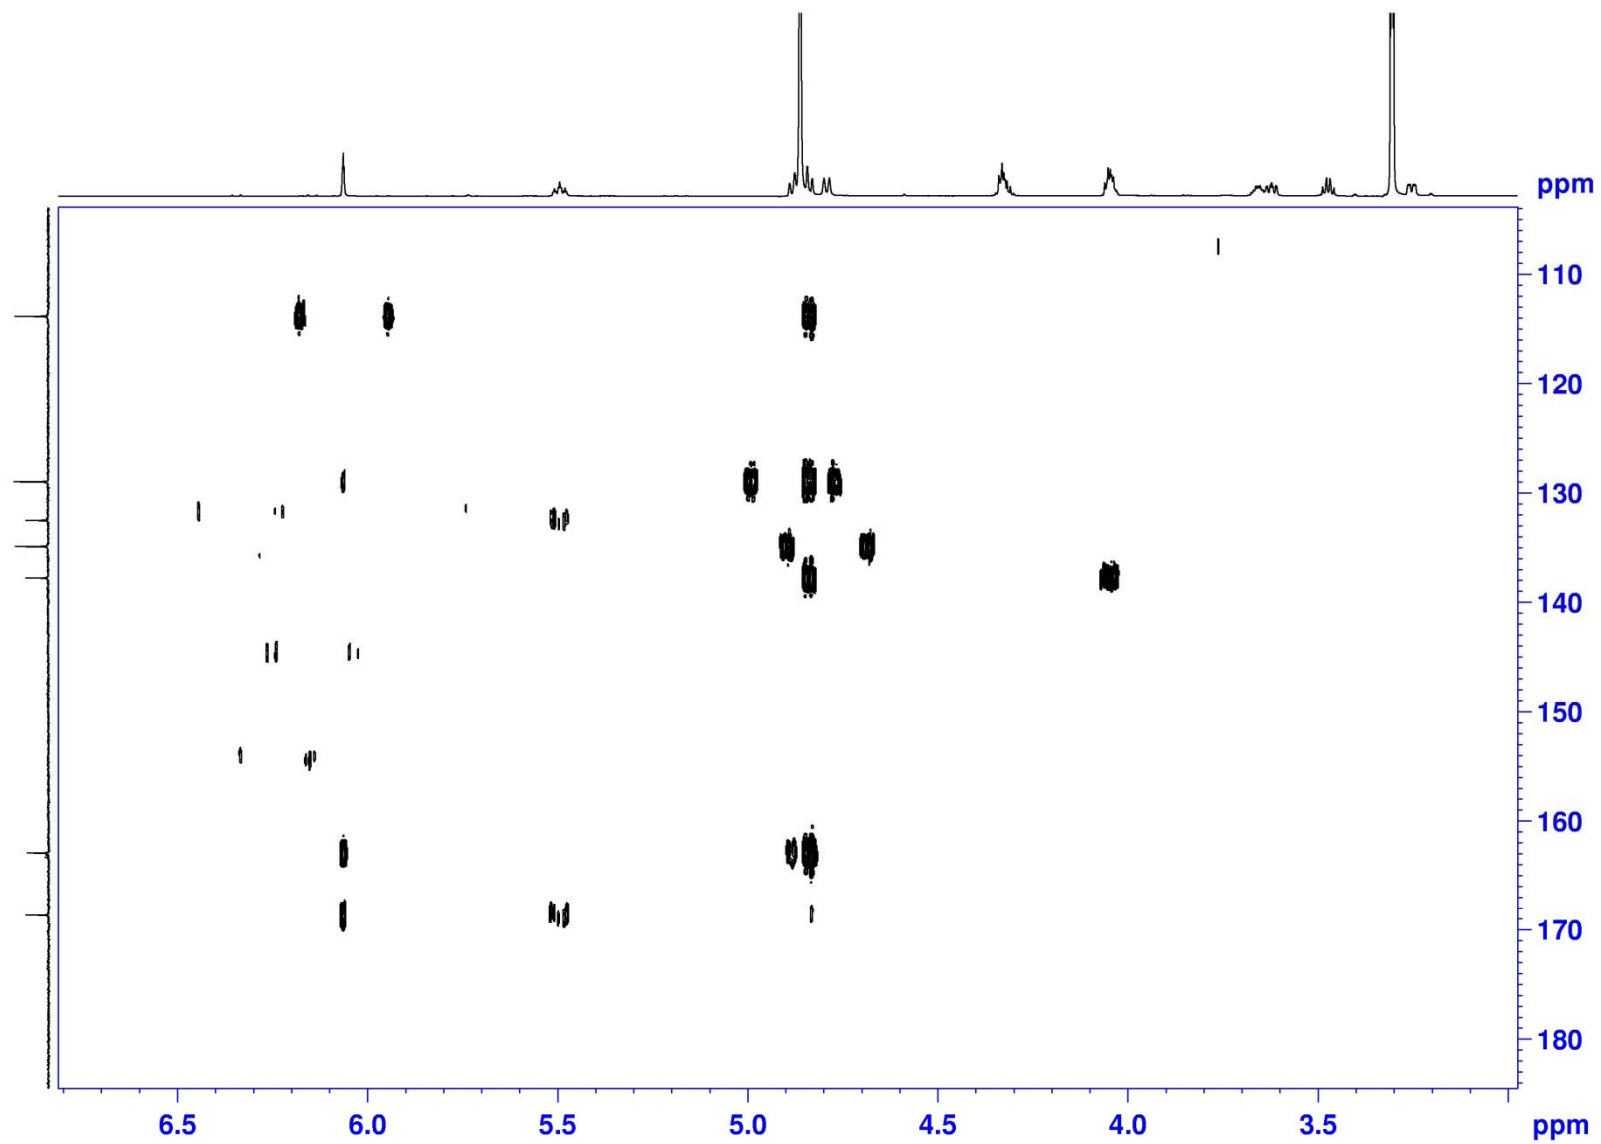

HMBC (700 MHz) spectrum of compound **1** in CD<sub>3</sub>OD

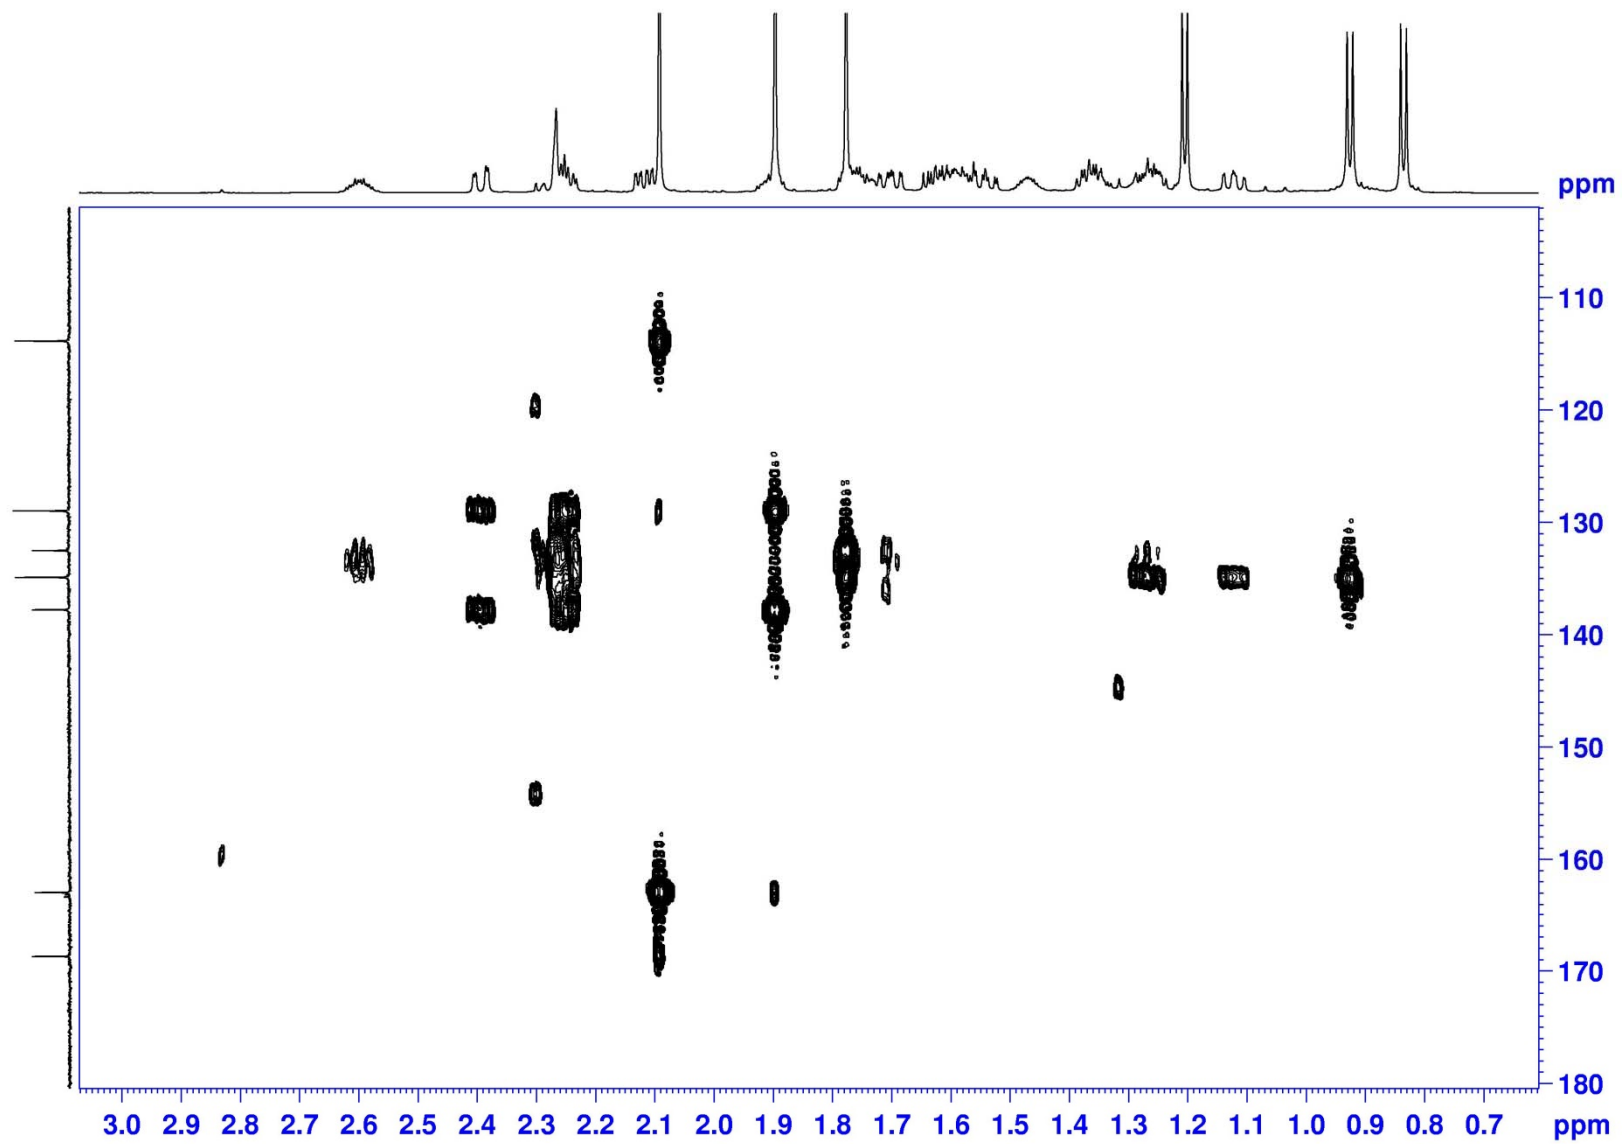

NOESY (700 MHz) spectrum of compound **1** in CD<sub>3</sub>OD

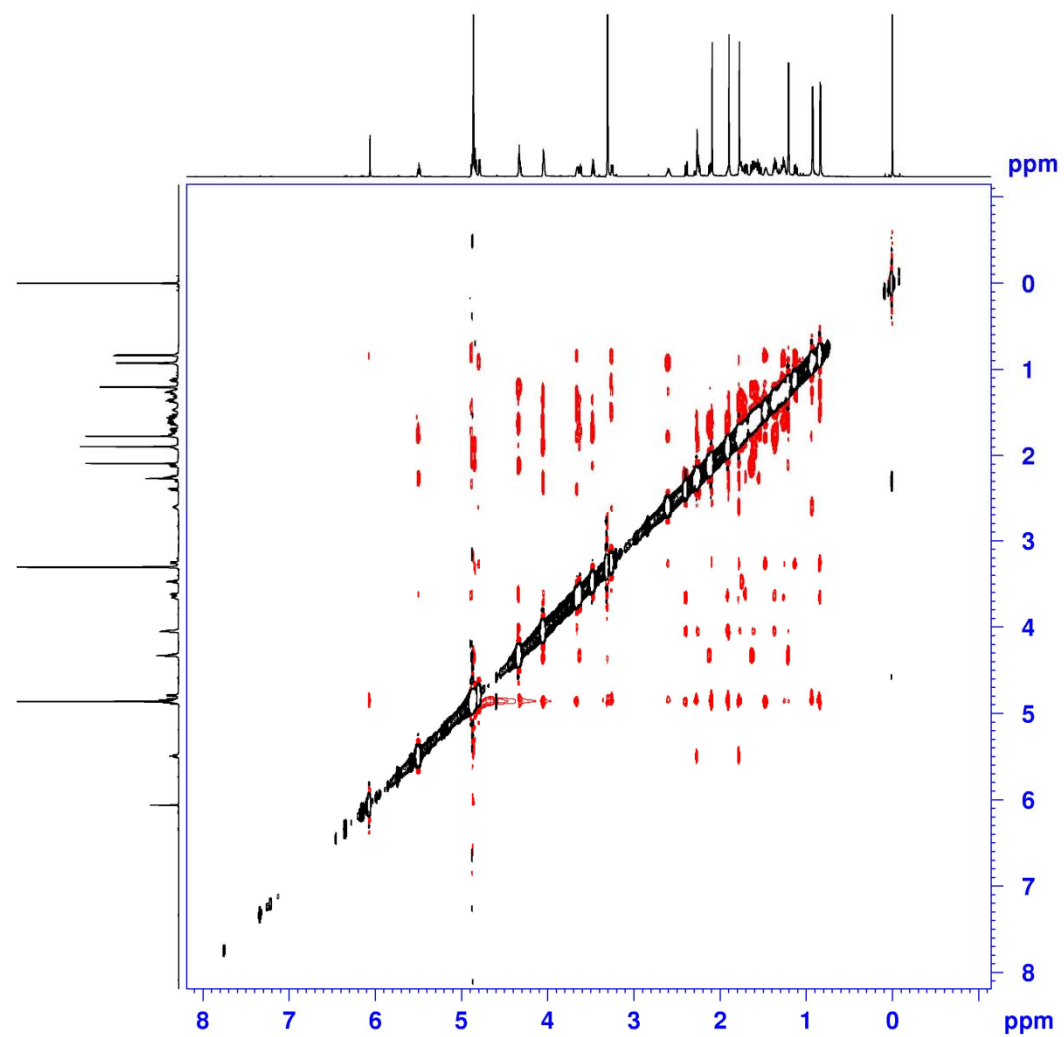

NOESY (700 MHz) spectrum of compound **1** in CD<sub>3</sub>OD

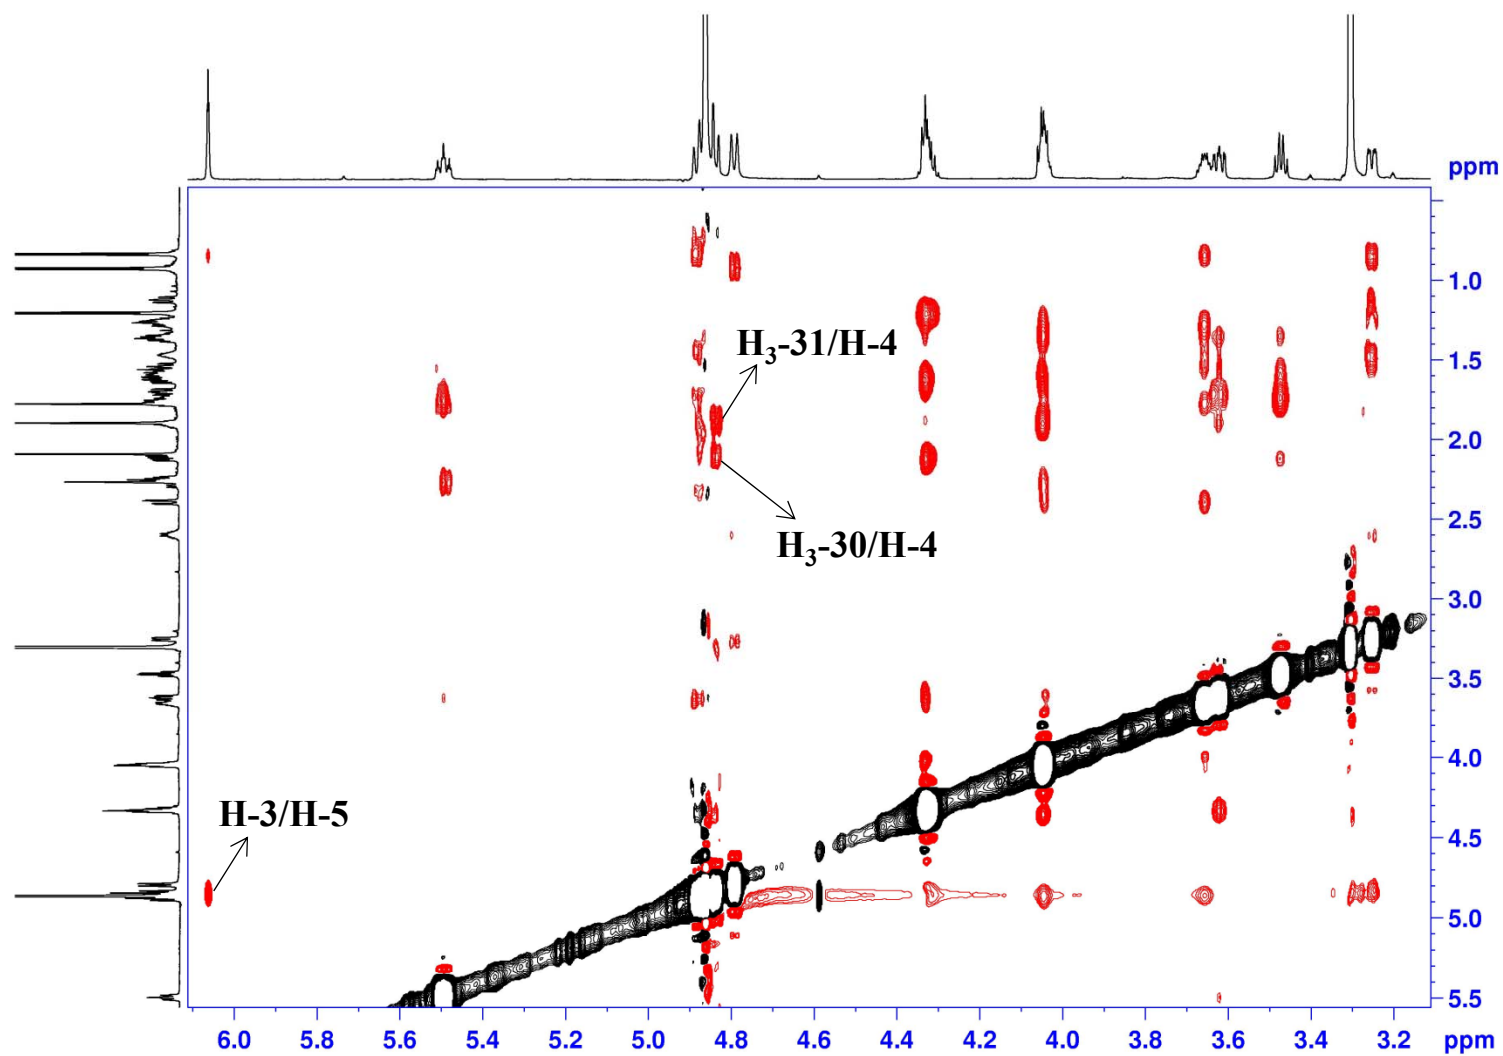

NOESY (700 MHz) spectrum of compound **1** in CD<sub>3</sub>OD

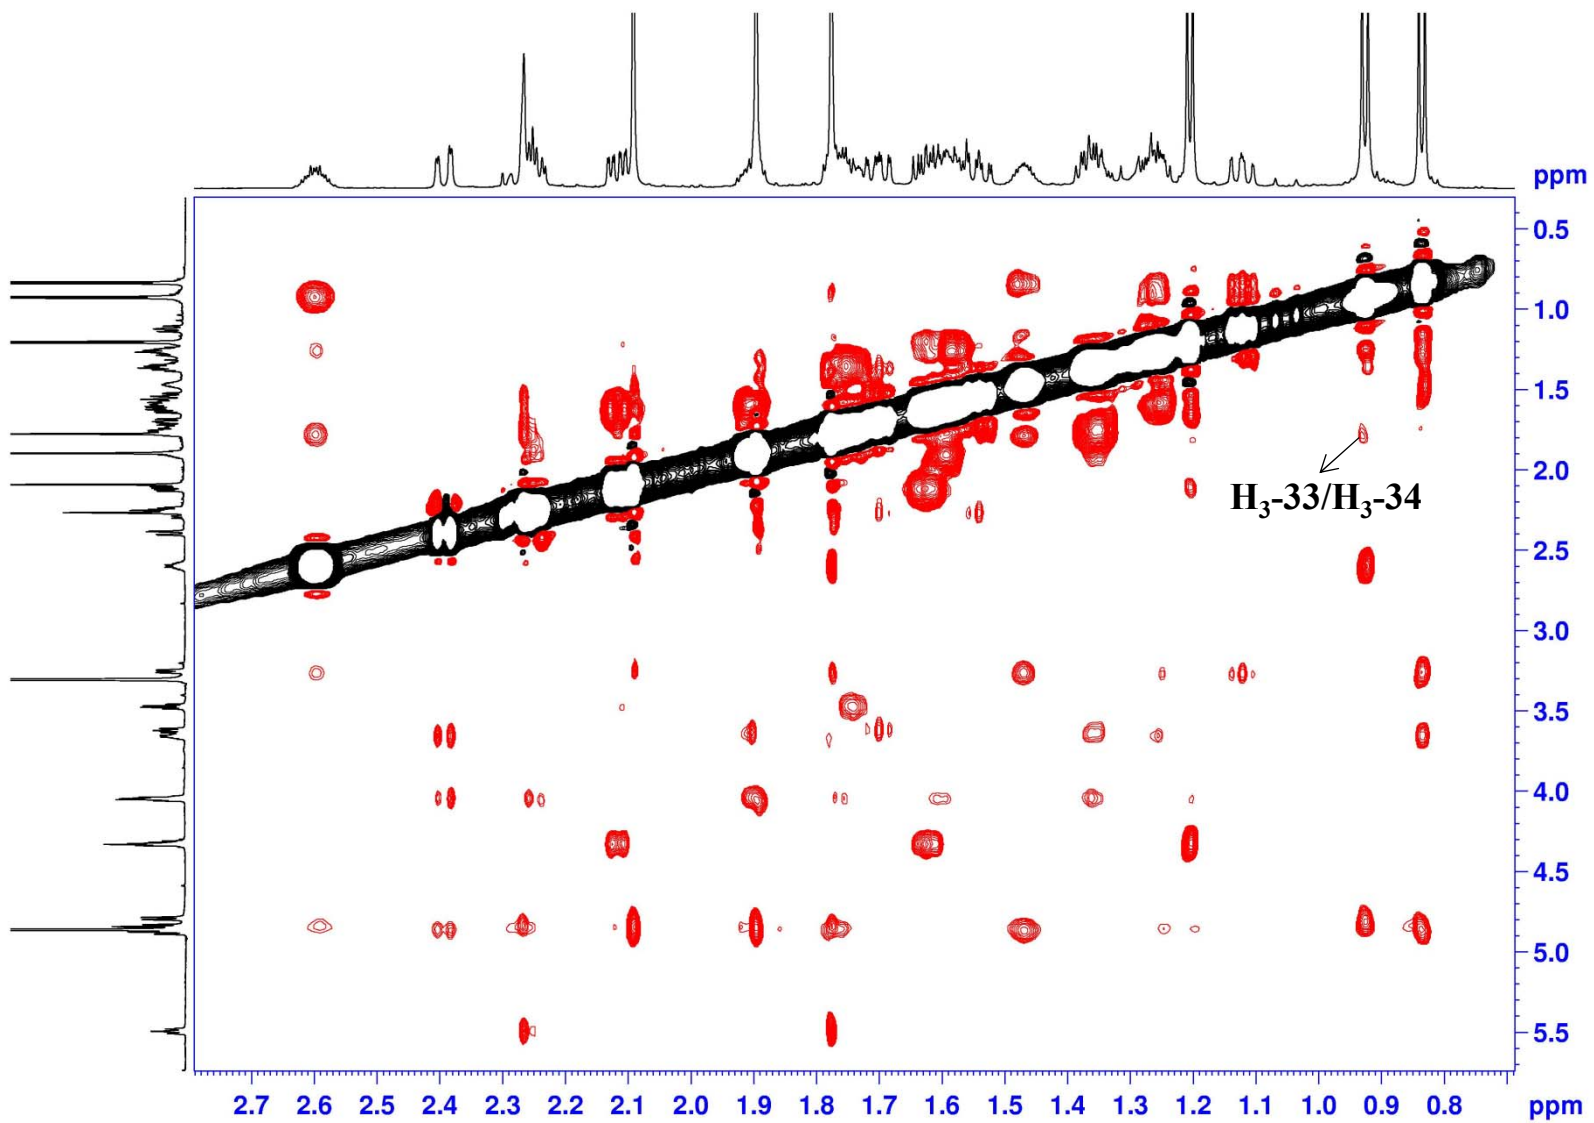

NOESY (700 MHz) spectrum of compound **1** in CD<sub>3</sub>OD

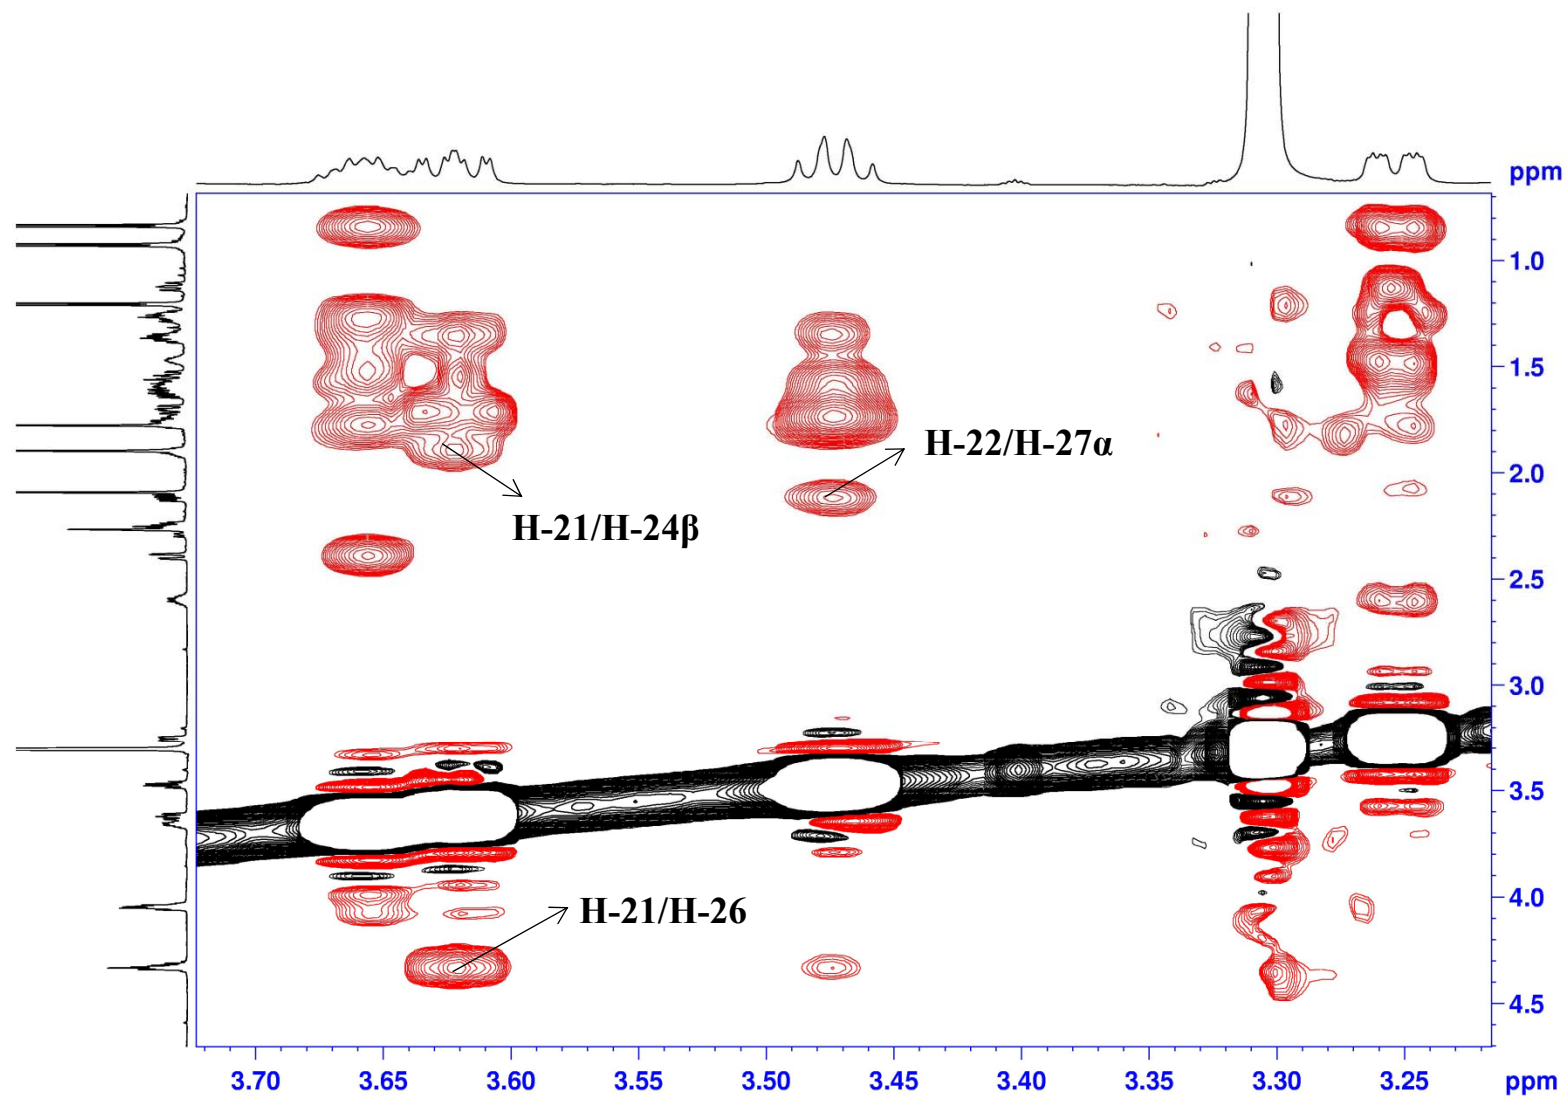

NOESY (700 MHz) spectrum of compound **1** in CD<sub>3</sub>OD

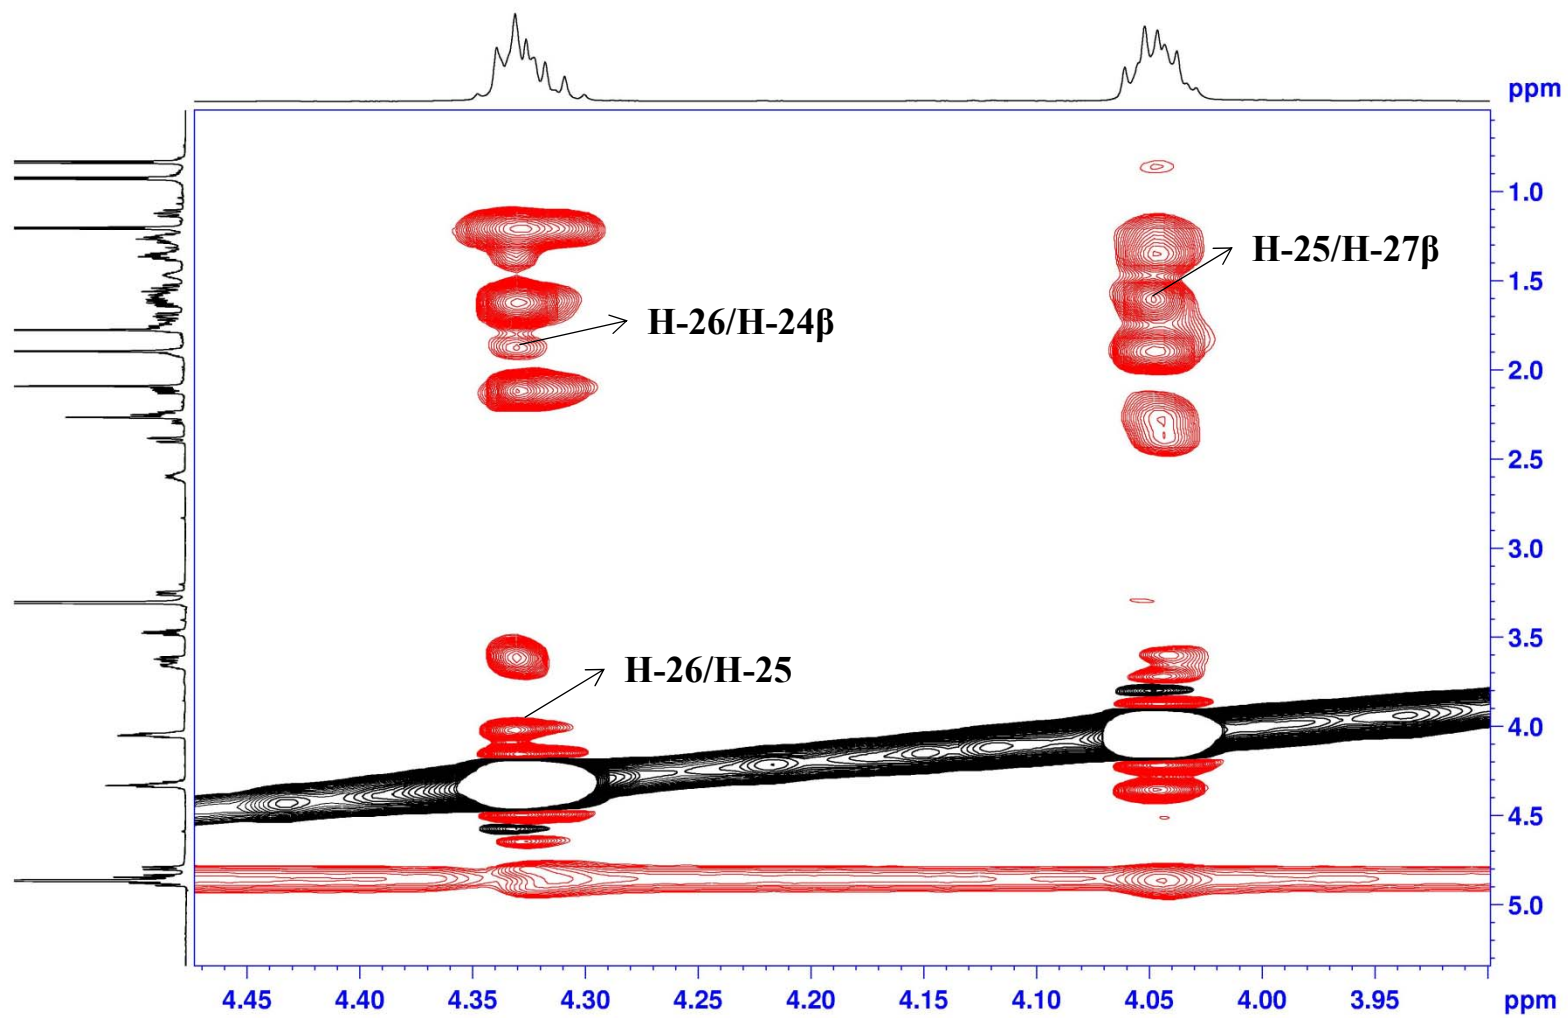



NOESY (700 MHz) spectrum of compound **1** in CD<sub>3</sub>OD

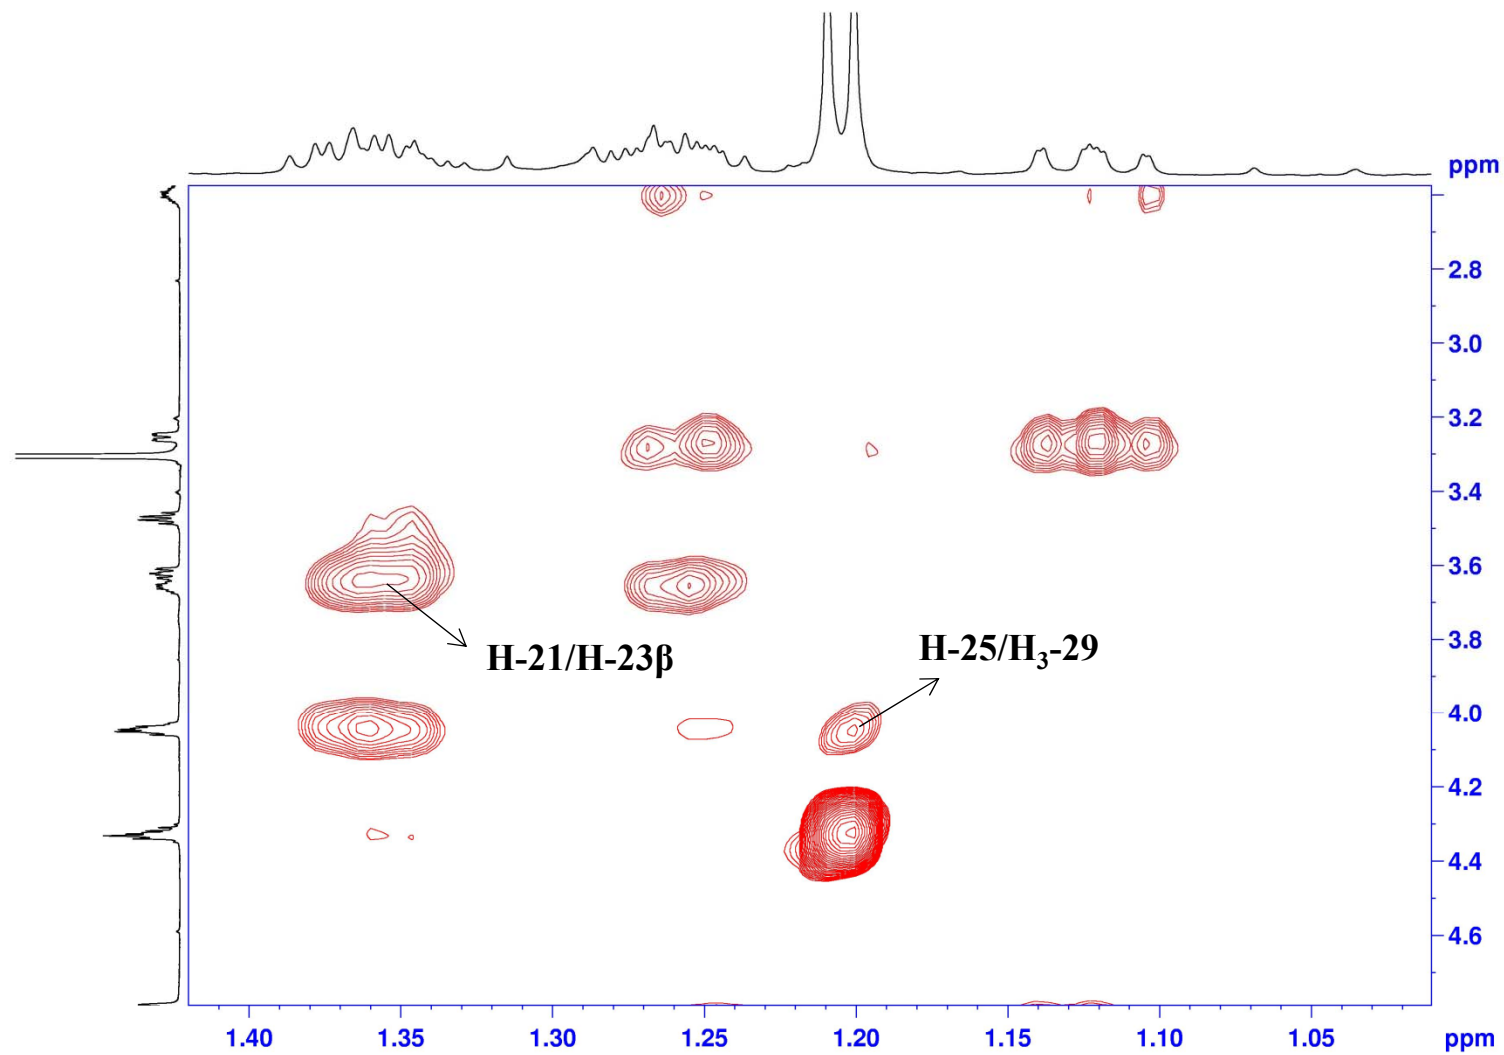

2D JRES (700 MHz) spectrum of compound **1** in CD<sub>3</sub>OD

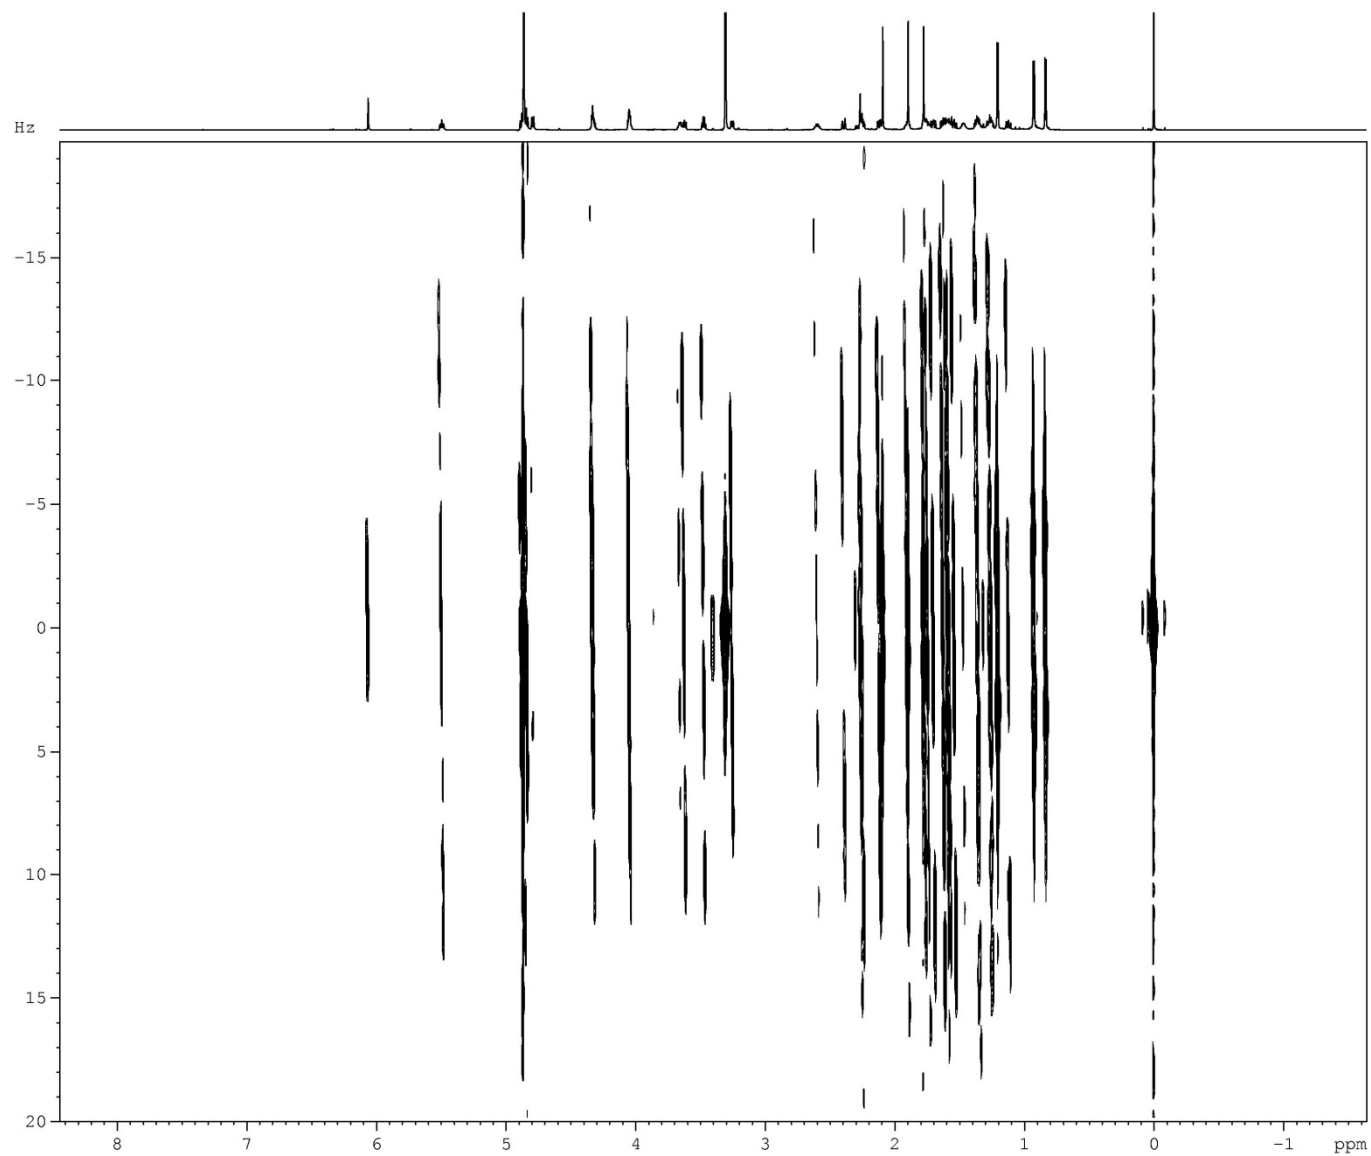

2D JRES (700 MHz) spectrum of compound **1** in CD<sub>3</sub>OD

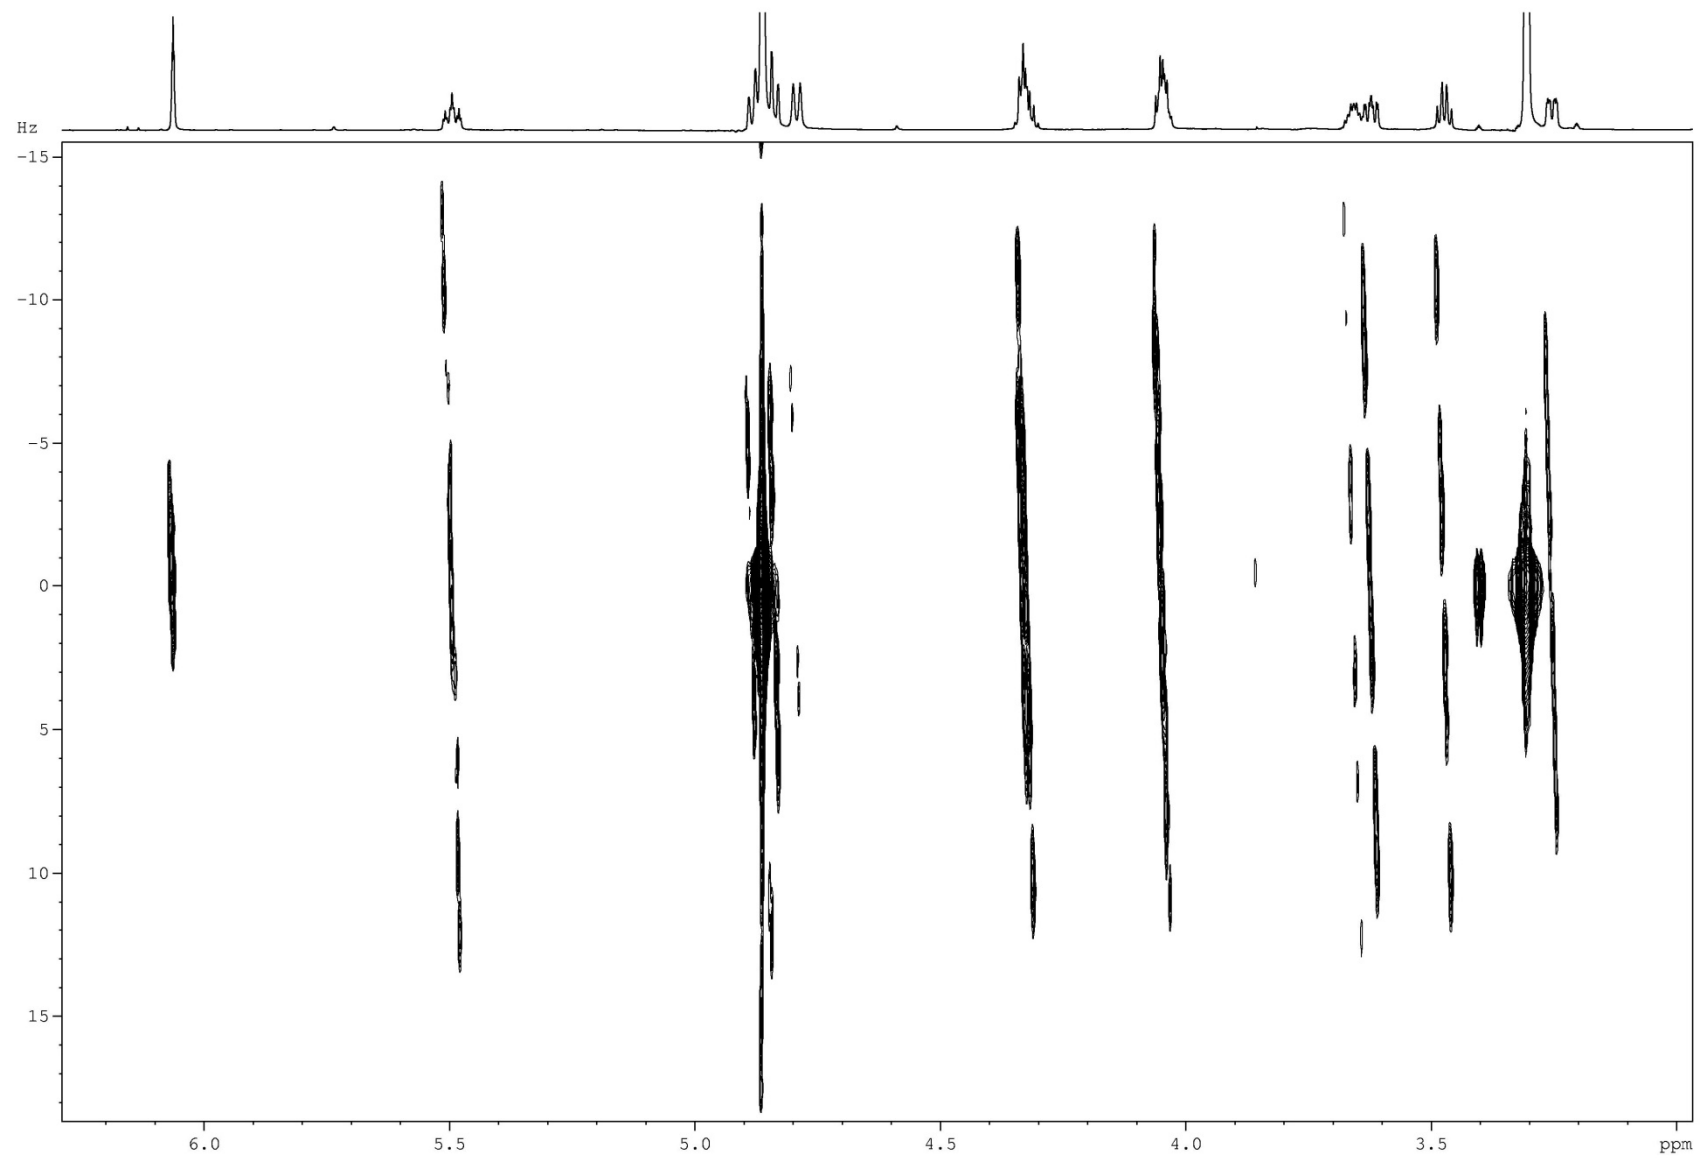

2D JRES (700 MHz) spectrum of compound **1** in CD<sub>3</sub>OD

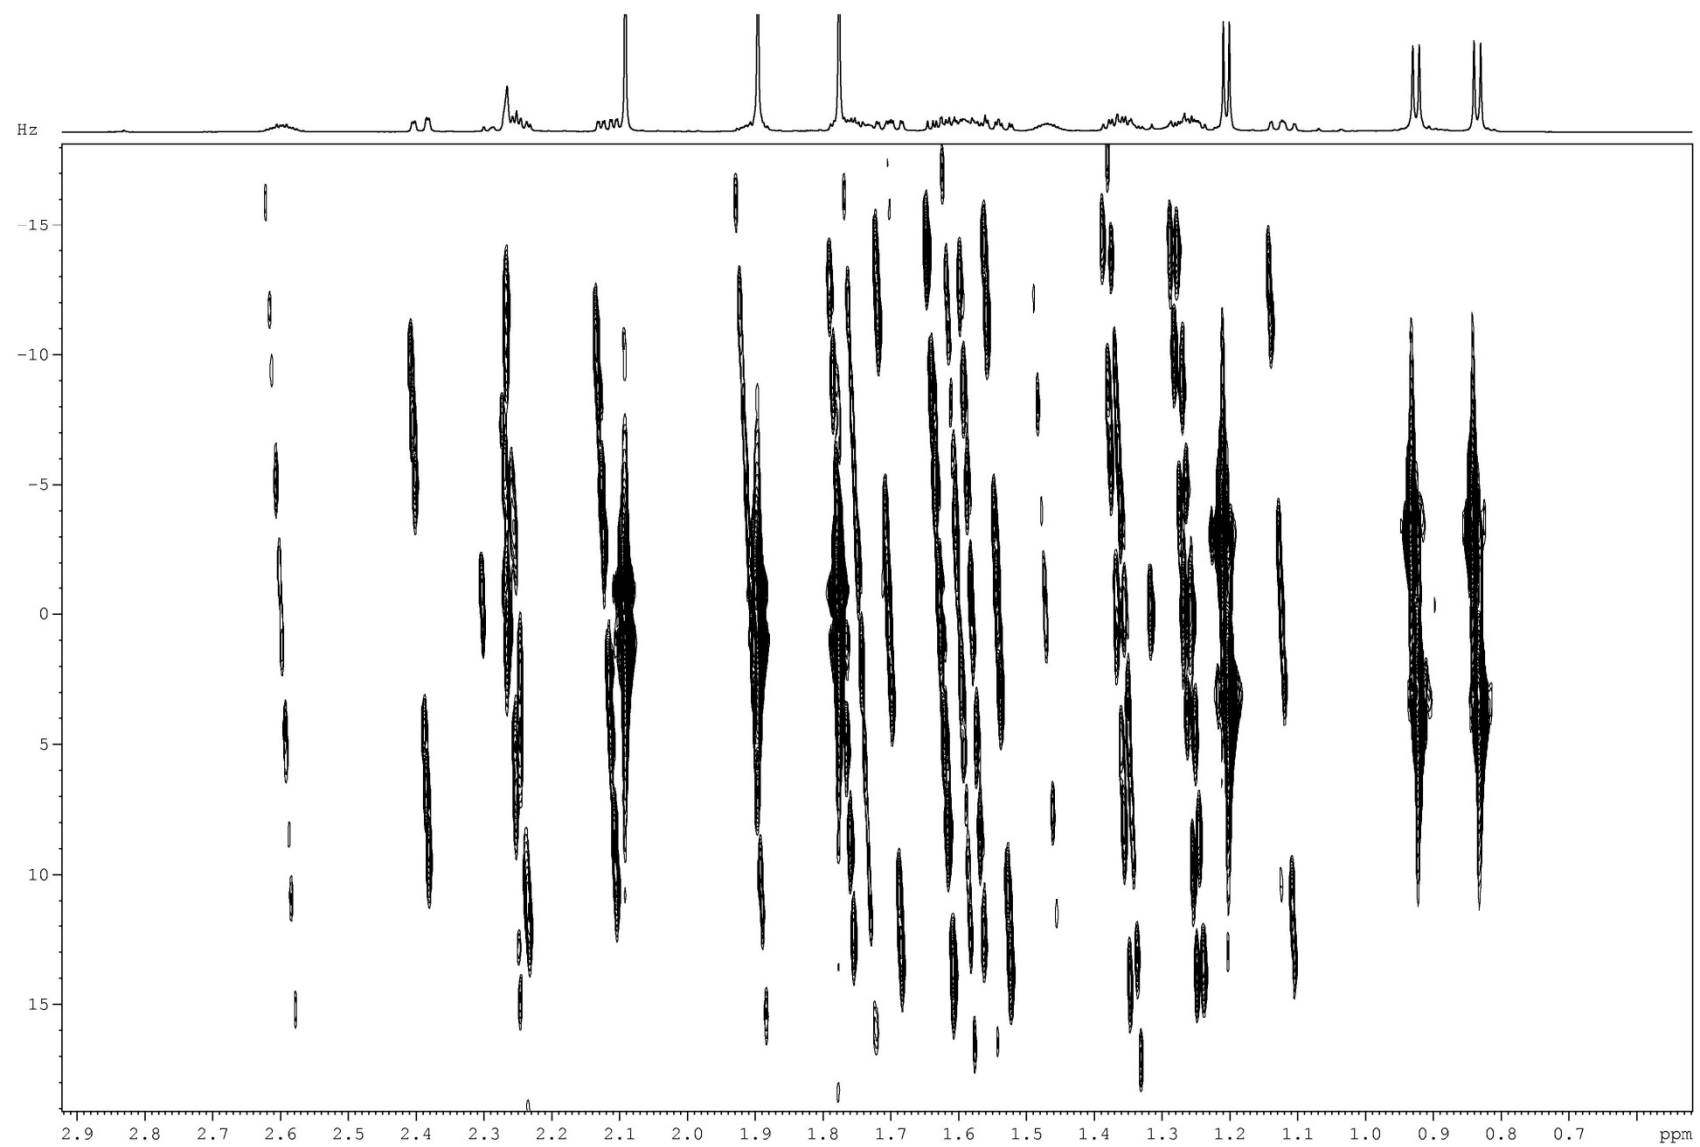

# HETLOC (700 MHz) spectrum of compound **1** in CD<sub>3</sub>OD

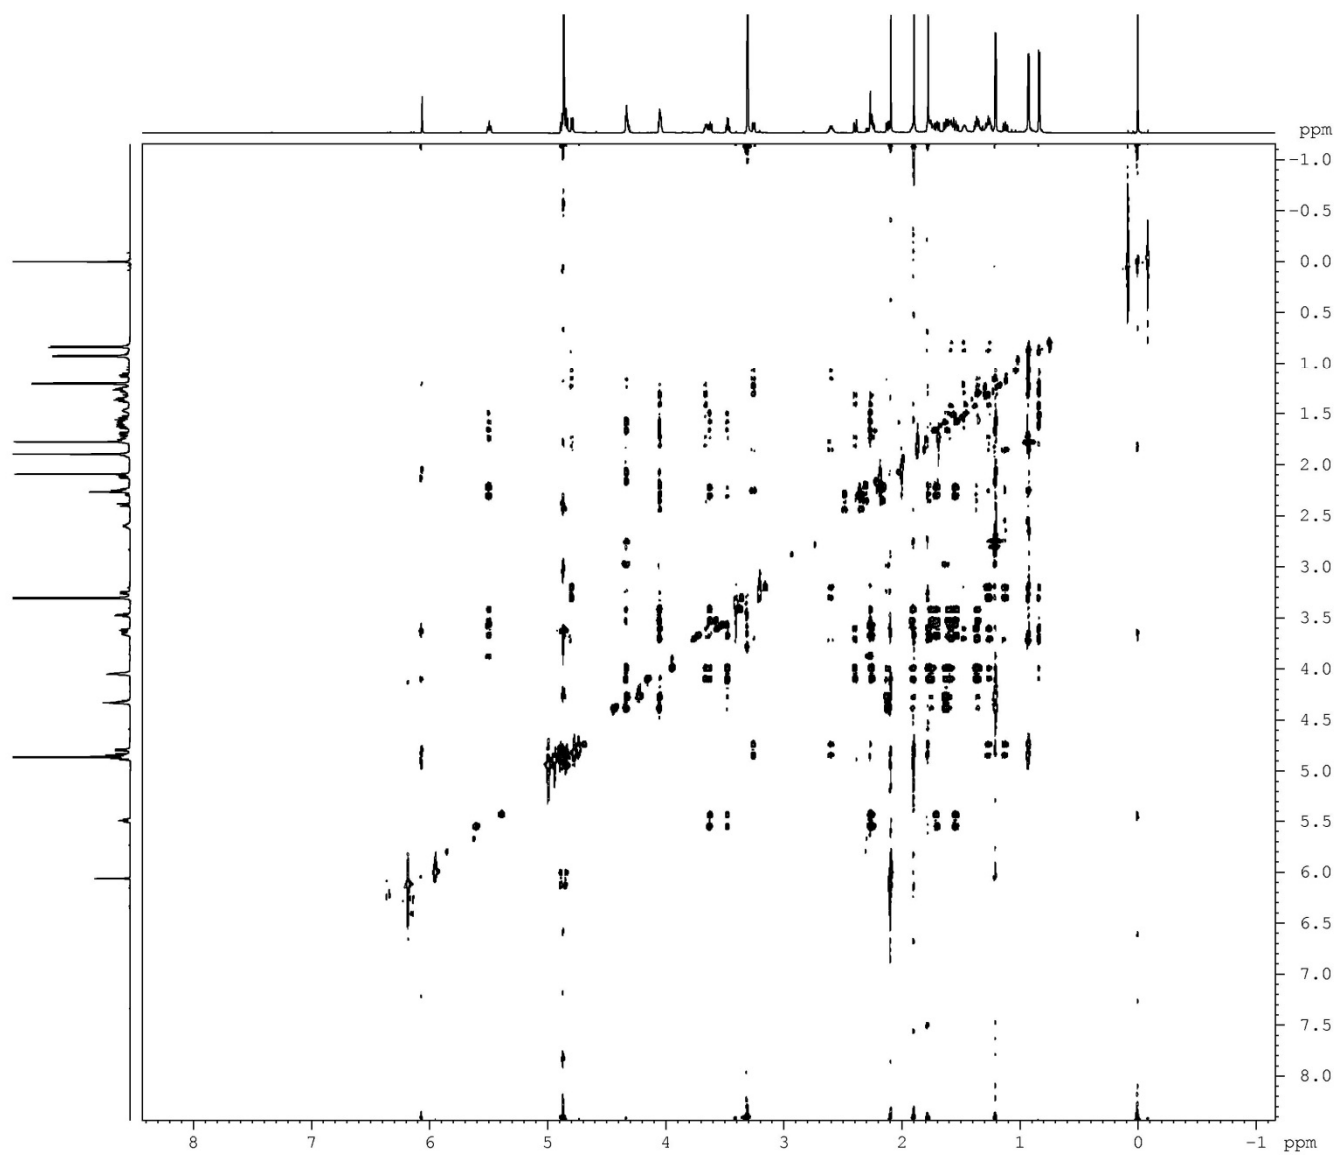

HETLOC (700 MHz) spectrum of compound **1** in CD<sub>3</sub>OD

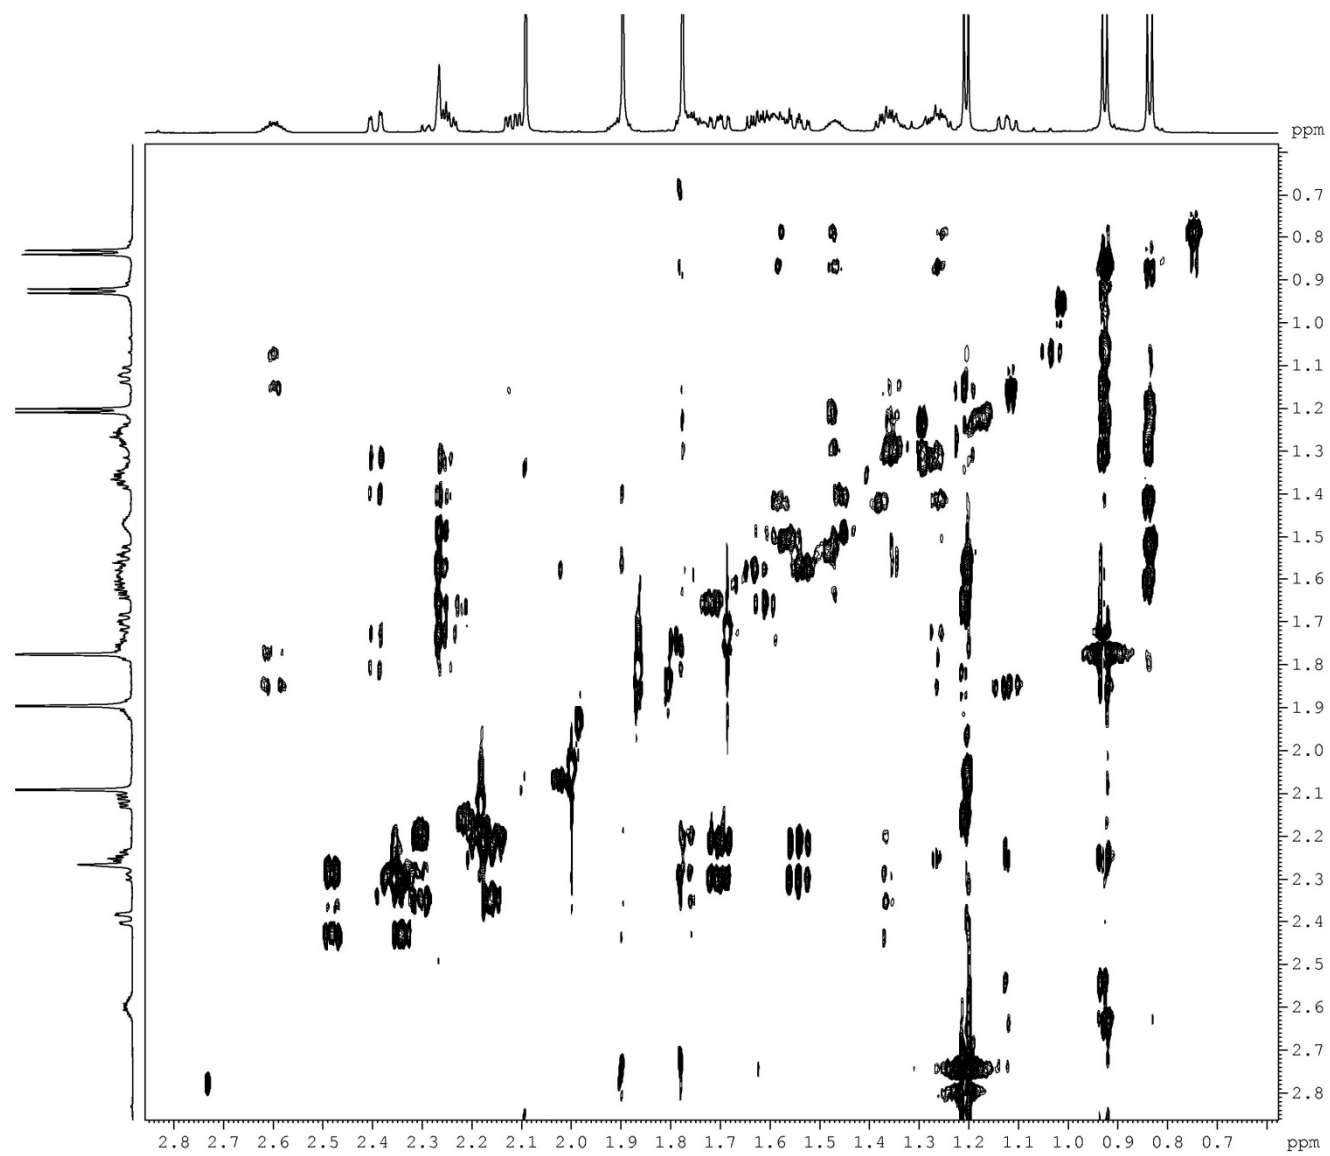

HETLOC (700 MHz) spectrum of compound **1** in CD<sub>3</sub>OD

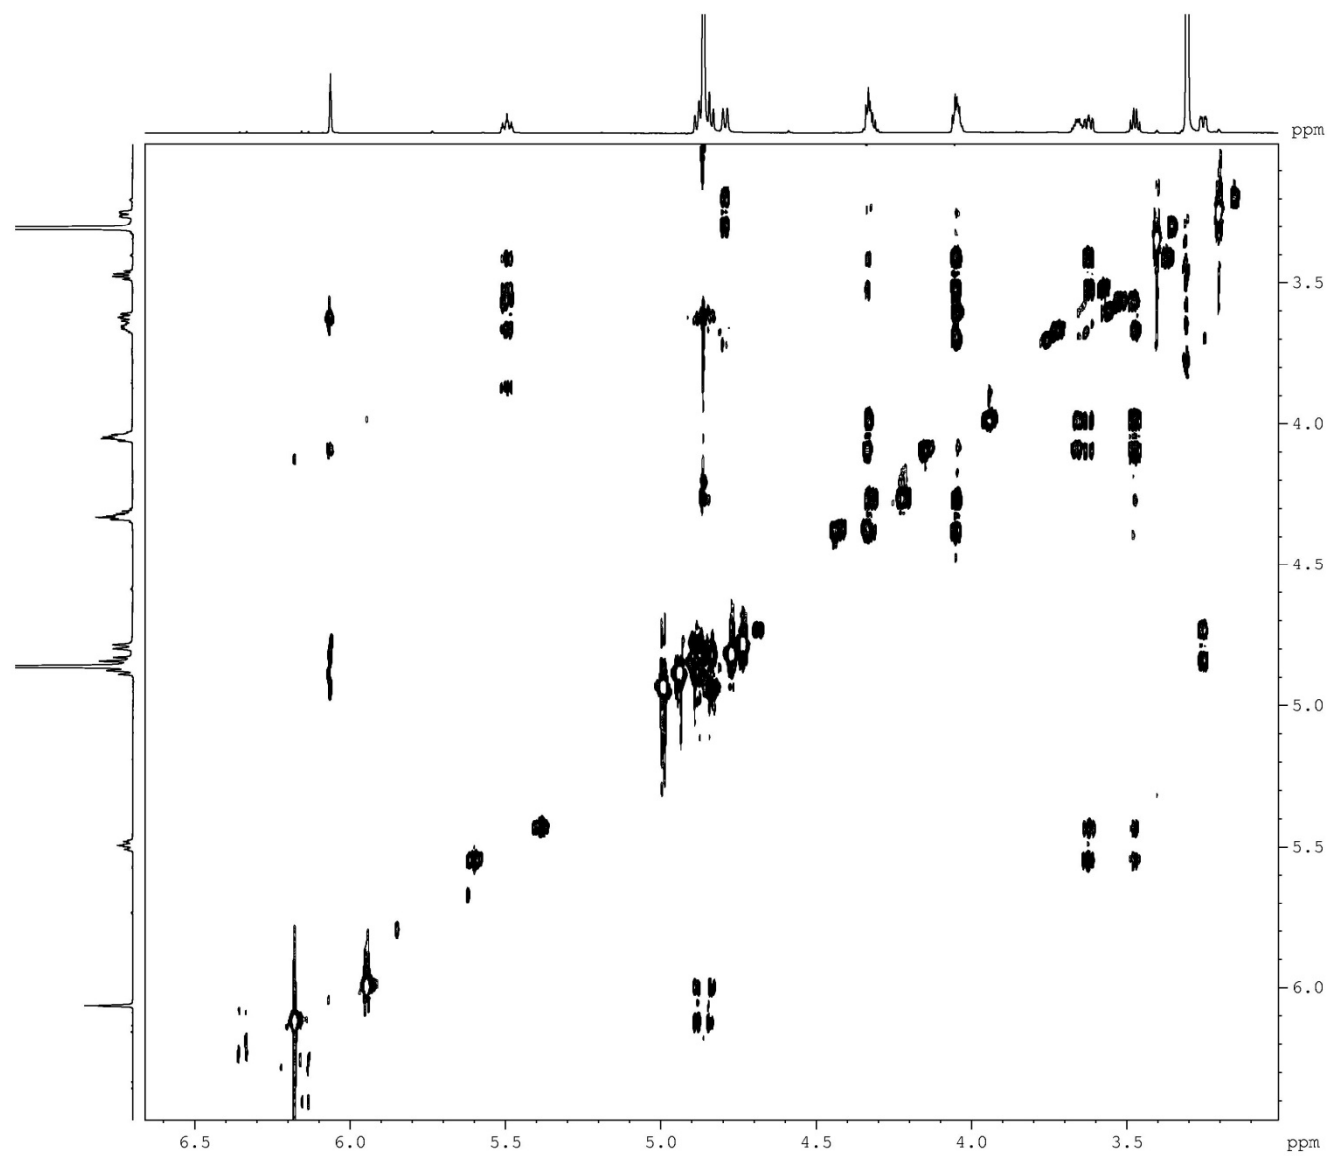

HETLOC (700 MHz) spectrum of compound **1** in CD<sub>3</sub>OD

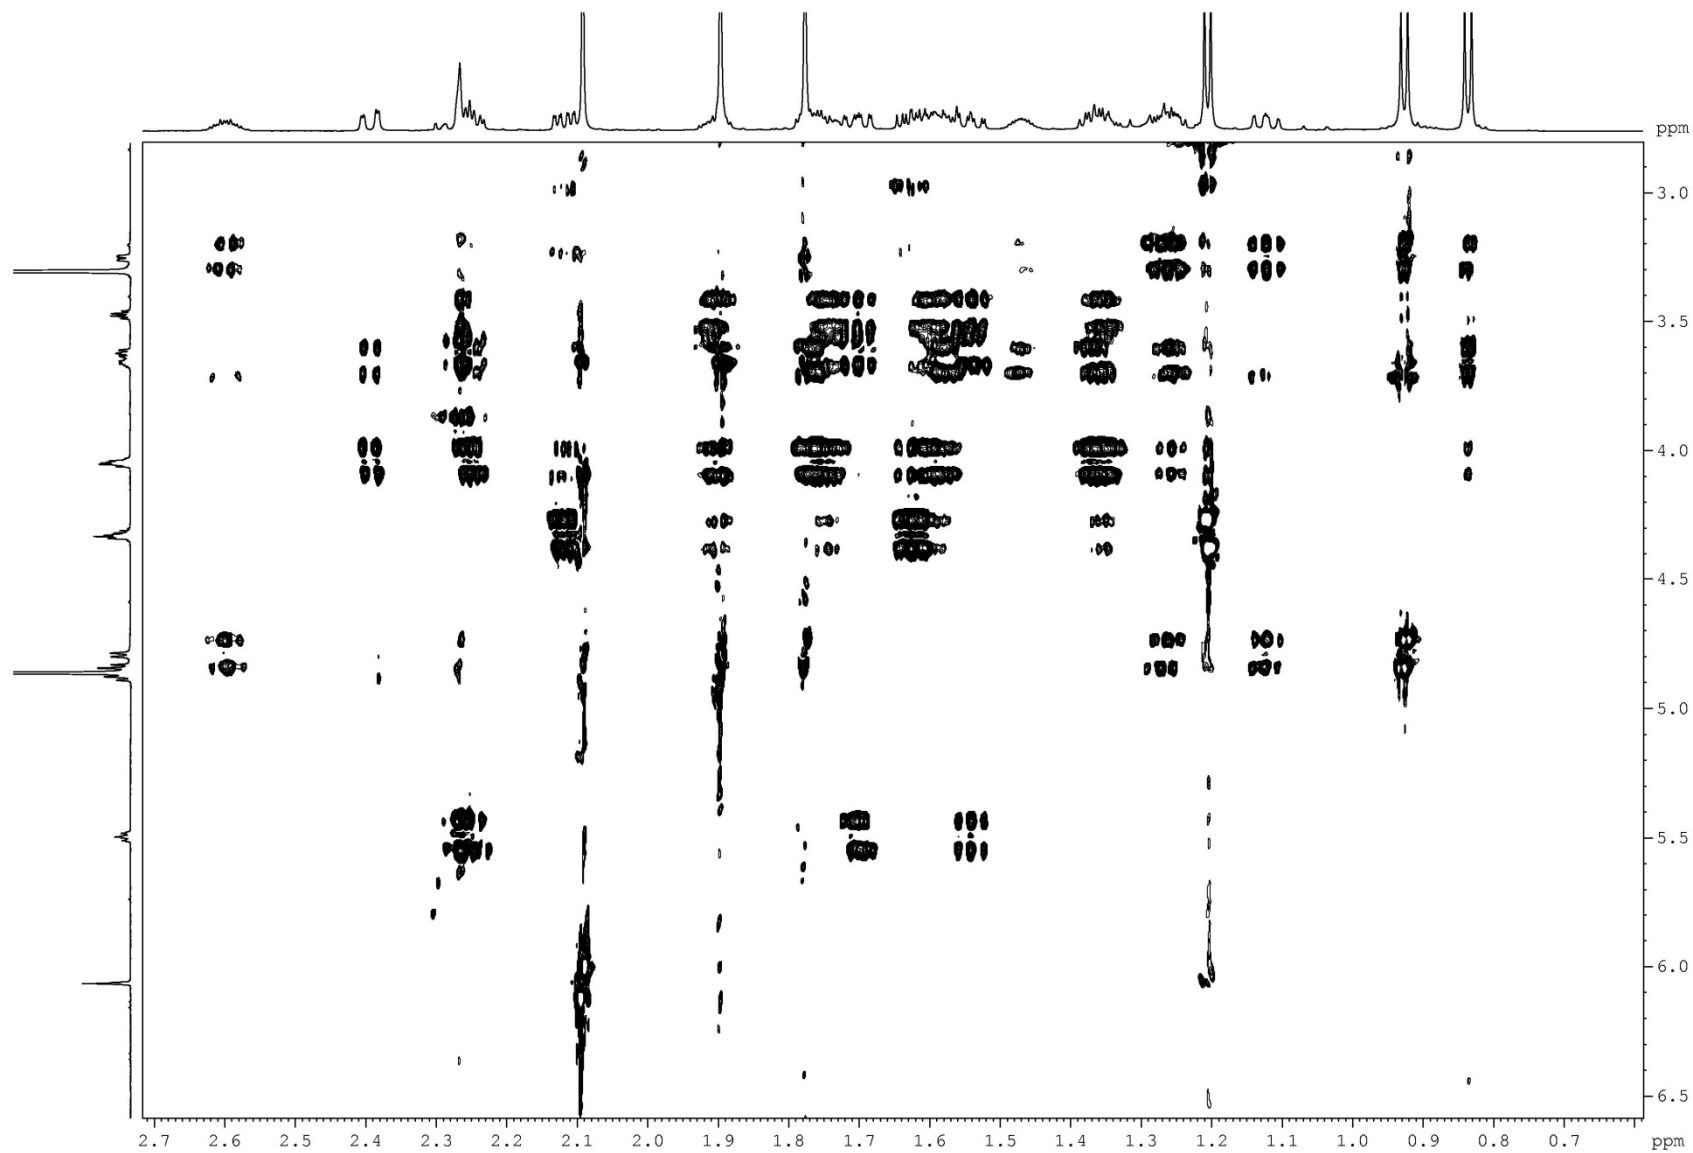



# UV spectrum of compound 1

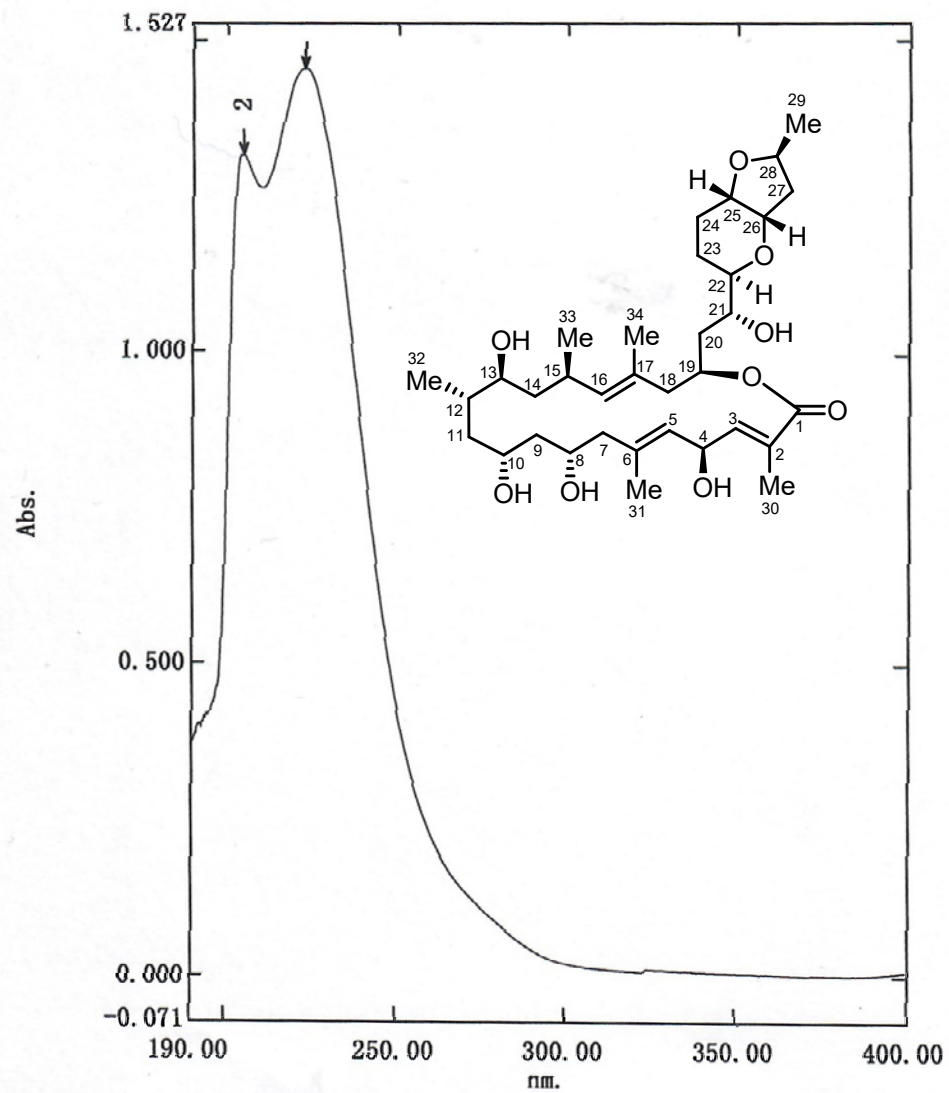

| No. | P/V | (nm)   |       |
|-----|-----|--------|-------|
| 1   | Ⓢ   | 223.20 | 1.455 |
| 2   | Ⓢ   | 204.80 | 1.312 |

# LR-ESIMS for the fragment 1A

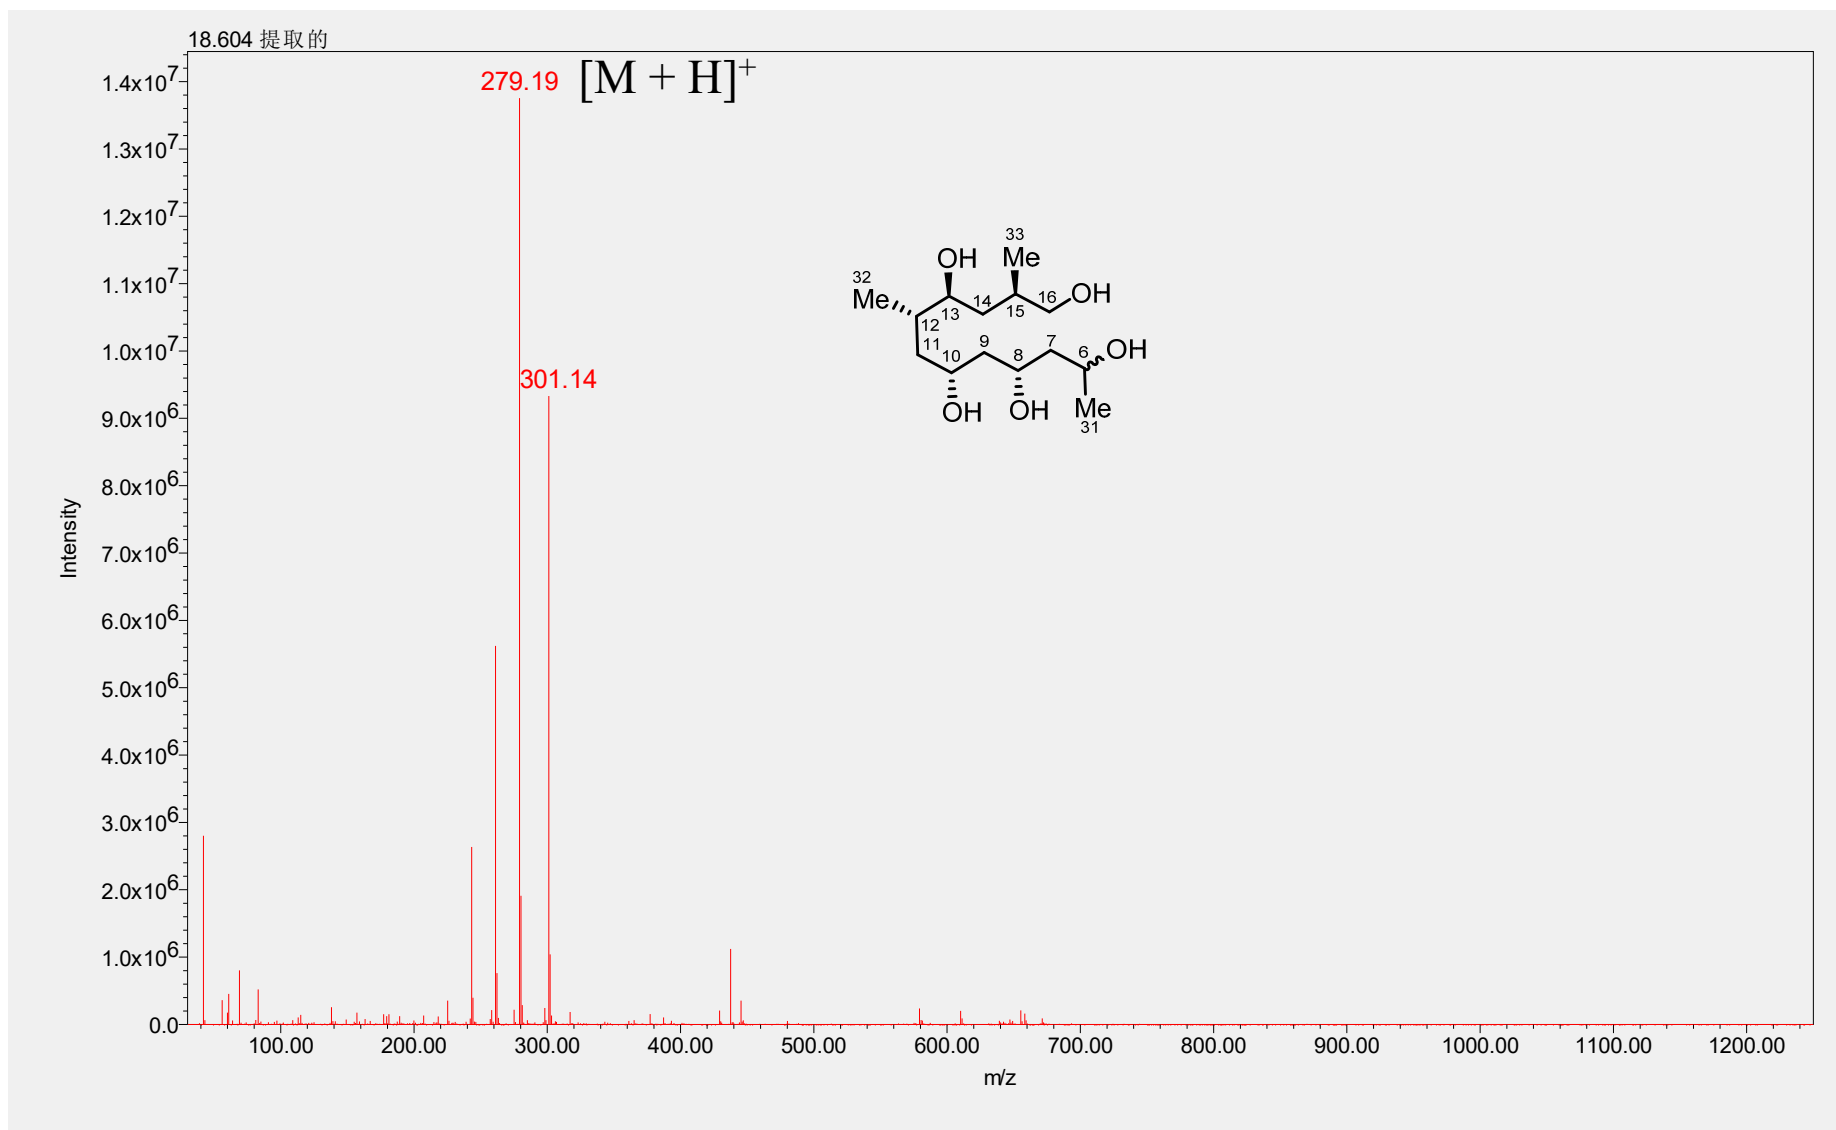

# LR-ESIMS for the fragment 1A

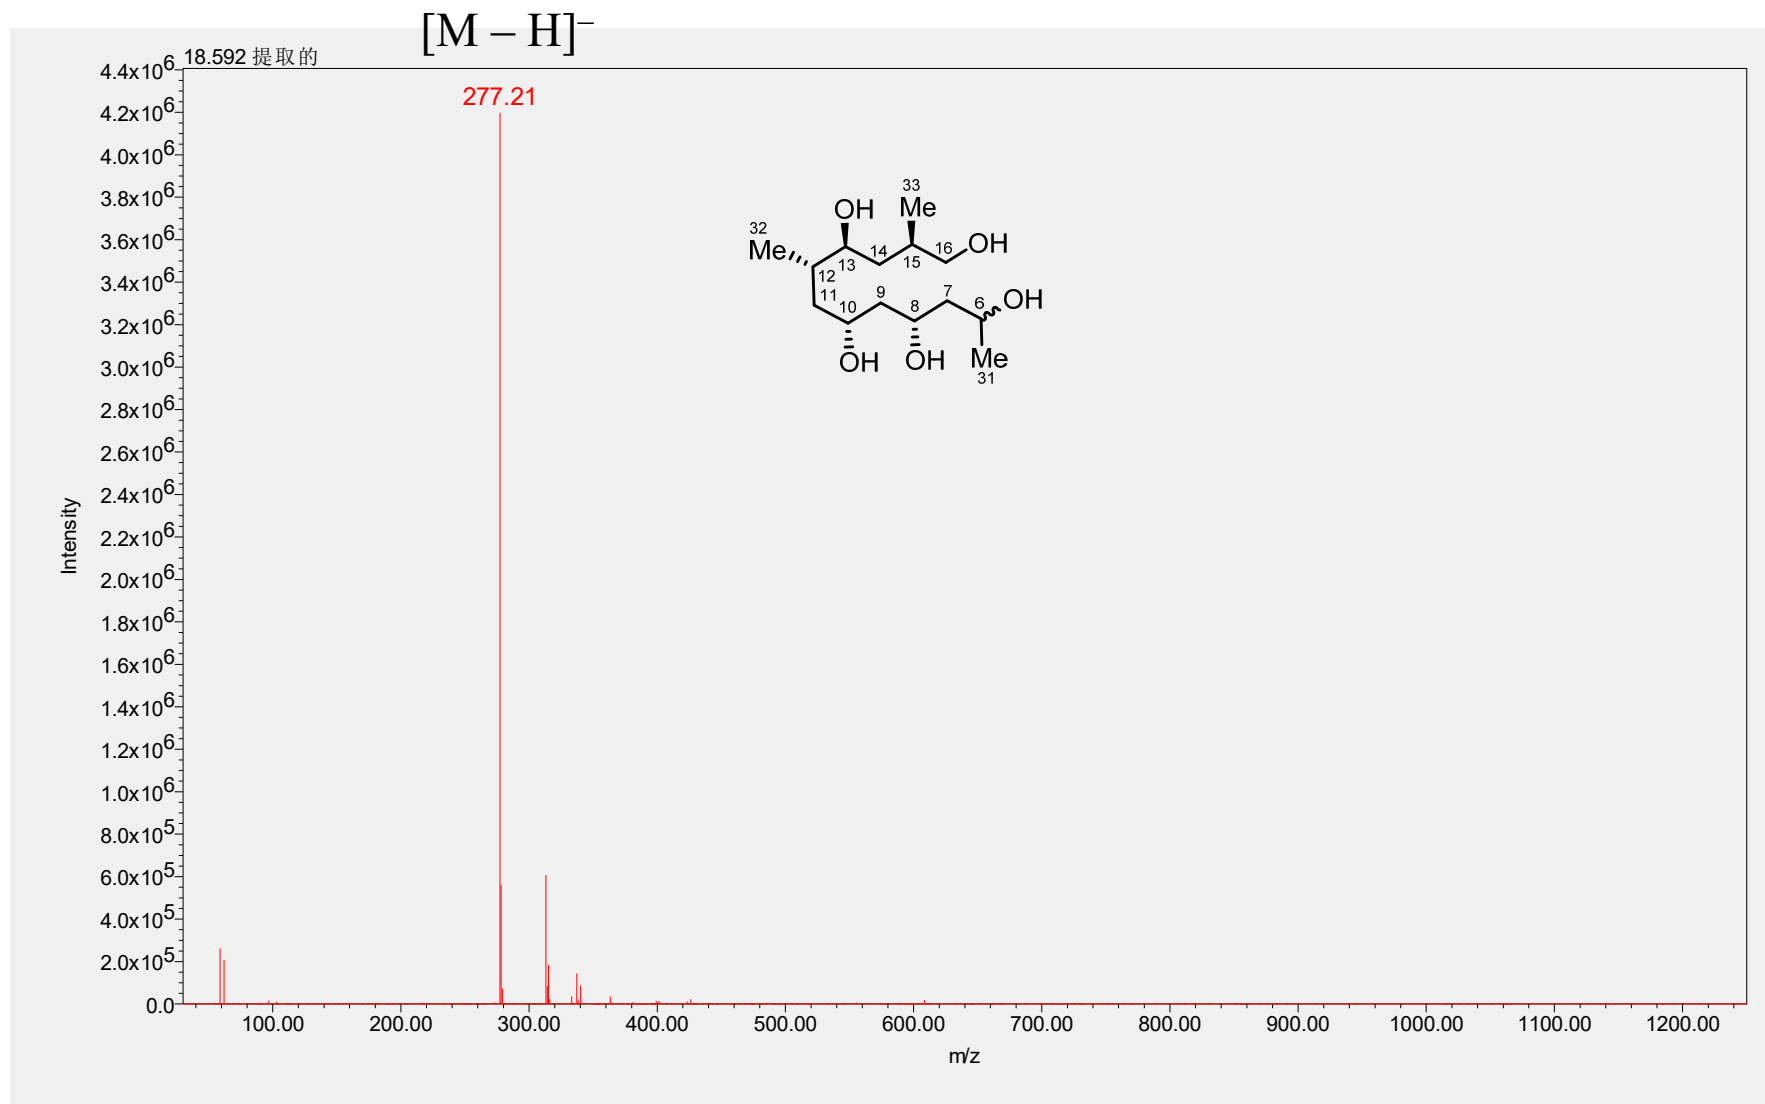

# $^1\text{H}$ (600 MHz) NMR spectrum of the fragment **1A** in $\text{CD}_3\text{OD}$

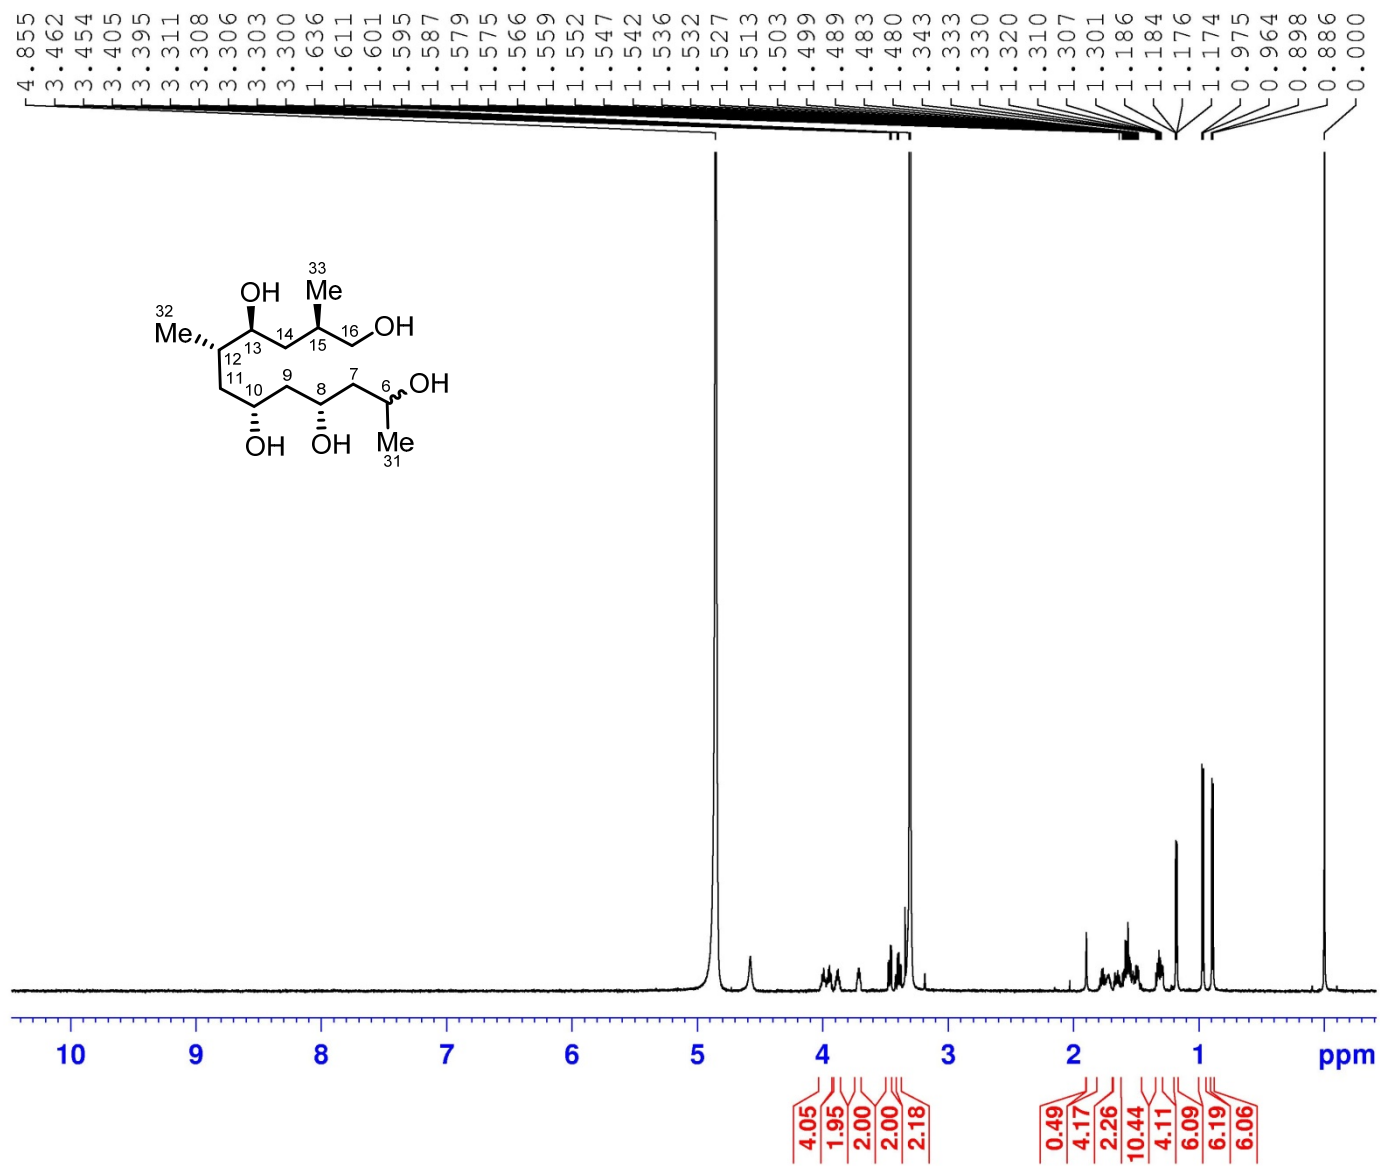

$^1\text{H}$  (600 MHz) NMR spectrum of the fragment **1A** in  $\text{CD}_3\text{OD}$

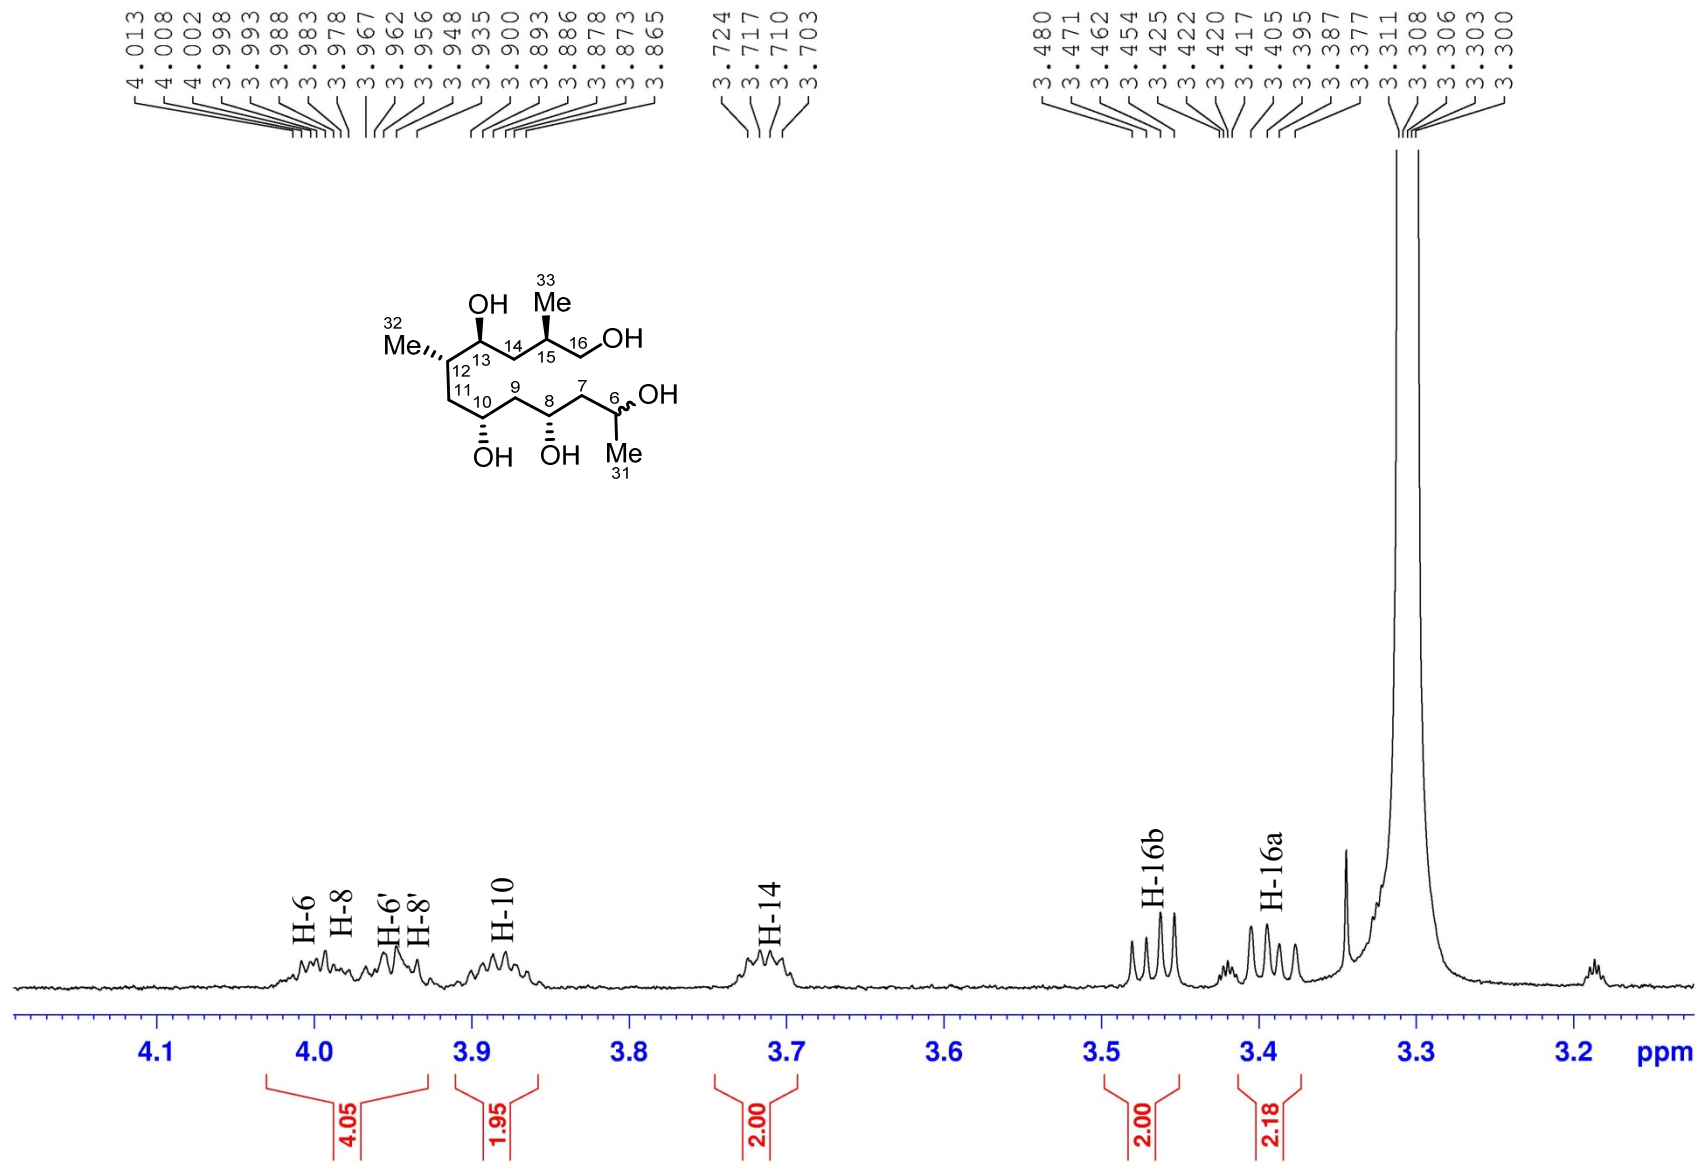

# $^1\text{H}$ (600 MHz) NMR spectrum of the fragment **1A** in $\text{CD}_3\text{OD}$

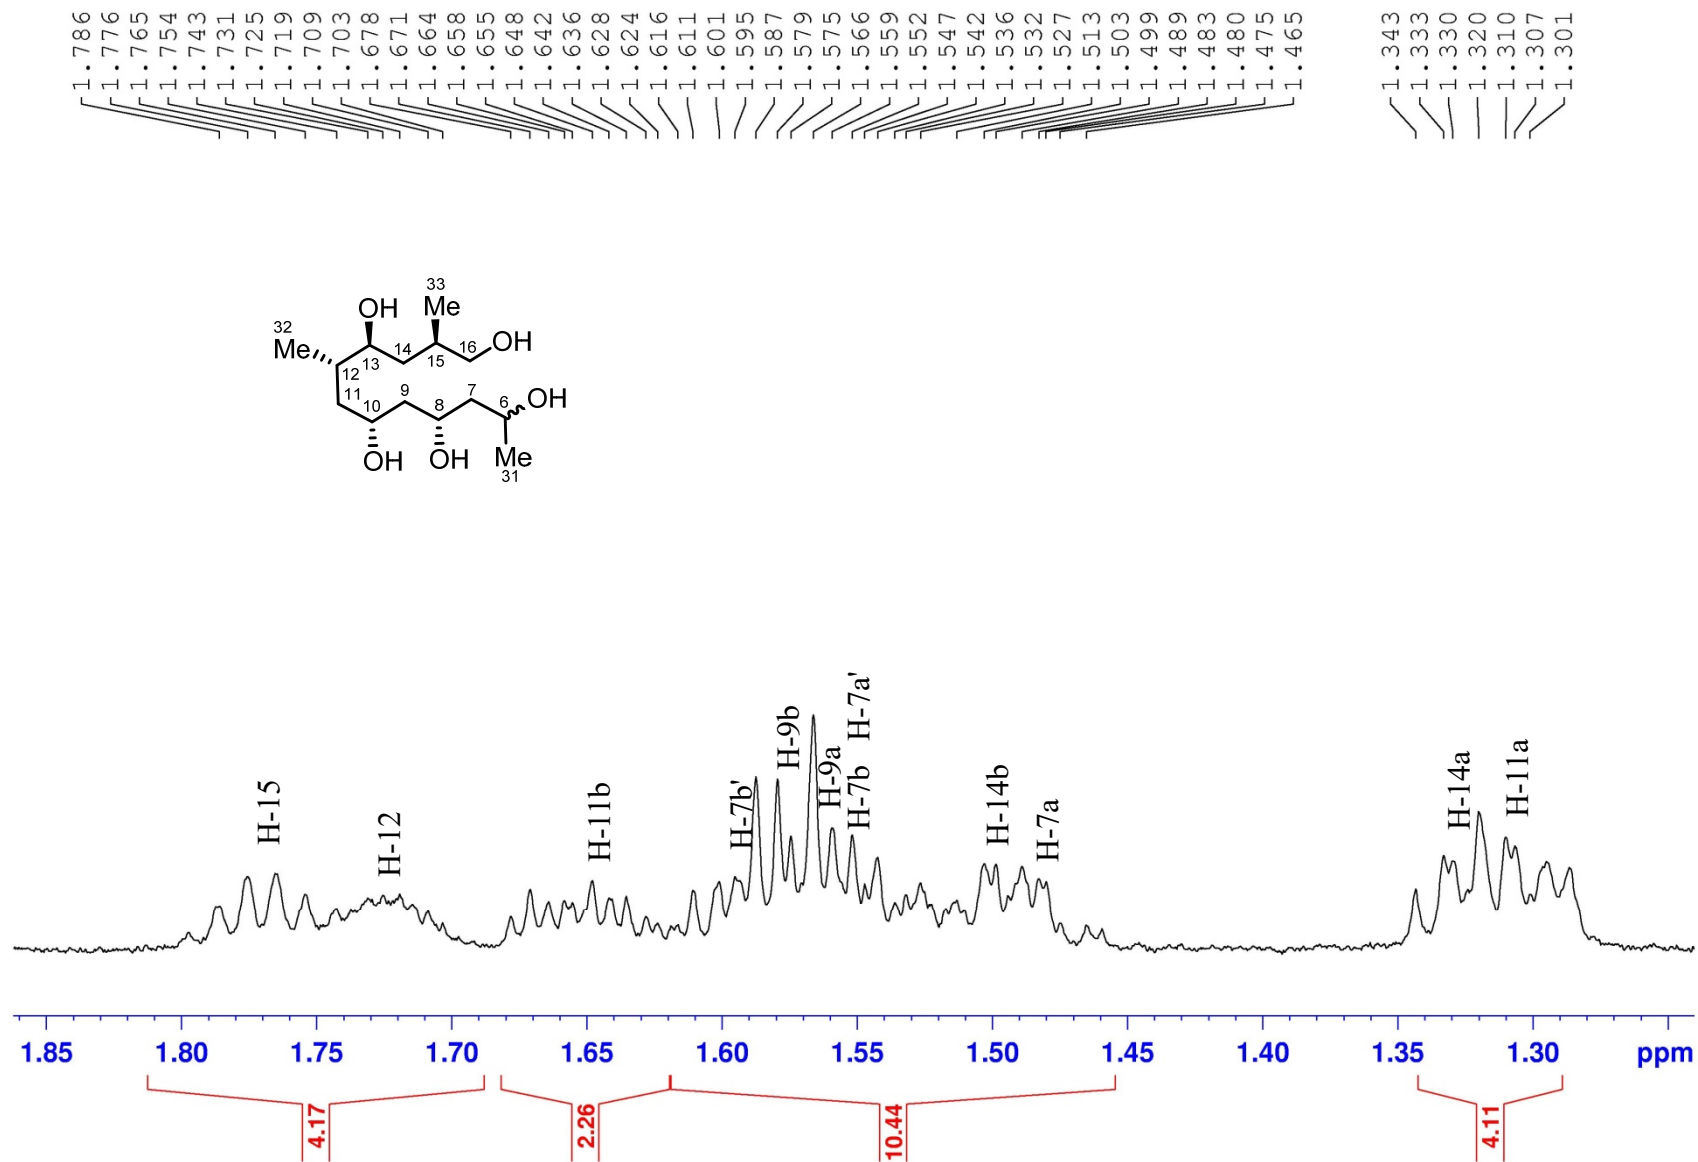

$^1\text{H}$  (600 MHz) NMR spectrum of the fragment **1A** in  $\text{CD}_3\text{OD}$

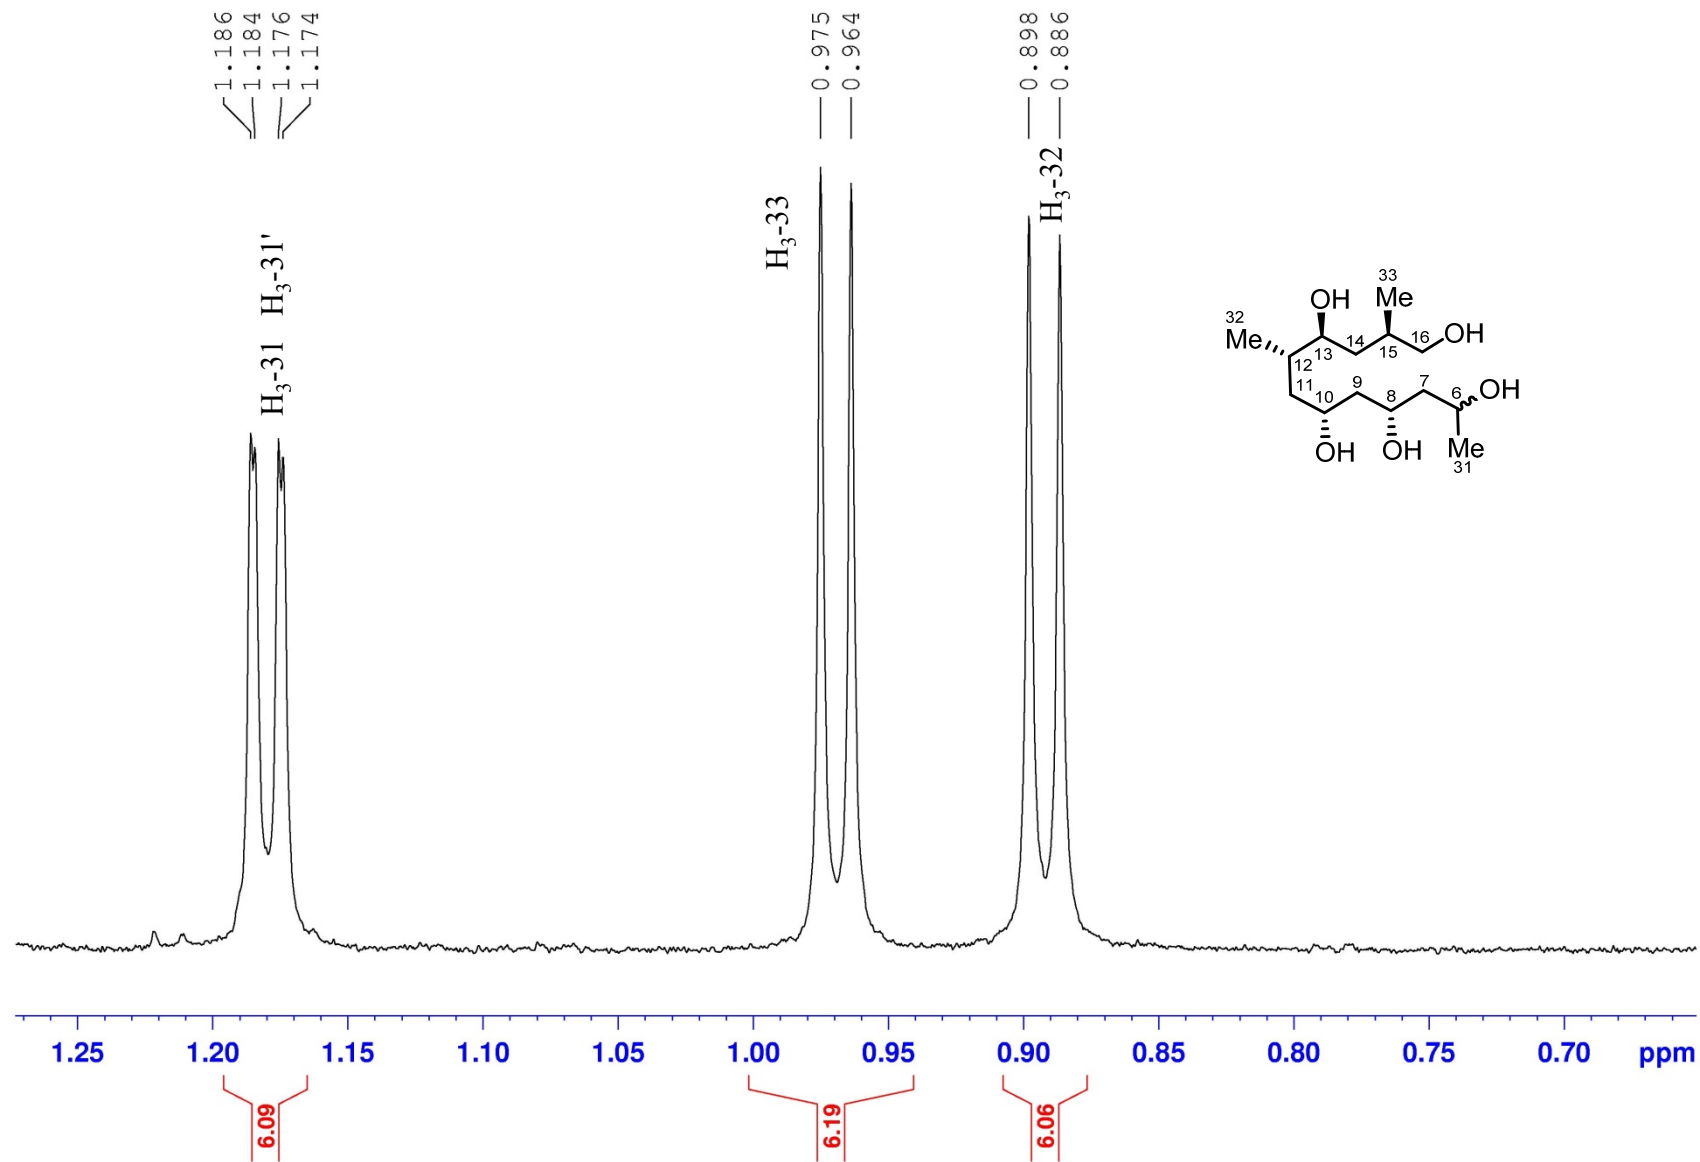

$^1\text{H}$ - $^1\text{H}$  COSY (600 MHz) spectrum of the fragment **1A** in  $\text{CD}_3\text{OD}$

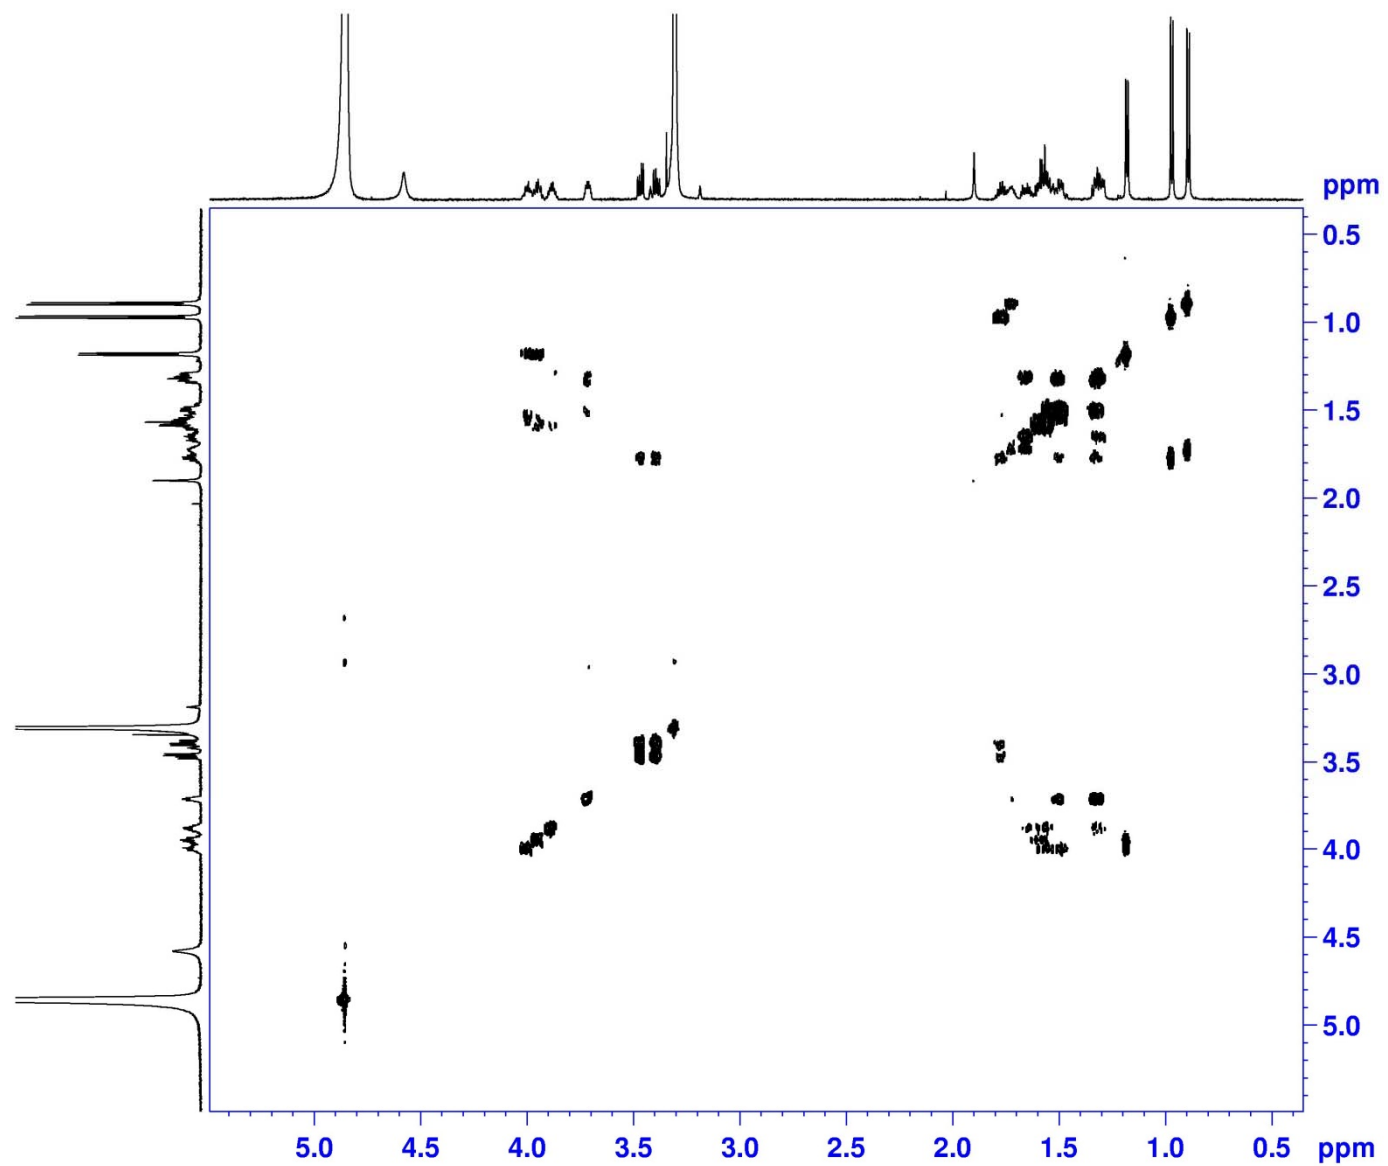



$^1\text{H}$ - $^1\text{H}$  COSY (600 MHz) spectrum of the fragment **1A** in  $\text{CD}_3\text{OD}$

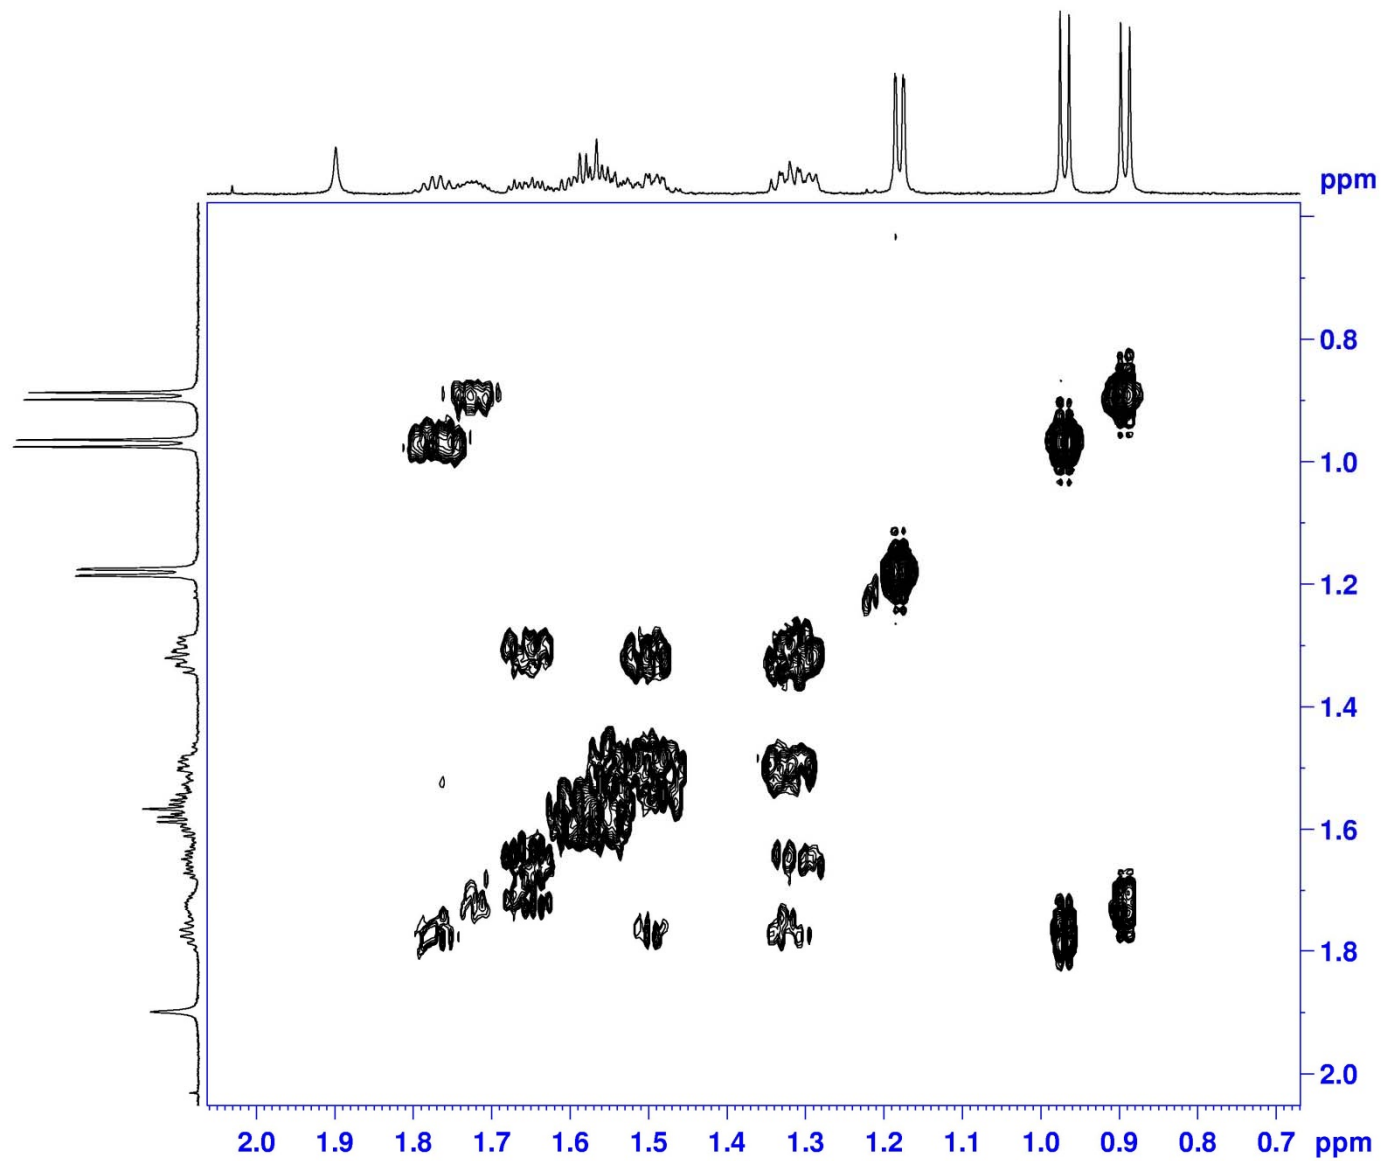

$^1\text{H}$ - $^1\text{H}$  COSY (600 MHz) spectrum of the fragment **1A** in  $\text{CD}_3\text{OD}$

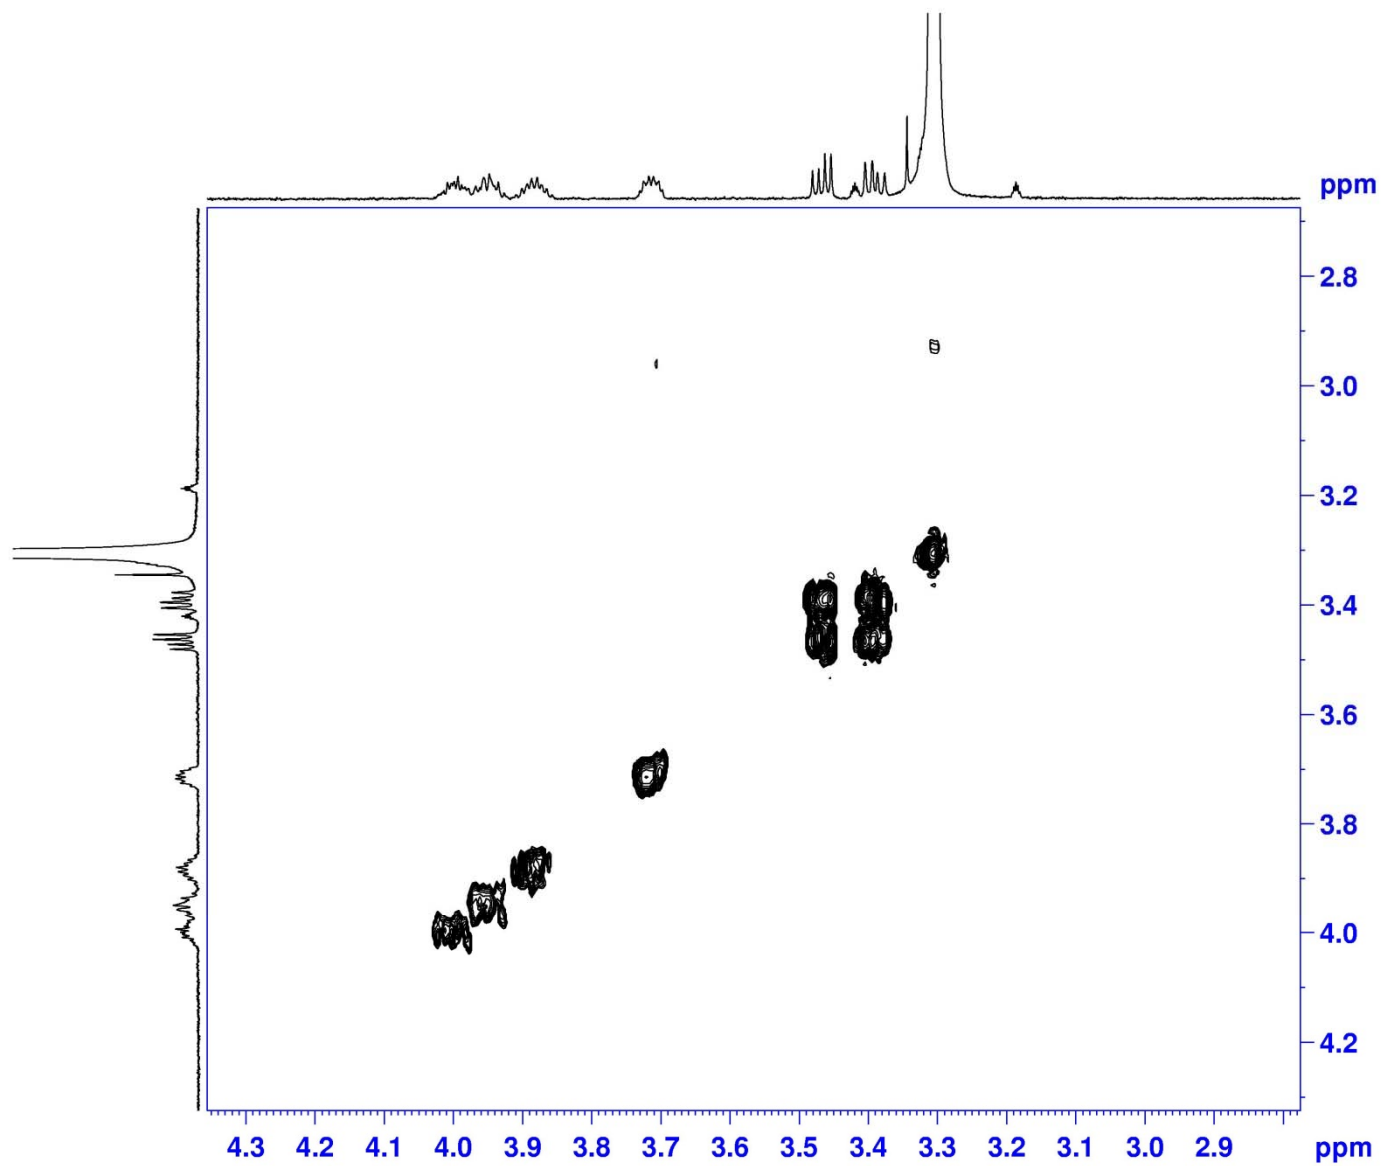

$^1\text{H}$ - $^1\text{H}$  COSY (600 MHz) spectrum of the fragment **1A** in  $\text{CD}_3\text{OD}$

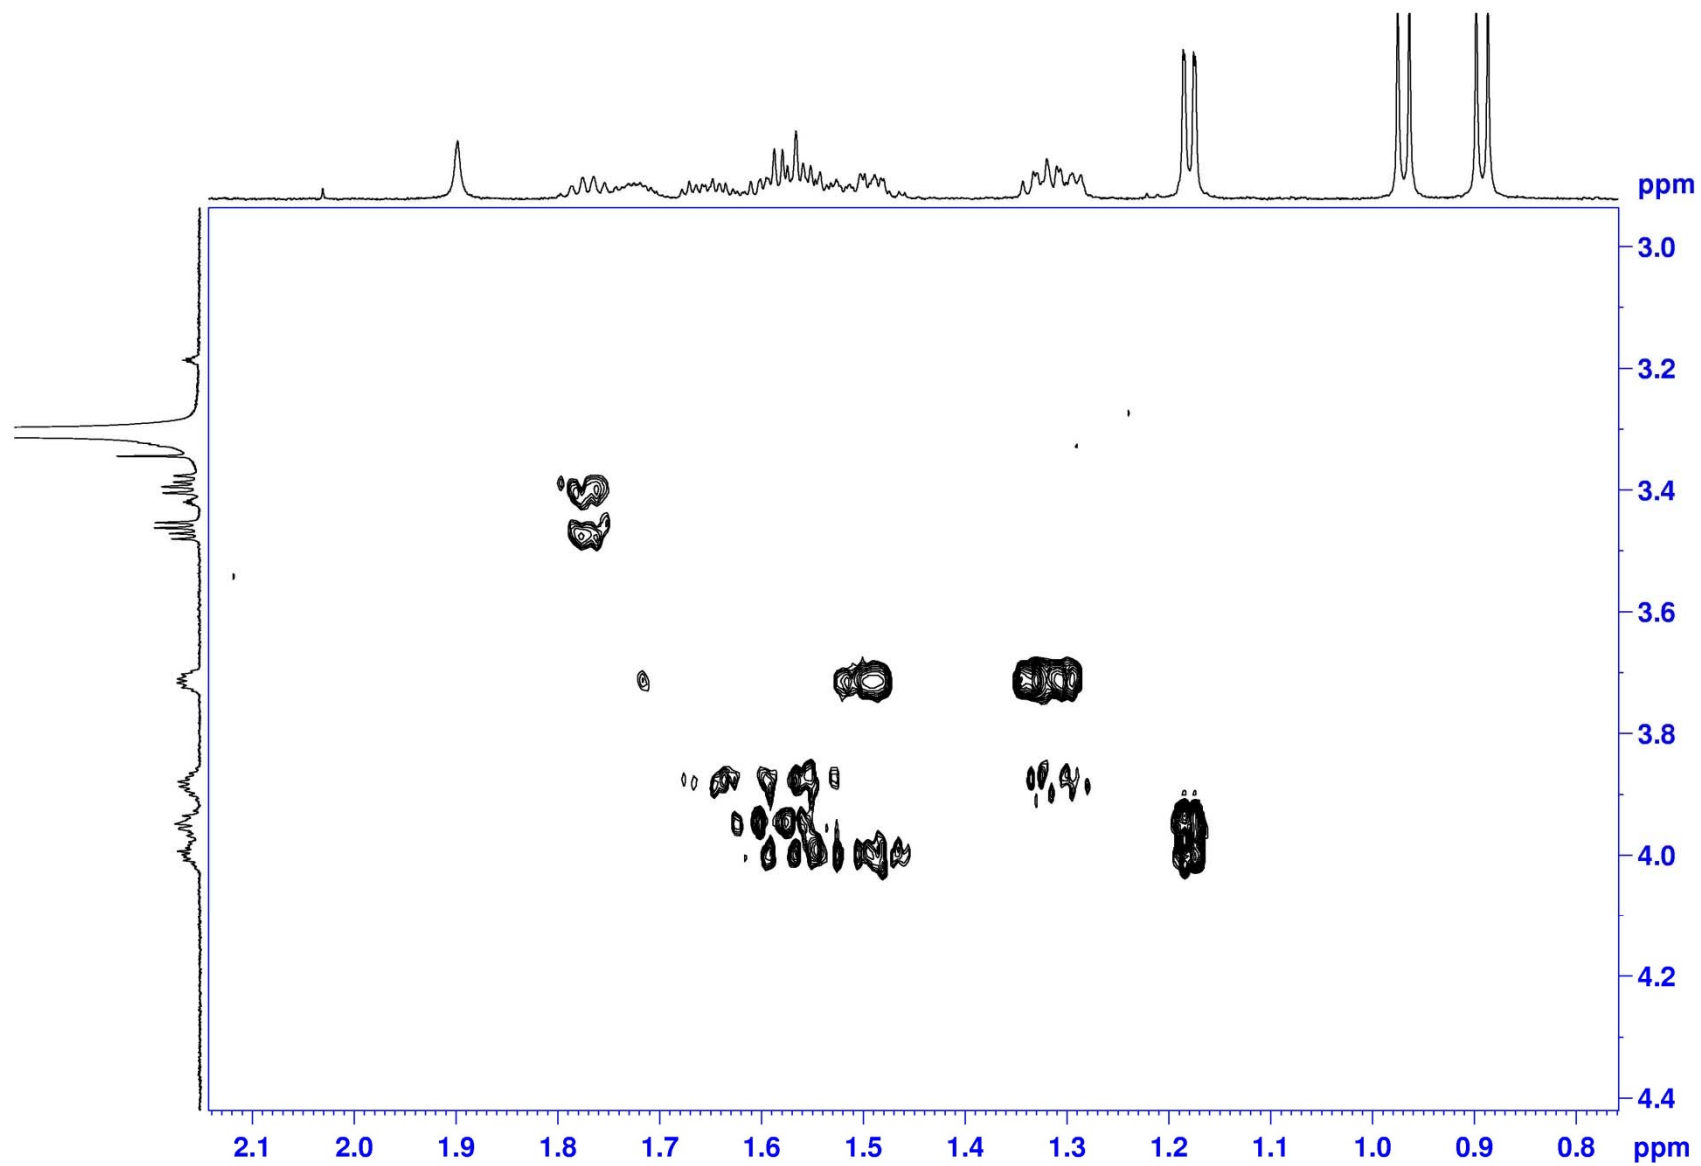

# LR-ESIMS for the fragment 1B

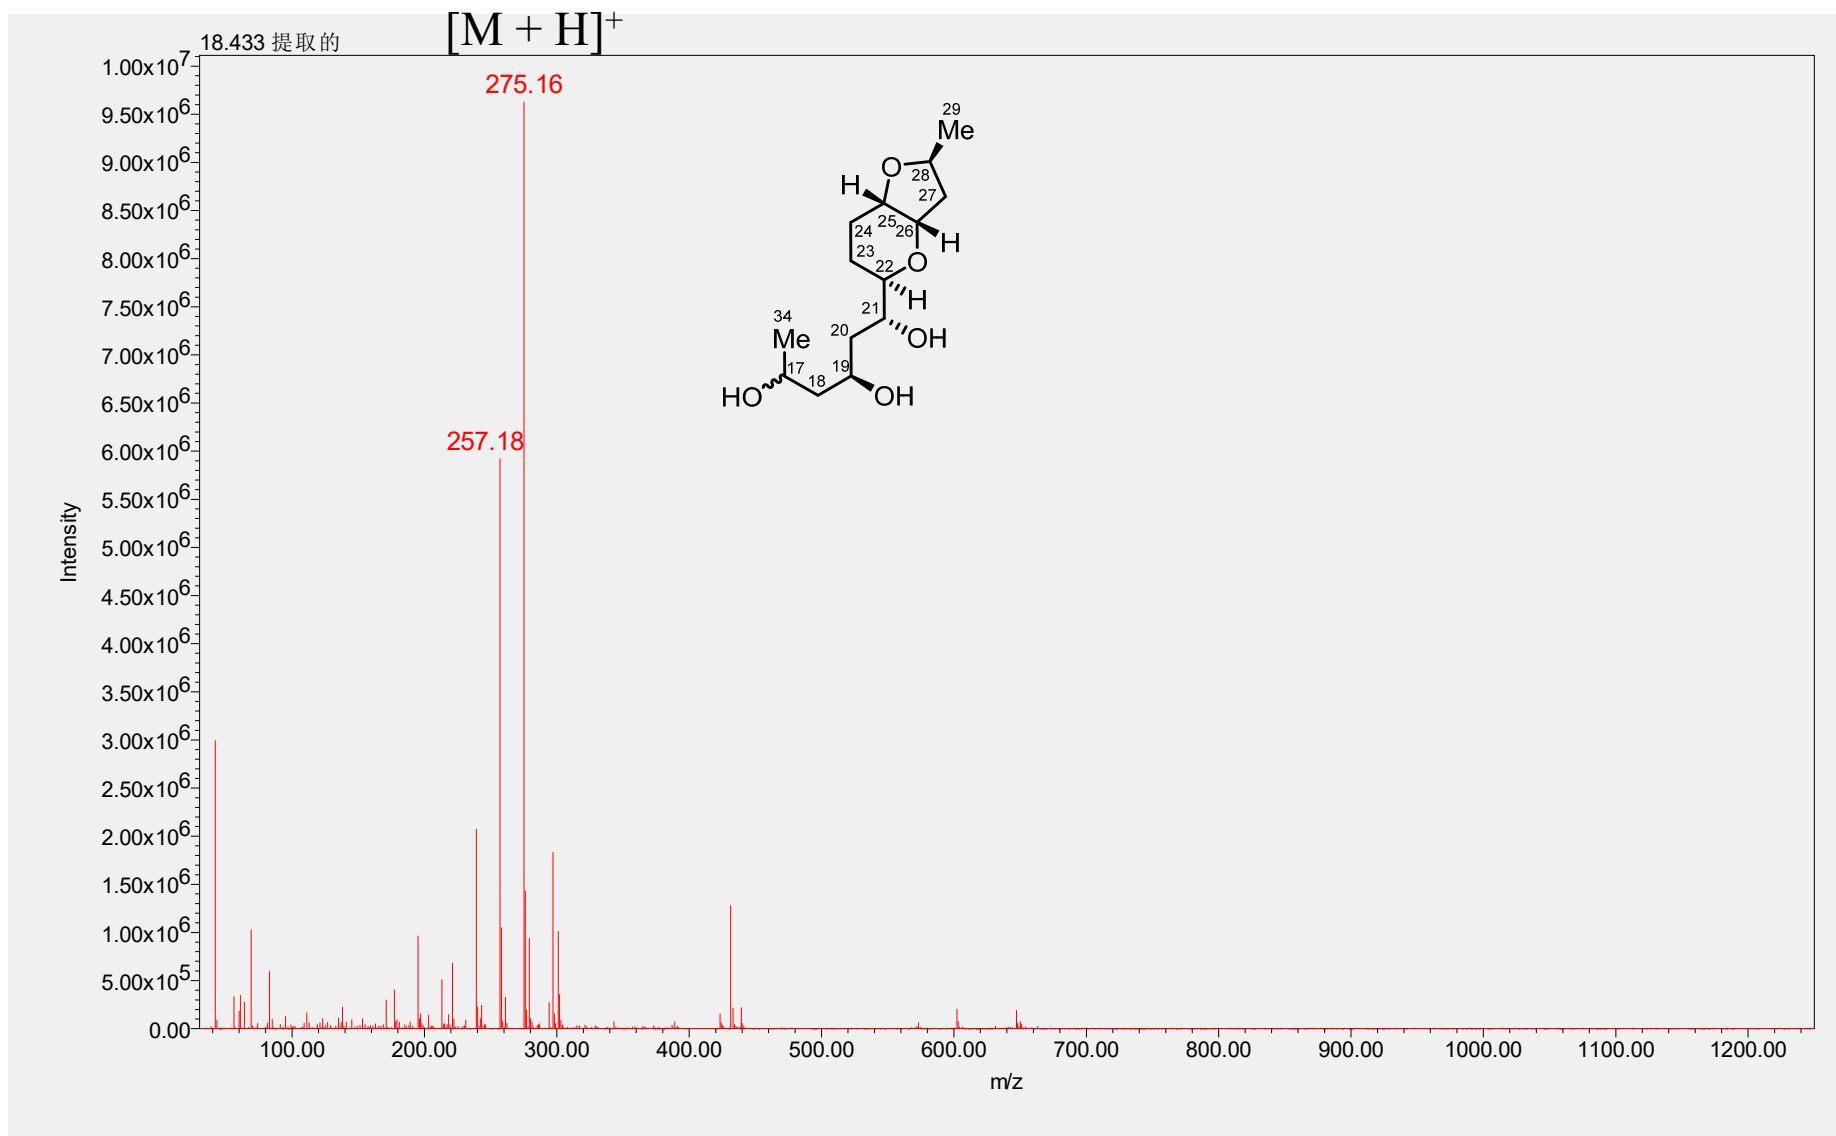

# LR-ESIMS for the fragment **1B**

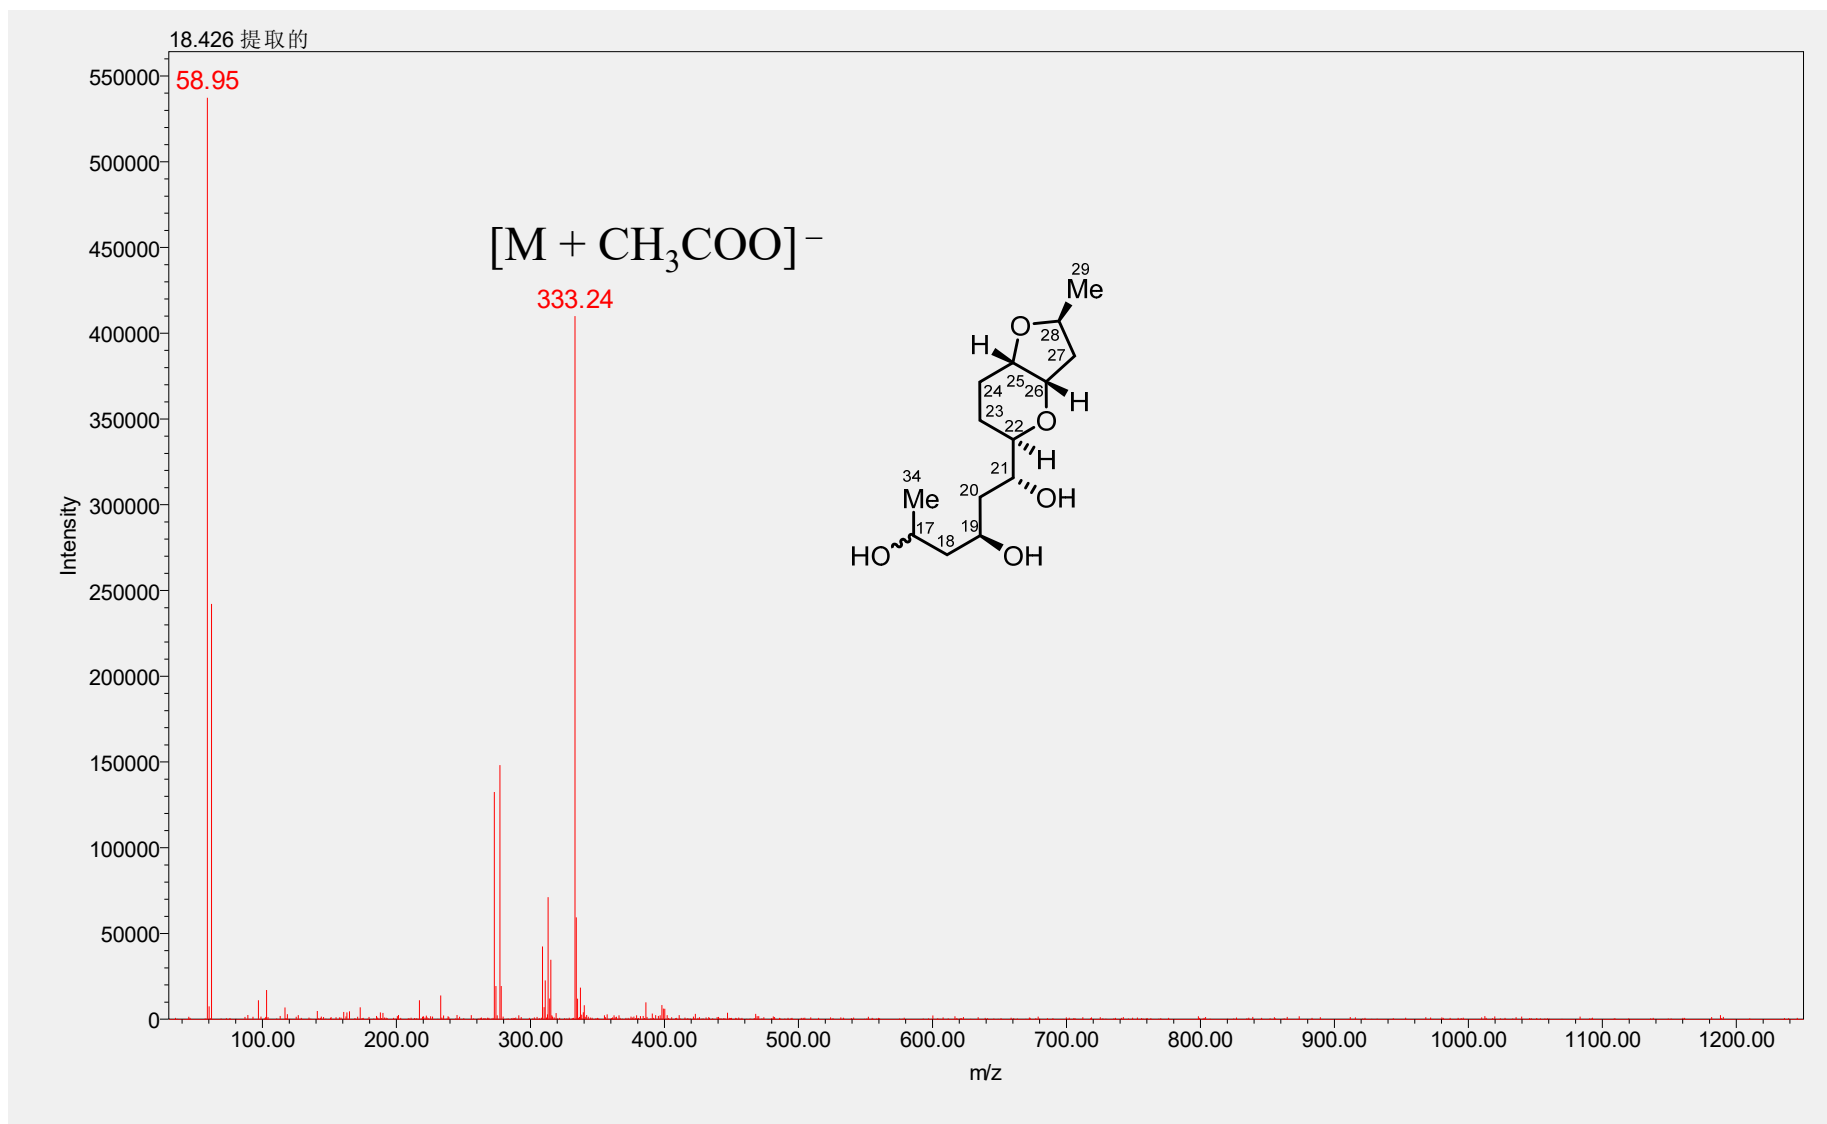

$^1\text{H}$  (600 MHz) NMR spectrum of the fragment **1B** in  $\text{CD}_3\text{OD}$

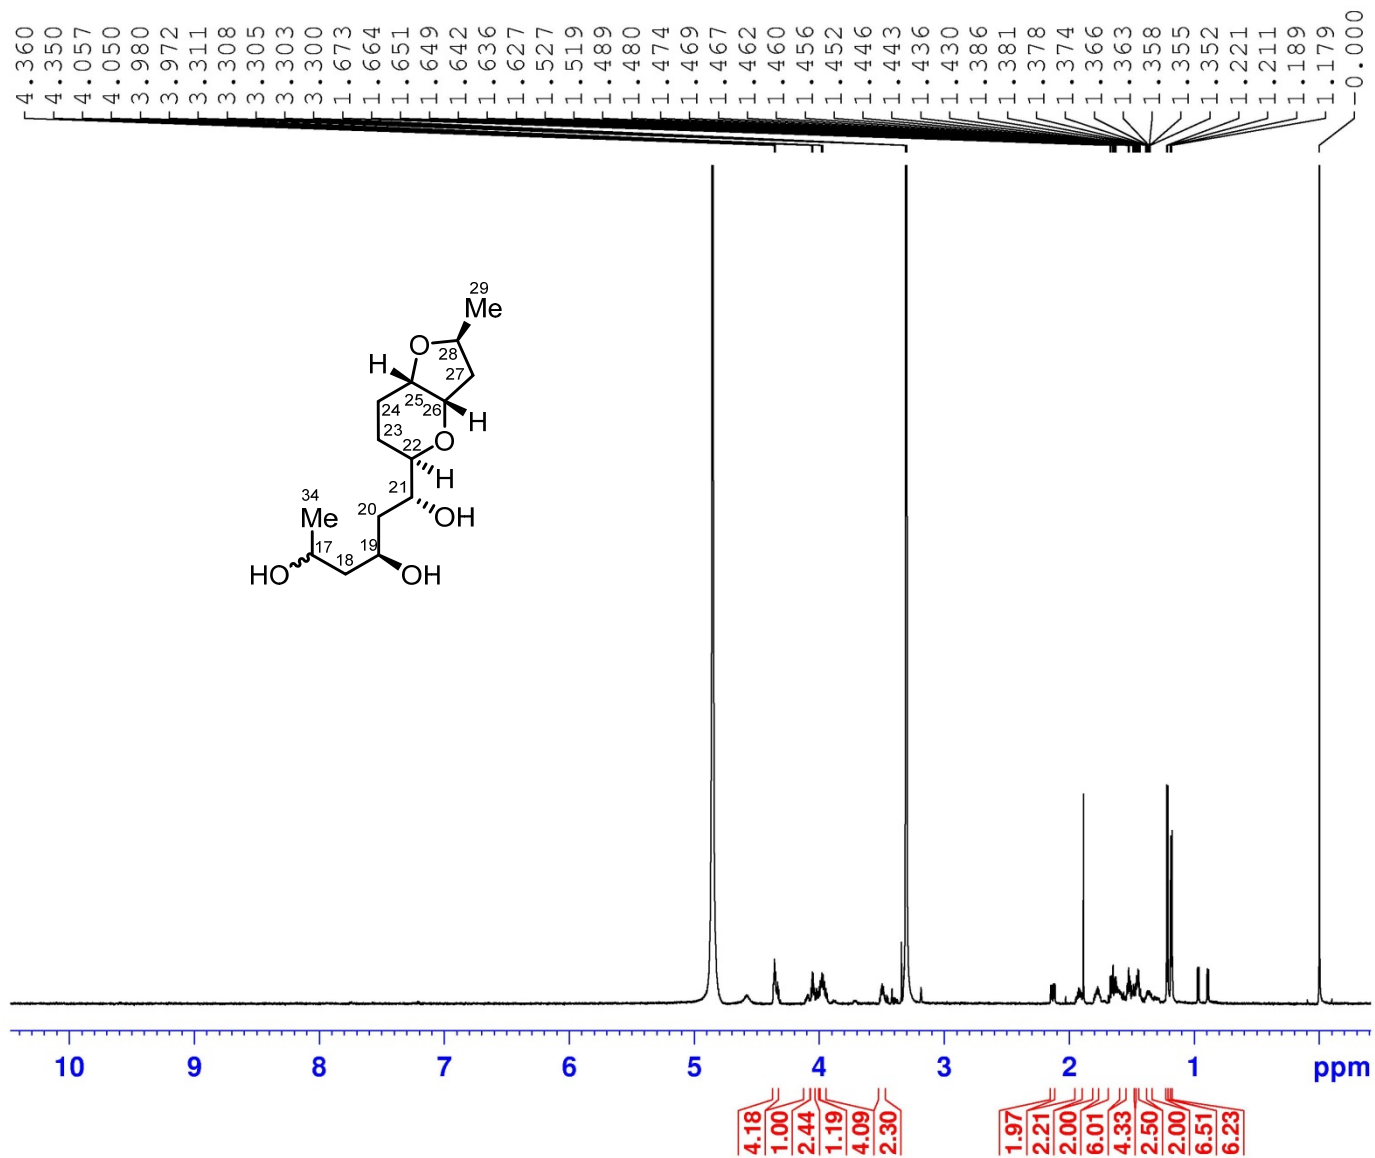

$^1\text{H}$  (600 MHz) NMR spectrum of the fragment **1B** in  $\text{CD}_3\text{OD}$

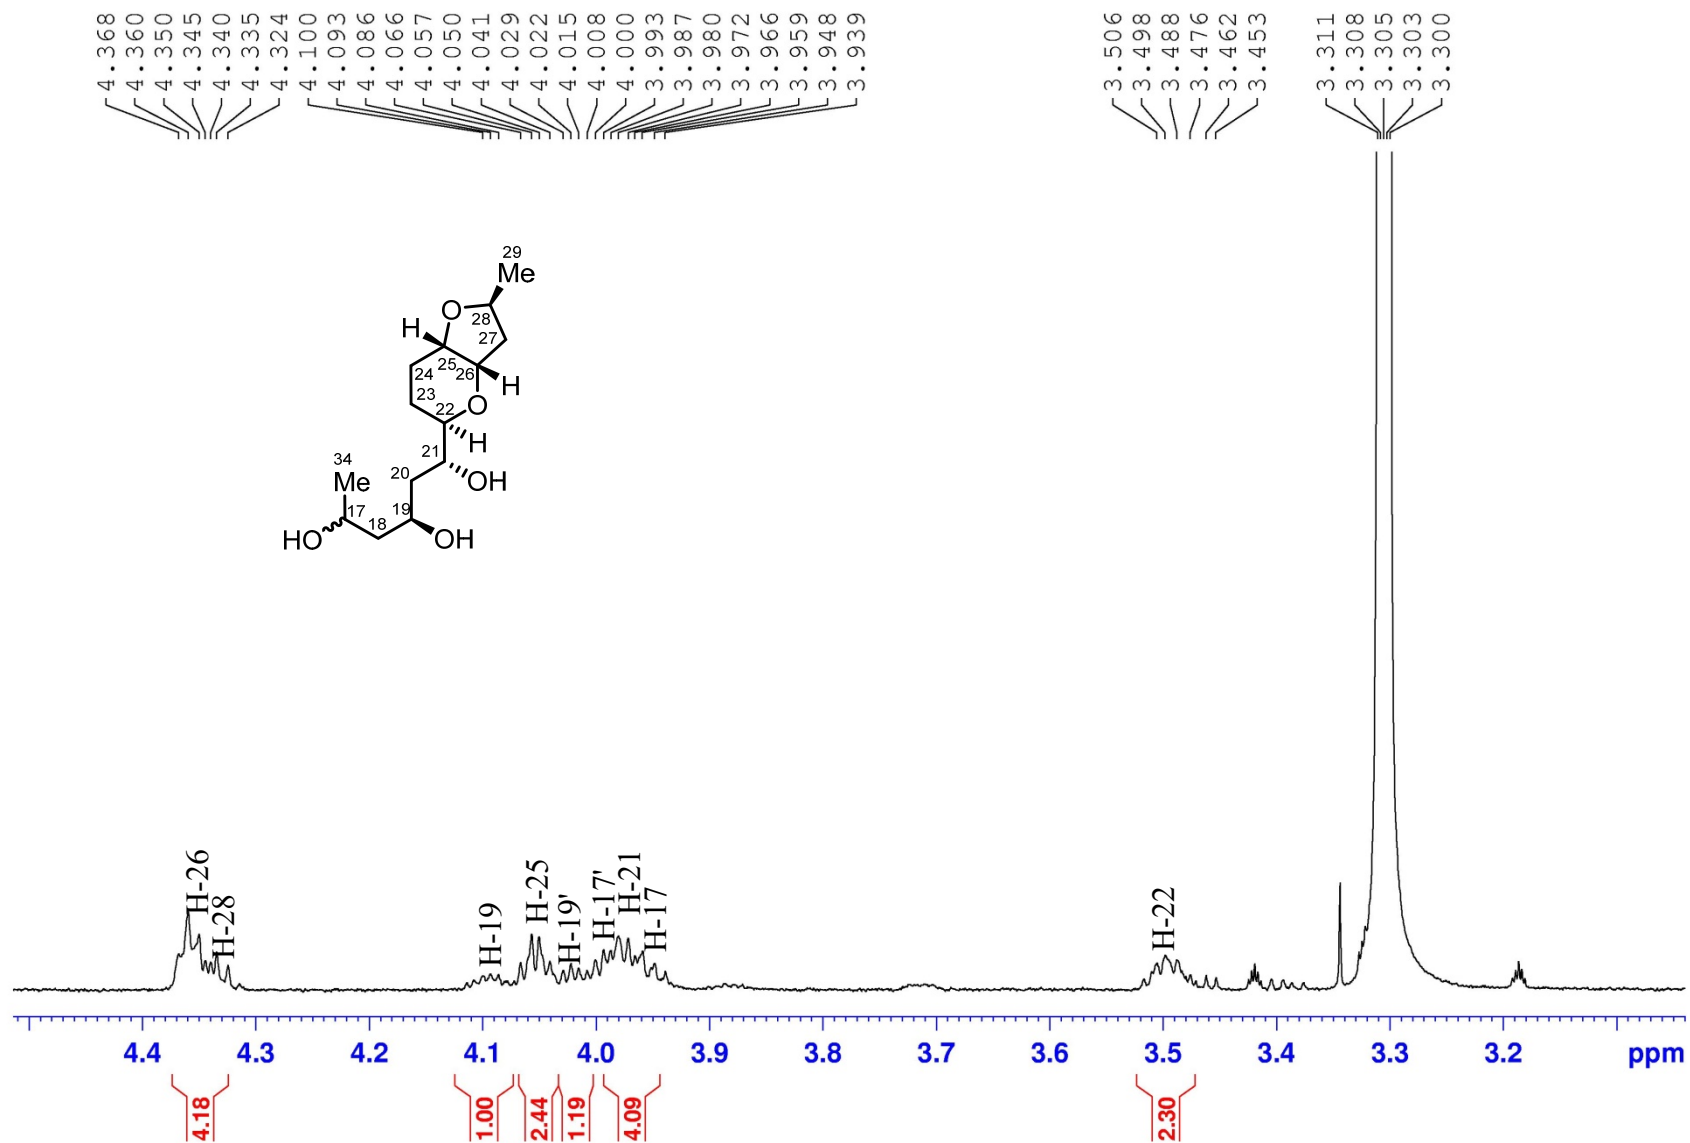

$^1\text{H}$  (600 MHz) NMR spectrum of the fragment **1B** in  $\text{CD}_3\text{OD}$

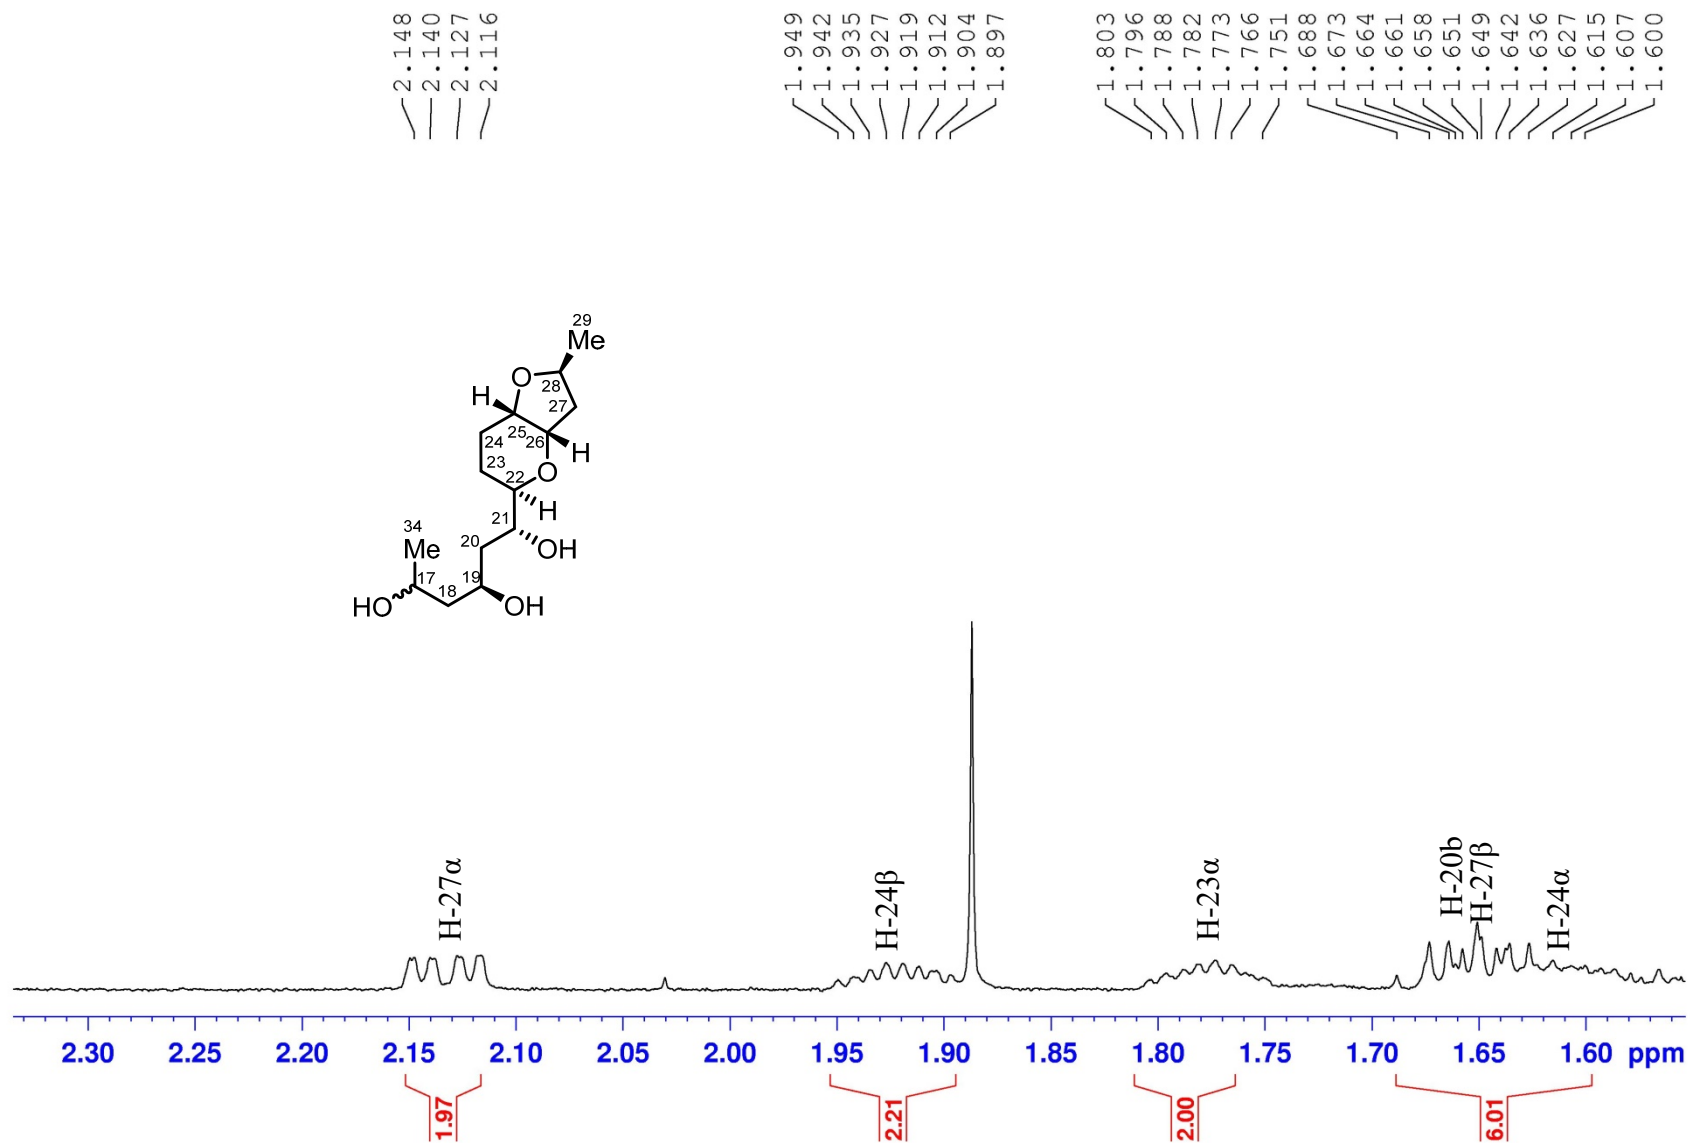



$^1\text{H}$  (600 MHz) NMR spectrum of the fragment **1B** in  $\text{CD}_3\text{OD}$

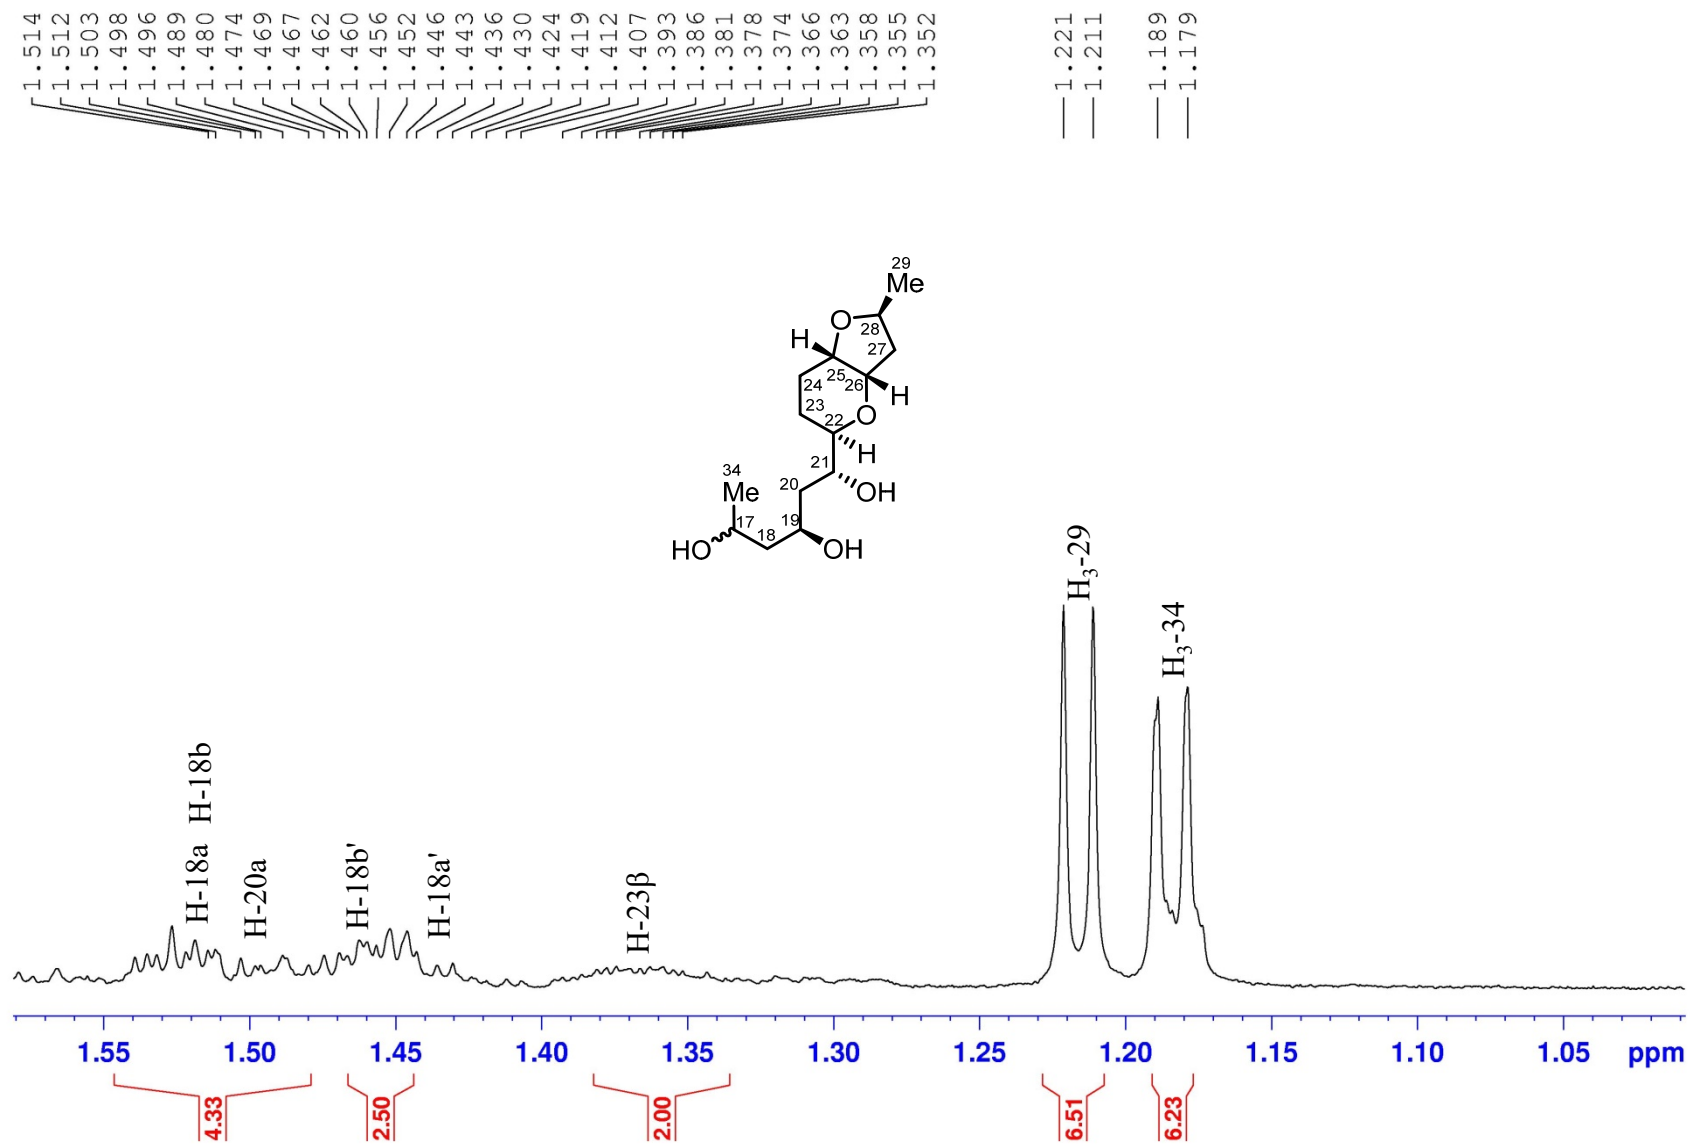

$^1\text{H}$ - $^1\text{H}$  COSY (600 MHz) spectrum of the fragment **1B** in  $\text{CD}_3\text{OD}$

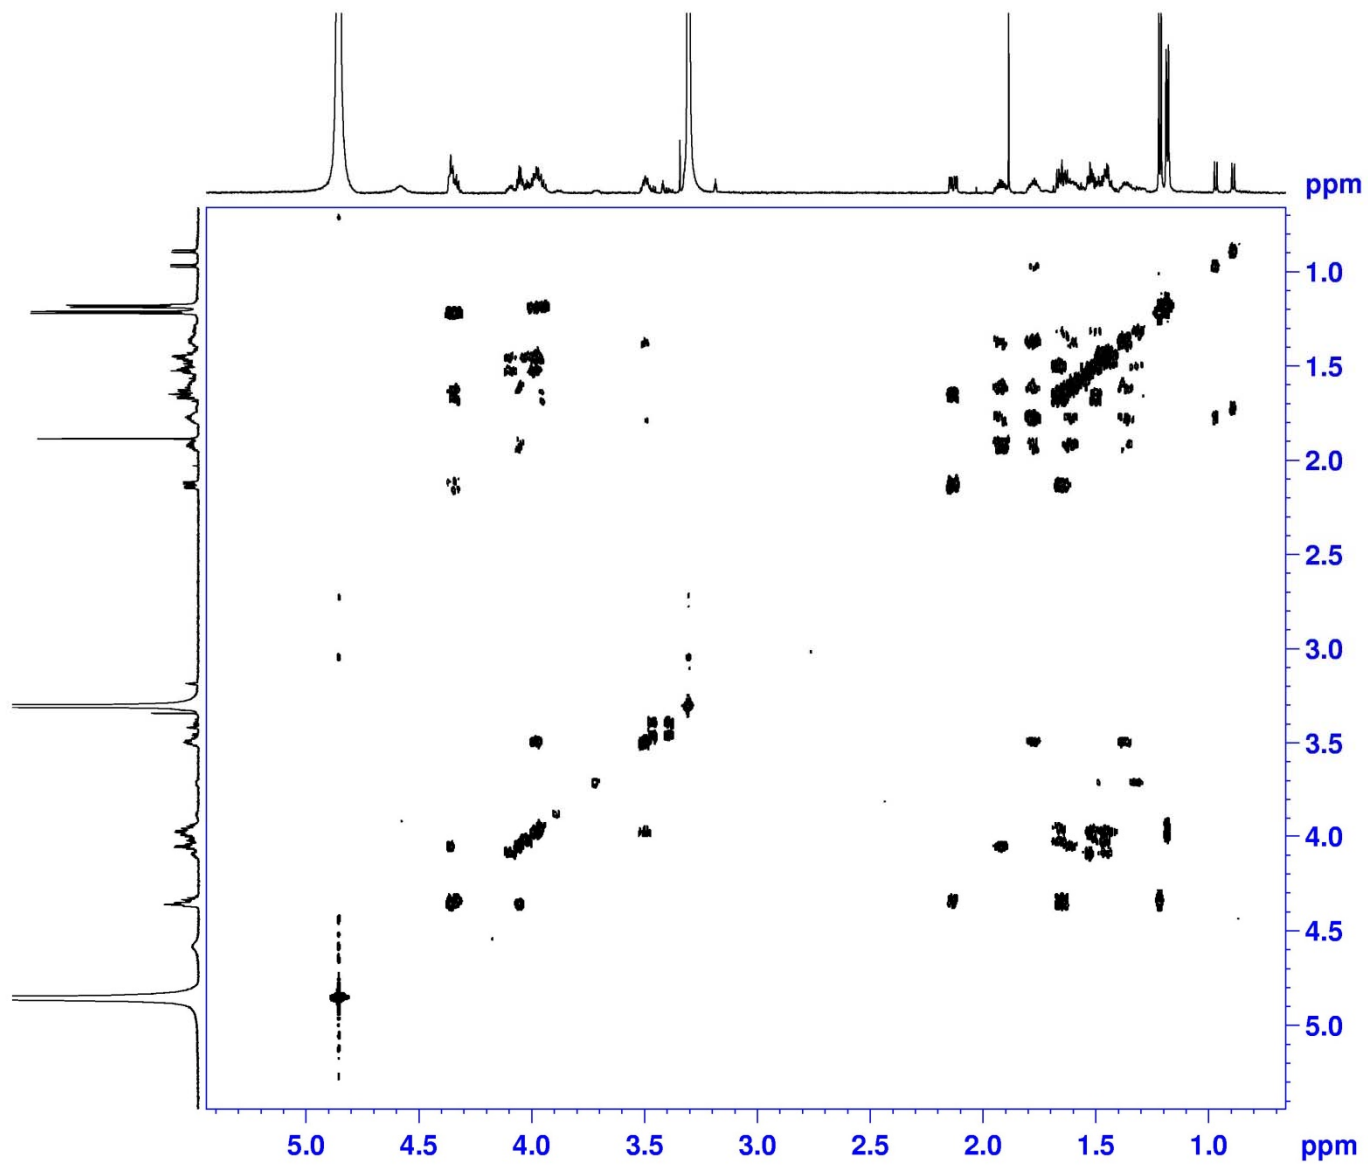

$^1\text{H}$ - $^1\text{H}$  COSY (600 MHz) spectrum of the fragment **1B** in  $\text{CD}_3\text{OD}$

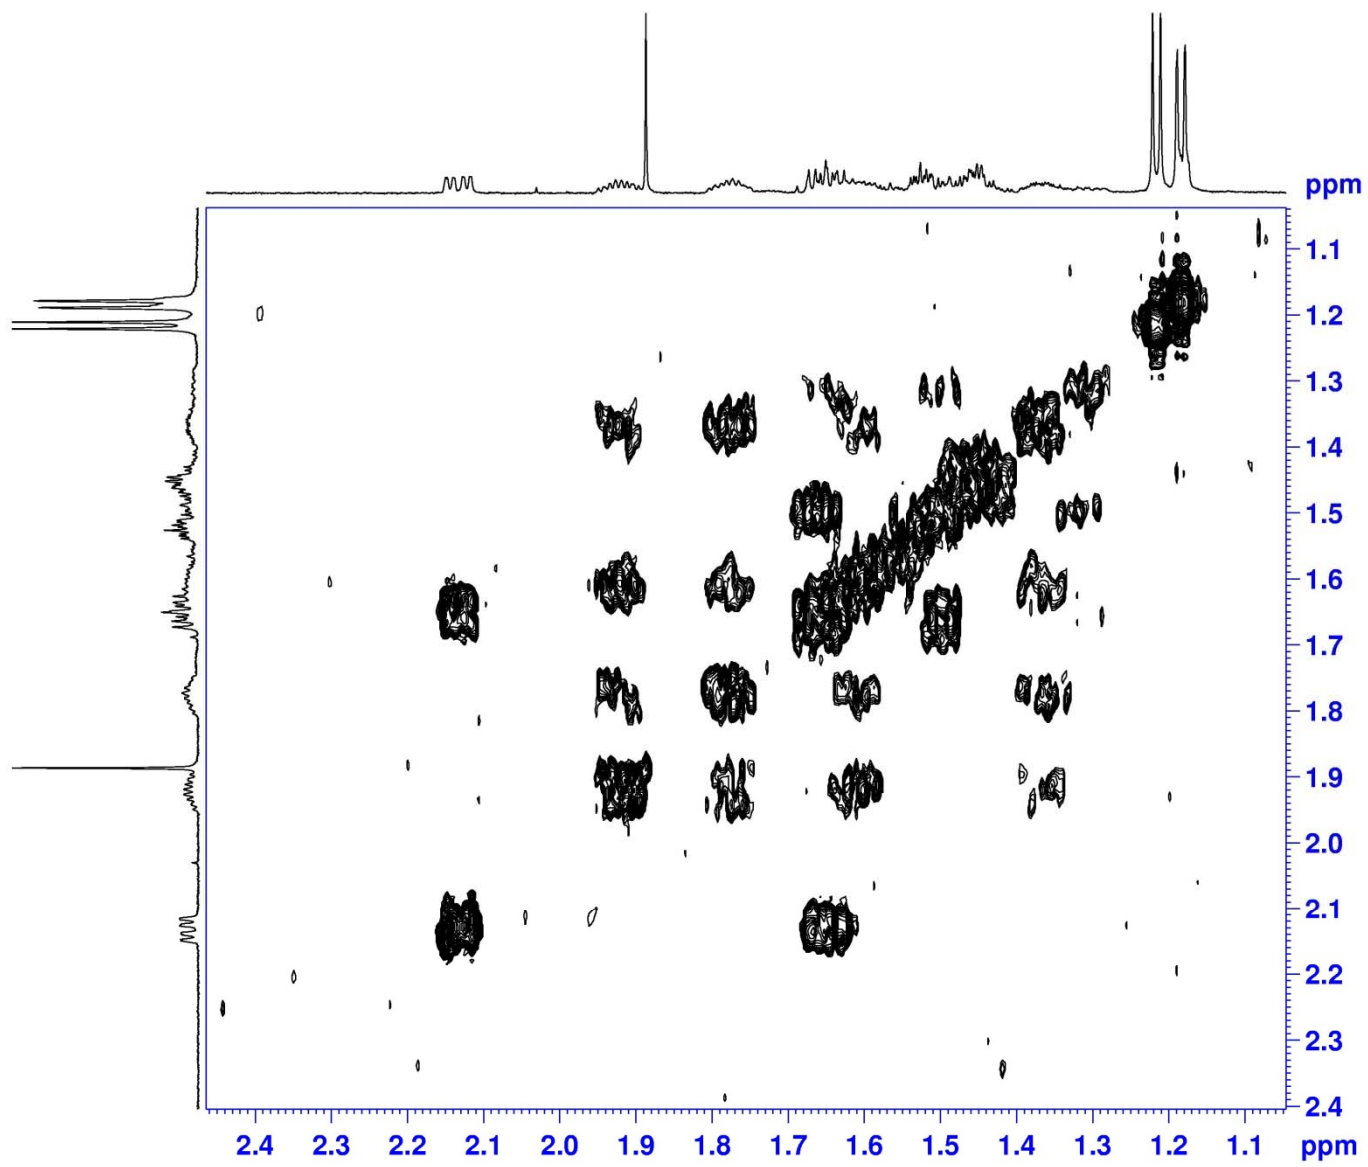

$^1\text{H}$ - $^1\text{H}$  COSY (600 MHz) spectrum of the fragment **1B** in  $\text{CD}_3\text{OD}$

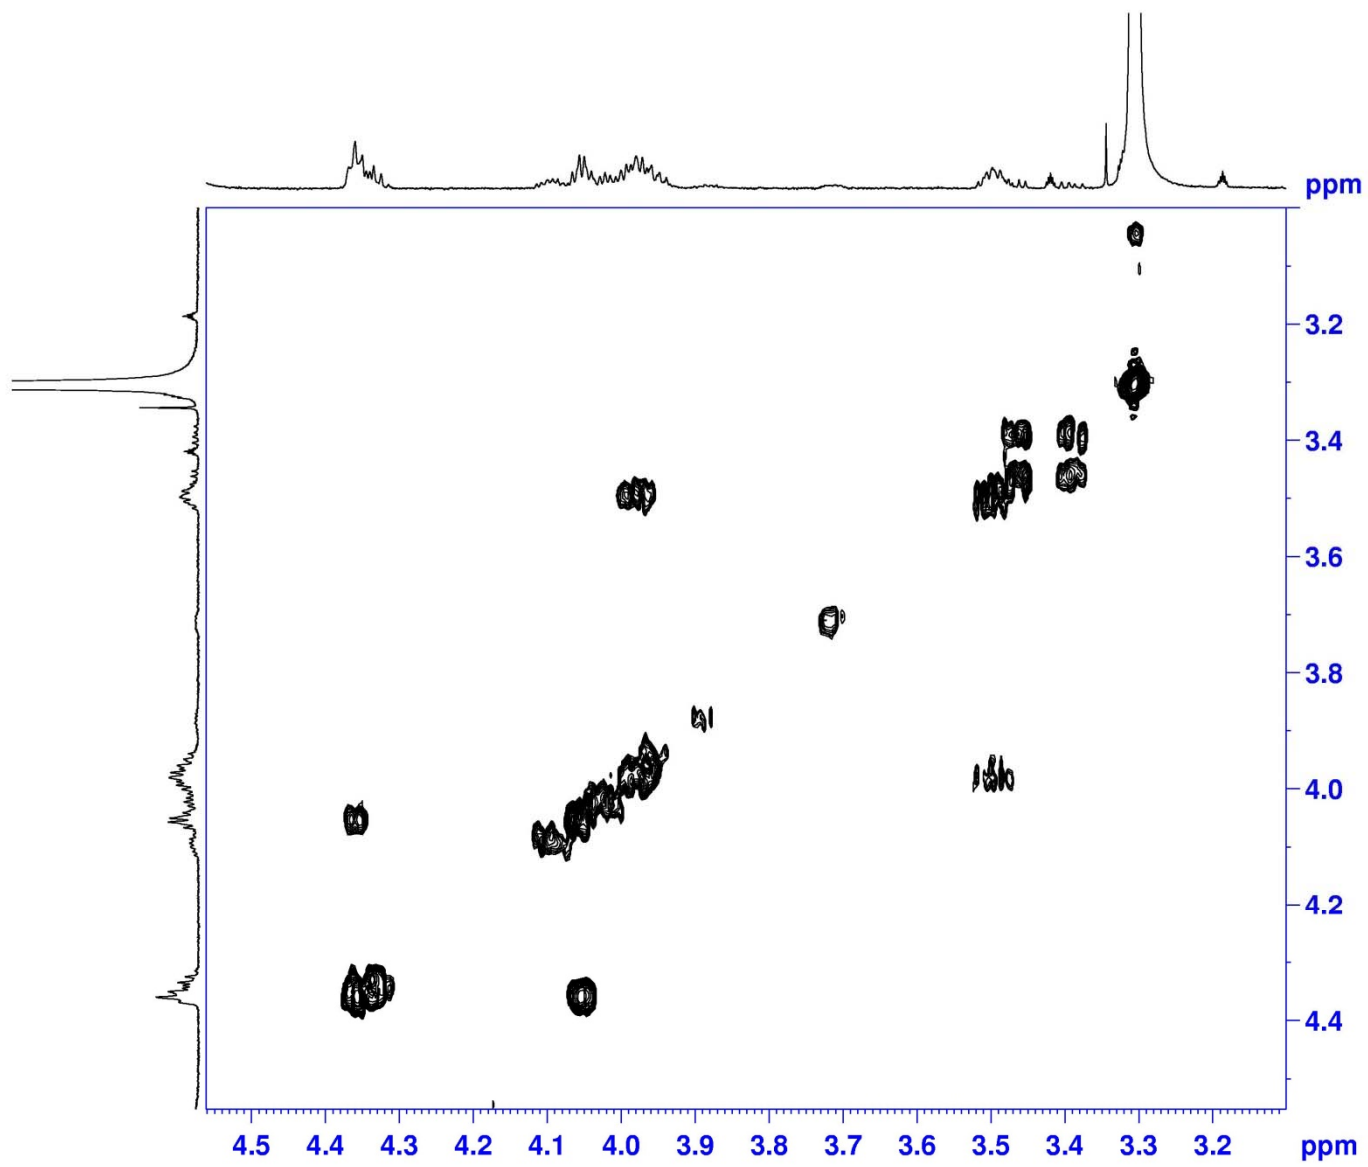

$^1\text{H}$ - $^1\text{H}$  COSY (600 MHz) spectrum of the fragment **1B** in  $\text{CD}_3\text{OD}$

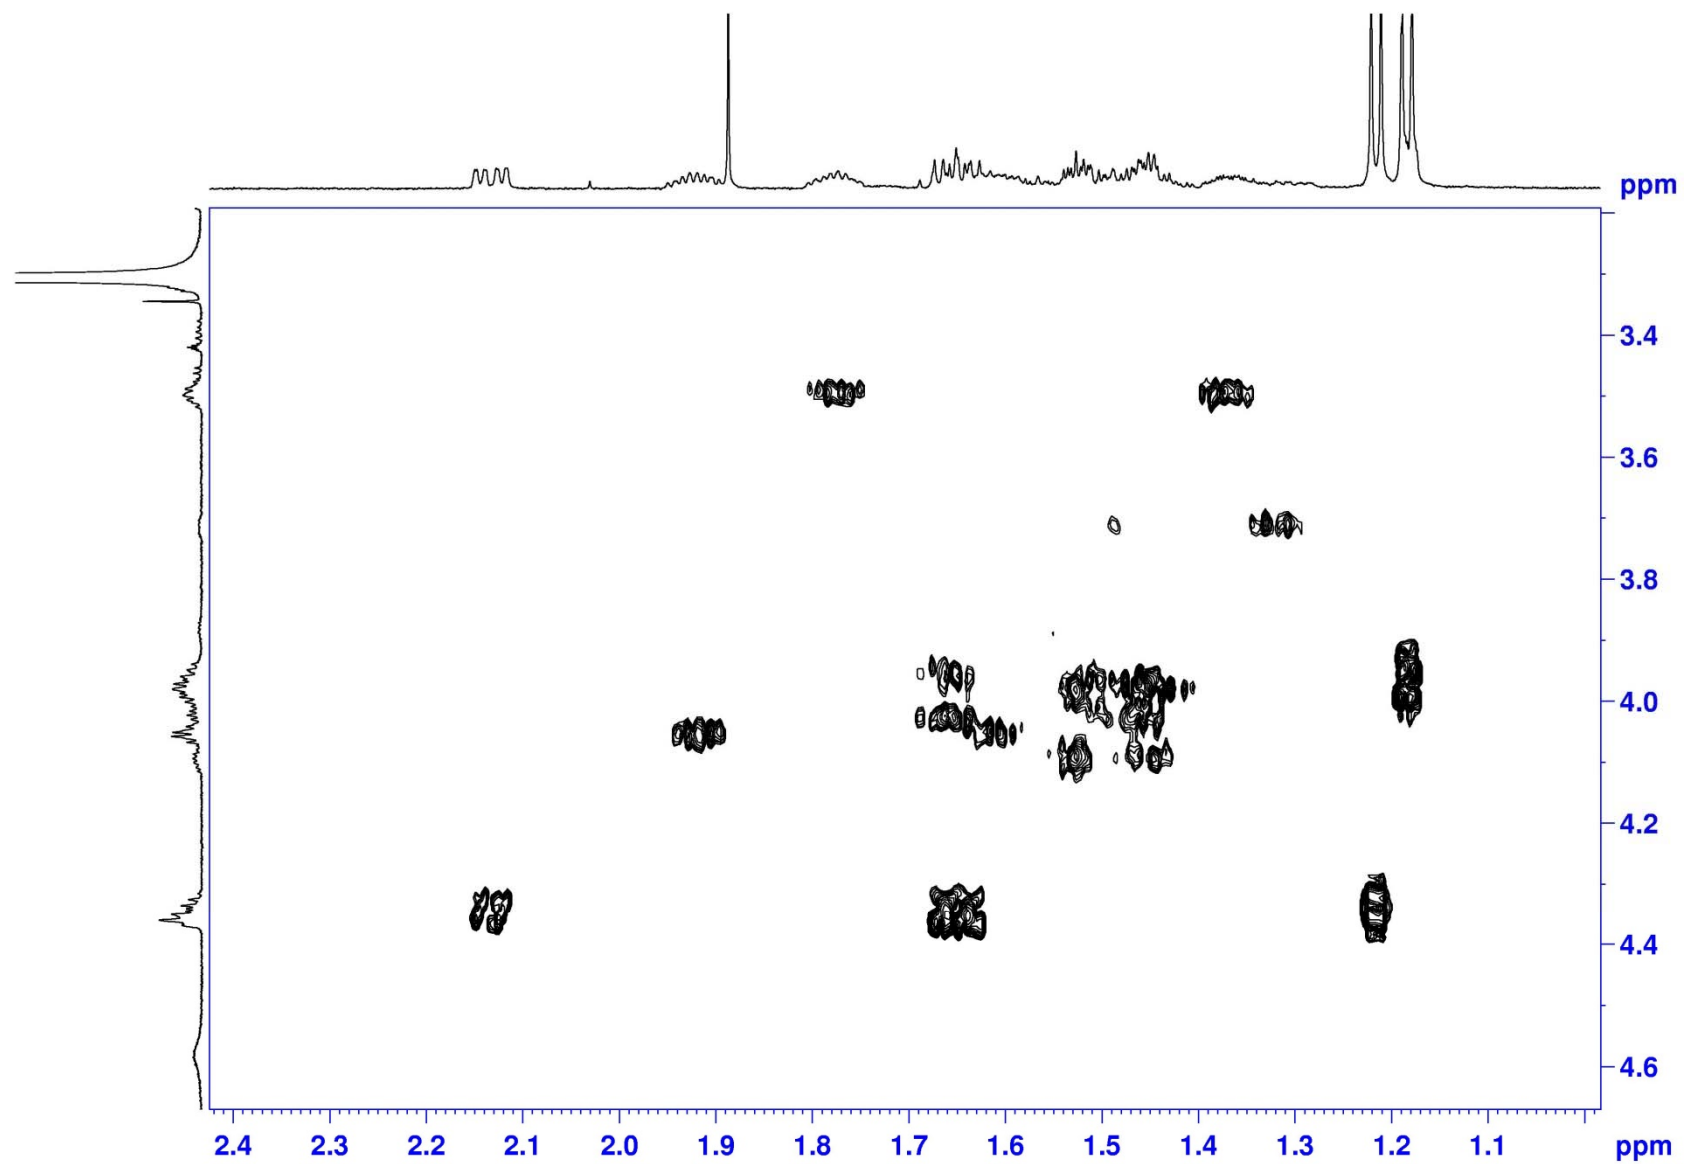

# HR-ESIMS for compound 1s

## Mass Spectrum SmartFormula Report

### Analysis Info

Analysis Name D:\Data\MS\data\202011\jiangzhongping\_37-1-R\_pos\_3\_01\_9232.d  
 Method LC\_Direct Infusion\_pos\_100-3000mz.m  
 Sample Name jiangzhongping\_37-1-R\_pos  
 Comment

Acquisition Date 11/16/2020 4:13:55 PM

Operator SCSIO  
 Instrument maXis 255552.00029

### Acquisition Parameter

|             |          |                      |          |                  |           |
|-------------|----------|----------------------|----------|------------------|-----------|
| Source Type | ESI      | Ion Polarity         | Positive | Set Nebulizer    | 0.4 Bar   |
| Focus       | Active   | Set Capillary        | 4500 V   | Set Dry Heater   | 180 °C    |
| Scan Begin  | 100 m/z  | Set End Plate Offset | 0 V      | Set Dry Gas      | 4.0 l/min |
| Scan End    | 3500 m/z | Set Charging Voltage | 0 V      | Set Divert Valve | Waste     |
|             |          | Set Corona           | 0 nA     | Set APCI Heater  | 0 °C      |

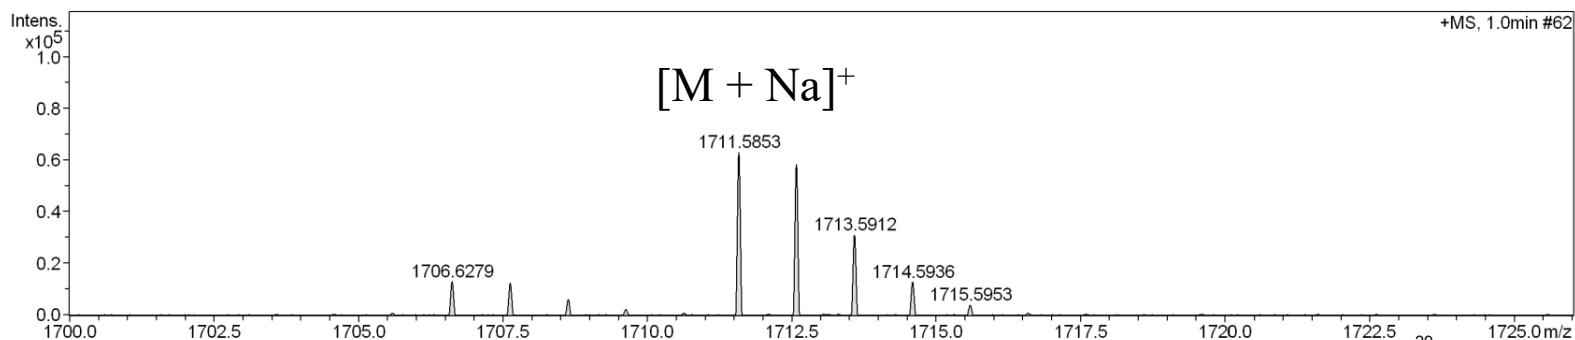

| Meas. m/z | # | Ion Formula    | Score  | m/z       | err [ppm] | err [mDa] | mSigma | rdb  | e <sup>-</sup> Conf | N-Rule |
|-----------|---|----------------|--------|-----------|-----------|-----------|--------|------|---------------------|--------|
| 1711.5853 | 1 | C84H91F15NaO19 | 100.00 | 1711.5807 | -2.7      | -4.6      | 22.5   | 31.5 | even                | ok     |

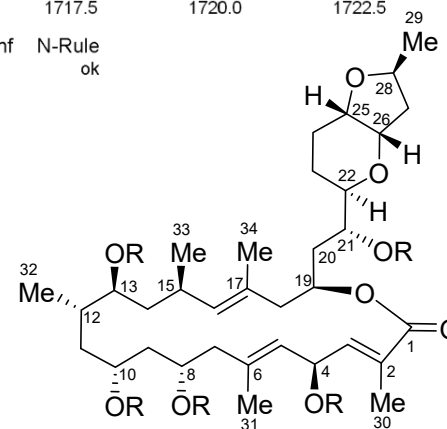

R = (S)-MTPA

S70

# HR-ESIMS for compound 1s

## Generic Display Report

### Analysis Info

Analysis Name D:\Data\MS\data\202011\jiangzhongping\_37-1-R\_pos\_3\_01\_9232.d  
Method LC\_Direct Infusion\_pos\_100-3000mz.m  
Sample Name jiangzhongping\_37-1-R\_pos  
Comment

Acquisition Date 11/16/2020 4:13:55 PM  
Operator SCSIO  
Instrument maXis

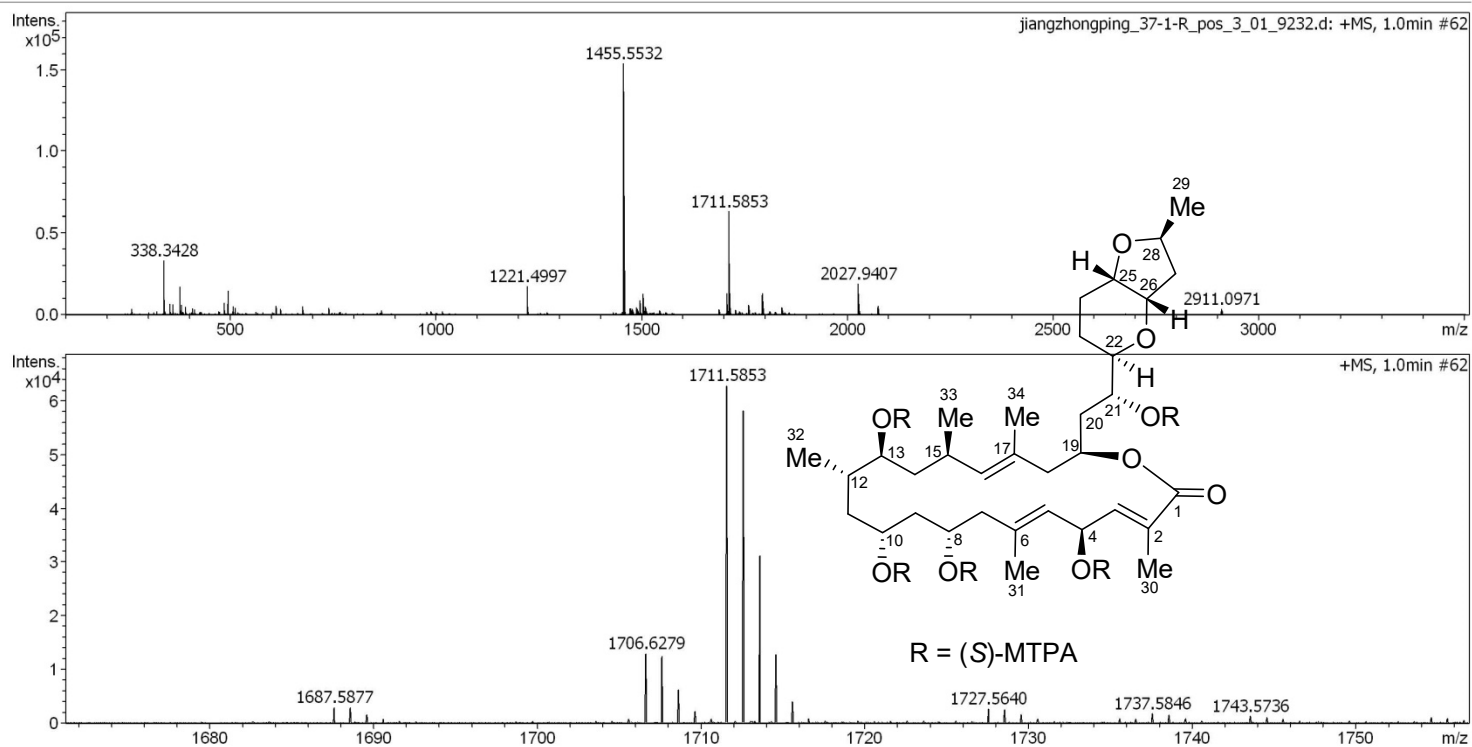

$^1\text{H}$  (400 MHz) NMR spectrum of compound **1s** in  $\text{CDCl}_3$

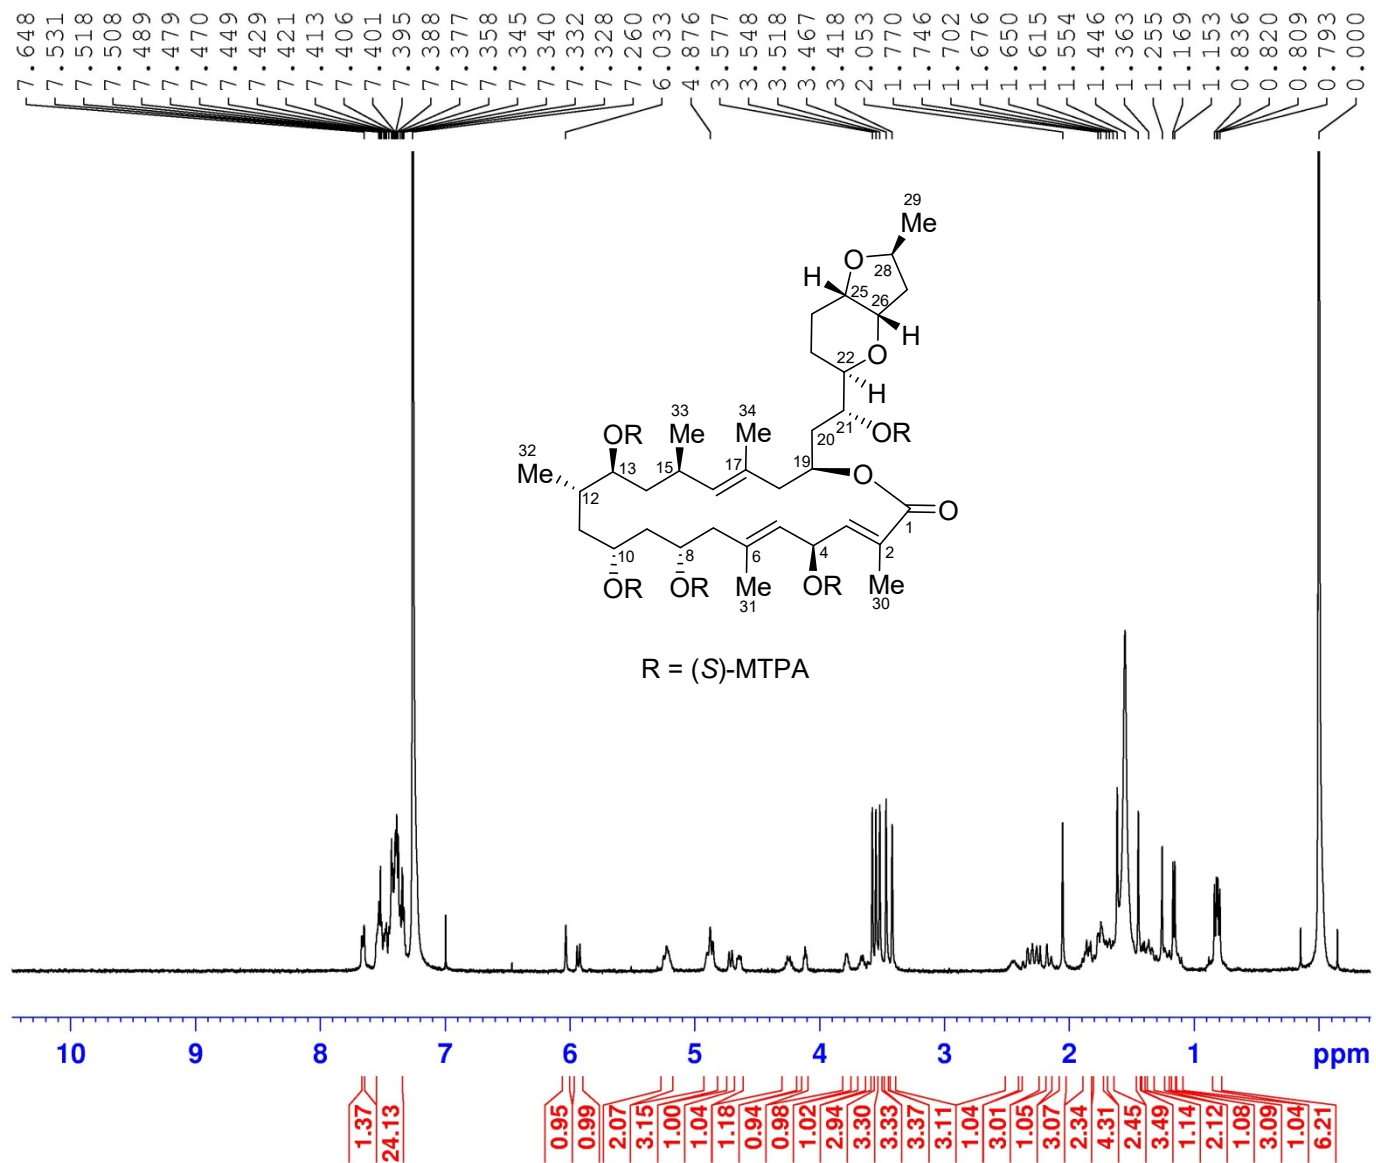



$^1\text{H}$  (400 MHz) NMR spectrum of compound **1s** in  $\text{CDCl}_3$

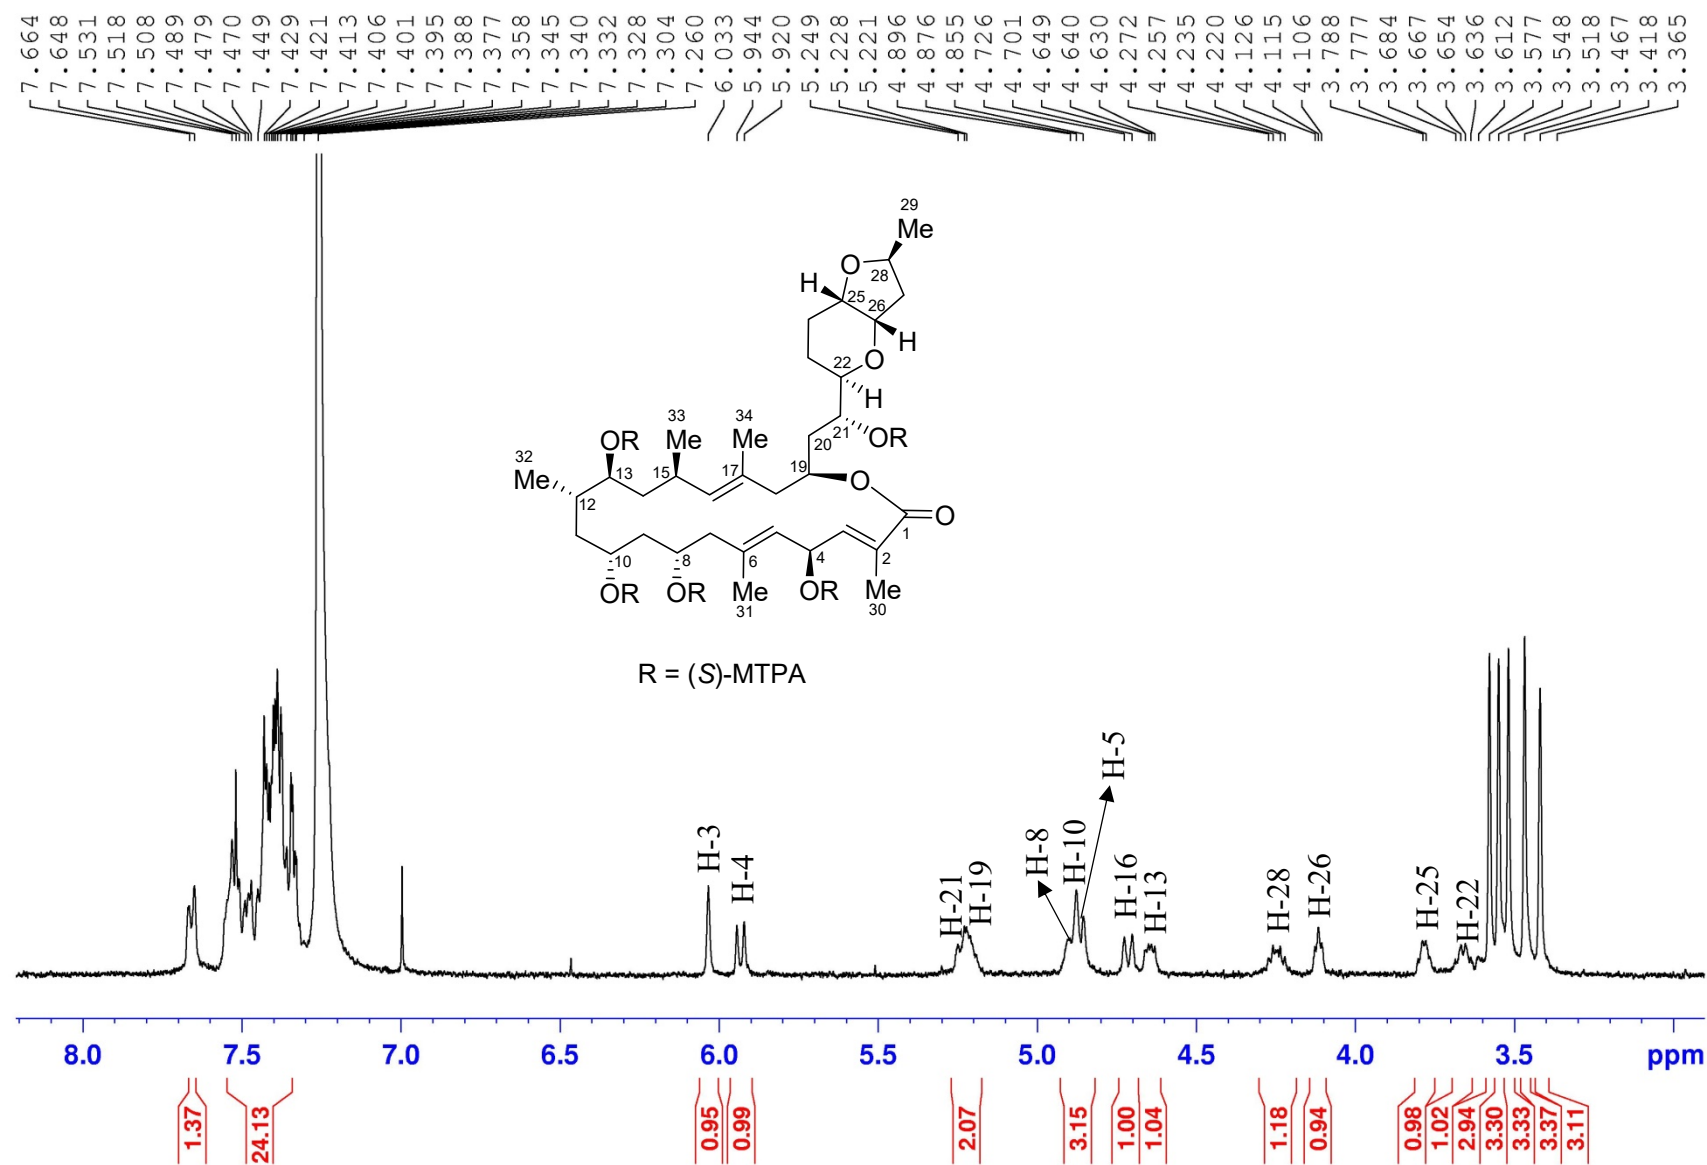

$^1\text{H}$  (400 MHz) NMR spectrum of compound **1s** in  $\text{CDCl}_3$

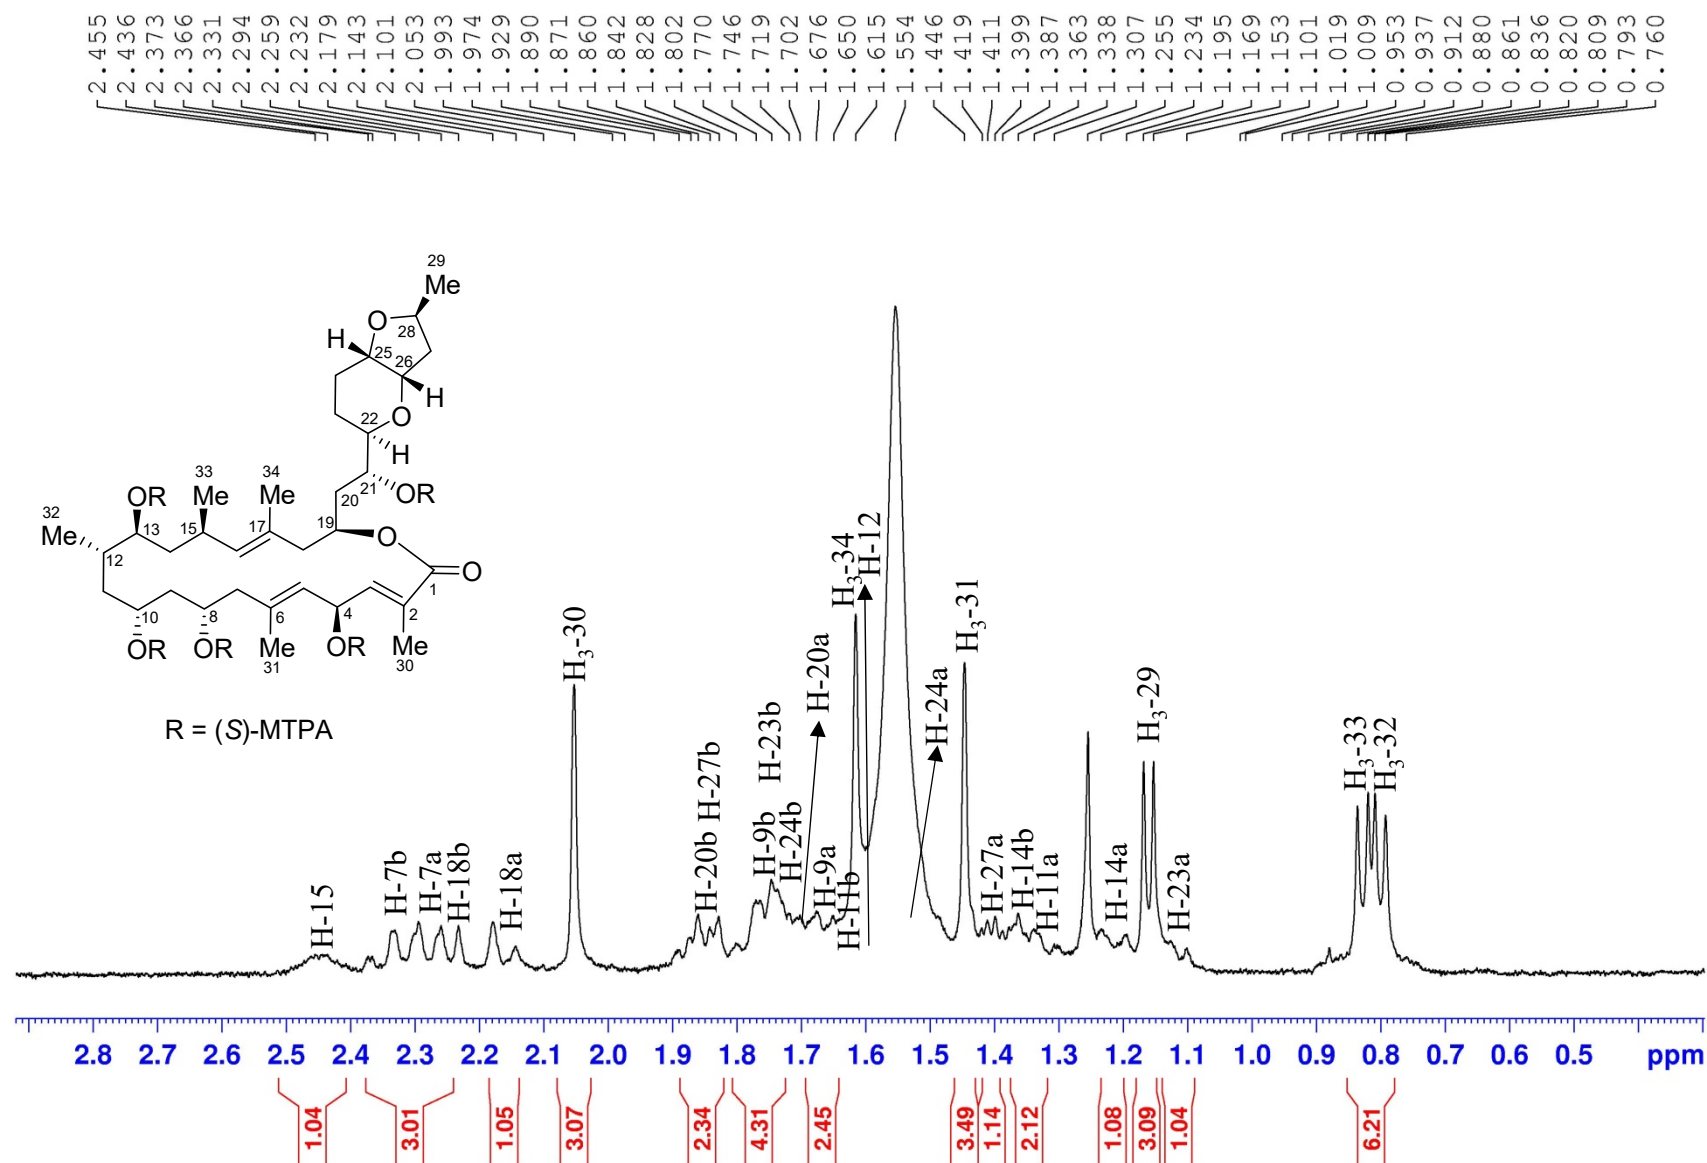

$^1\text{H}$ - $^1\text{H}$  COSY (400 MHz) spectrum of compound **1s** in  $\text{CDCl}_3$

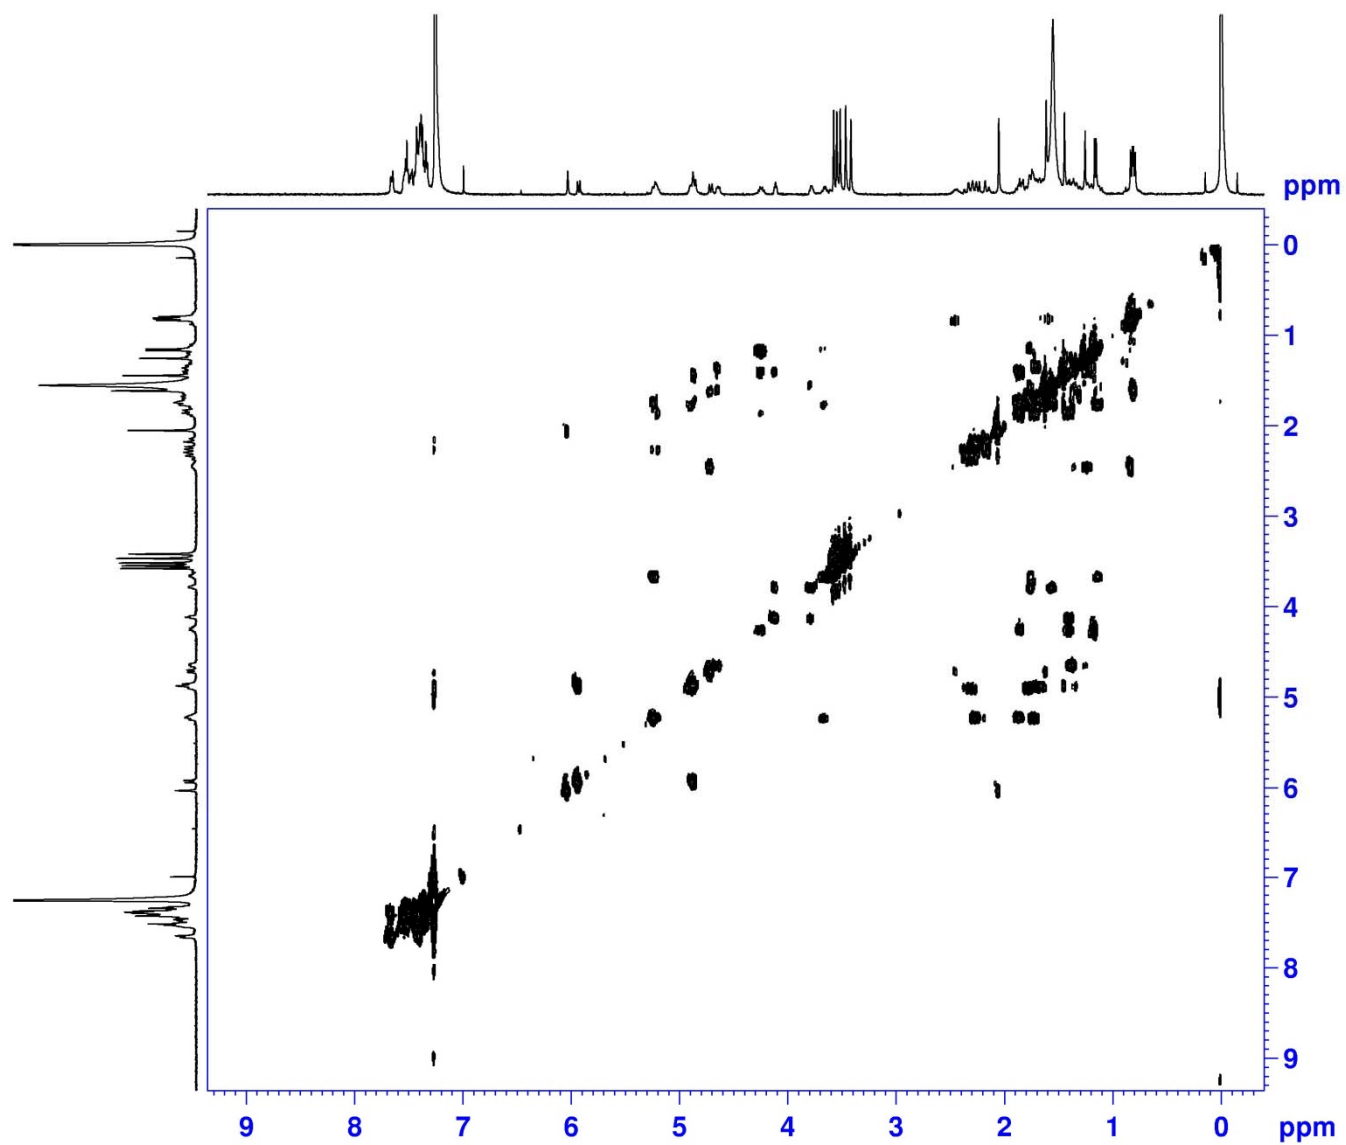

$^1\text{H}$ - $^1\text{H}$  COSY (400 MHz) spectrum of compound **1s** in  $\text{CDCl}_3$

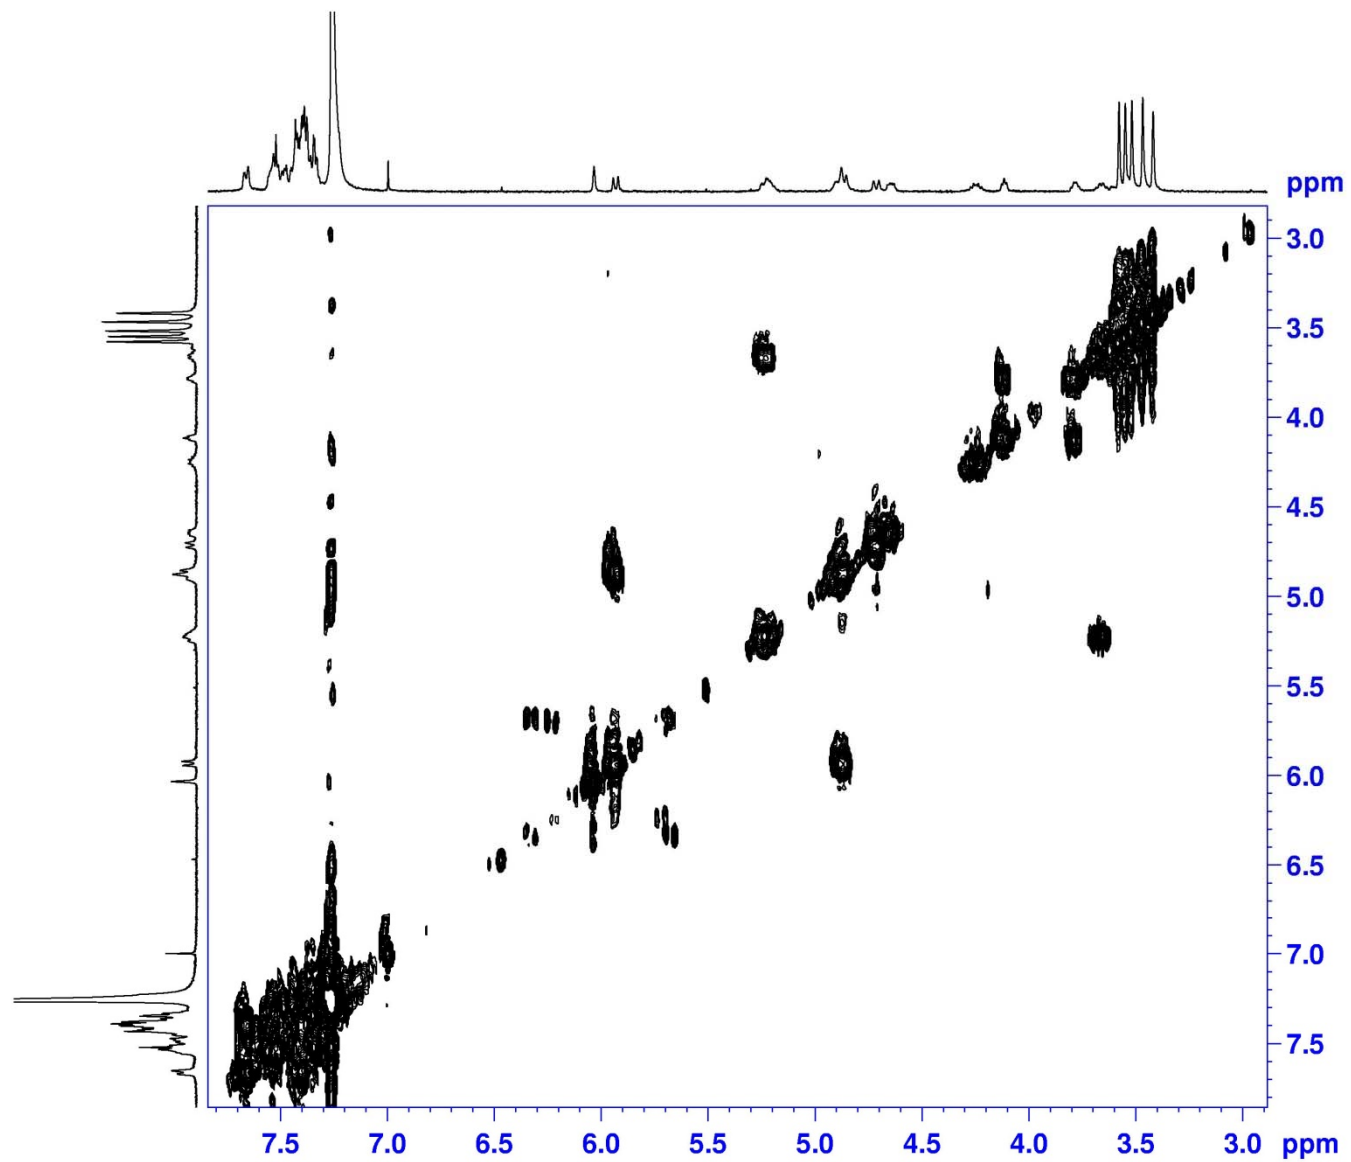

$^1\text{H}$ - $^1\text{H}$  COSY (400 MHz) spectrum of compound **1s** in  $\text{CDCl}_3$

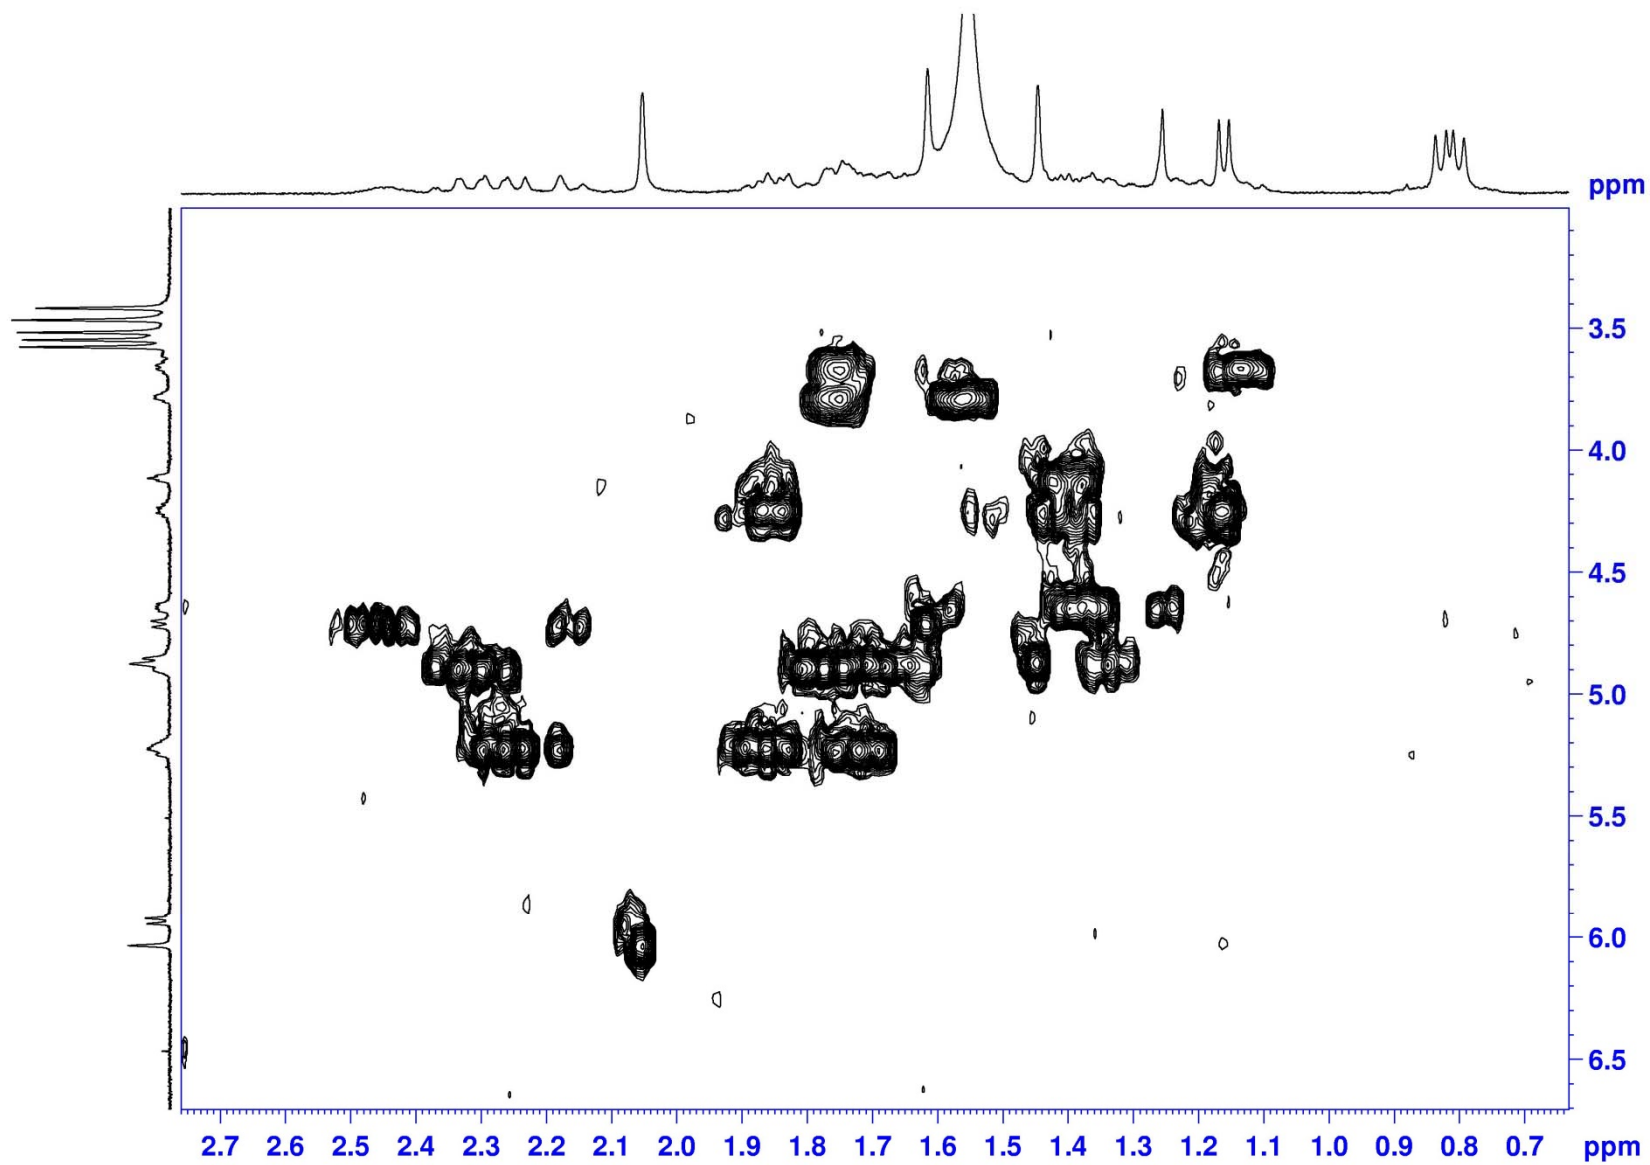

# HR-ESIMS for compound **1r**

## Mass Spectrum SmartFormula Report

### Analysis Info

Analysis Name D:\Data\MS\data\202011\jiangzhongping\_37-1-S\_pos\_4\_01\_9233.d  
 Method LC\_Direct Infusion\_pos\_100-3000mz.m  
 Sample Name jiangzhongping\_37-1-S\_pos  
 Comment

Acquisition Date 11/16/2020 4:17:22 PM  
 Operator SCSIO  
 Instrument maXis 255552.00029

### Acquisition Parameter

|             |          |                      |          |                  |           |
|-------------|----------|----------------------|----------|------------------|-----------|
| Source Type | ESI      | Ion Polarity         | Positive | Set Nebulizer    | 0.4 Bar   |
| Focus       | Active   | Set Capillary        | 4500 V   | Set Dry Heater   | 180 °C    |
| Scan Begin  | 100 m/z  | Set End Plate Offset | 0 V      | Set Dry Gas      | 4.0 l/min |
| Scan End    | 3500 m/z | Set Charging Voltage | 0 V      | Set Divert Valve | Waste     |
|             |          | Set Corona           | 0 nA     | Set APCI Heater  | 0 °C      |

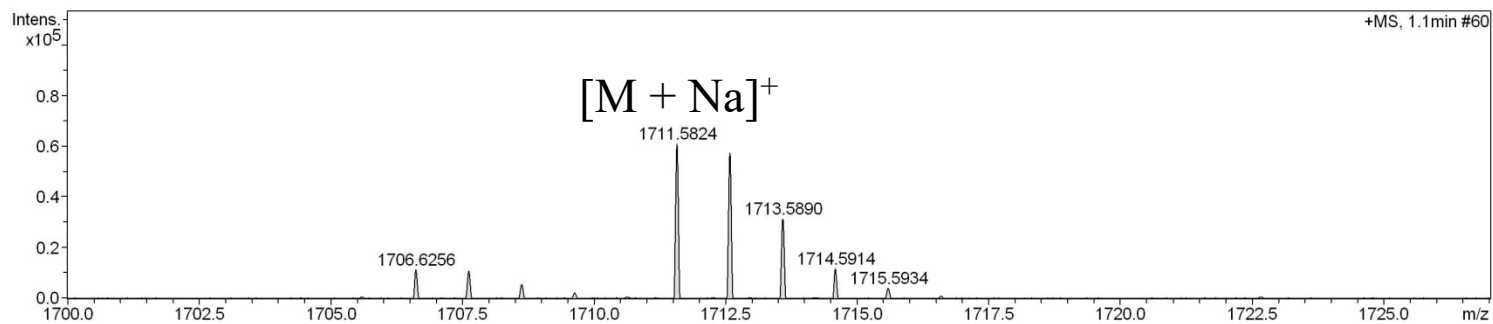

| Meas. m/z | # | Ion Formula    | Score  | m/z       | err [ppm] | err [mDa] | mSigma | rdb  | e <sup>-</sup> Conf | N-Rule |
|-----------|---|----------------|--------|-----------|-----------|-----------|--------|------|---------------------|--------|
| 1711.5824 | 1 | C84H91F15NaO19 | 100.00 | 1711.5807 | -1.0      | -1.7      | 26.8   | 31.5 | even                | ok     |

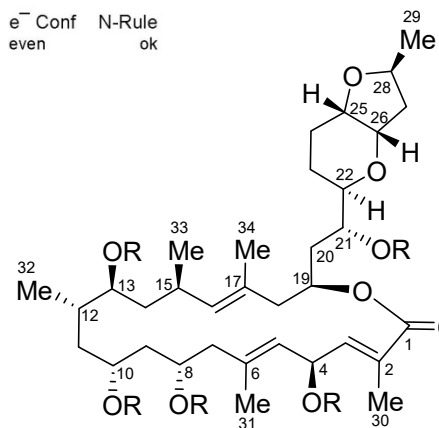

R = (R)-MTPA

# HR-ESIMS for compound 1r

## Generic Display Report

### Analysis Info

Analysis Name D:\Data\MS\data\202011\jiangzhongping\_37-1-S\_pos\_4\_01\_9233.d  
Method LC\_Direct Infusion\_pos\_100-3000mz.m  
Sample Name jiangzhongping\_37-1-S\_pos  
Comment

Acquisition Date 11/16/2020 4:17:22 PM  
Operator SCSIO  
Instrument maXis

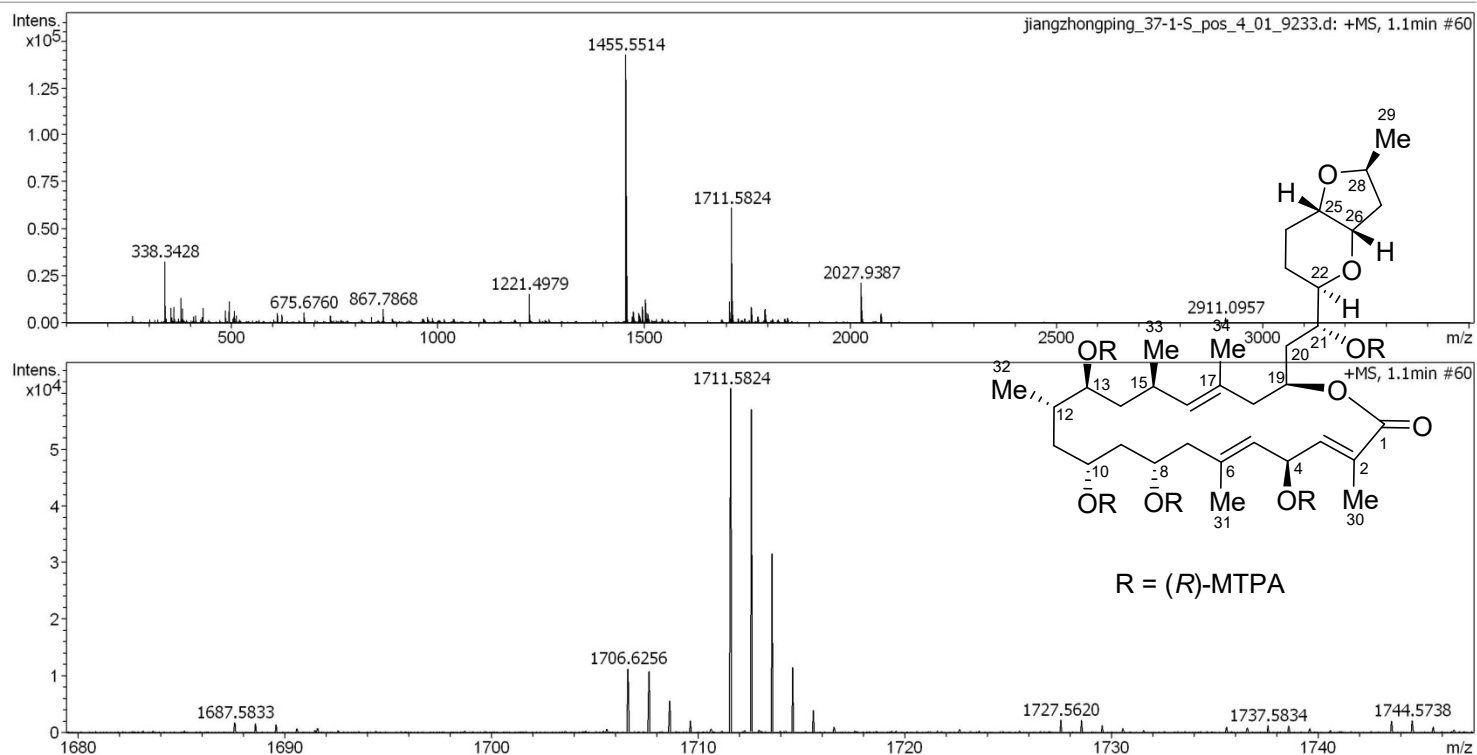

$^1\text{H}$  (400 MHz) NMR spectrum of compound **1r** in  $\text{CDCl}_3$

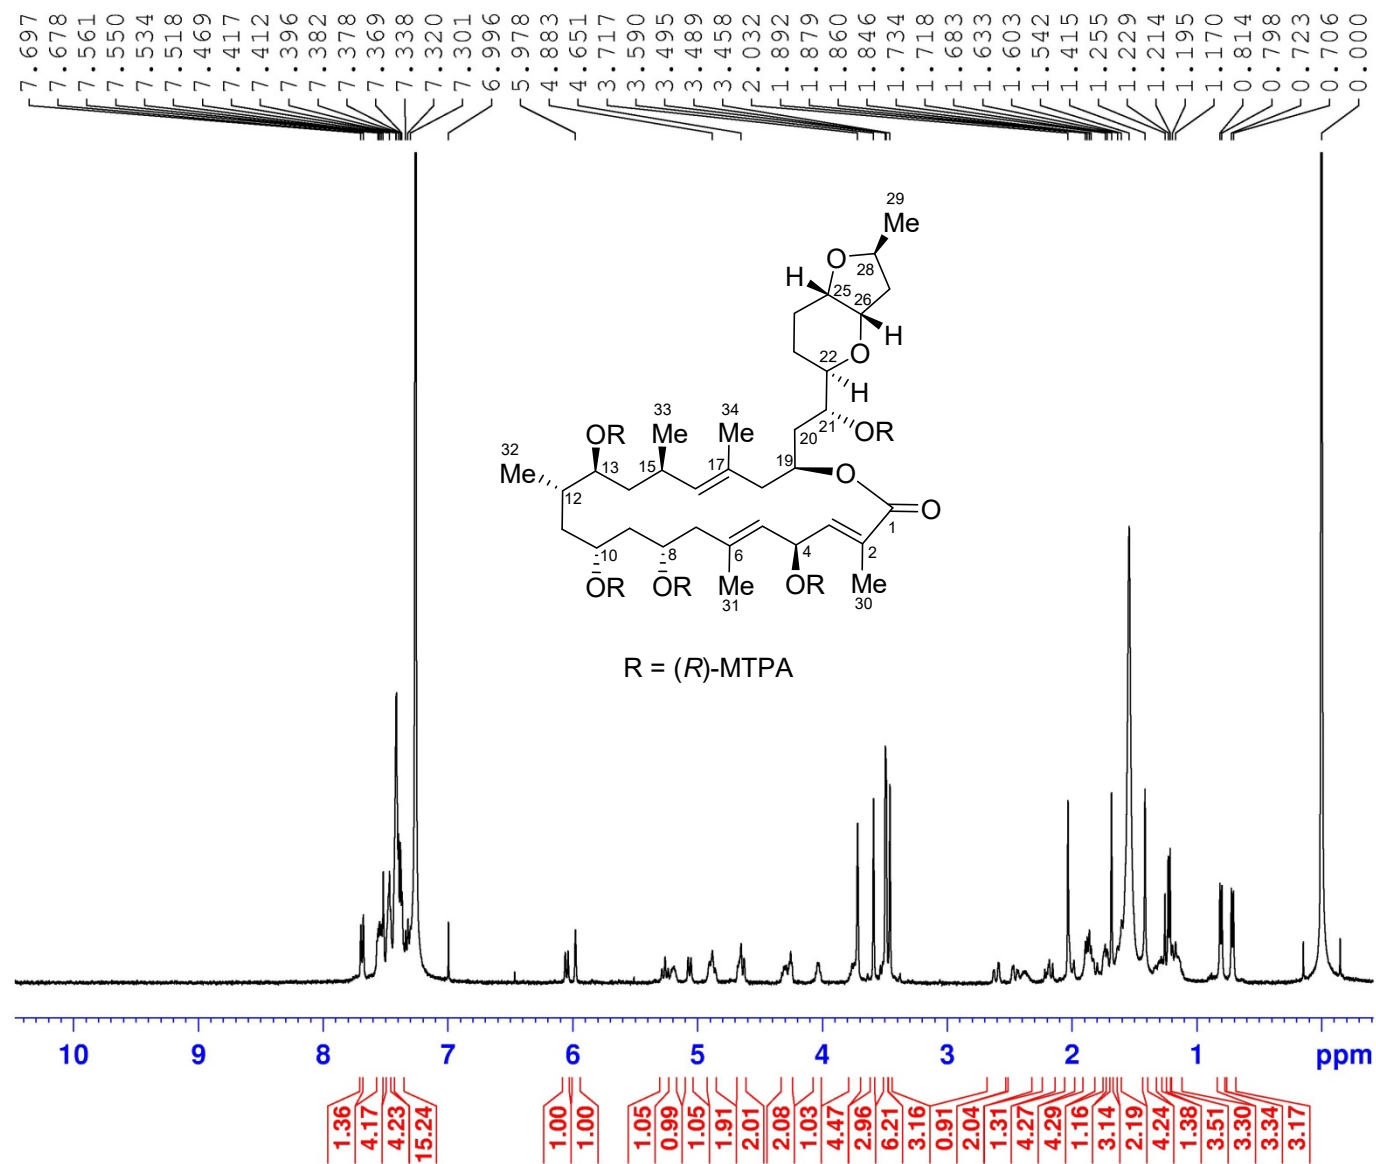



$^1\text{H}$  (400 MHz) NMR spectrum of compound **1r** in  $\text{CDCl}_3$

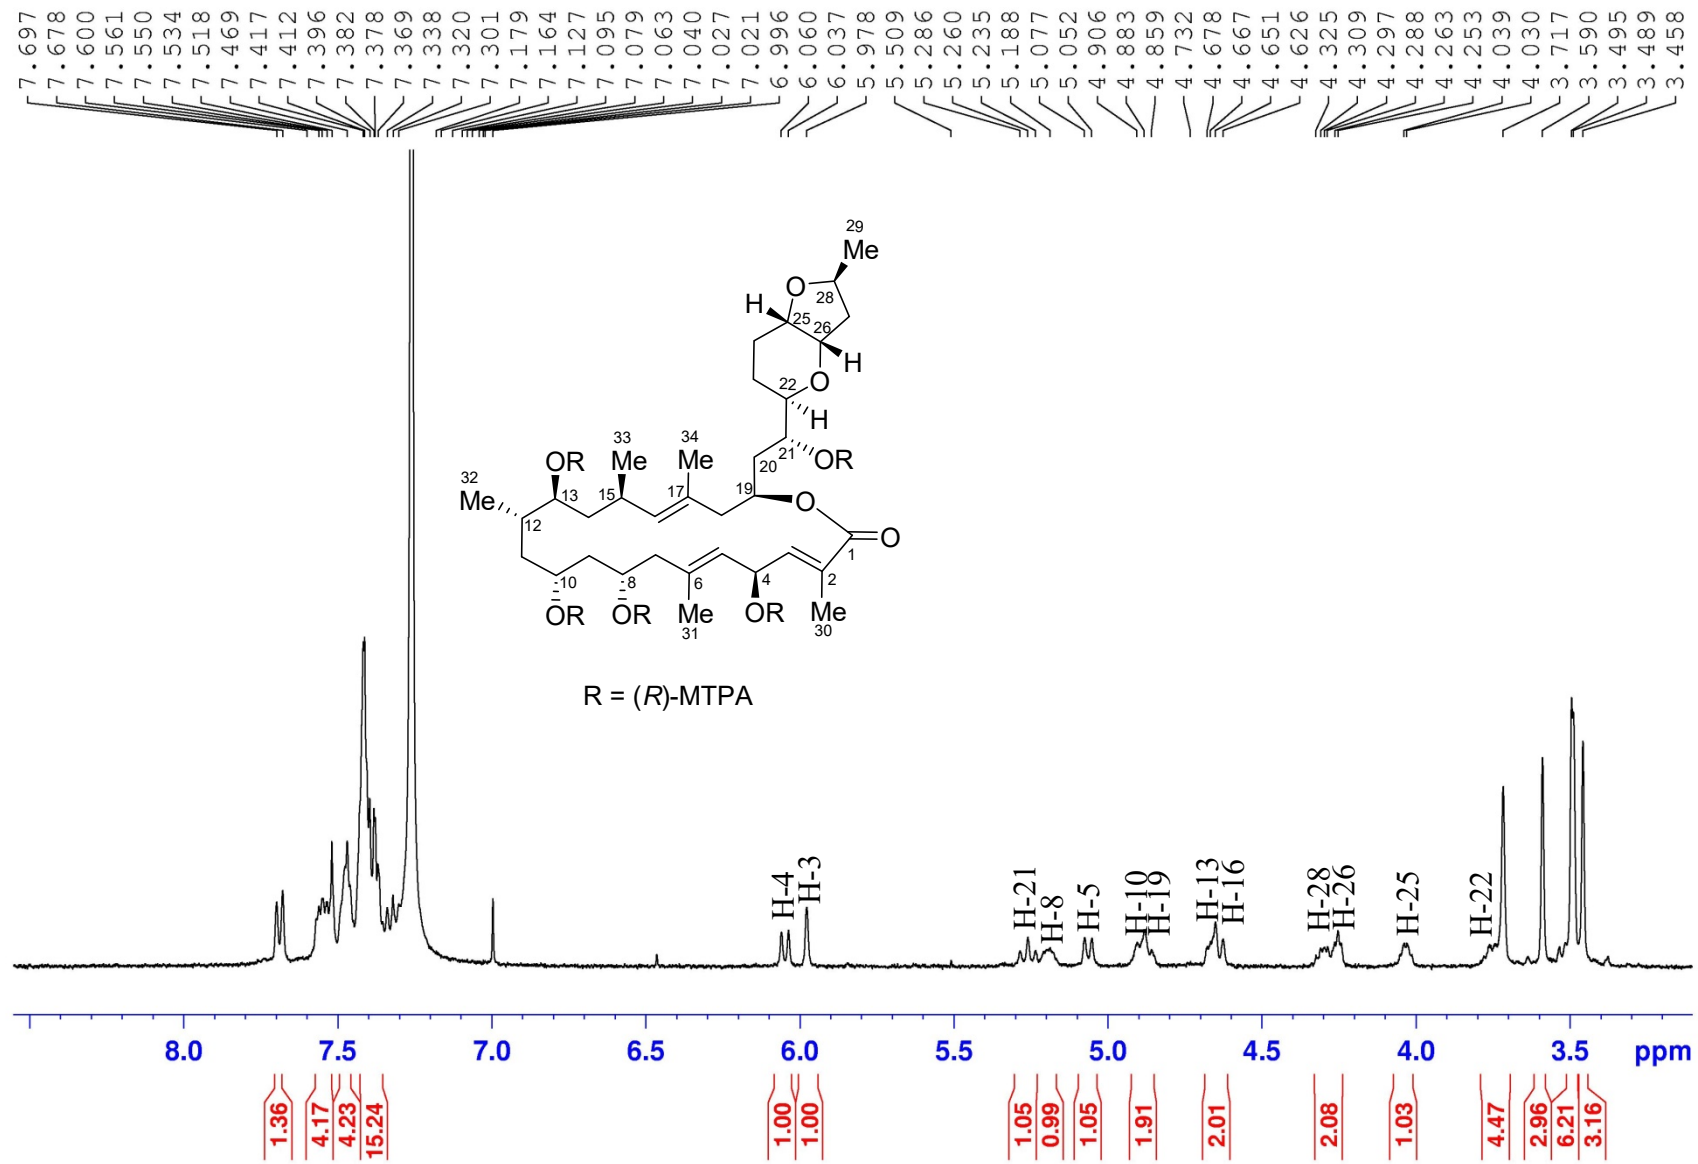

$^1\text{H}$  (400 MHz) NMR spectrum of compound **1r** in  $\text{CDCl}_3$

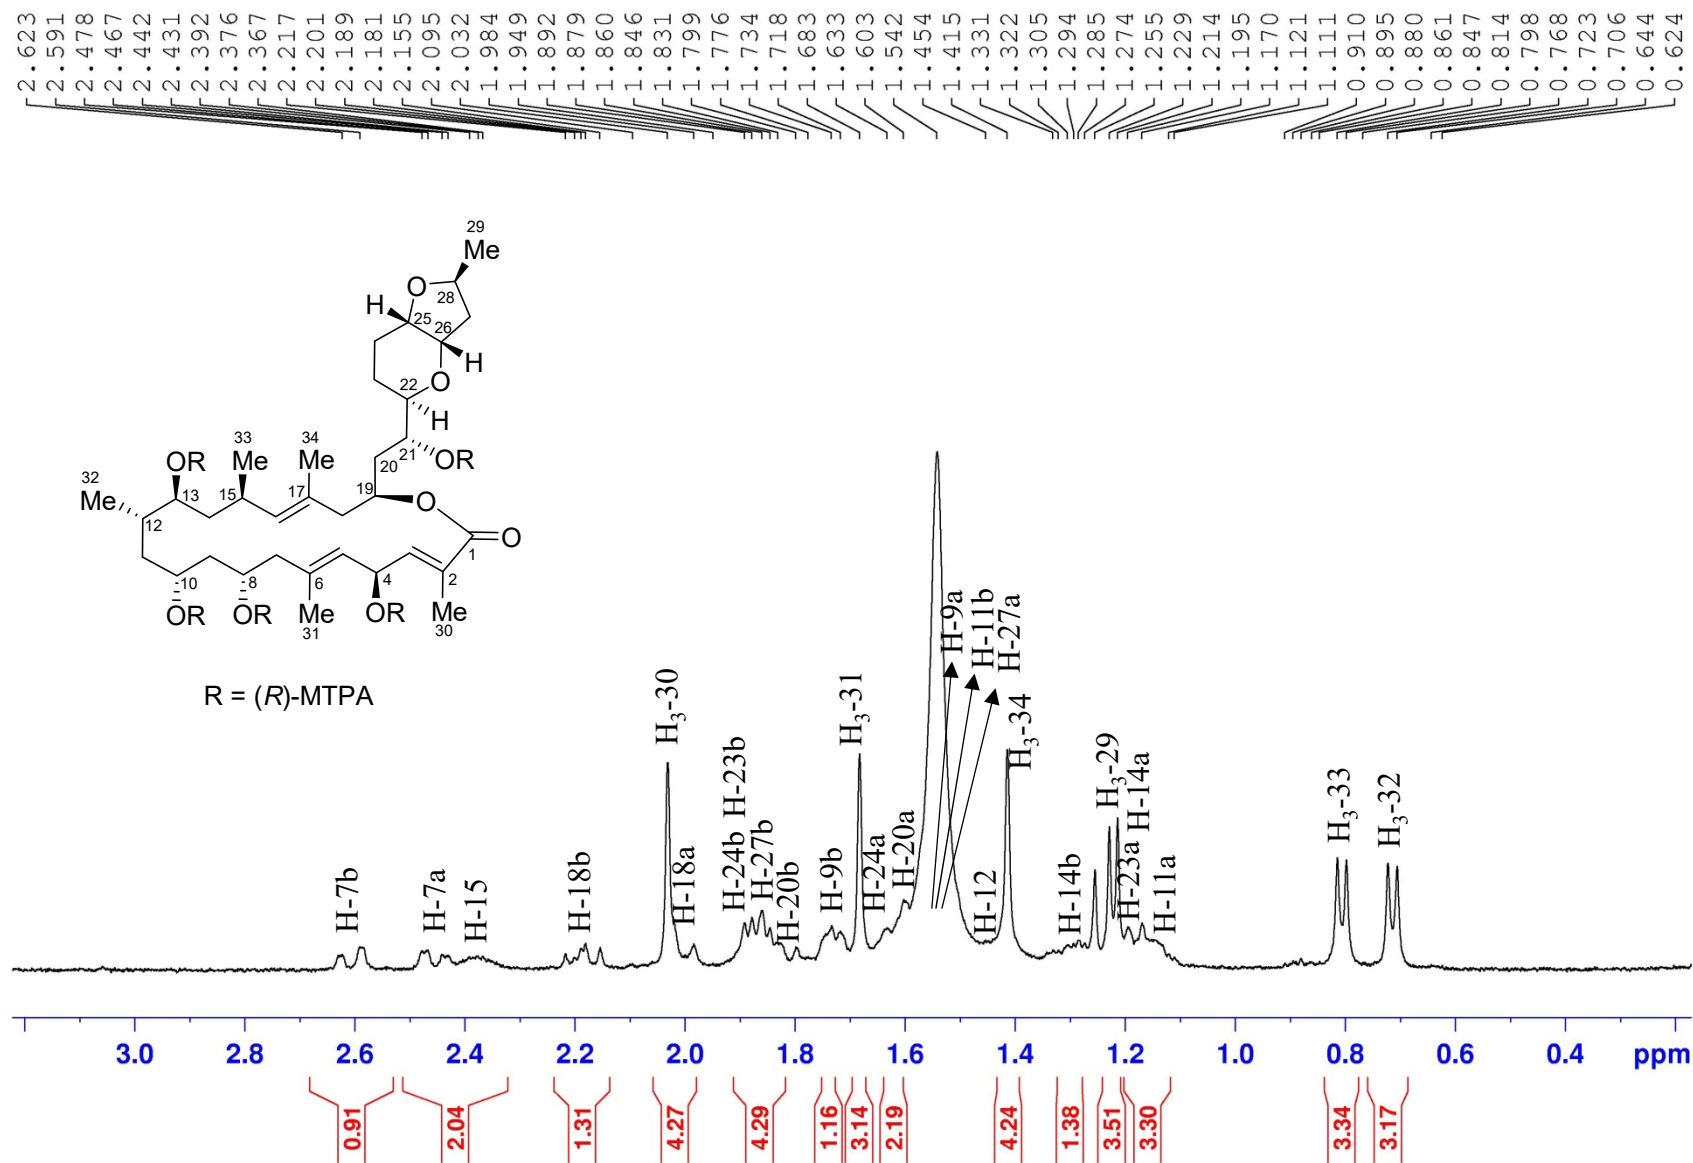

$^1\text{H}$ - $^1\text{H}$  COSY (400 MHz) spectrum of compound **1r** in  $\text{CDCl}_3$

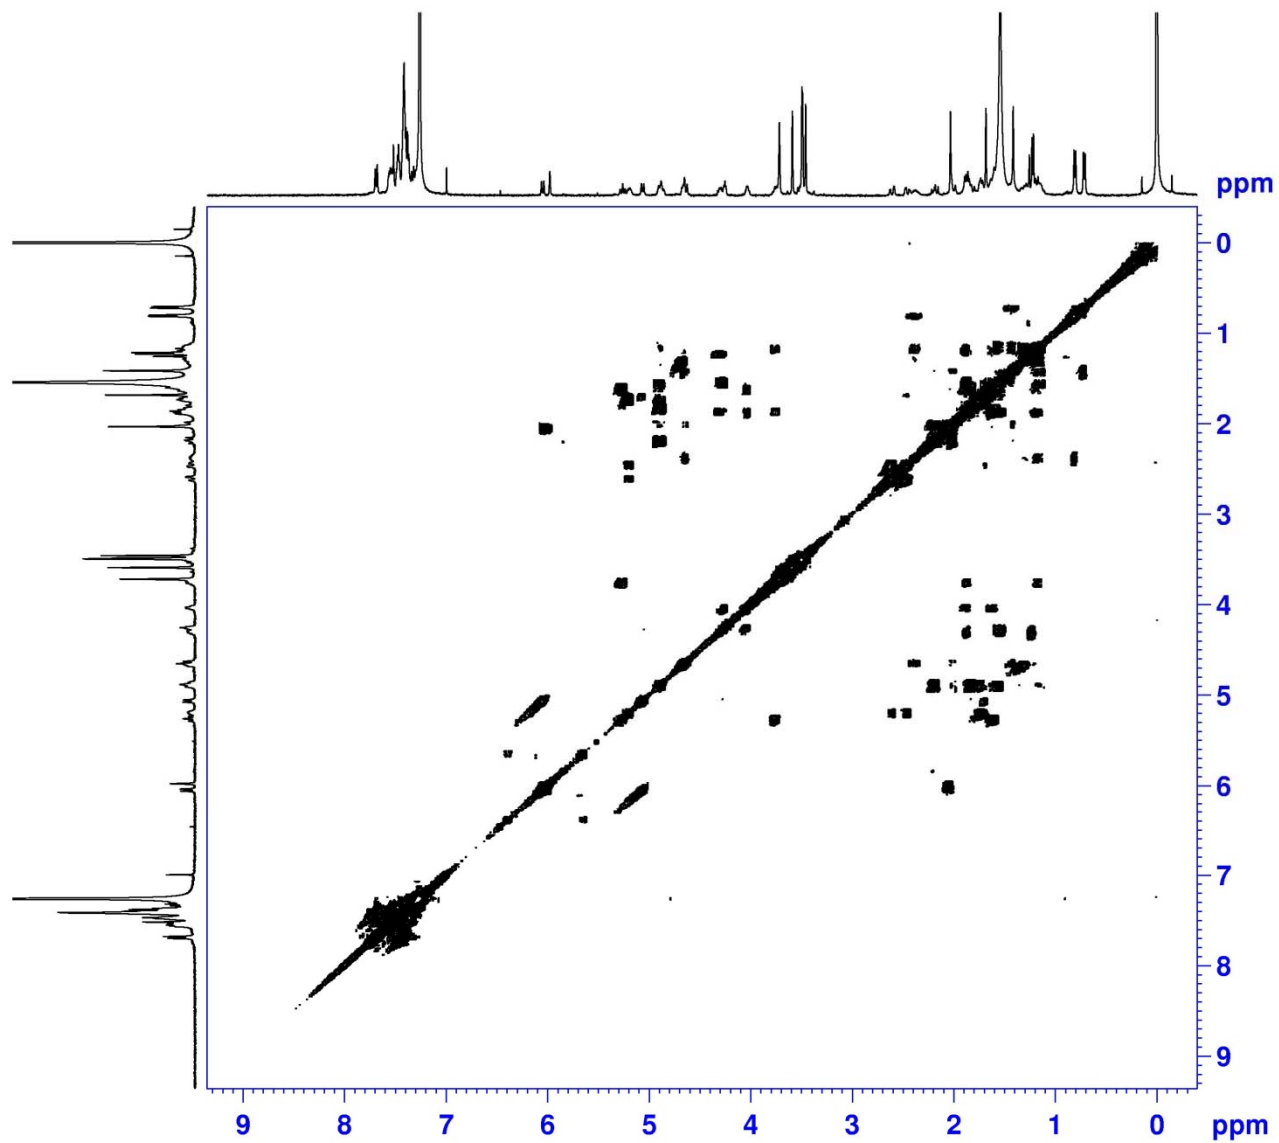

$^1\text{H}$ - $^1\text{H}$  COSY (400 MHz) spectrum of compound **1r** in  $\text{CDCl}_3$

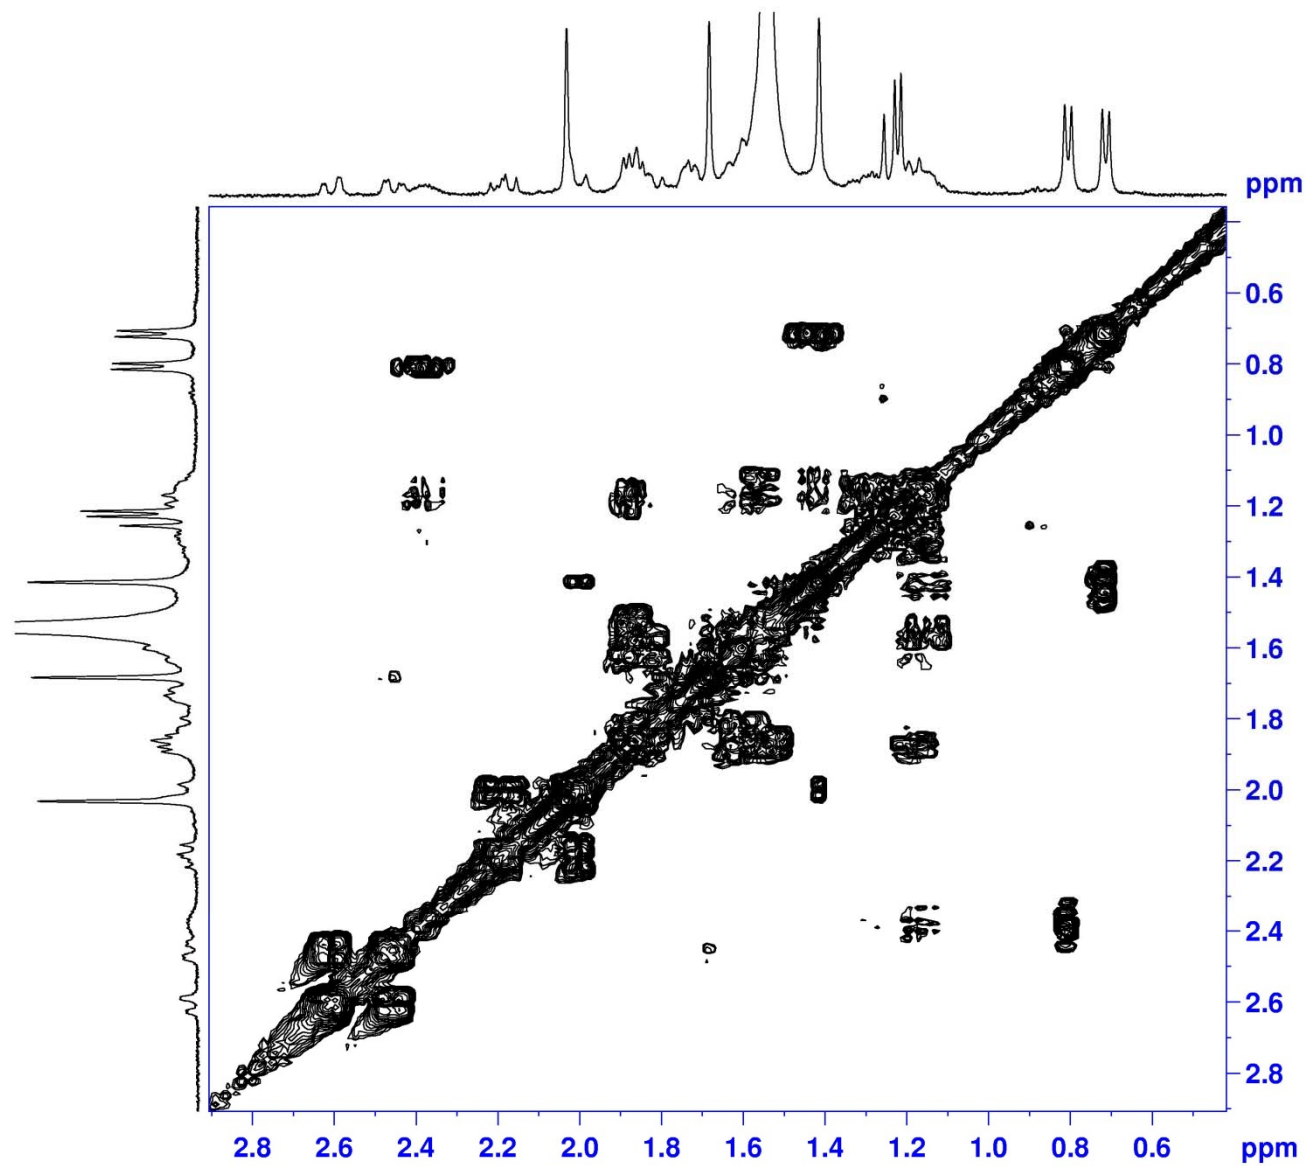

$^1\text{H}$ - $^1\text{H}$  COSY (400 MHz) spectrum of compound **1r** in  $\text{CDCl}_3$

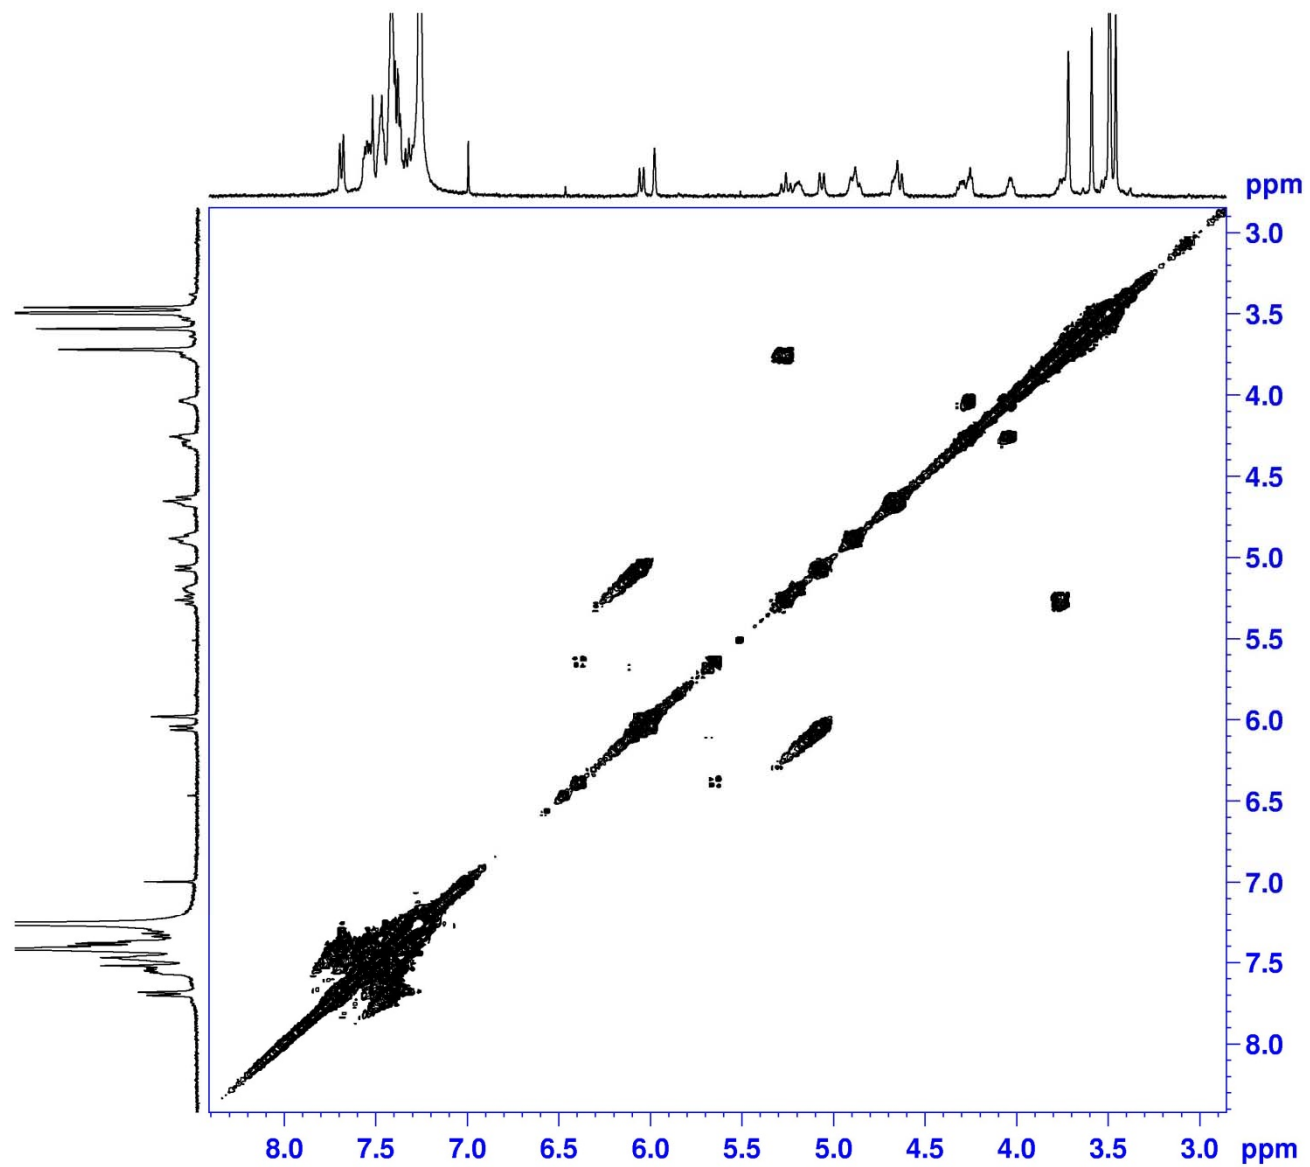

$^1\text{H}$ - $^1\text{H}$  COSY (400 MHz) spectrum of compound **1r** in  $\text{CDCl}_3$

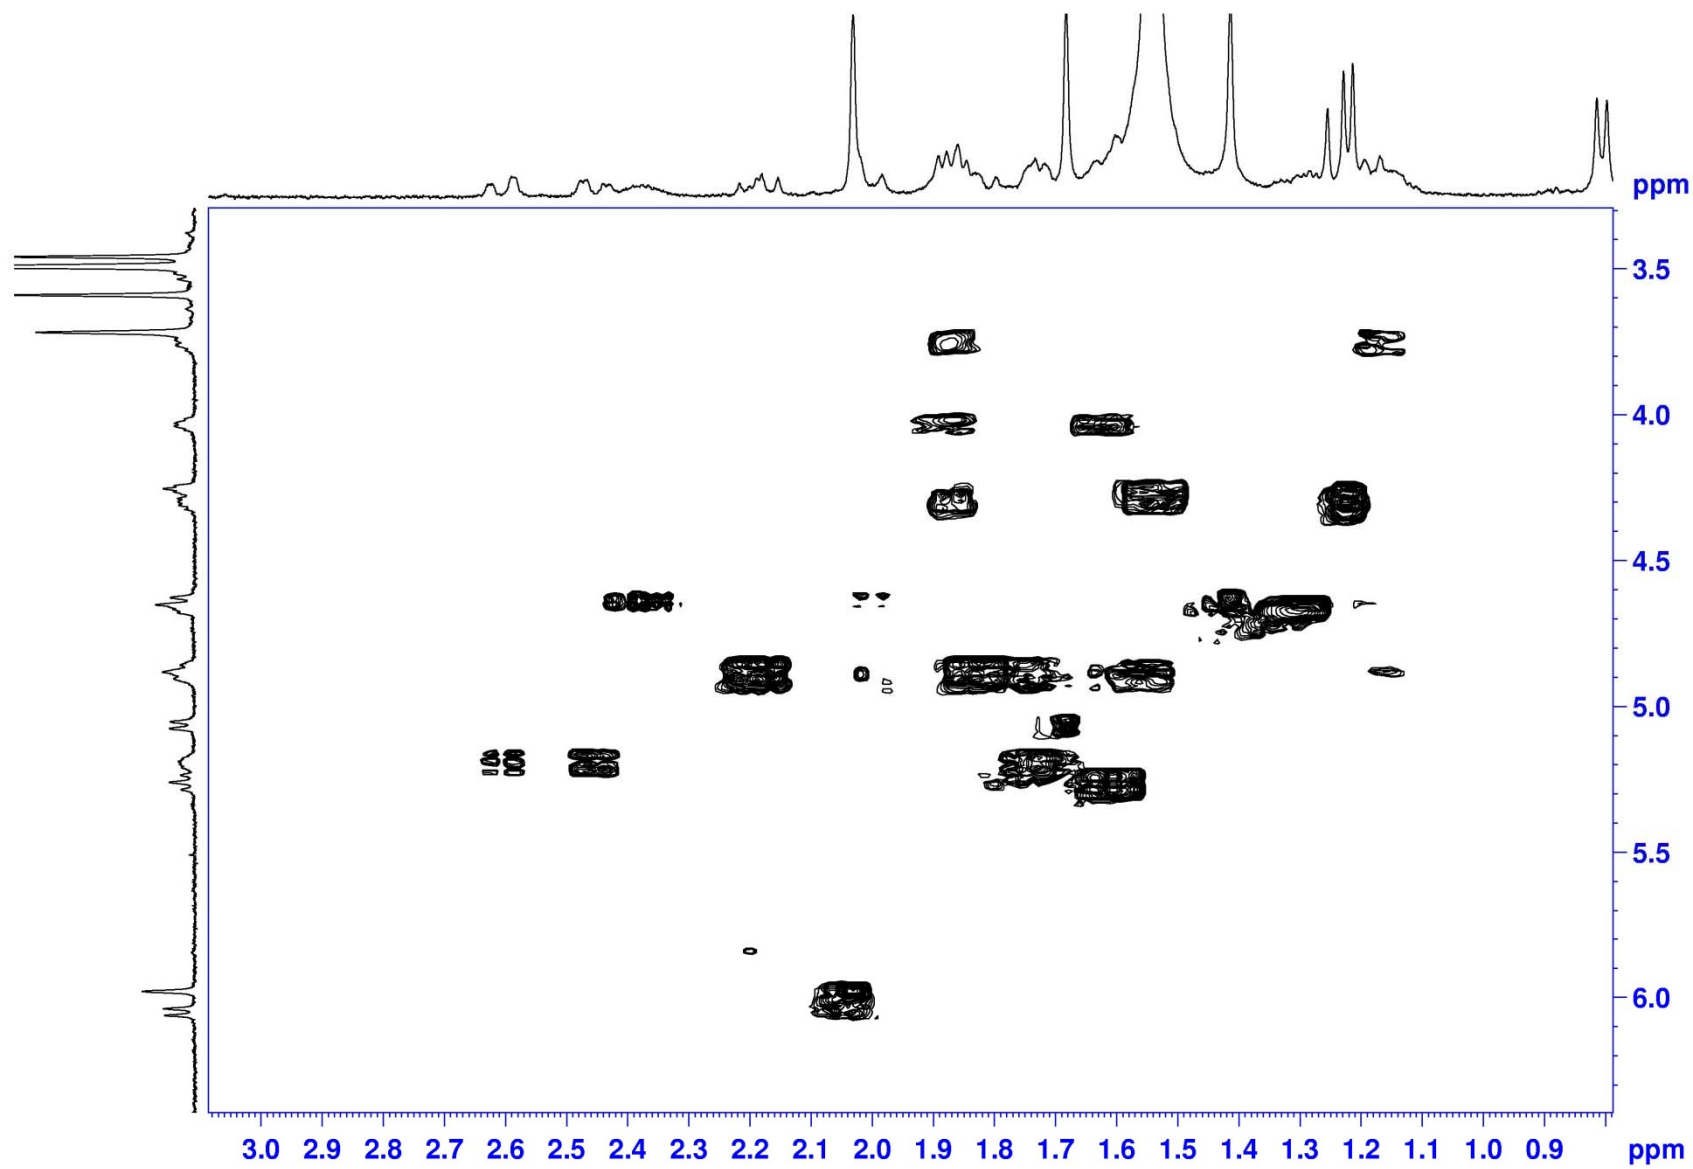

# LR-ESIMS for the fragment 1As

## Generic Display Report

### Analysis Info

Analysis Name D:\Data\amaZon SL\MS\data\202011\jiangzhongping\_37-1-O3-2-S-1\_98\_01\_2315.d  
Method 2315.m  
Sample Name jiangzhongping\_37-1-O3-2-S-1  
Comment

Acquisition Date 2020-11-09 15:57:29

Operator bruker

Instrument amaZon SL

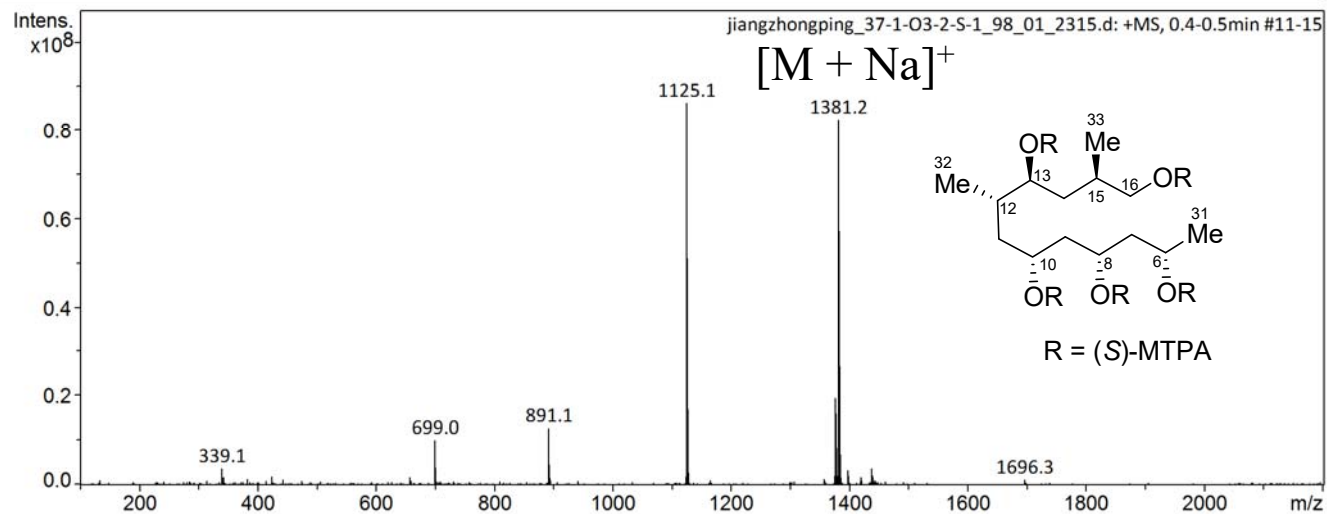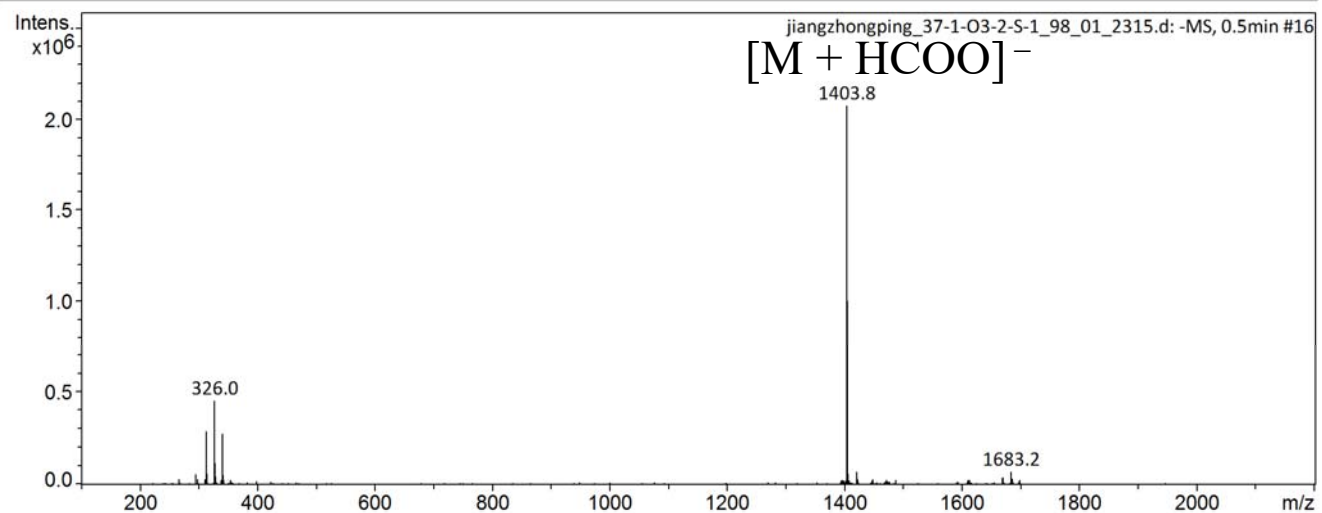

# $^1\text{H}$ (700 MHz) NMR spectrum of the fragment **1As** in $\text{CD}_3\text{OD}$

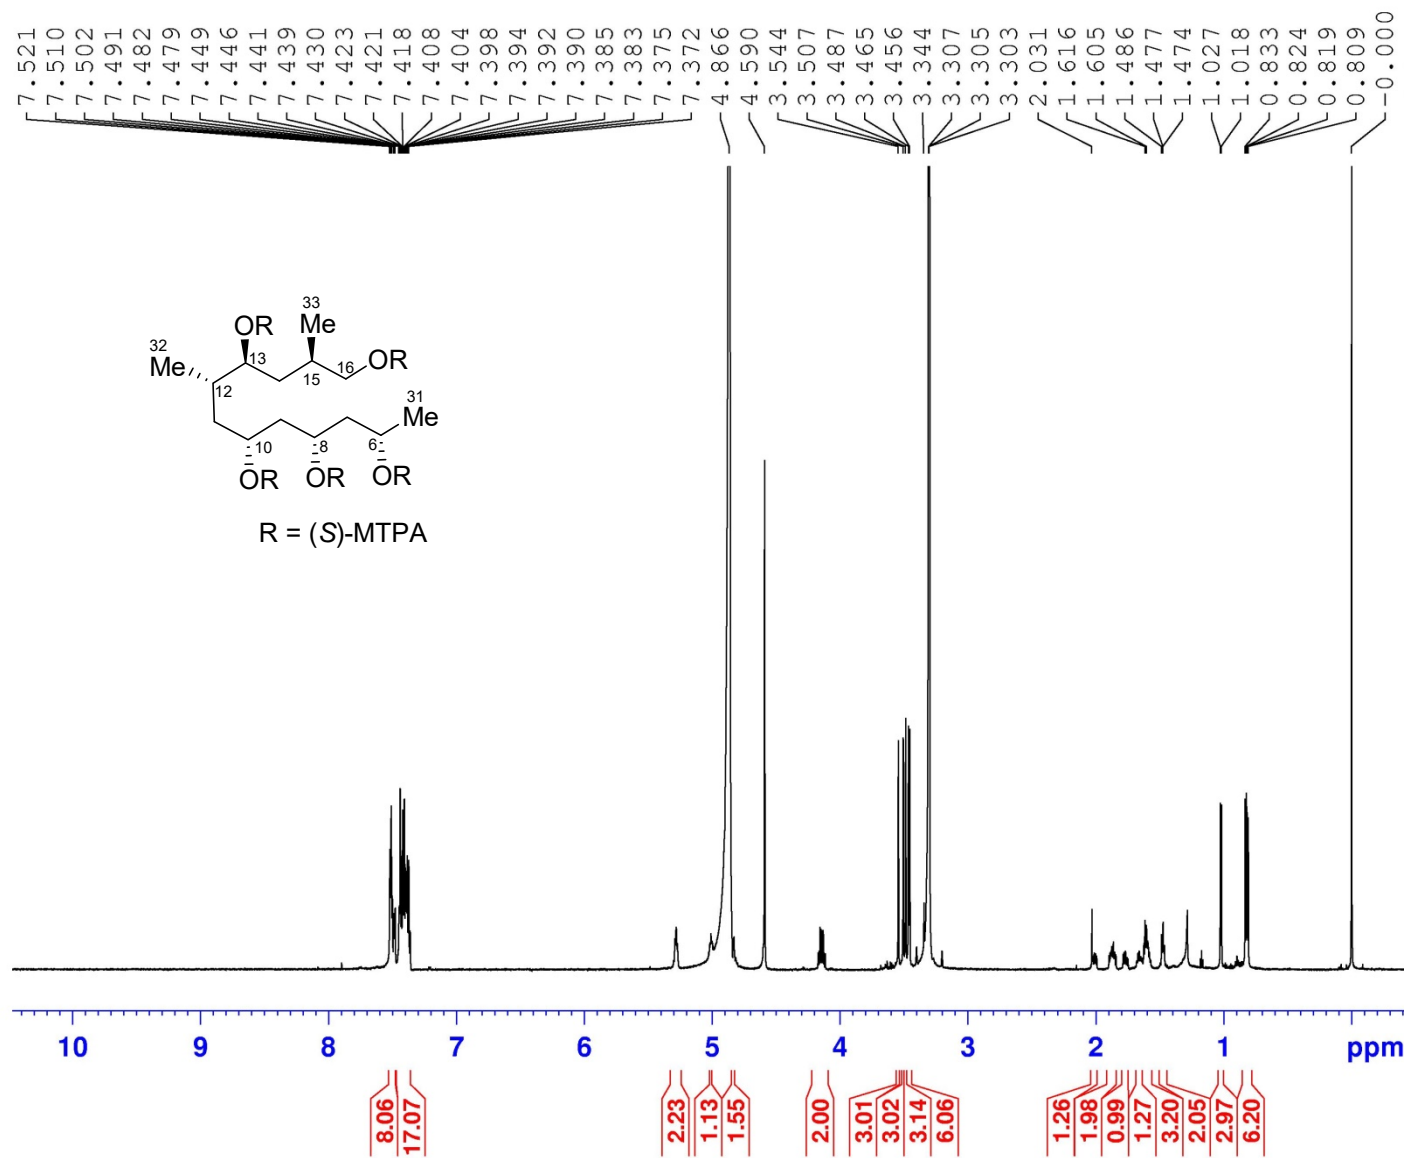



<sup>1</sup>H (700 MHz) NMR spectrum of the fragment **1As** in CD<sub>3</sub>OD

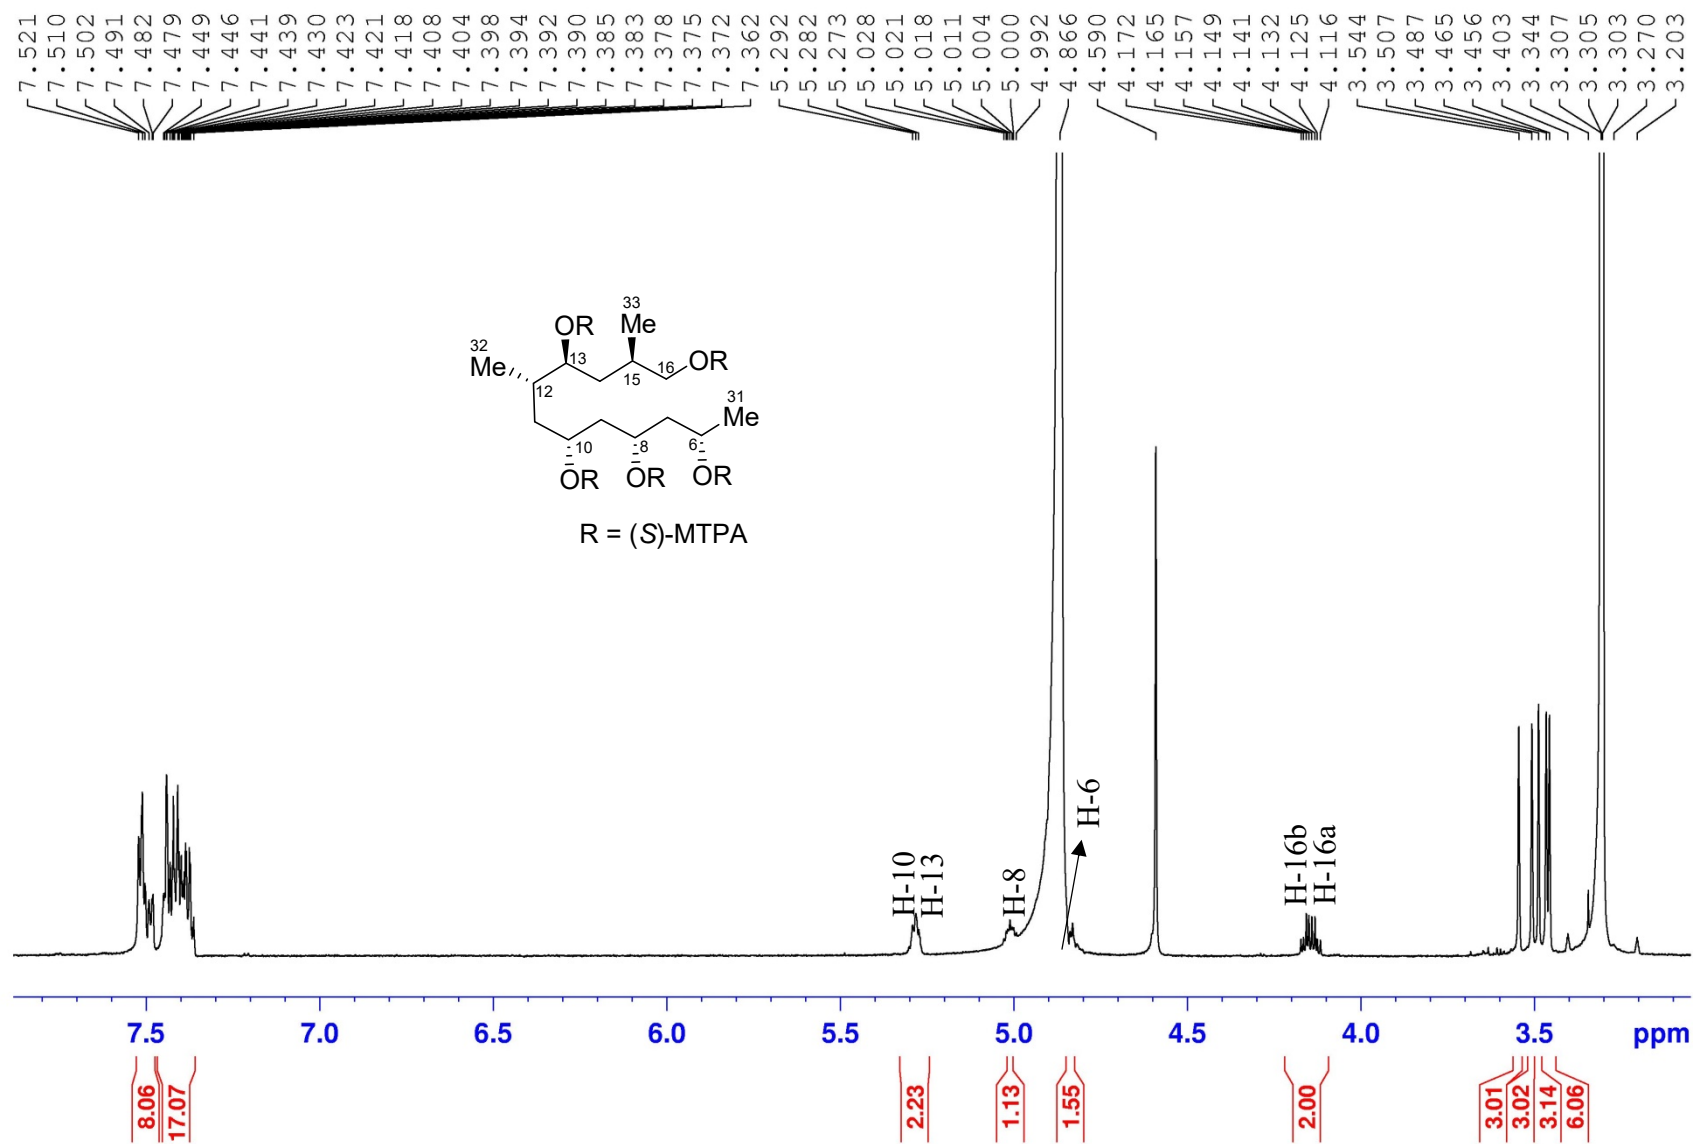

# $^1\text{H}$ (700 MHz) NMR spectrum of the fragment **1As** in $\text{CD}_3\text{OD}$

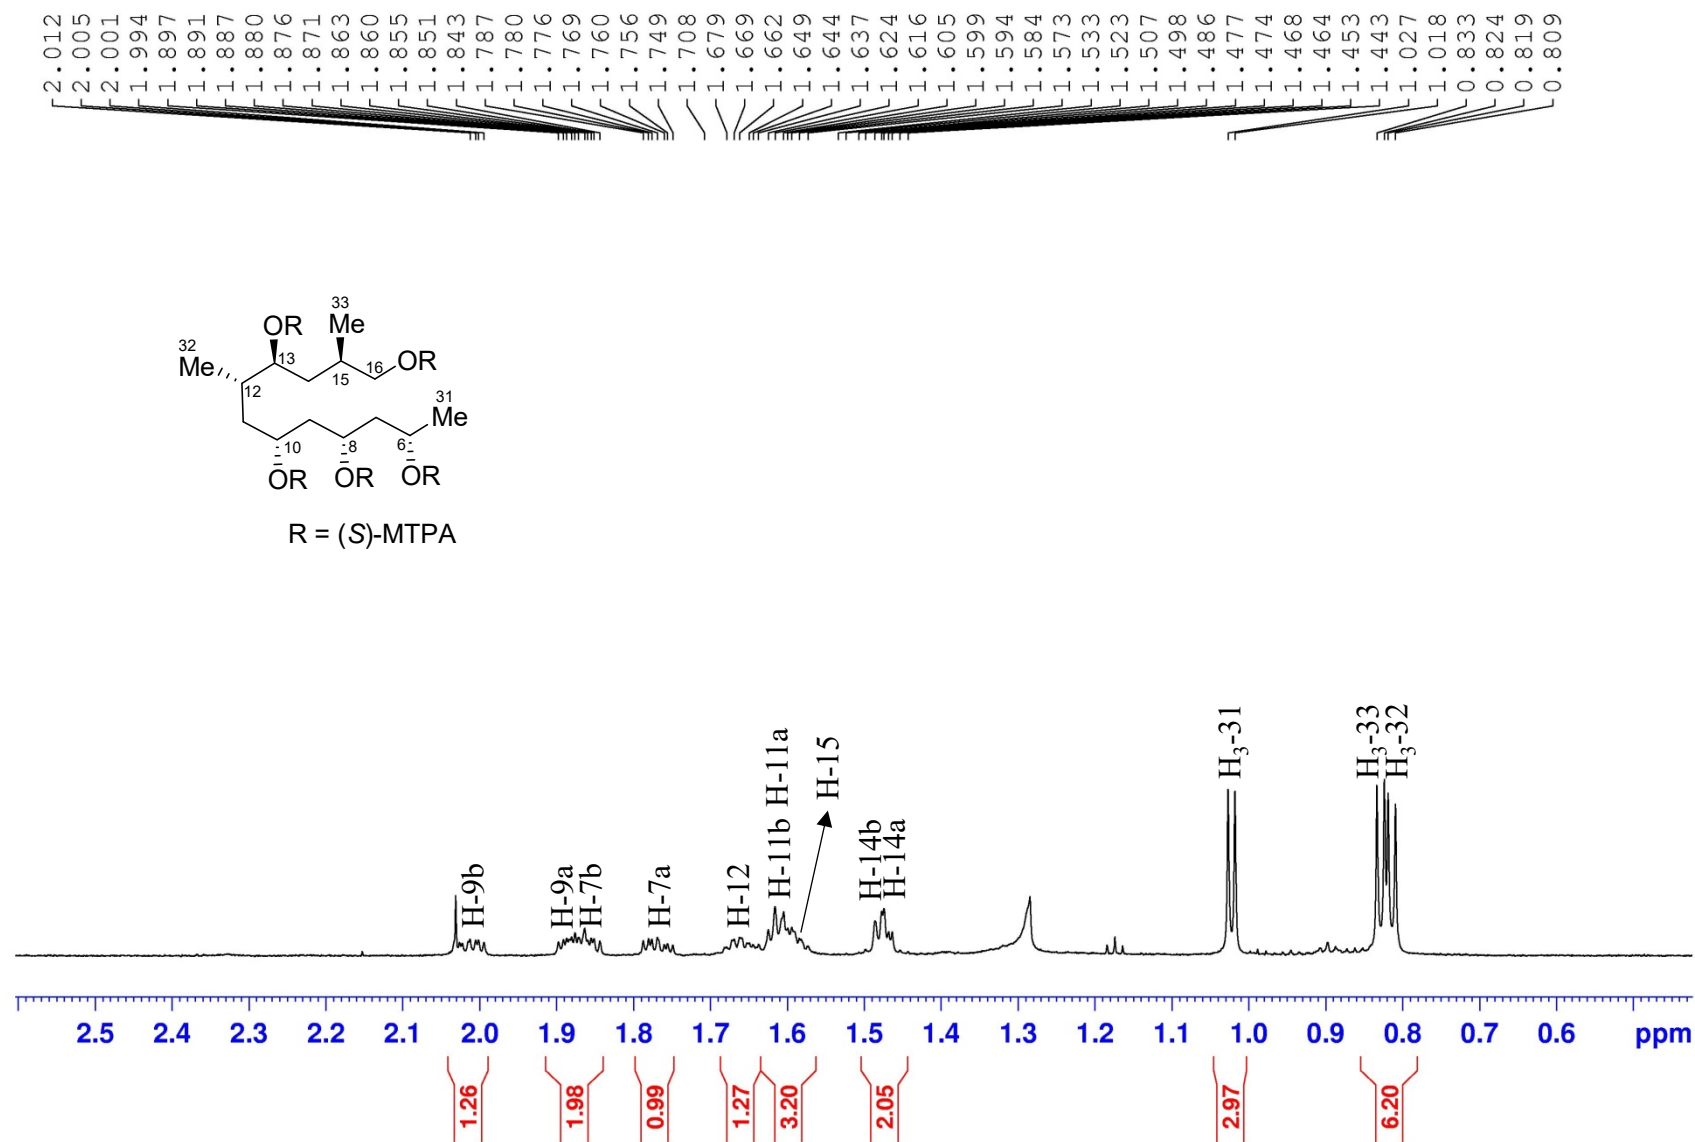

$^1\text{H}$ - $^1\text{H}$  COSY (700 MHz) spectrum of the fragment **1As** in  $\text{CD}_3\text{OD}$

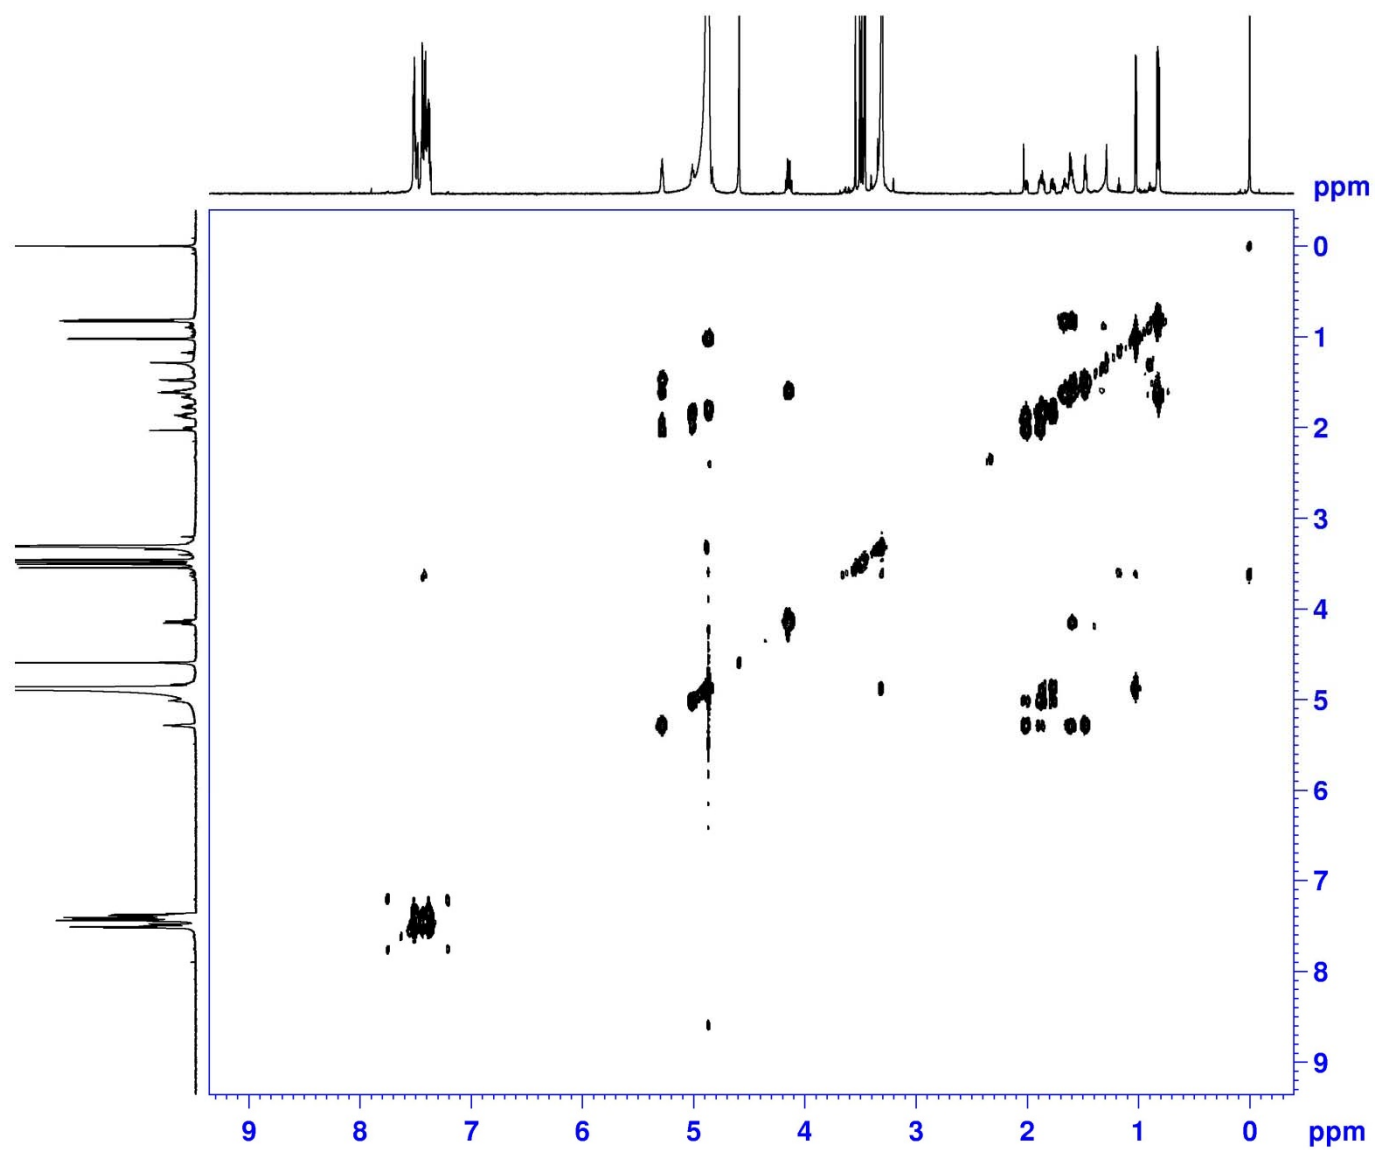

$^1\text{H}$ - $^1\text{H}$  COSY (700 MHz) spectrum of the fragment **1As** in  $\text{CD}_3\text{OD}$

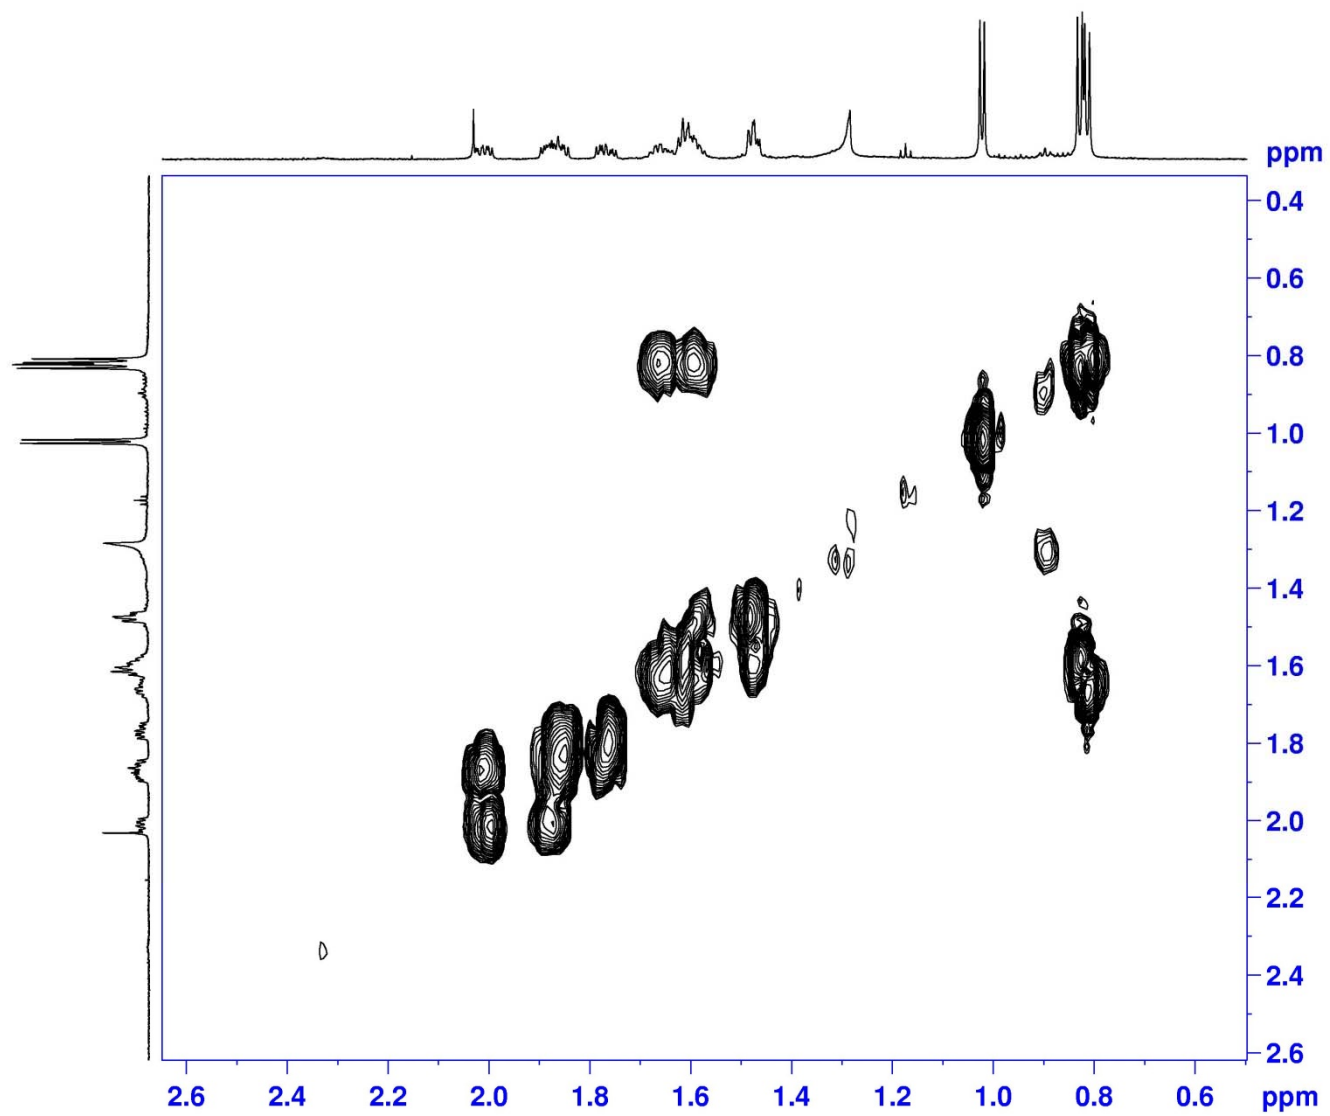

$^1\text{H}$ - $^1\text{H}$  COSY (700 MHz) spectrum of the fragment **1As** in  $\text{CD}_3\text{OD}$

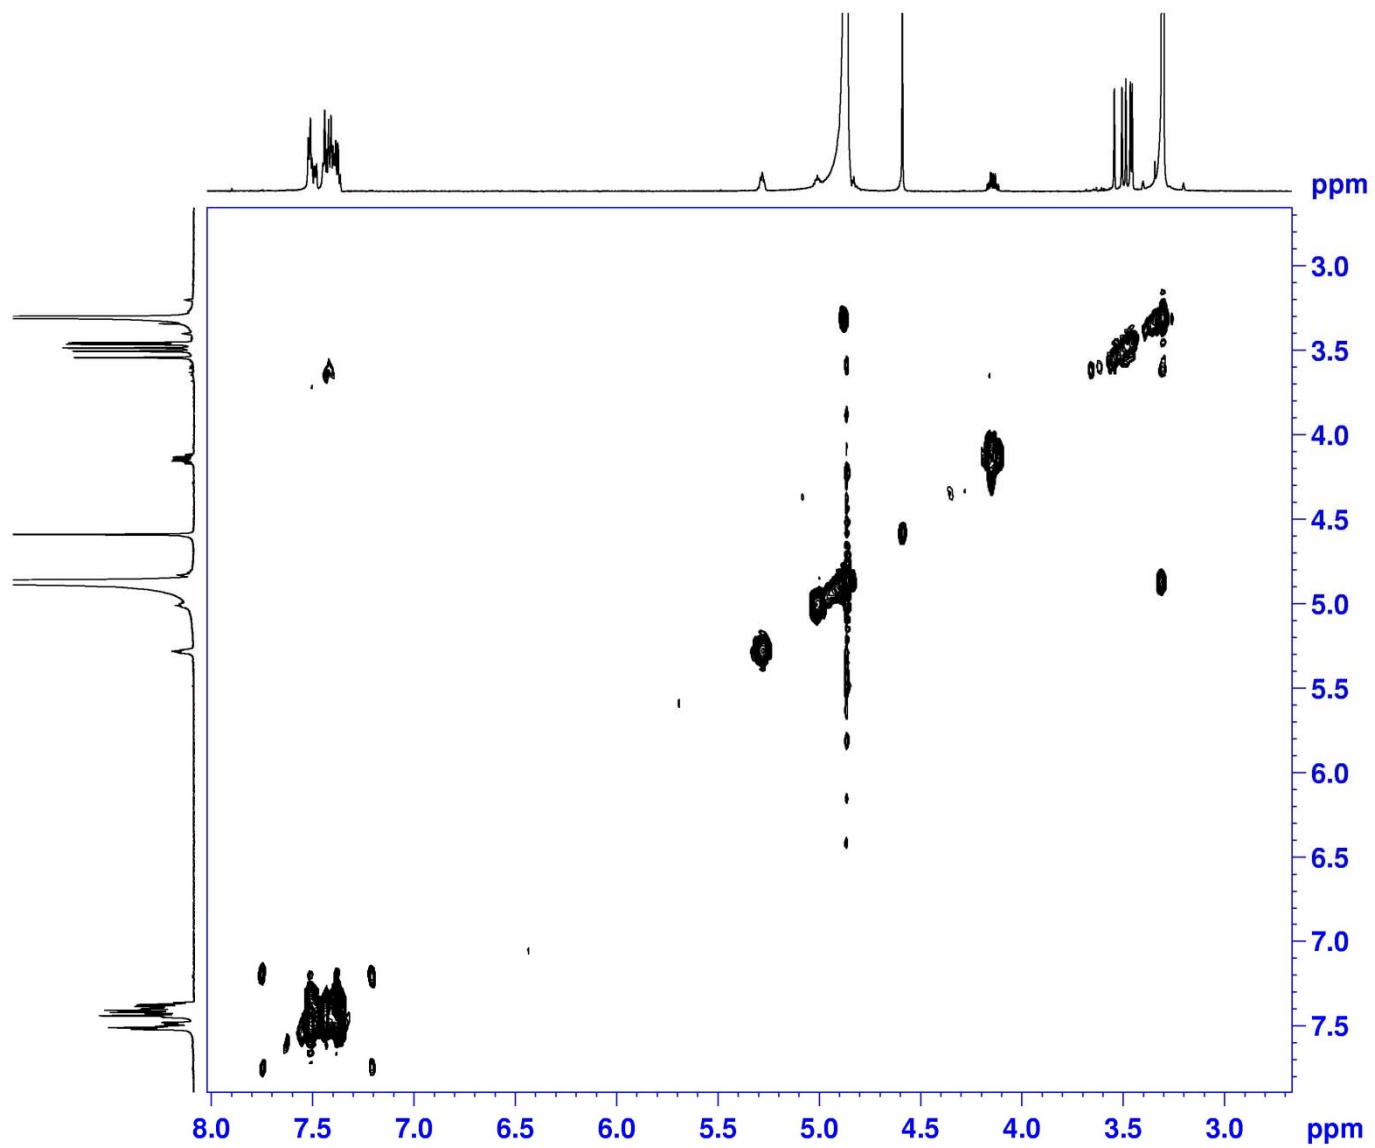

$^1\text{H}$ - $^1\text{H}$  COSY (700 MHz) spectrum of the fragment **1As** in  $\text{CD}_3\text{OD}$

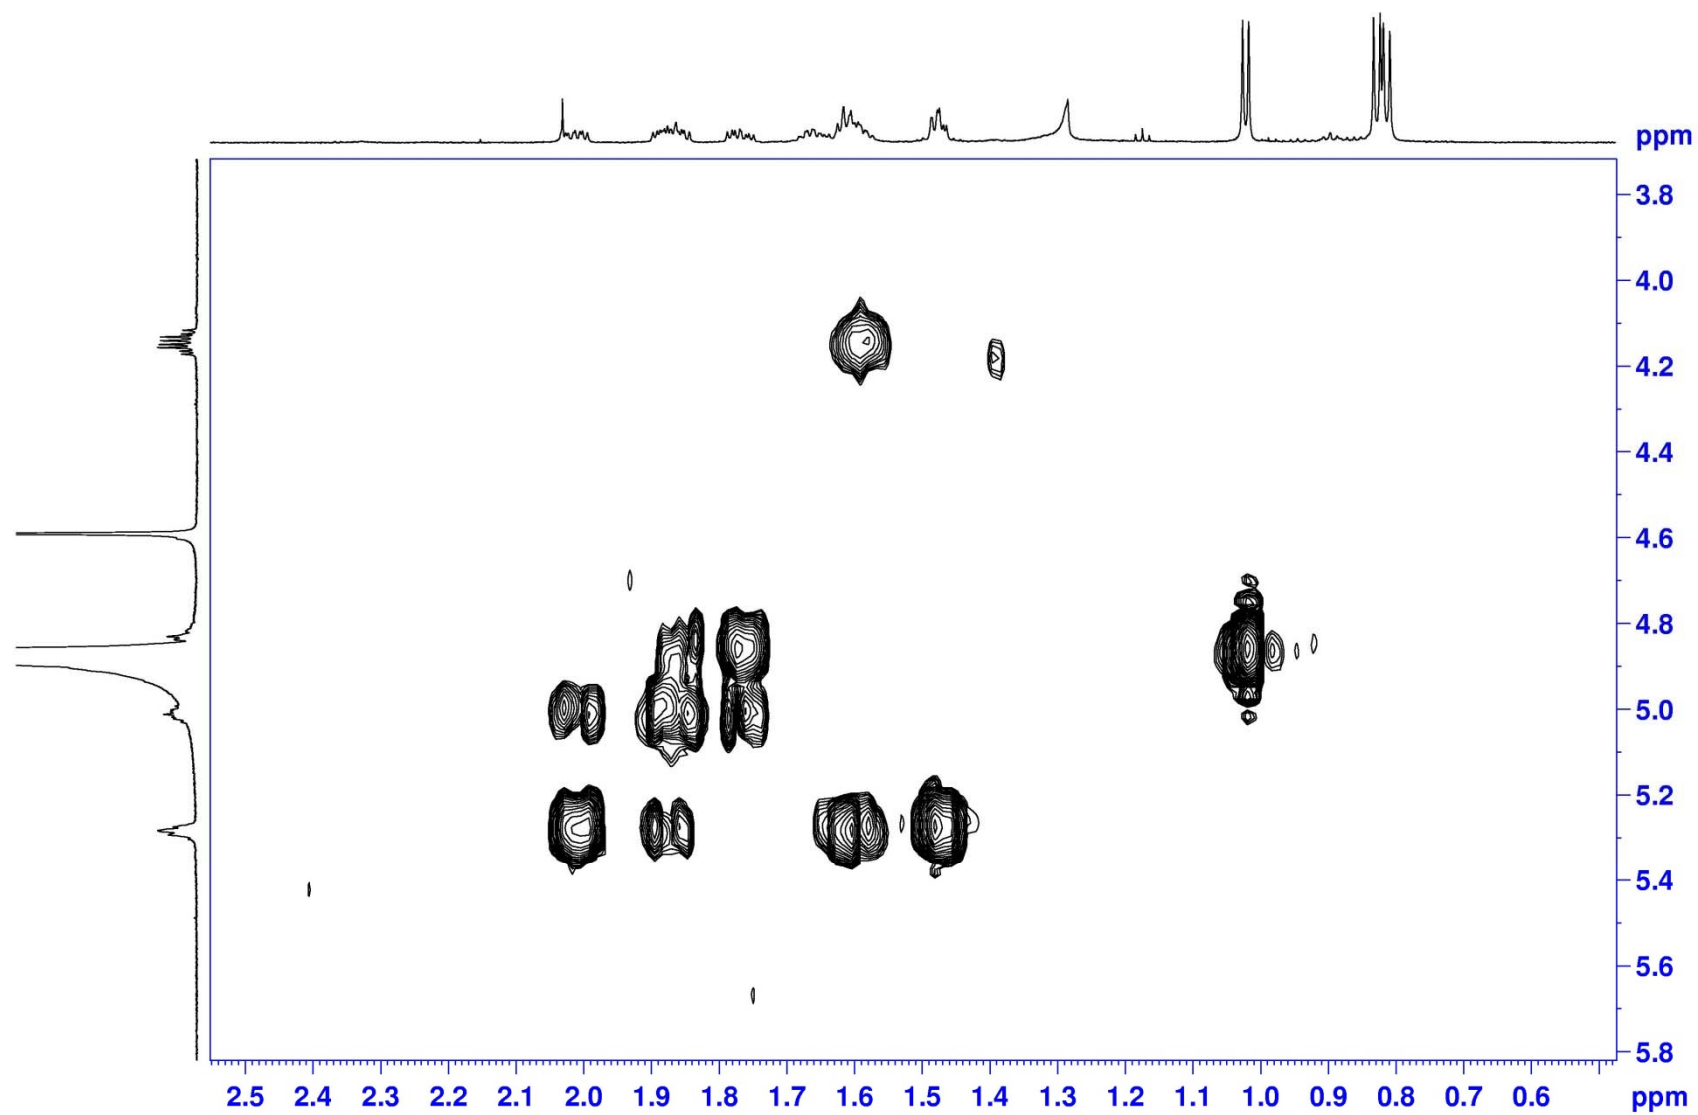



# $^1\text{H}$ (700 MHz) NMR spectrum of the fragment **1Ar** in $\text{CD}_3\text{OD}$

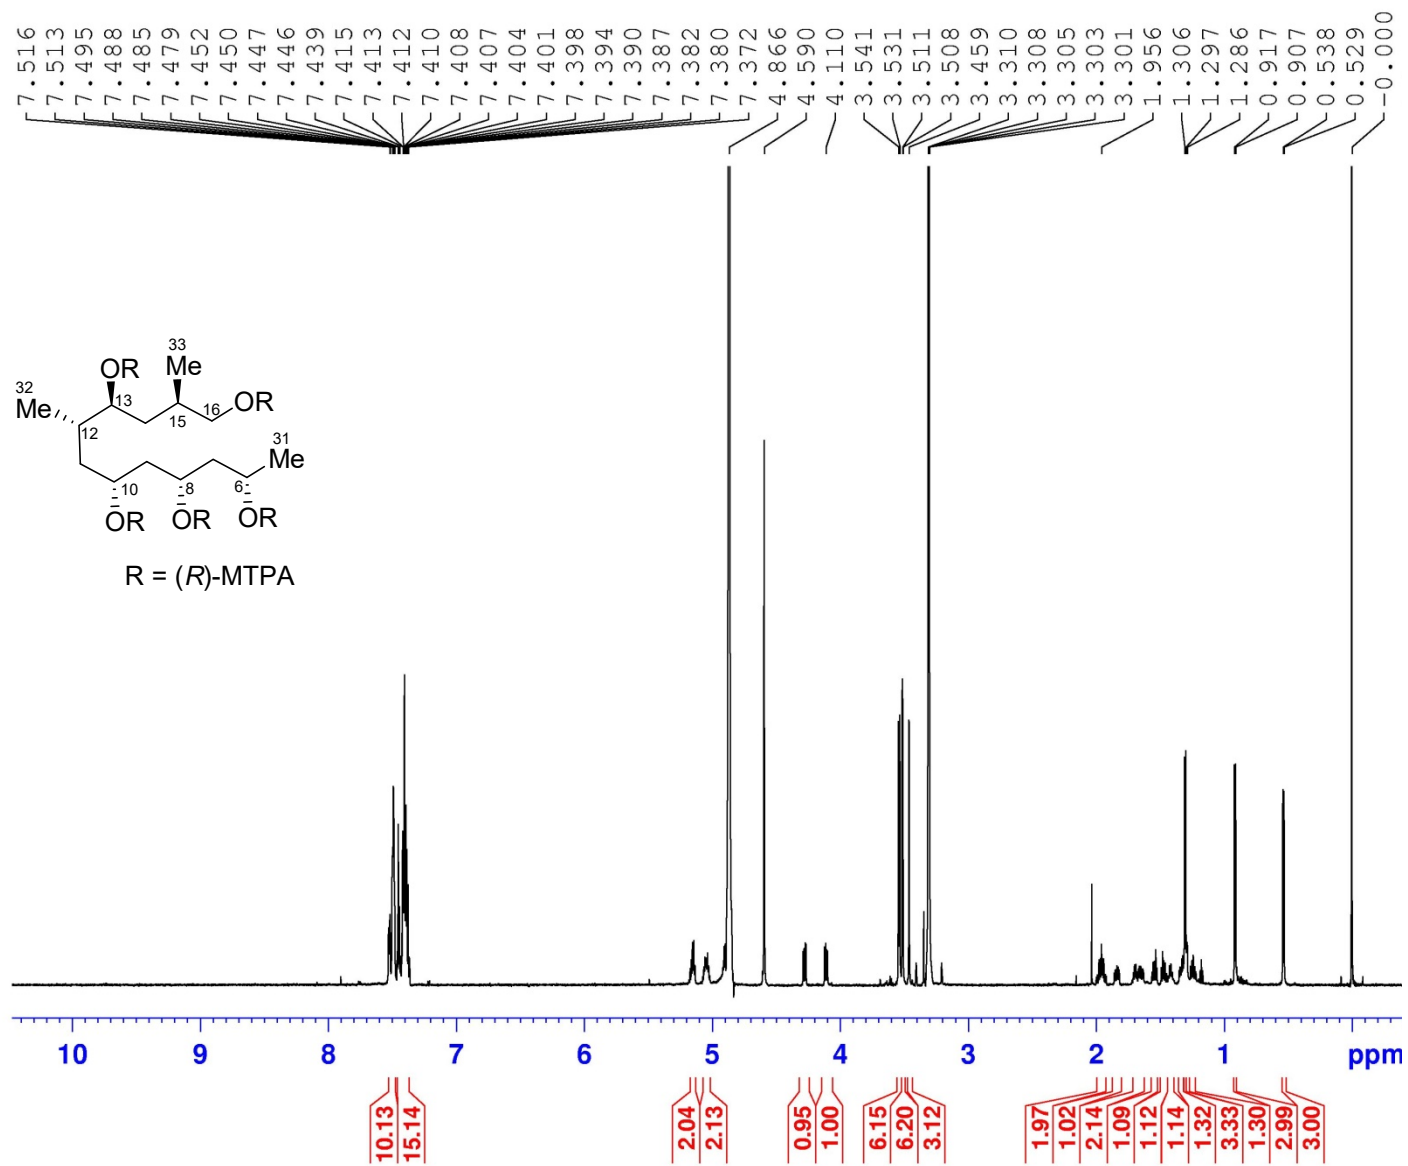



$^1\text{H}$  (700 MHz) NMR spectrum of the fragment **1Ar** in  $\text{CD}_3\text{OD}$

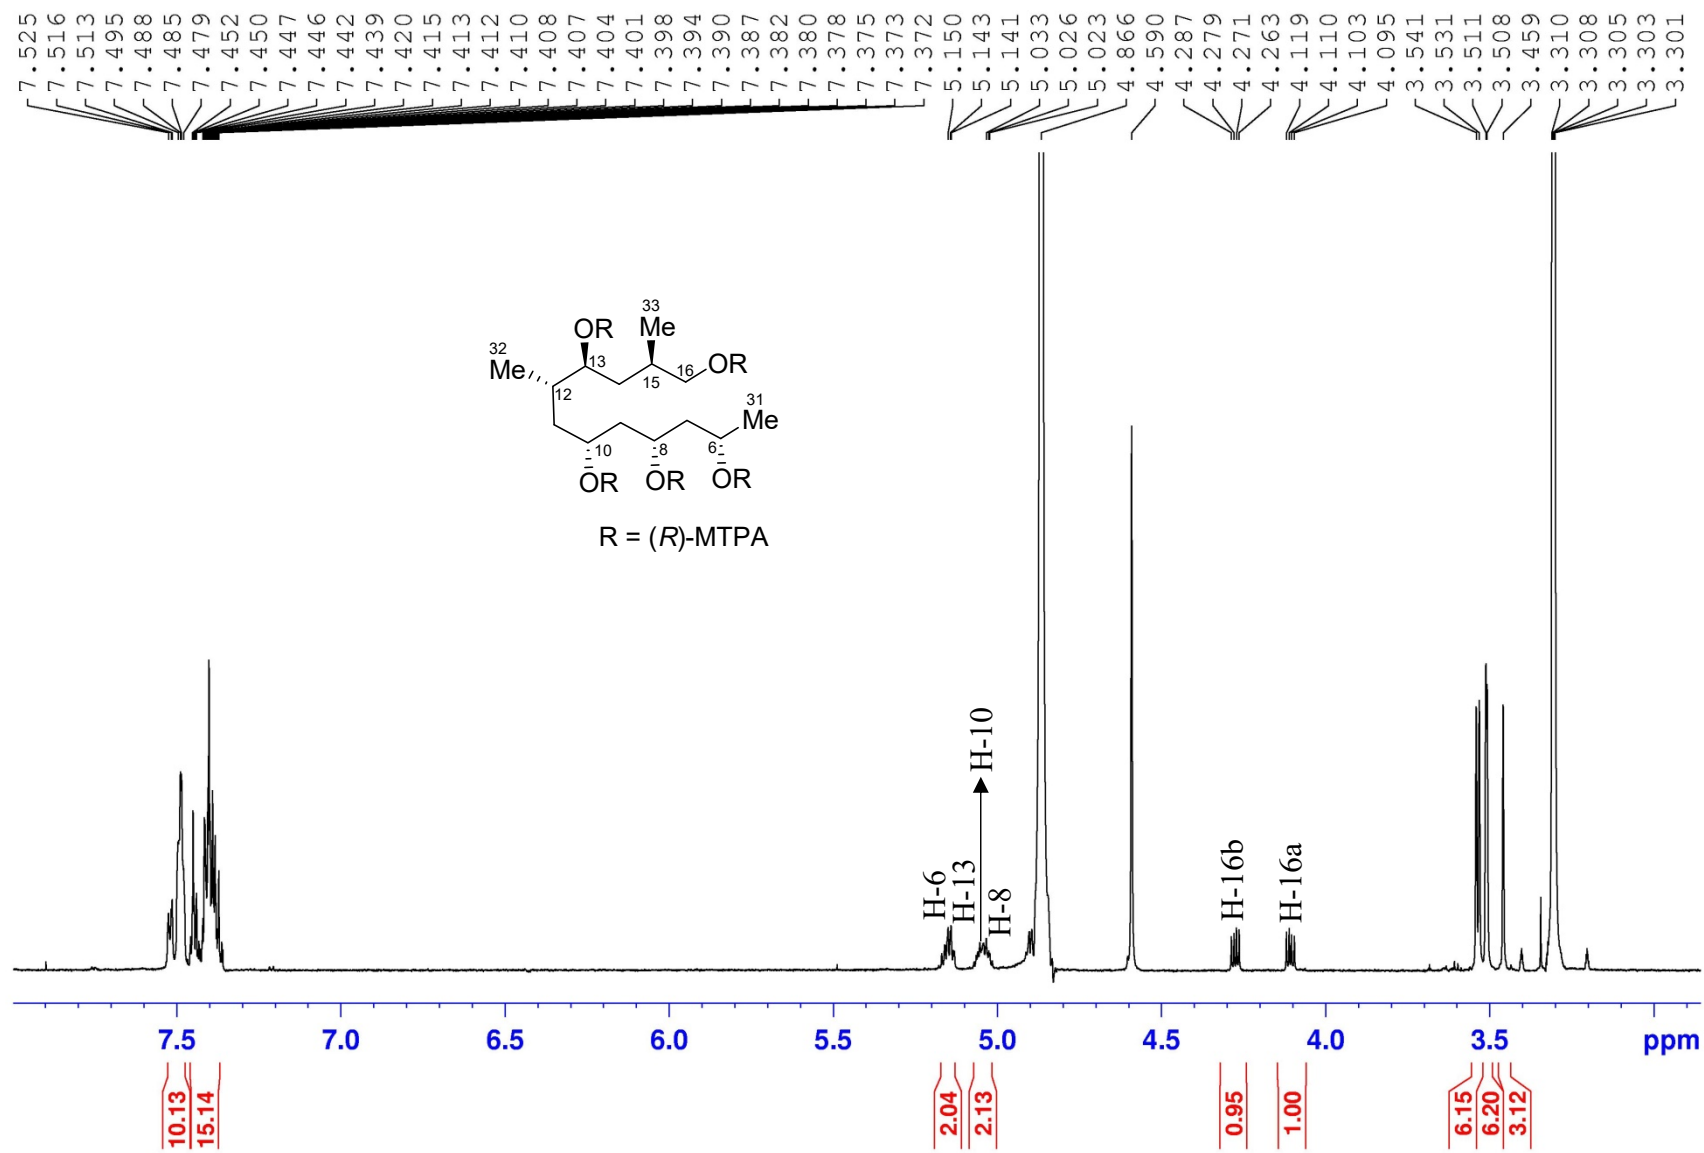

$^1\text{H}$  (700 MHz) NMR spectrum of the fragment **1Ar** in  $\text{CD}_3\text{OD}$

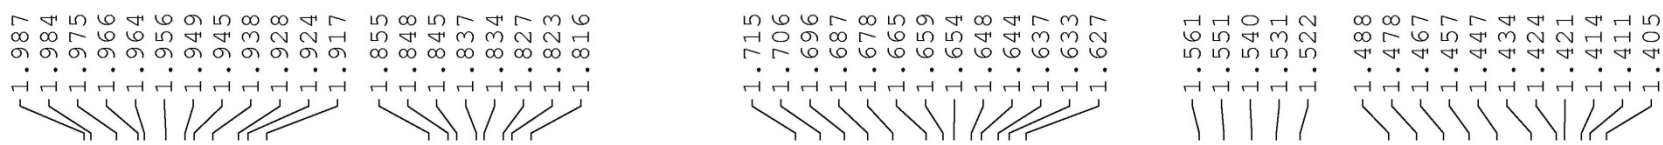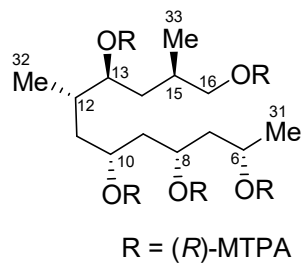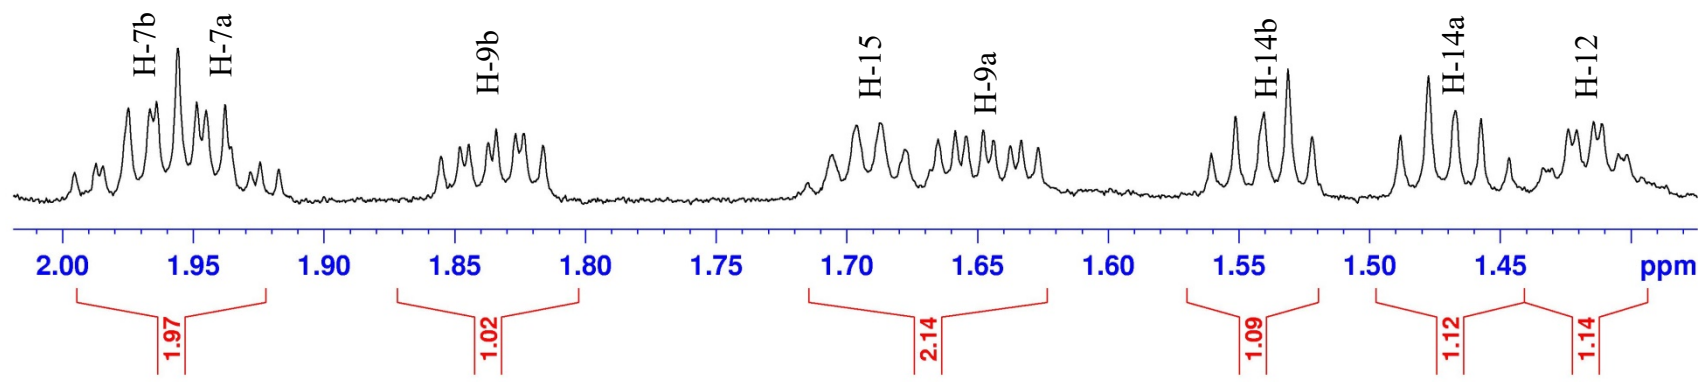

<sup>1</sup>H (700 MHz) NMR spectrum of the fragment **1Ar** in CD<sub>3</sub>OD

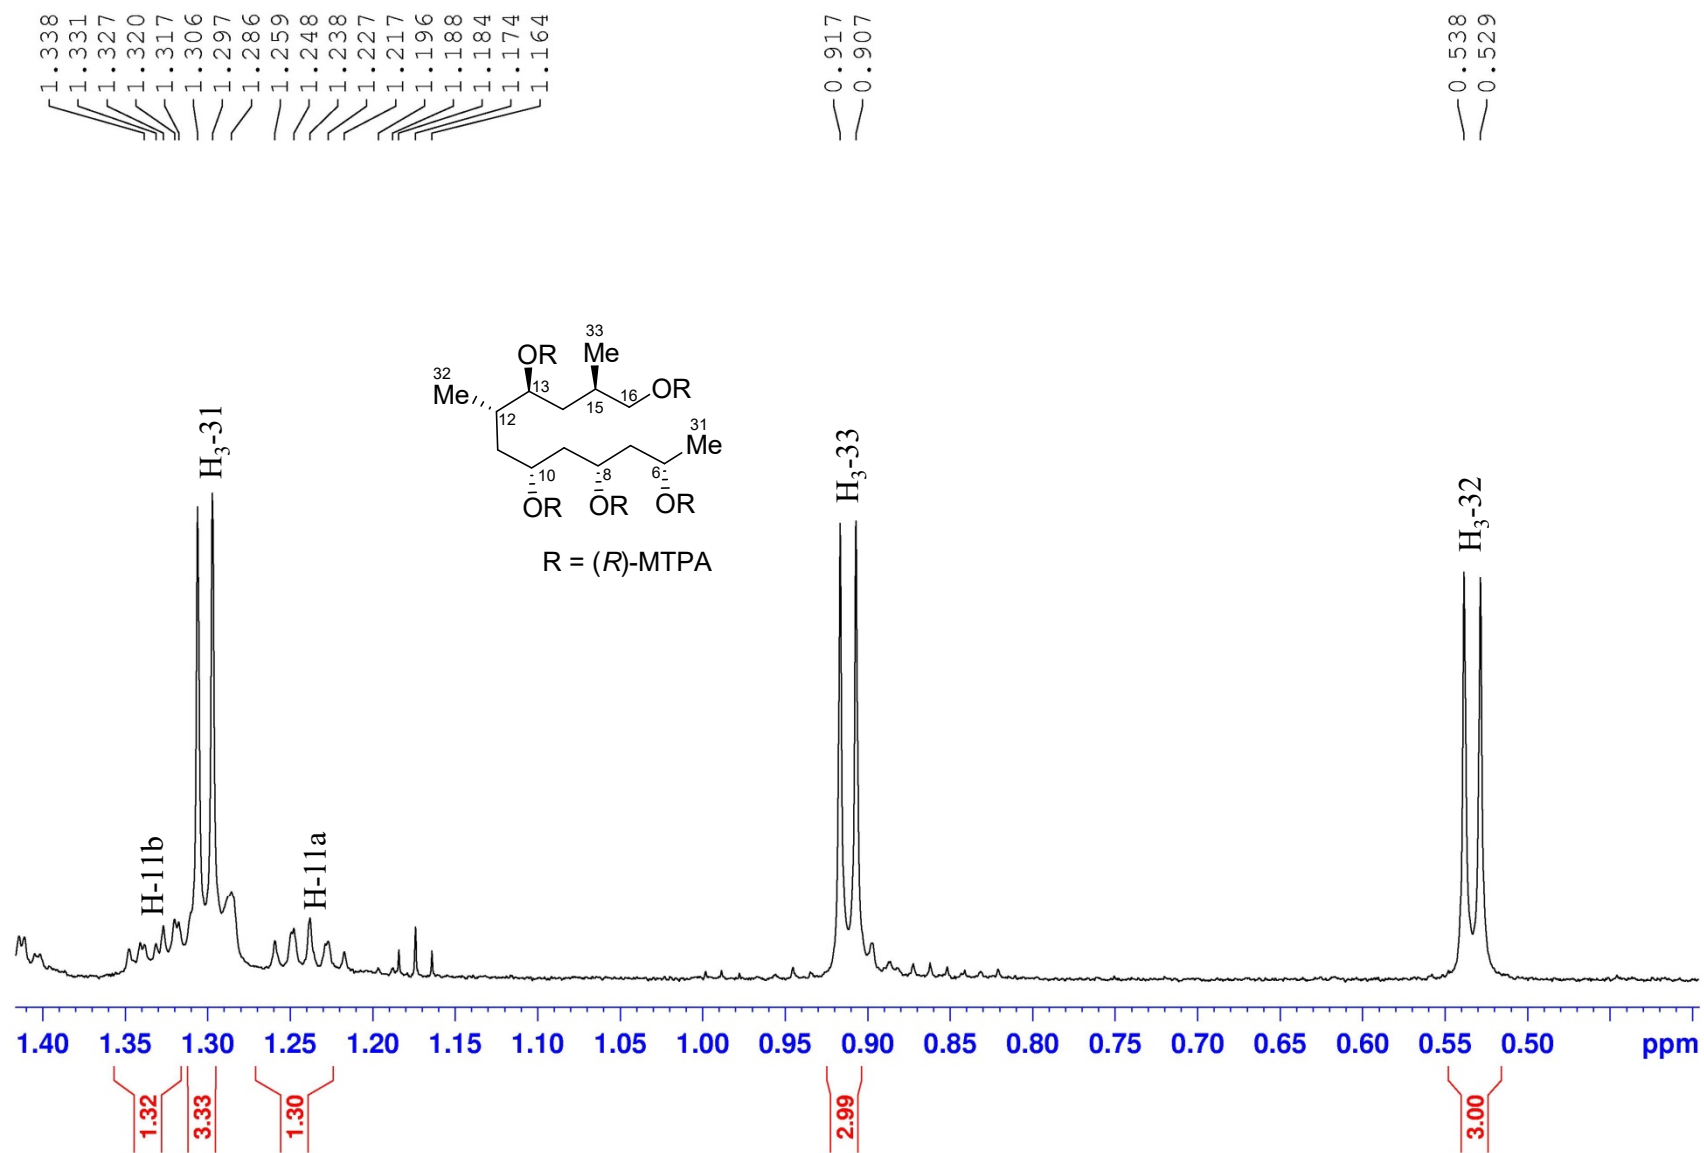

$^1\text{H}$ - $^1\text{H}$  COSY (700 MHz) spectrum of the fragment **1Ar** in  $\text{CD}_3\text{OD}$

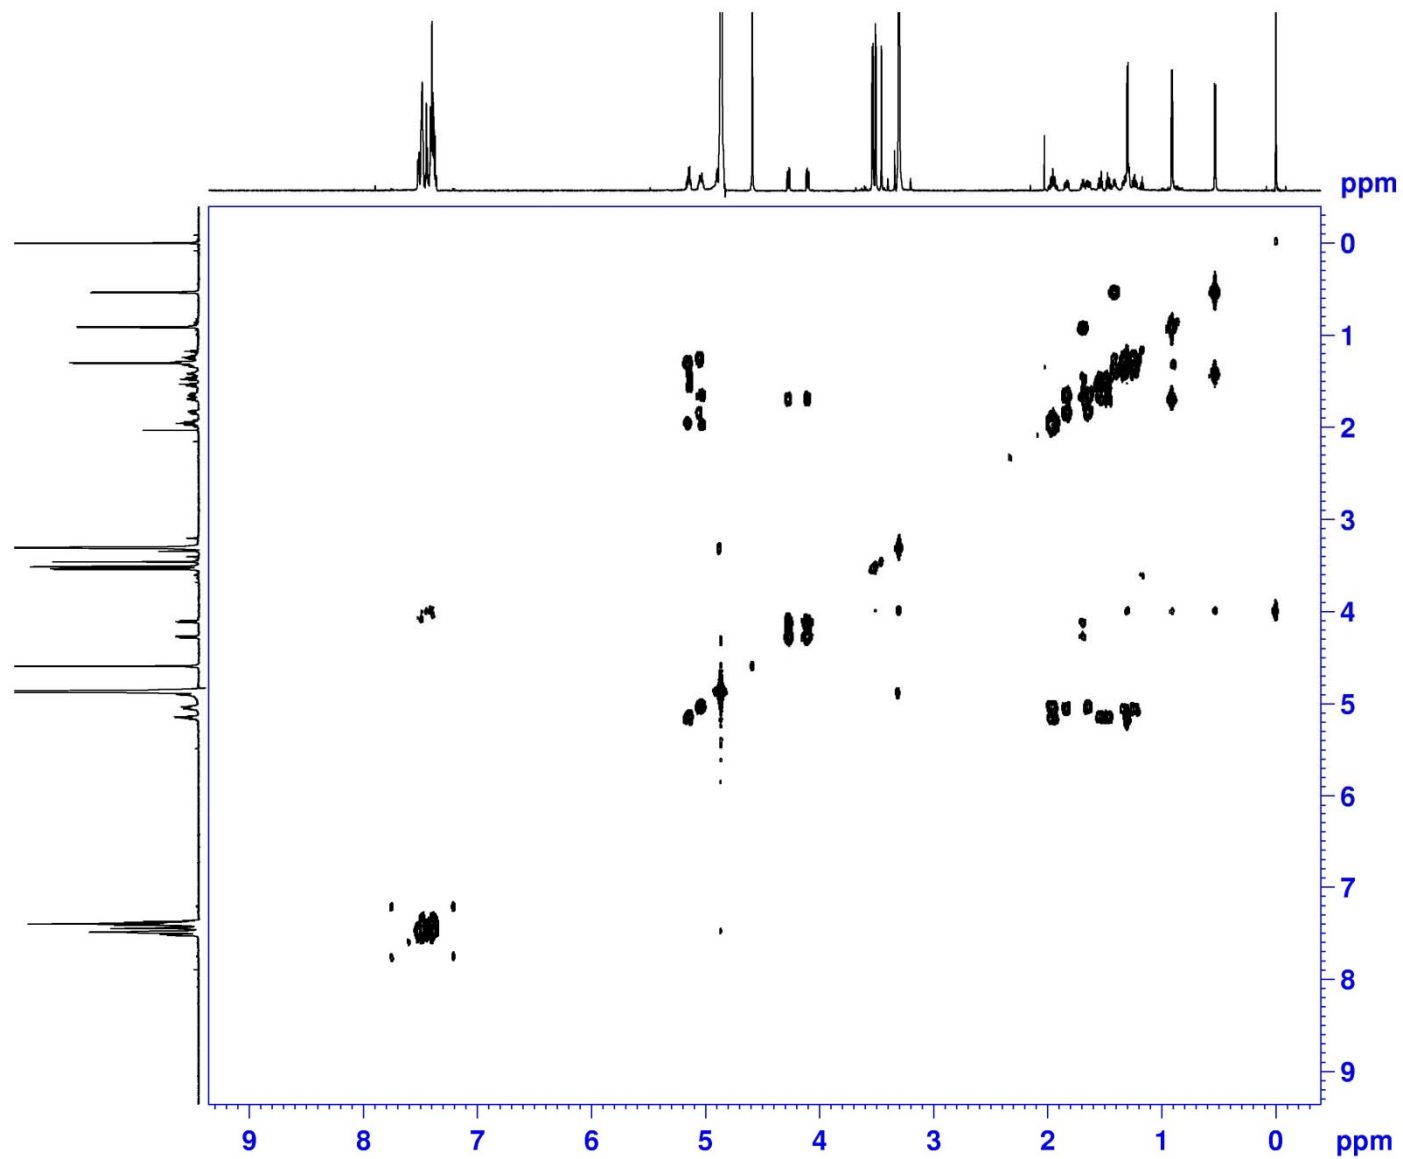

$^1\text{H}$ - $^1\text{H}$  COSY (700 MHz) spectrum of the fragment **1Ar** in  $\text{CD}_3\text{OD}$

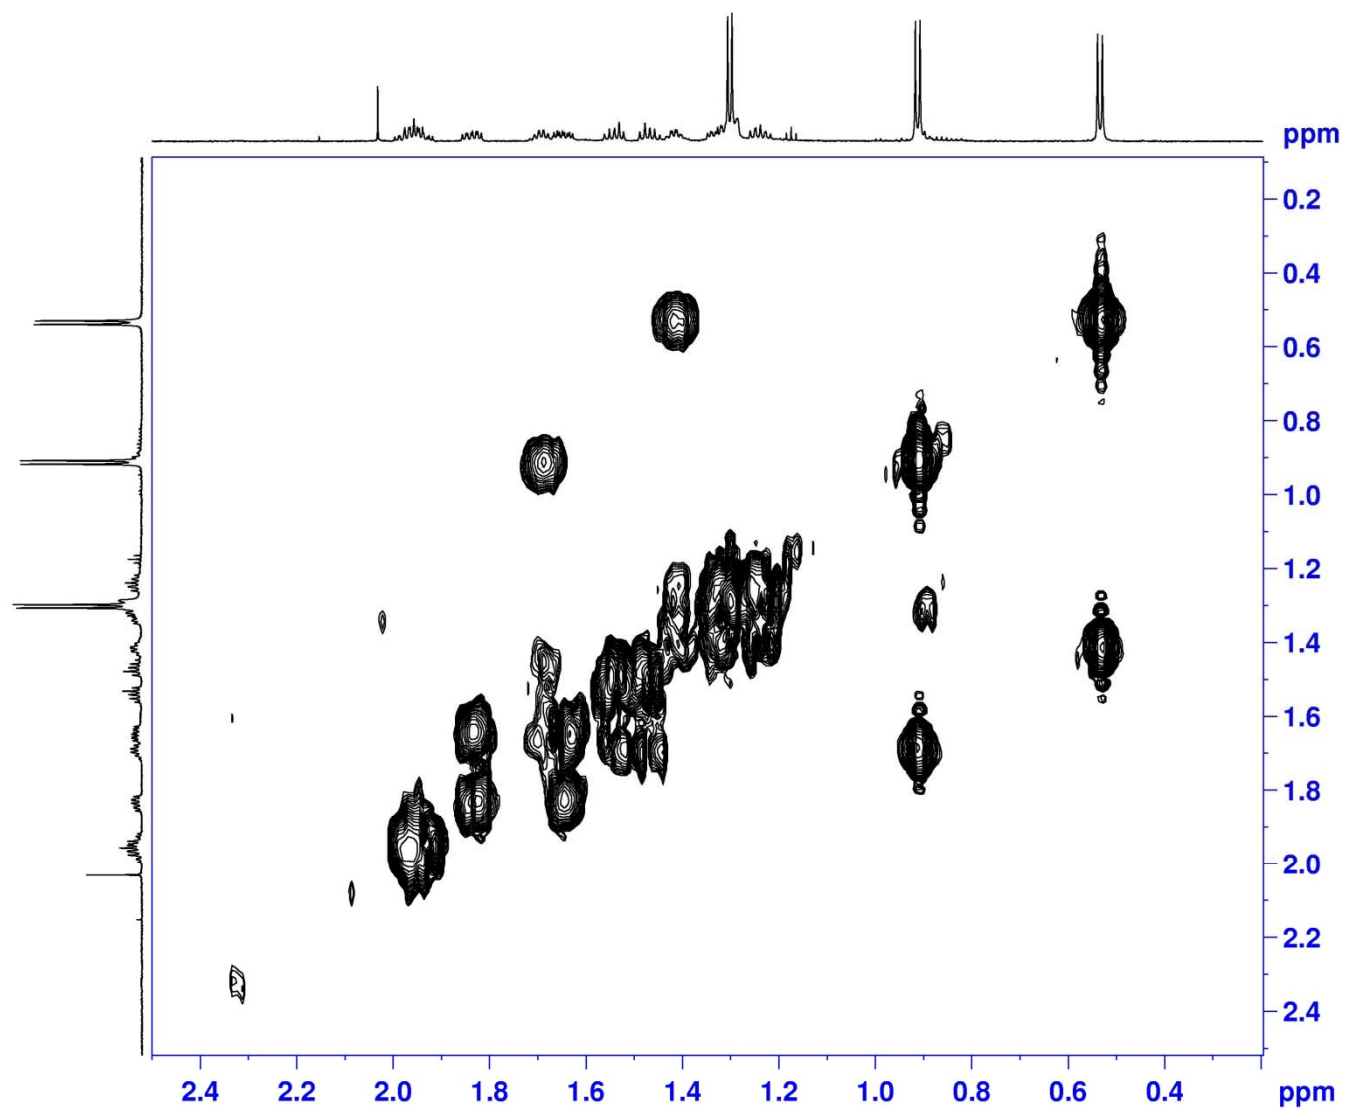

$^1\text{H}$ - $^1\text{H}$  COSY (700 MHz) spectrum of the fragment **1Ar** in  $\text{CD}_3\text{OD}$

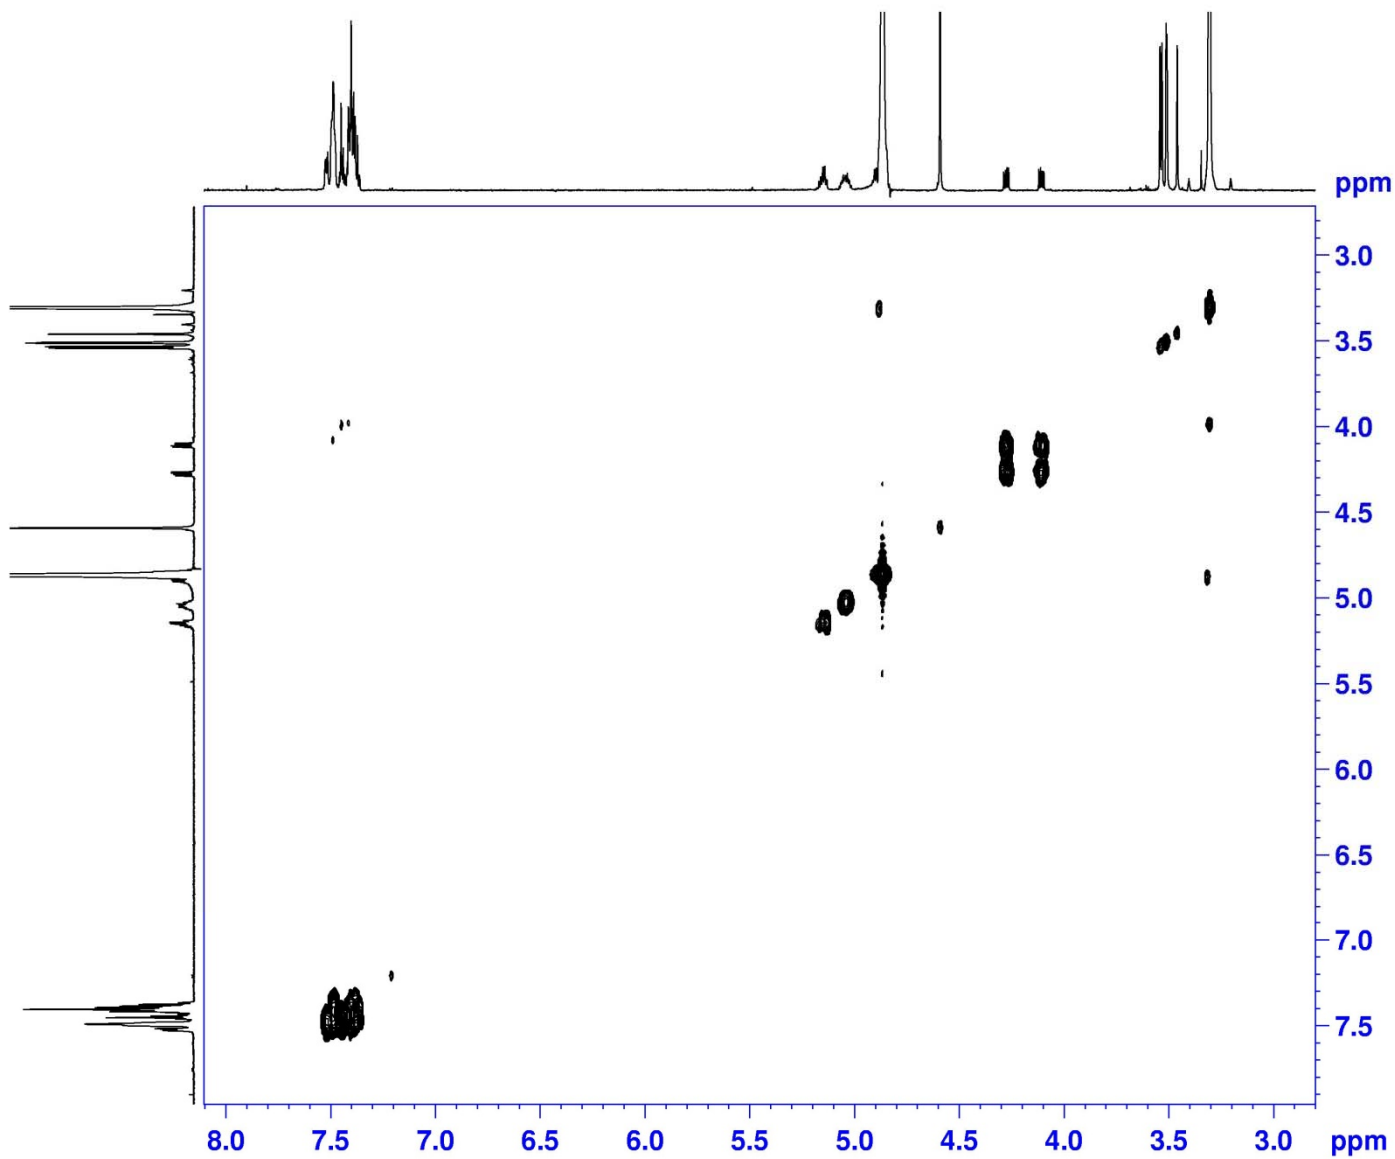

$^1\text{H}$ - $^1\text{H}$  COSY (700 MHz) spectrum of the fragment **1Ar** in  $\text{CD}_3\text{OD}$

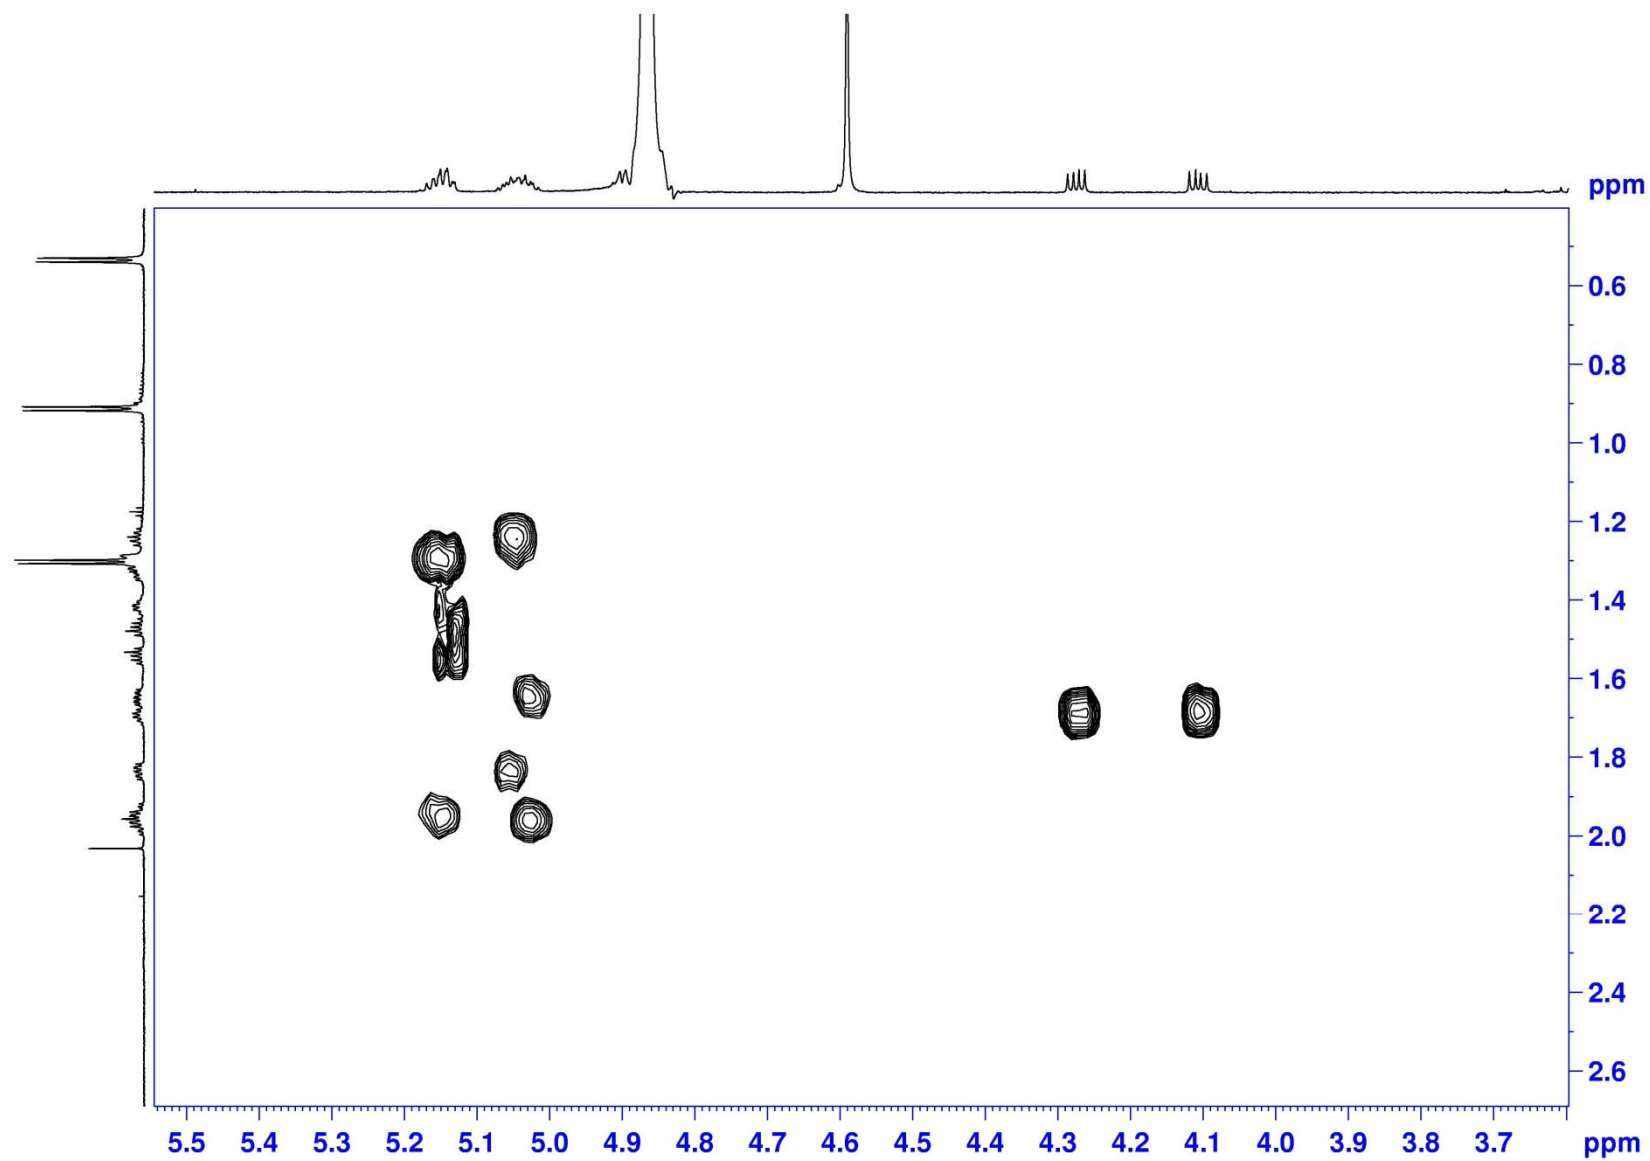

# LR-ESIMS for the fragment 1A's

## Generic Display Report

### Analysis Info

|               |                                                                            |                  |                     |
|---------------|----------------------------------------------------------------------------|------------------|---------------------|
| Analysis Name | D:\Data\amaZon SLIMS\data\202011\jiangzhongping_37-1-O3-2-S-2_99_01_2316.d | Acquisition Date | 2020-11-09 16:00:02 |
| Method        | 2316.m                                                                     | Operator         | bruker              |
| Sample Name   | jiangzhongping_37-1-O3-2-S-2                                               | Instrument       | amaZon SL           |
| Comment       |                                                                            |                  |                     |

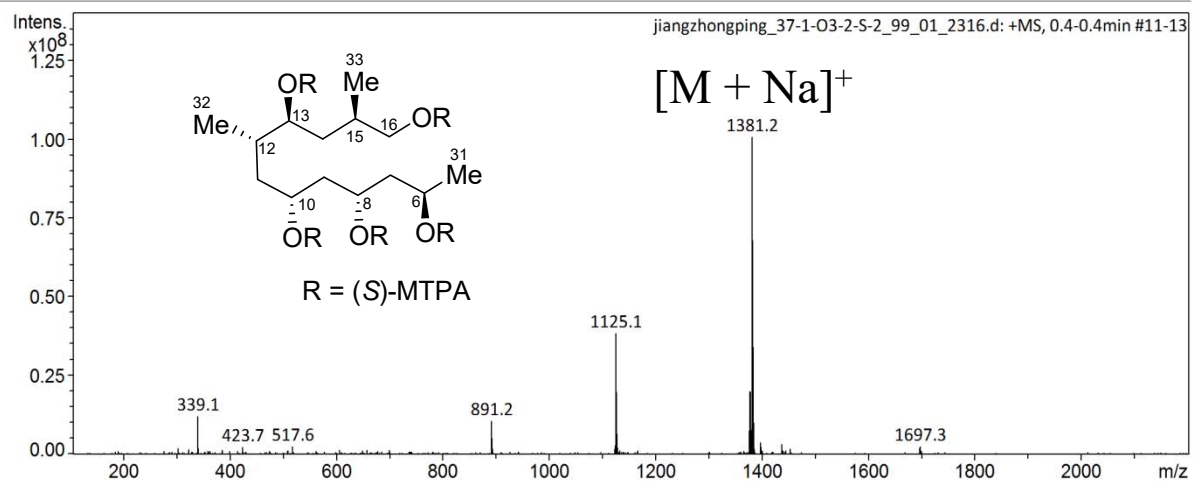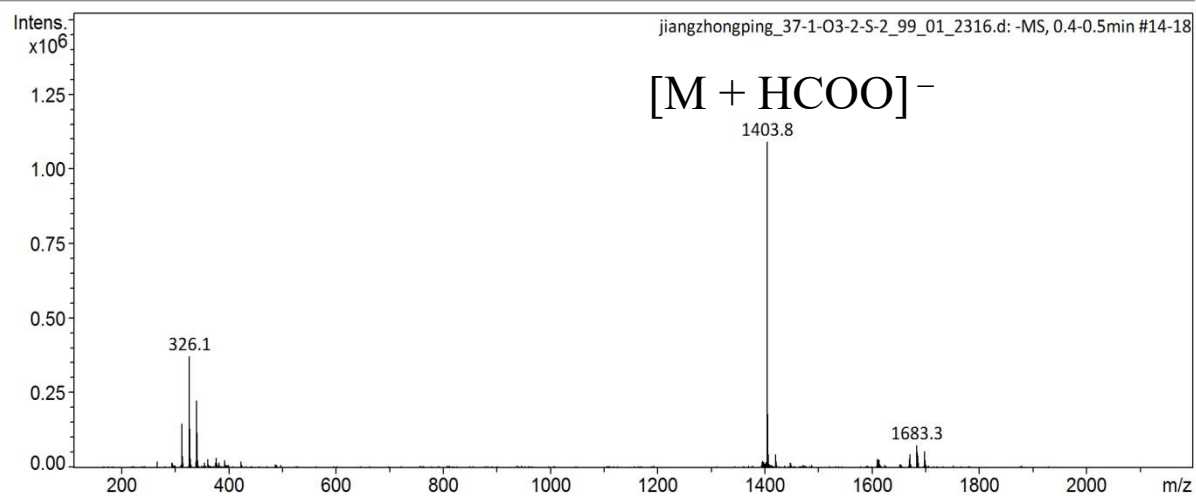



# $^1\text{H}$ (700 MHz) NMR spectrum of the fragment **1A's** in $\text{CD}_3\text{OD}$

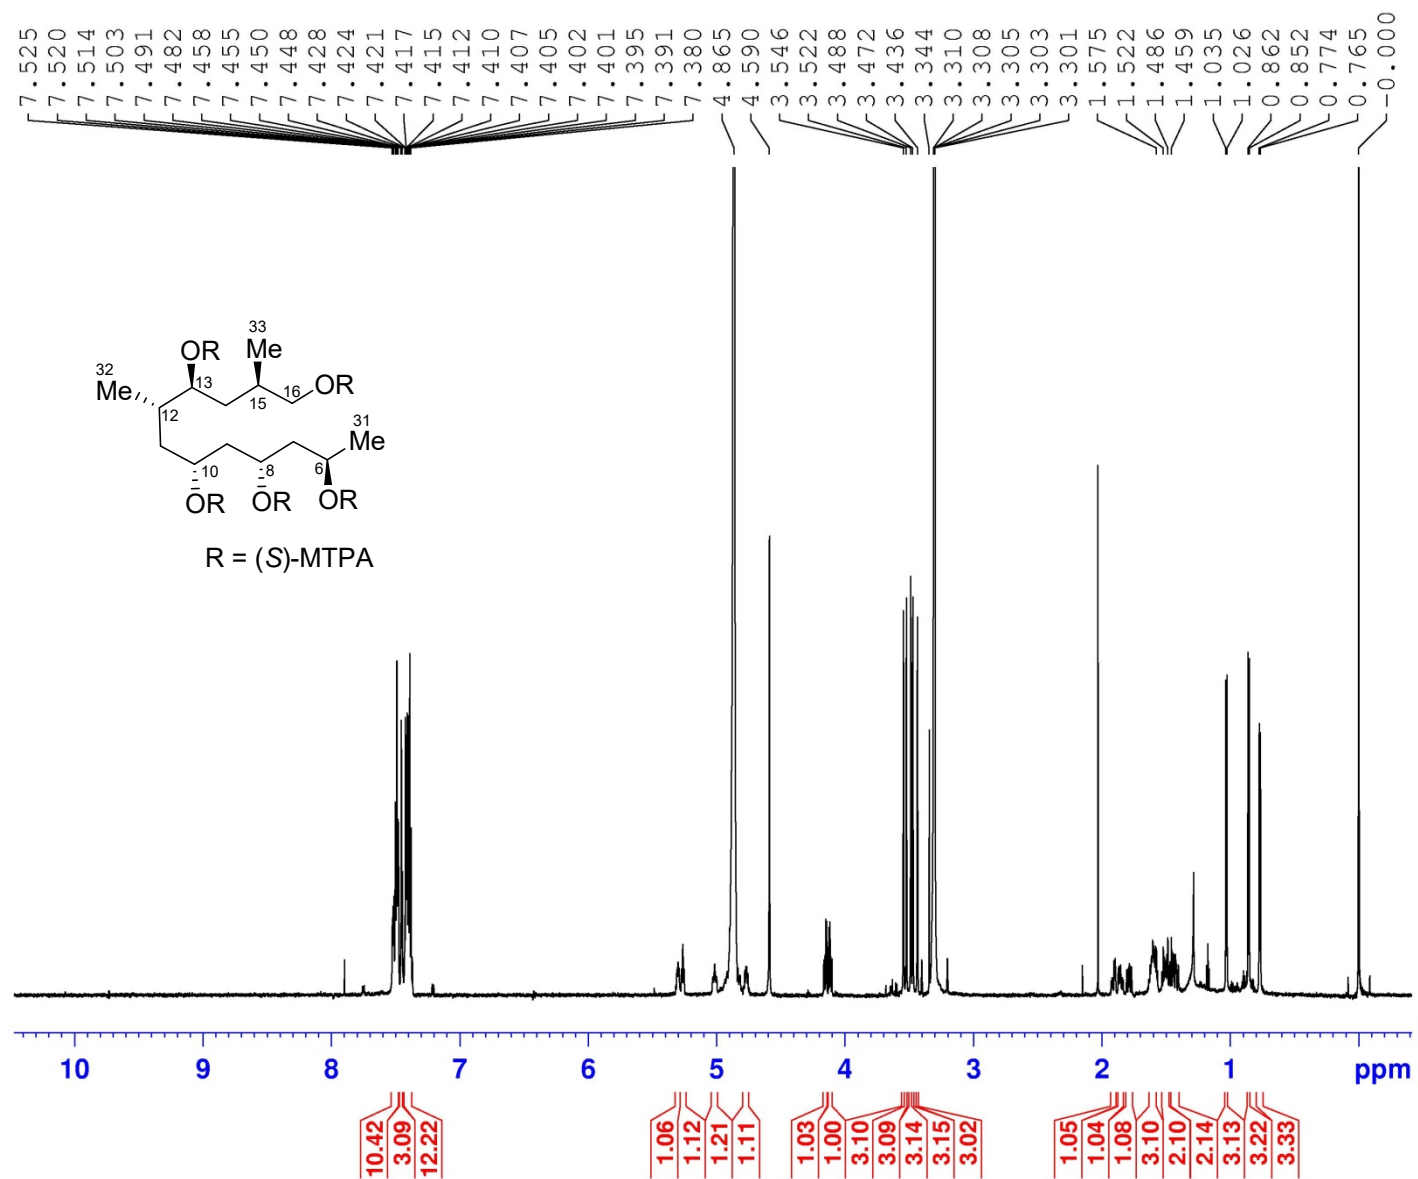

<sup>1</sup>H (700 MHz) NMR spectrum of the fragment 1A's in CD<sub>3</sub>OD

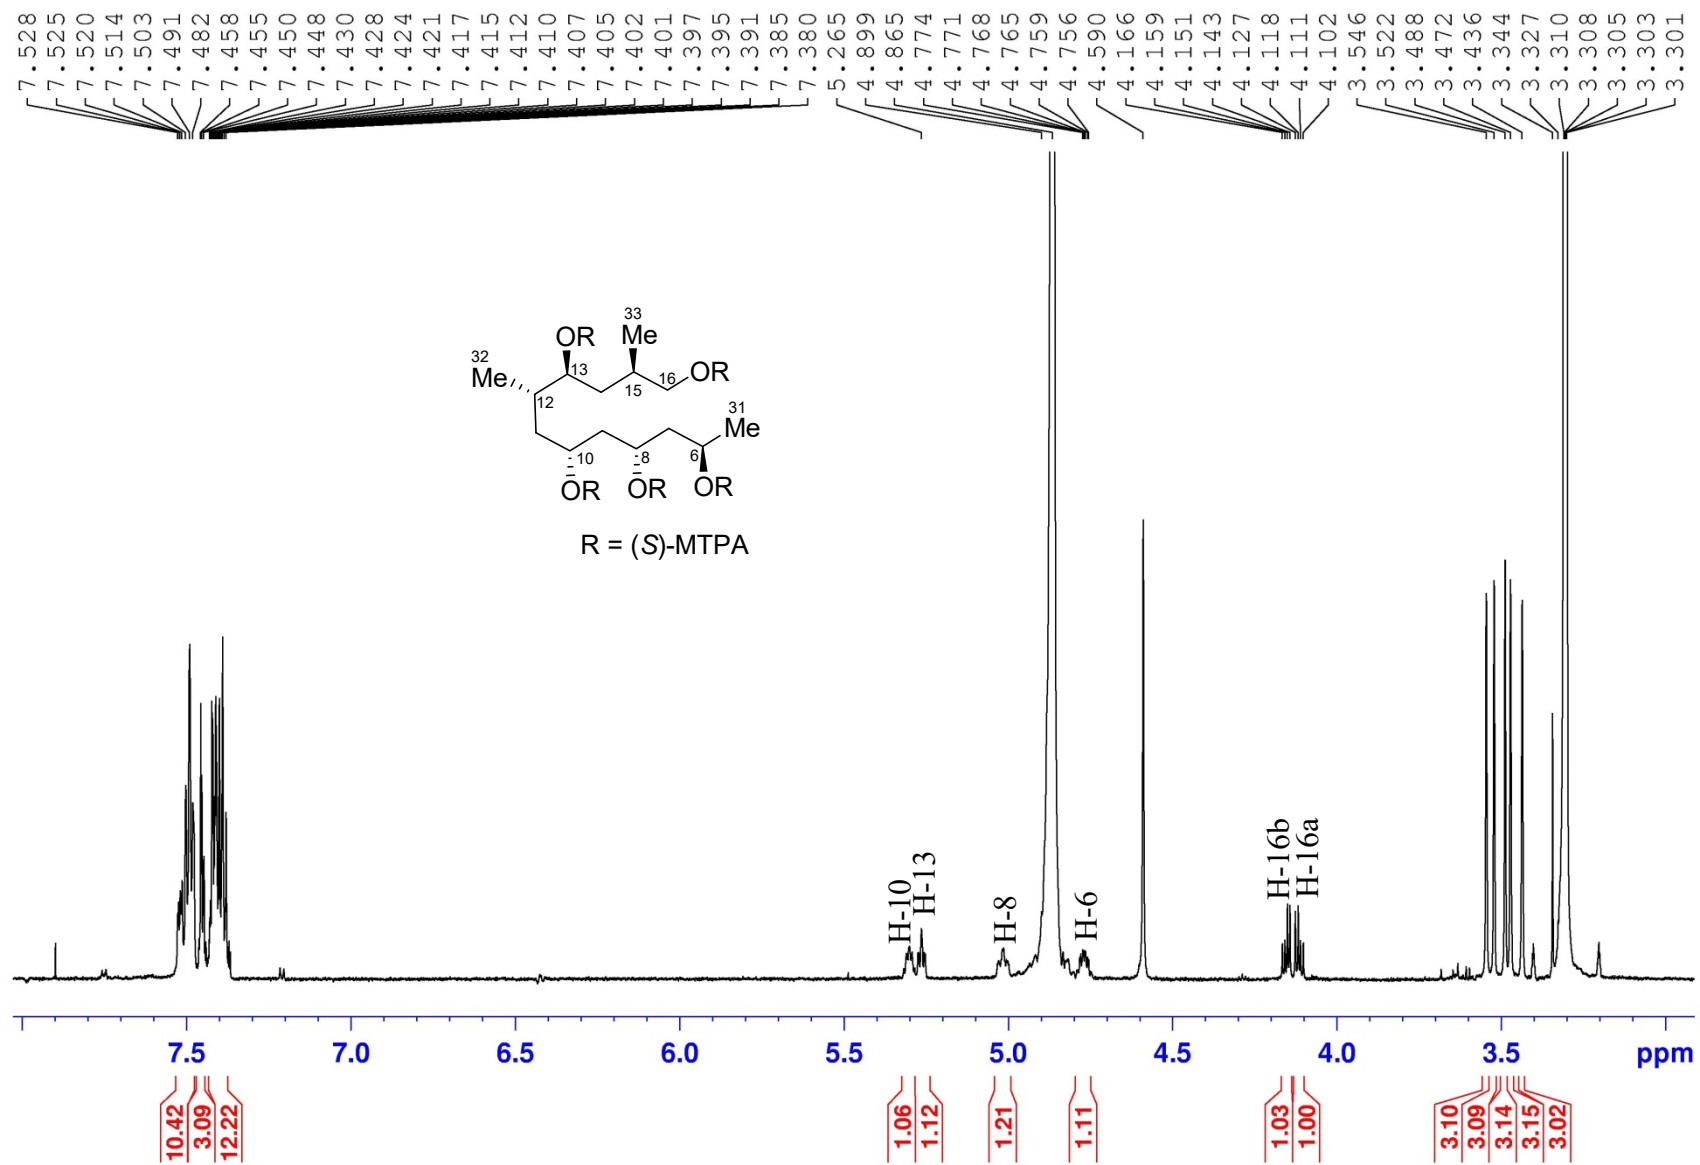



$^1\text{H}$ - $^1\text{H}$  COSY (700 MHz) spectrum of the fragment **1A**'s in  $\text{CD}_3\text{OD}$

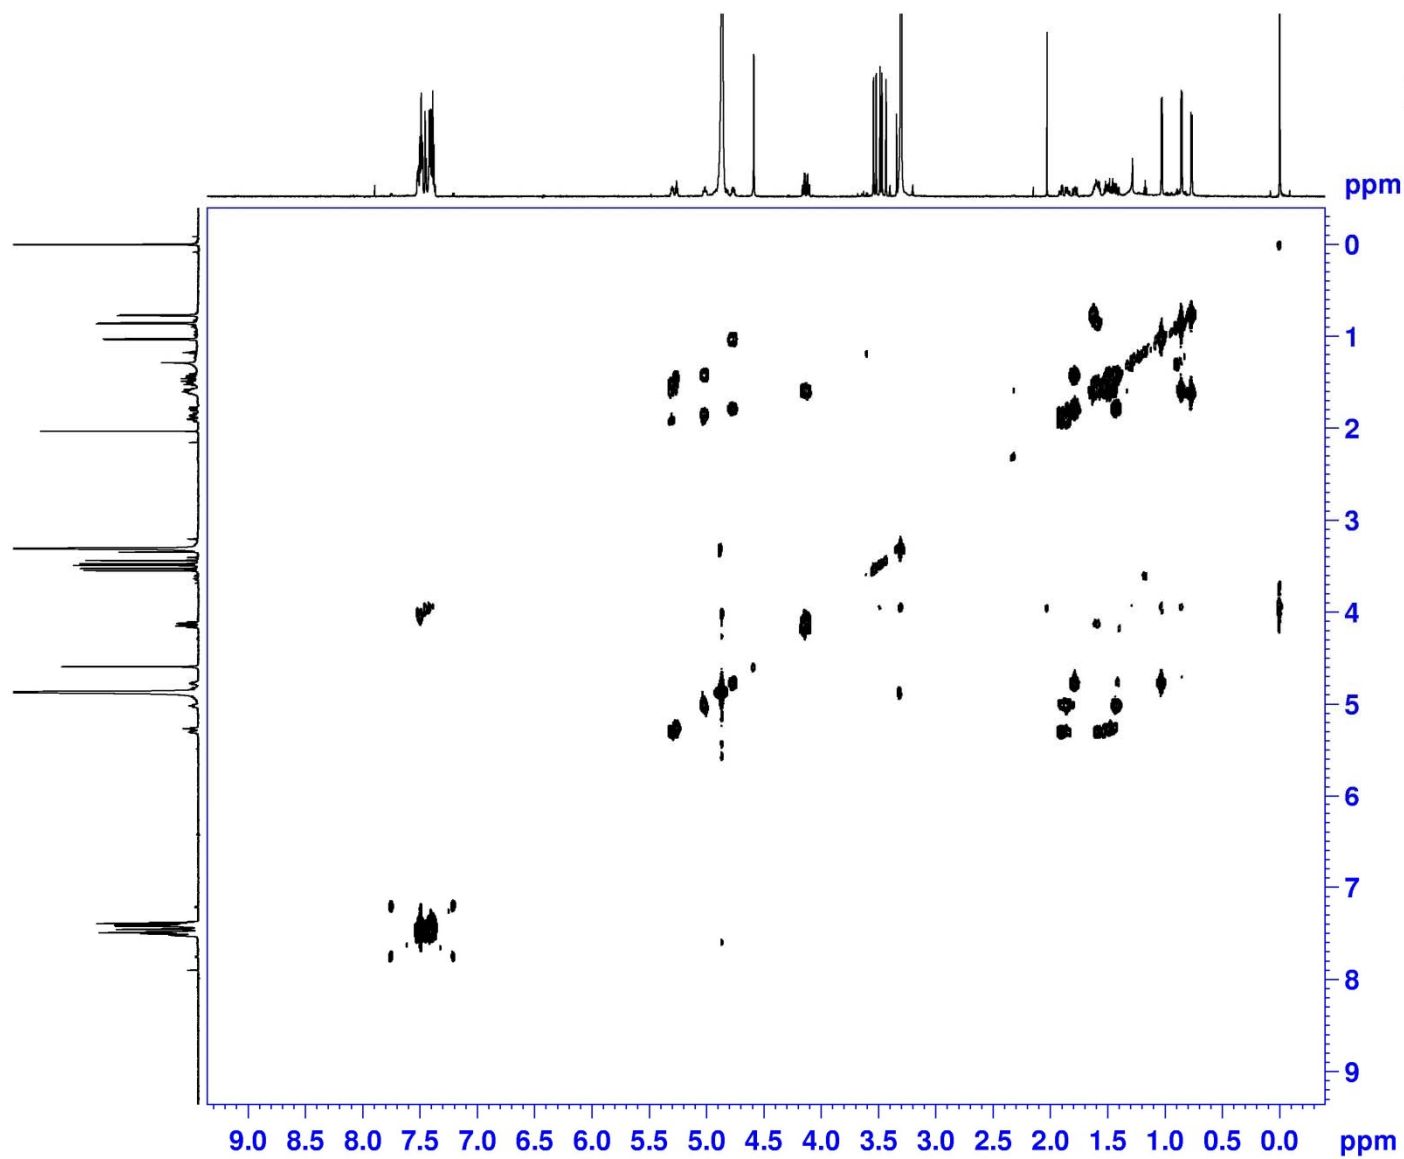

$^1\text{H}$ - $^1\text{H}$  COSY (700 MHz) spectrum of the fragment 1A's in  $\text{CD}_3\text{OD}$

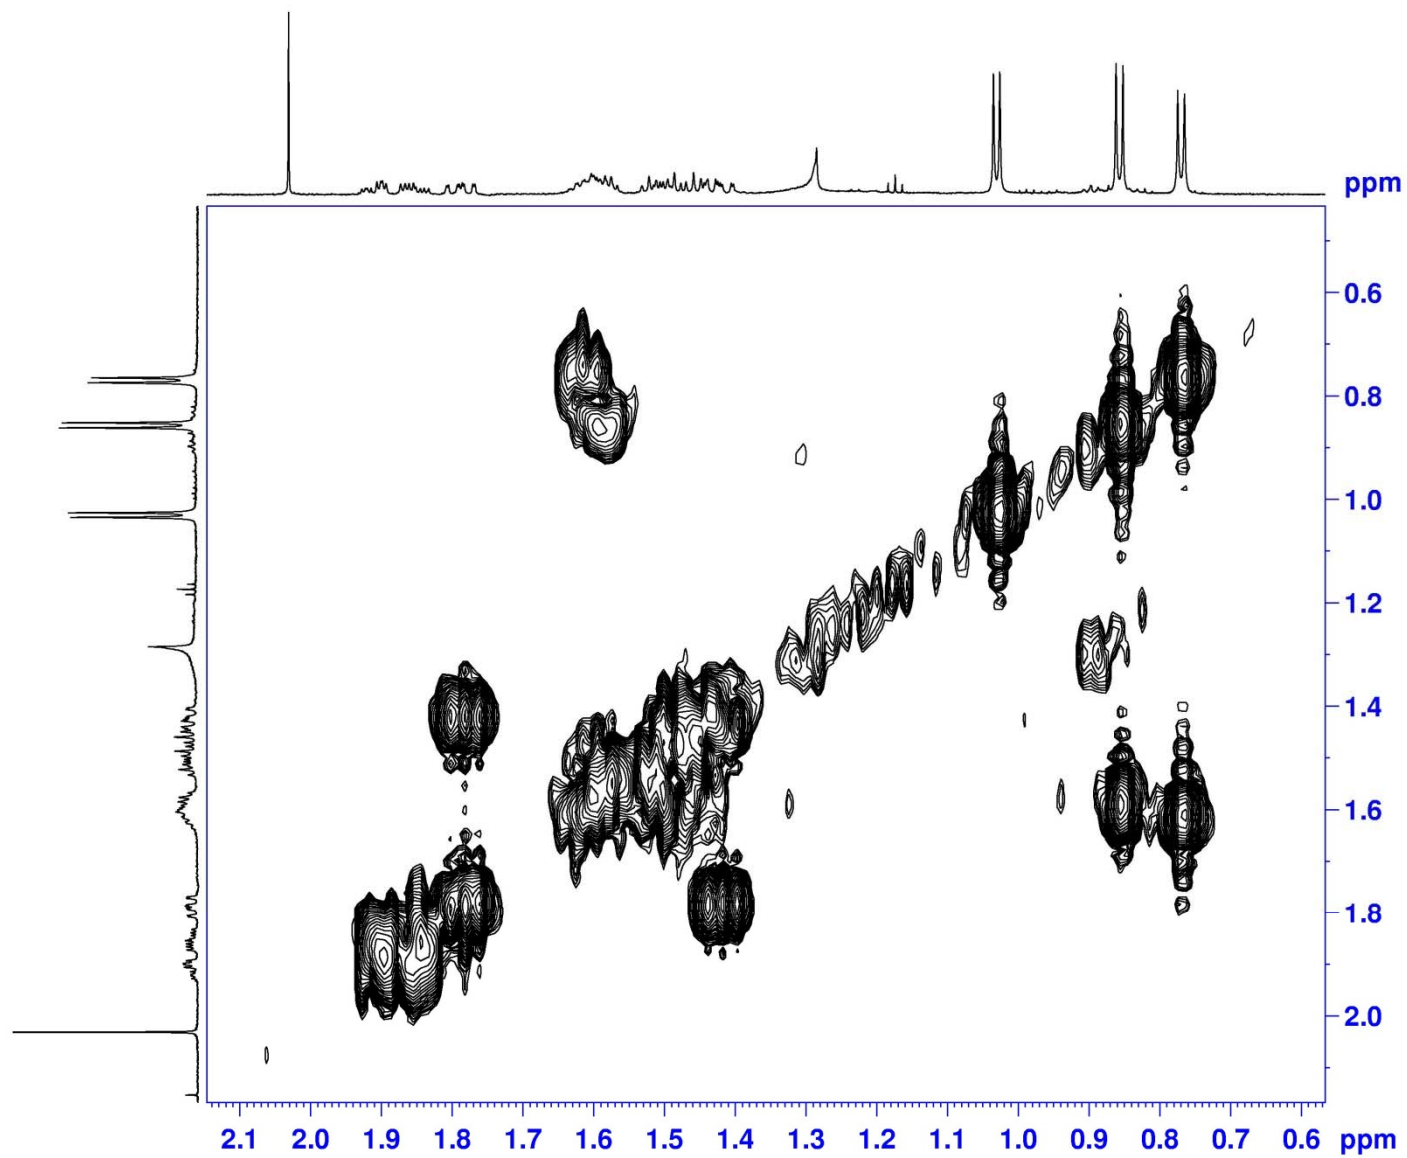

$^1\text{H}$ - $^1\text{H}$  COSY (700 MHz) spectrum of the fragment **1A**'s in  $\text{CD}_3\text{OD}$

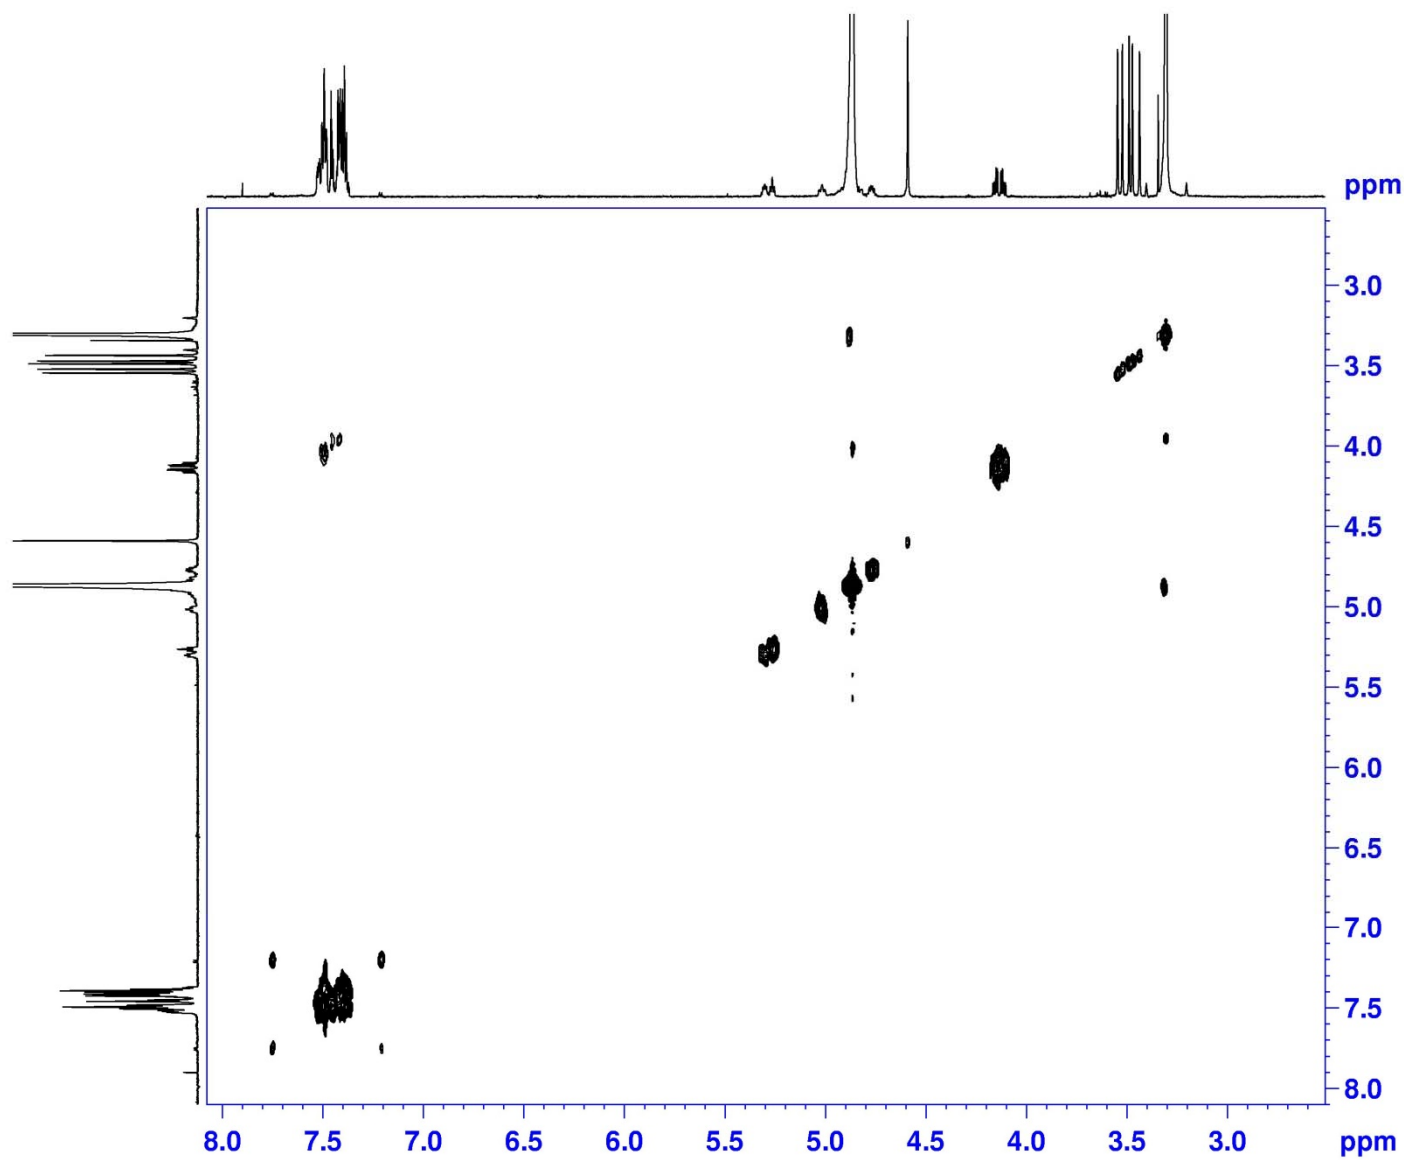

$^1\text{H}$ - $^1\text{H}$  COSY (700 MHz) spectrum of the fragment 1A's in  $\text{CD}_3\text{OD}$

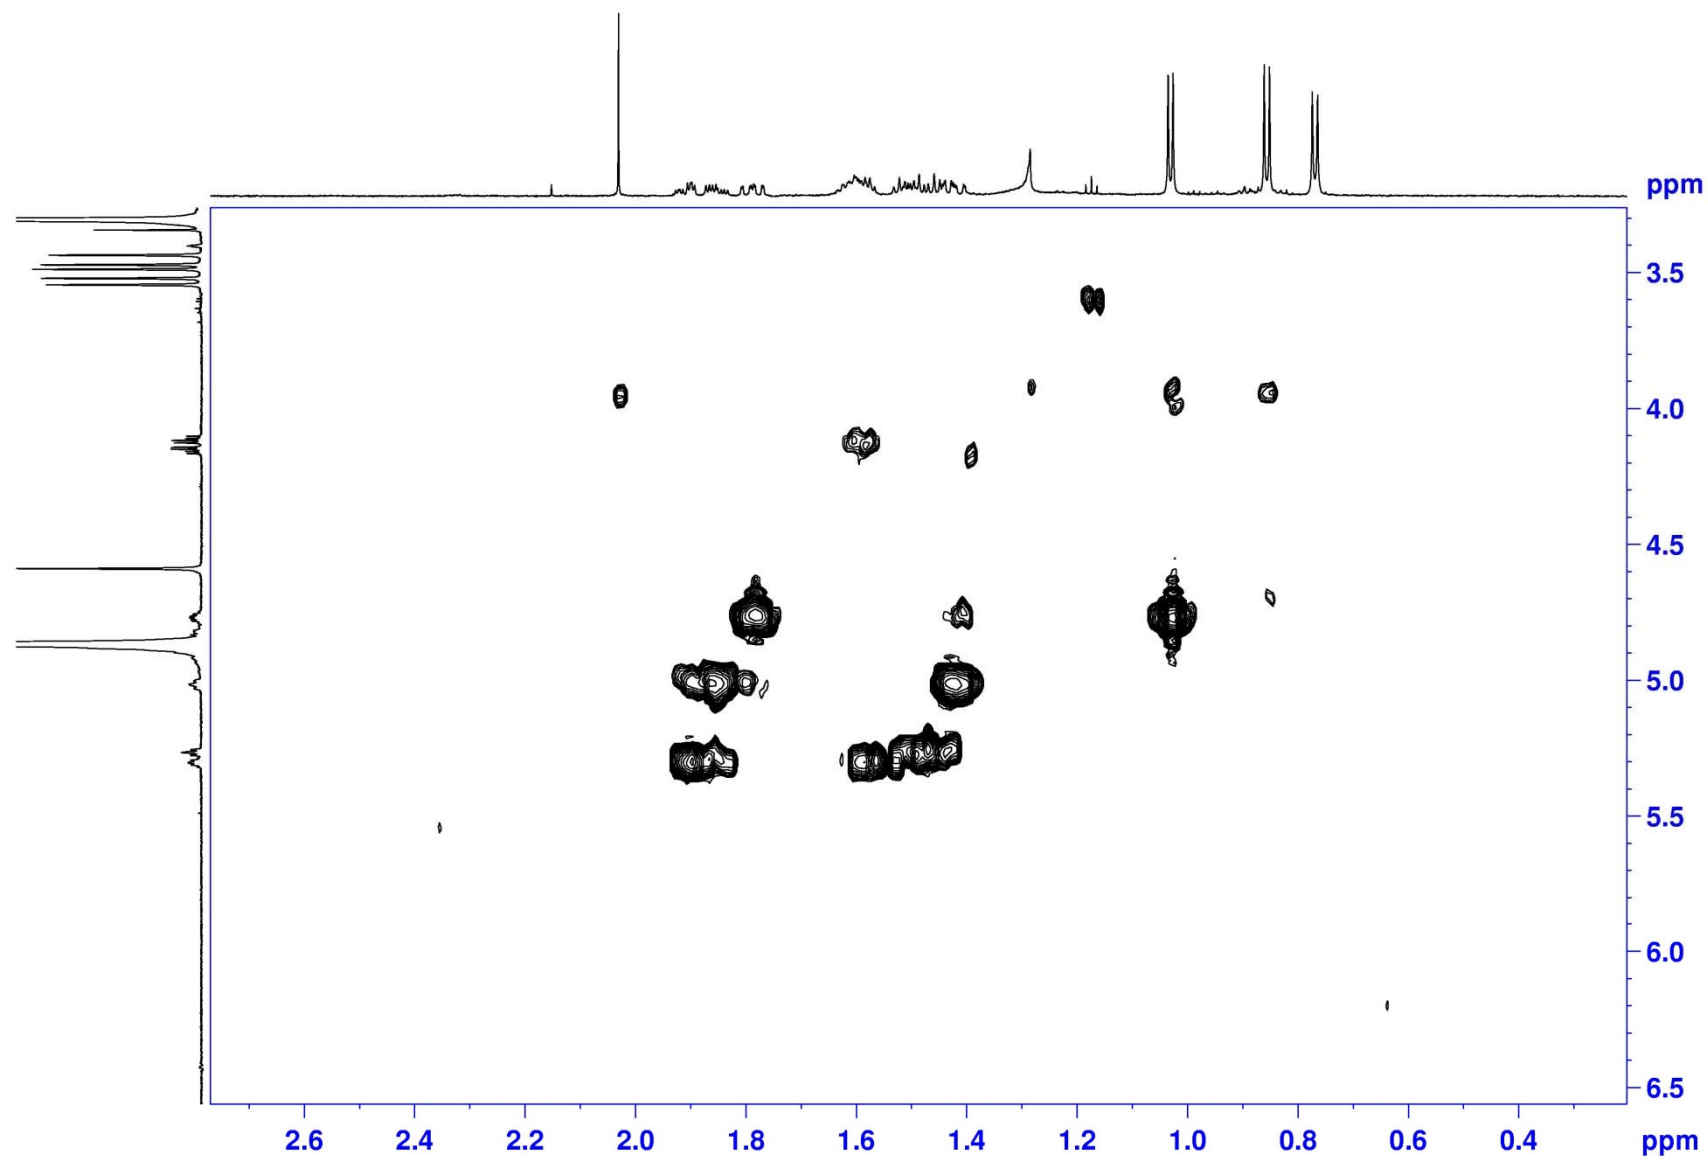

# LR-ESIMS for the fragment 1A'r

## Generic Display Report

### Analysis Info

|               |                                                                            |                  |                     |
|---------------|----------------------------------------------------------------------------|------------------|---------------------|
| Analysis Name | D:\Data\amaZon SLIMS\data\202011\jiangzhongping_37-1-O3-2-R-2_97_01_2314.d | Acquisition Date | 2020-11-09 15:55:03 |
| Method        | 2314.m                                                                     | Operator         | bruker              |
| Sample Name   | jiangzhongping_37-1-O3-2-R-2                                               | Instrument       | amaZon SL           |
| Comment       |                                                                            |                  |                     |

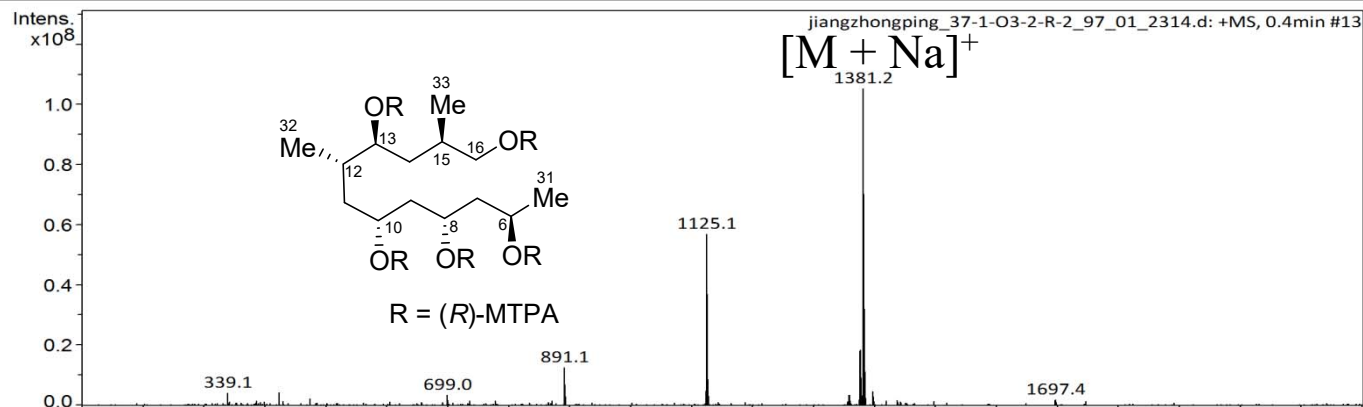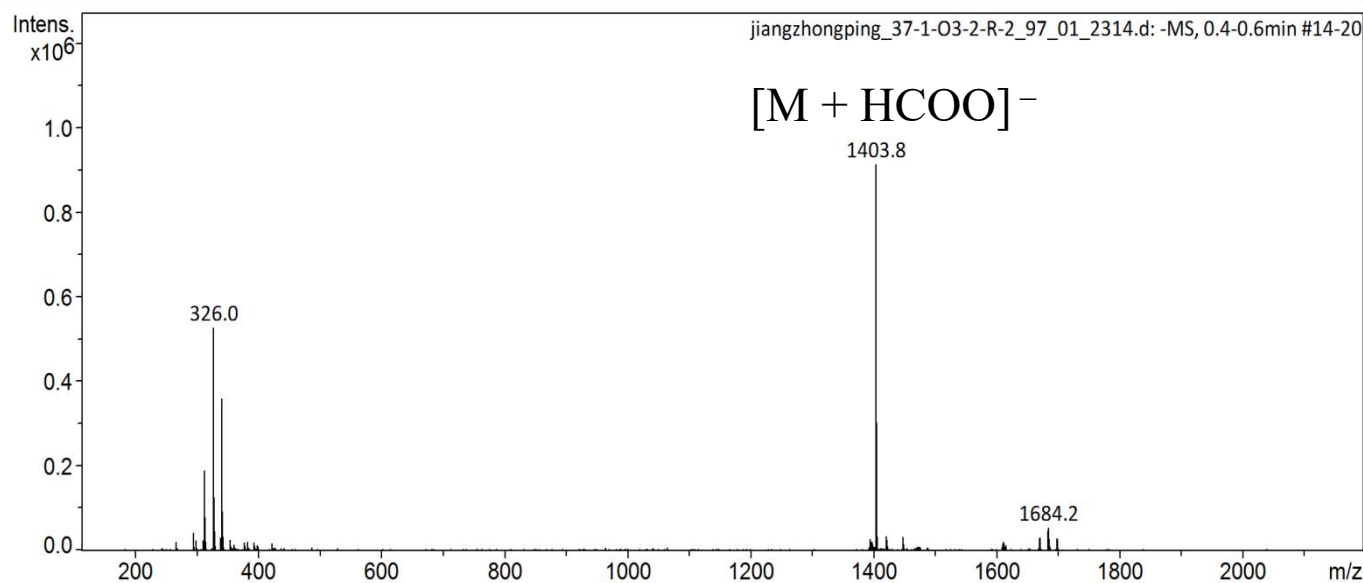



$^1\text{H}$  (700 MHz) NMR spectrum of the fragment **1A'r** in  $\text{CD}_3\text{OD}$

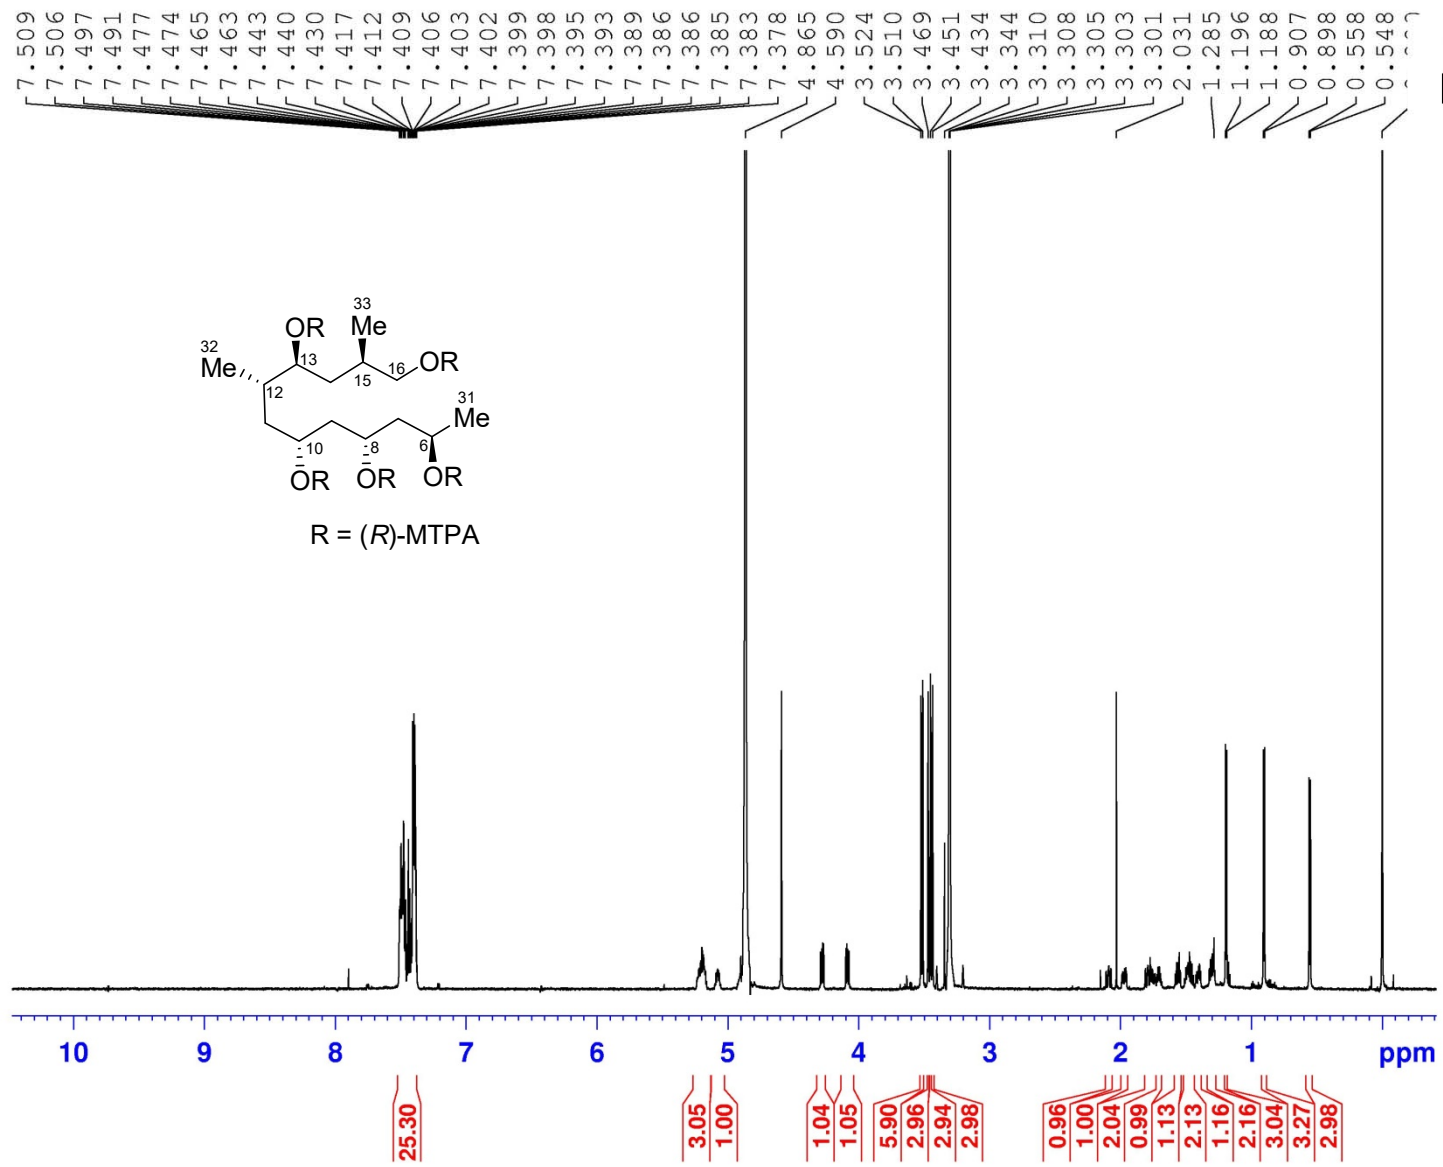

<sup>1</sup>H (700 MHz) NMR spectrum of the fragment **1A'r** in CD<sub>3</sub>OD

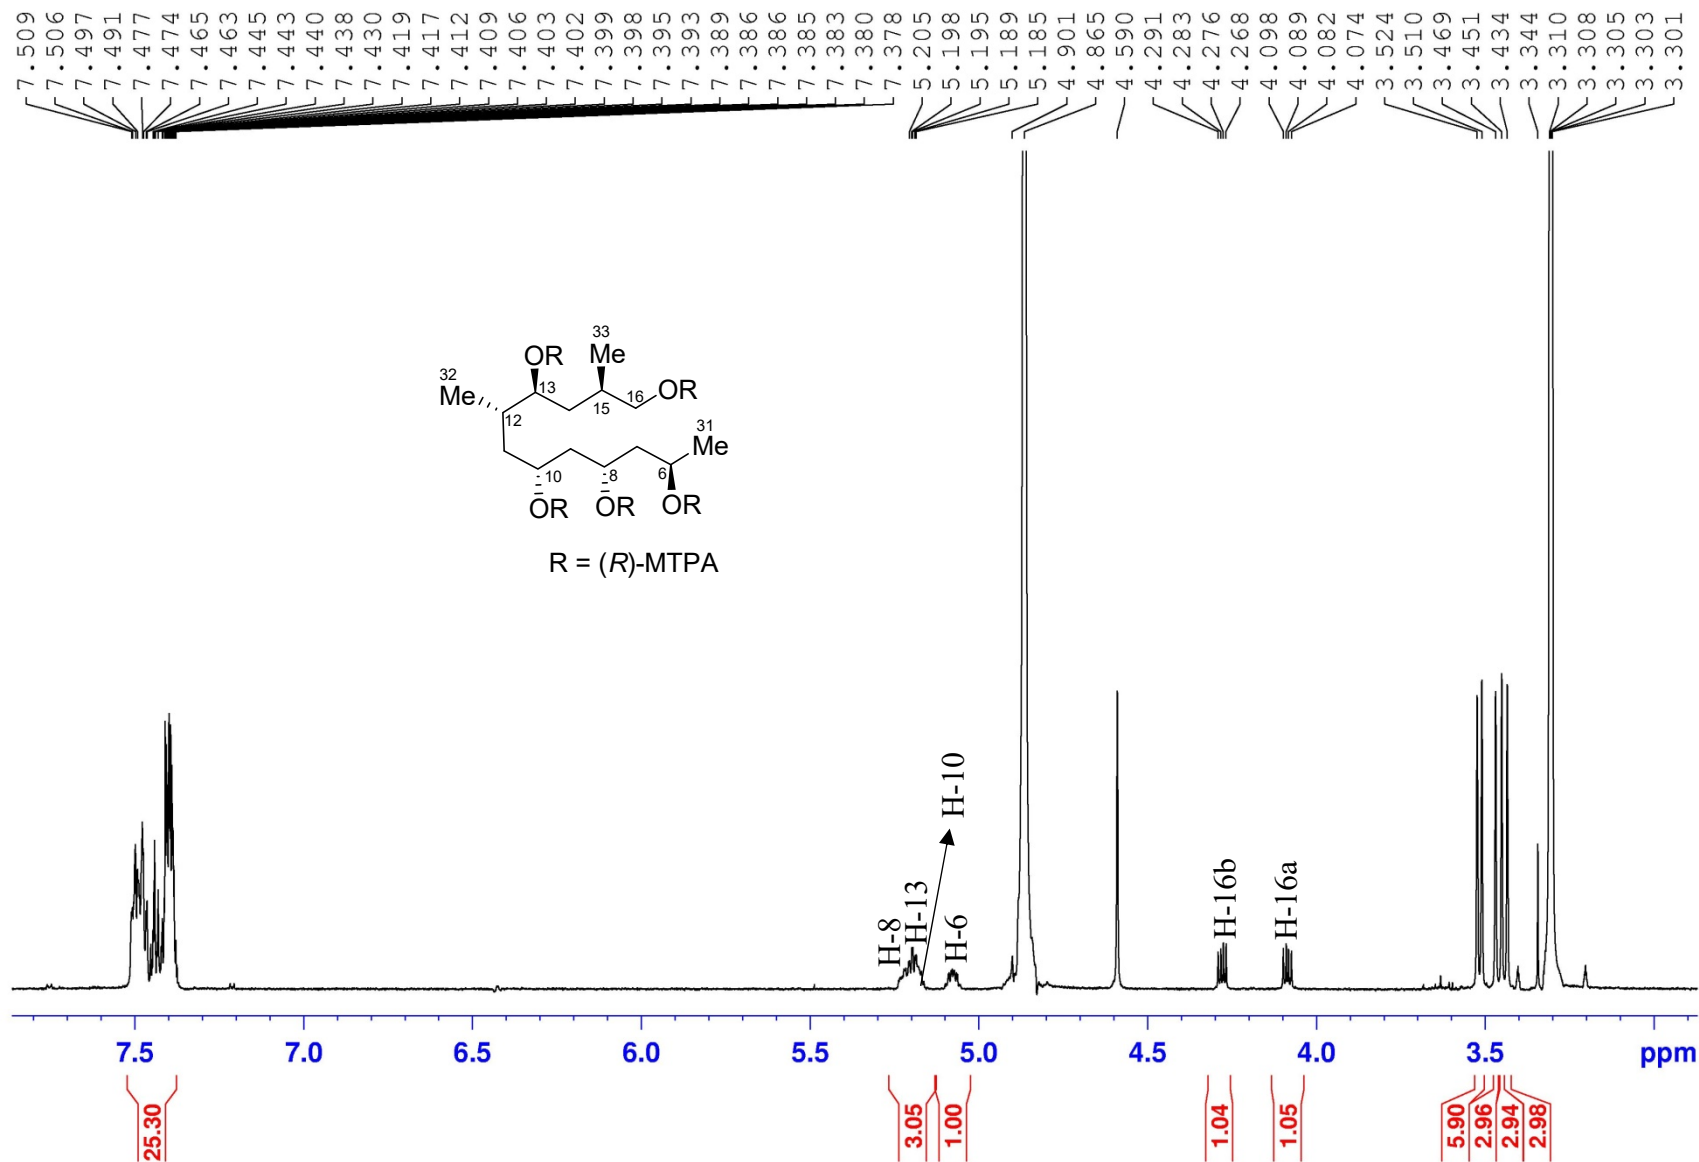

$^1\text{H}$  (700 MHz) NMR spectrum of the fragment **1A'r** in  $\text{CD}_3\text{OD}$

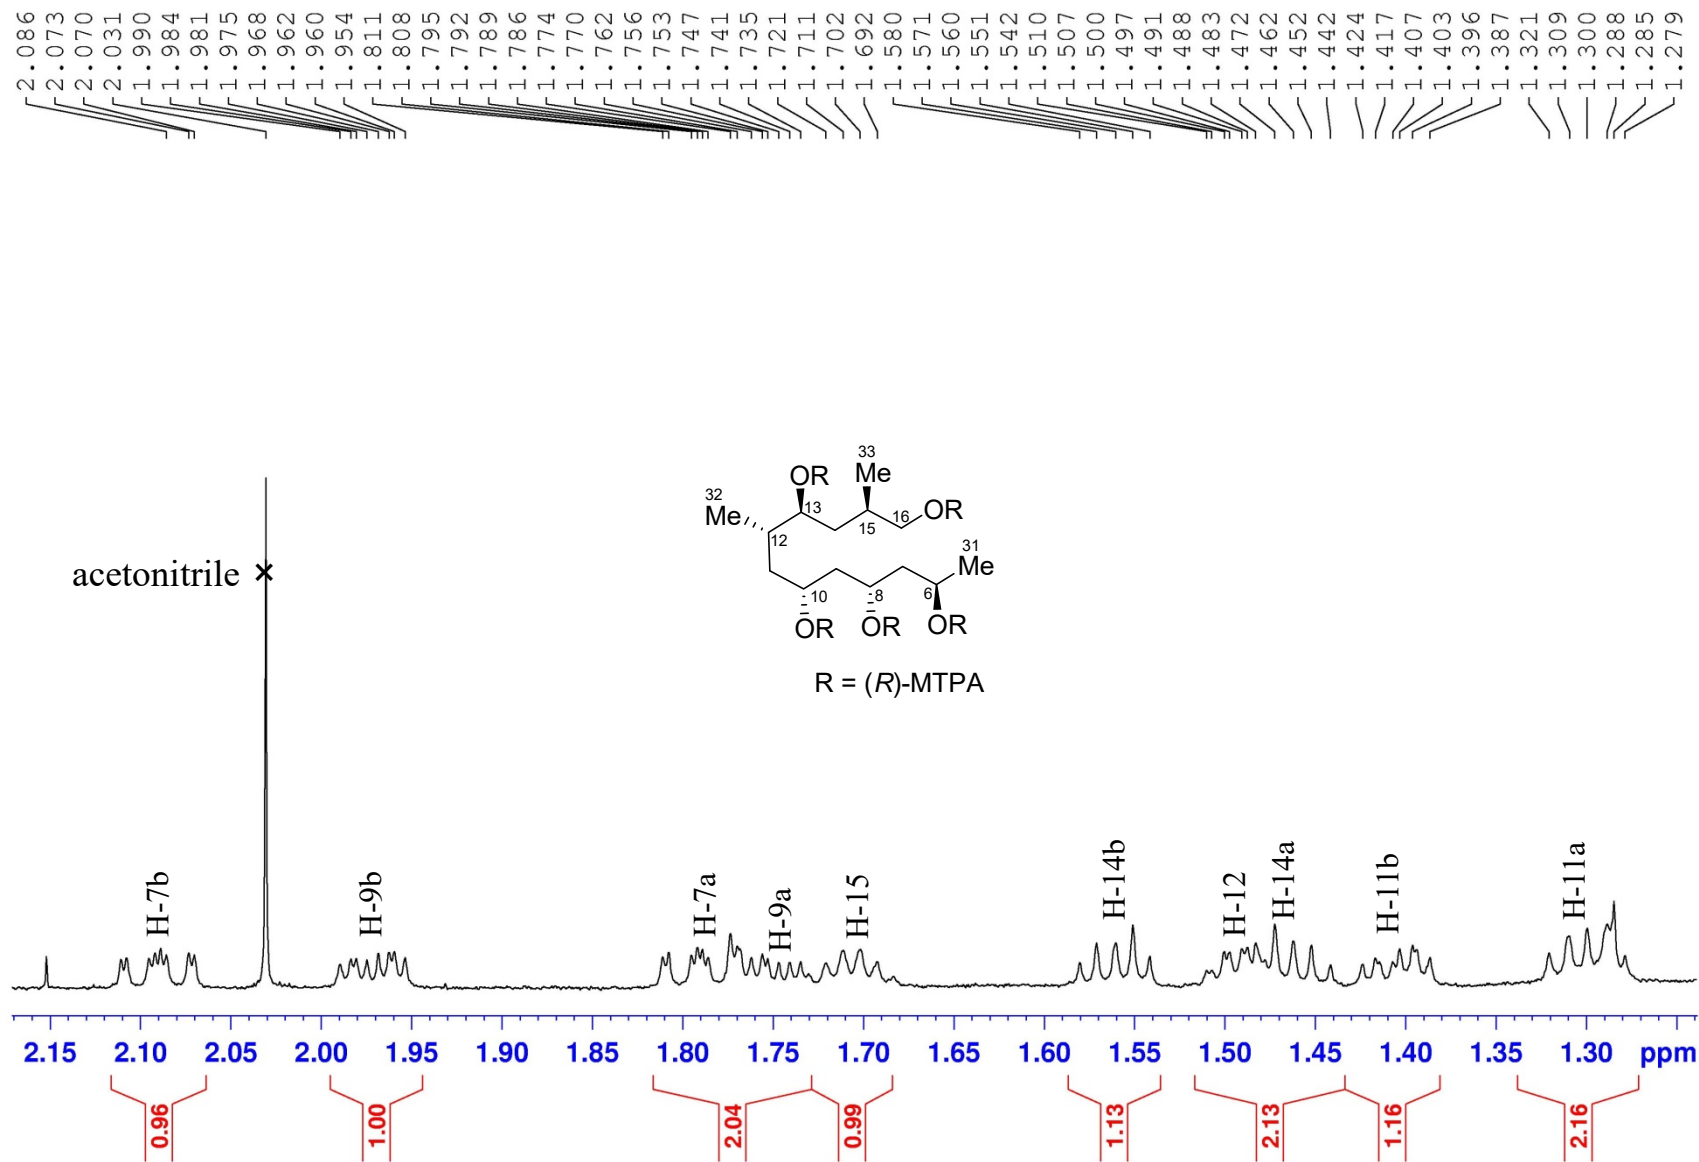

$^1\text{H}$  (700 MHz) NMR spectrum of the fragment **1A'r** in  $\text{CD}_3\text{OD}$

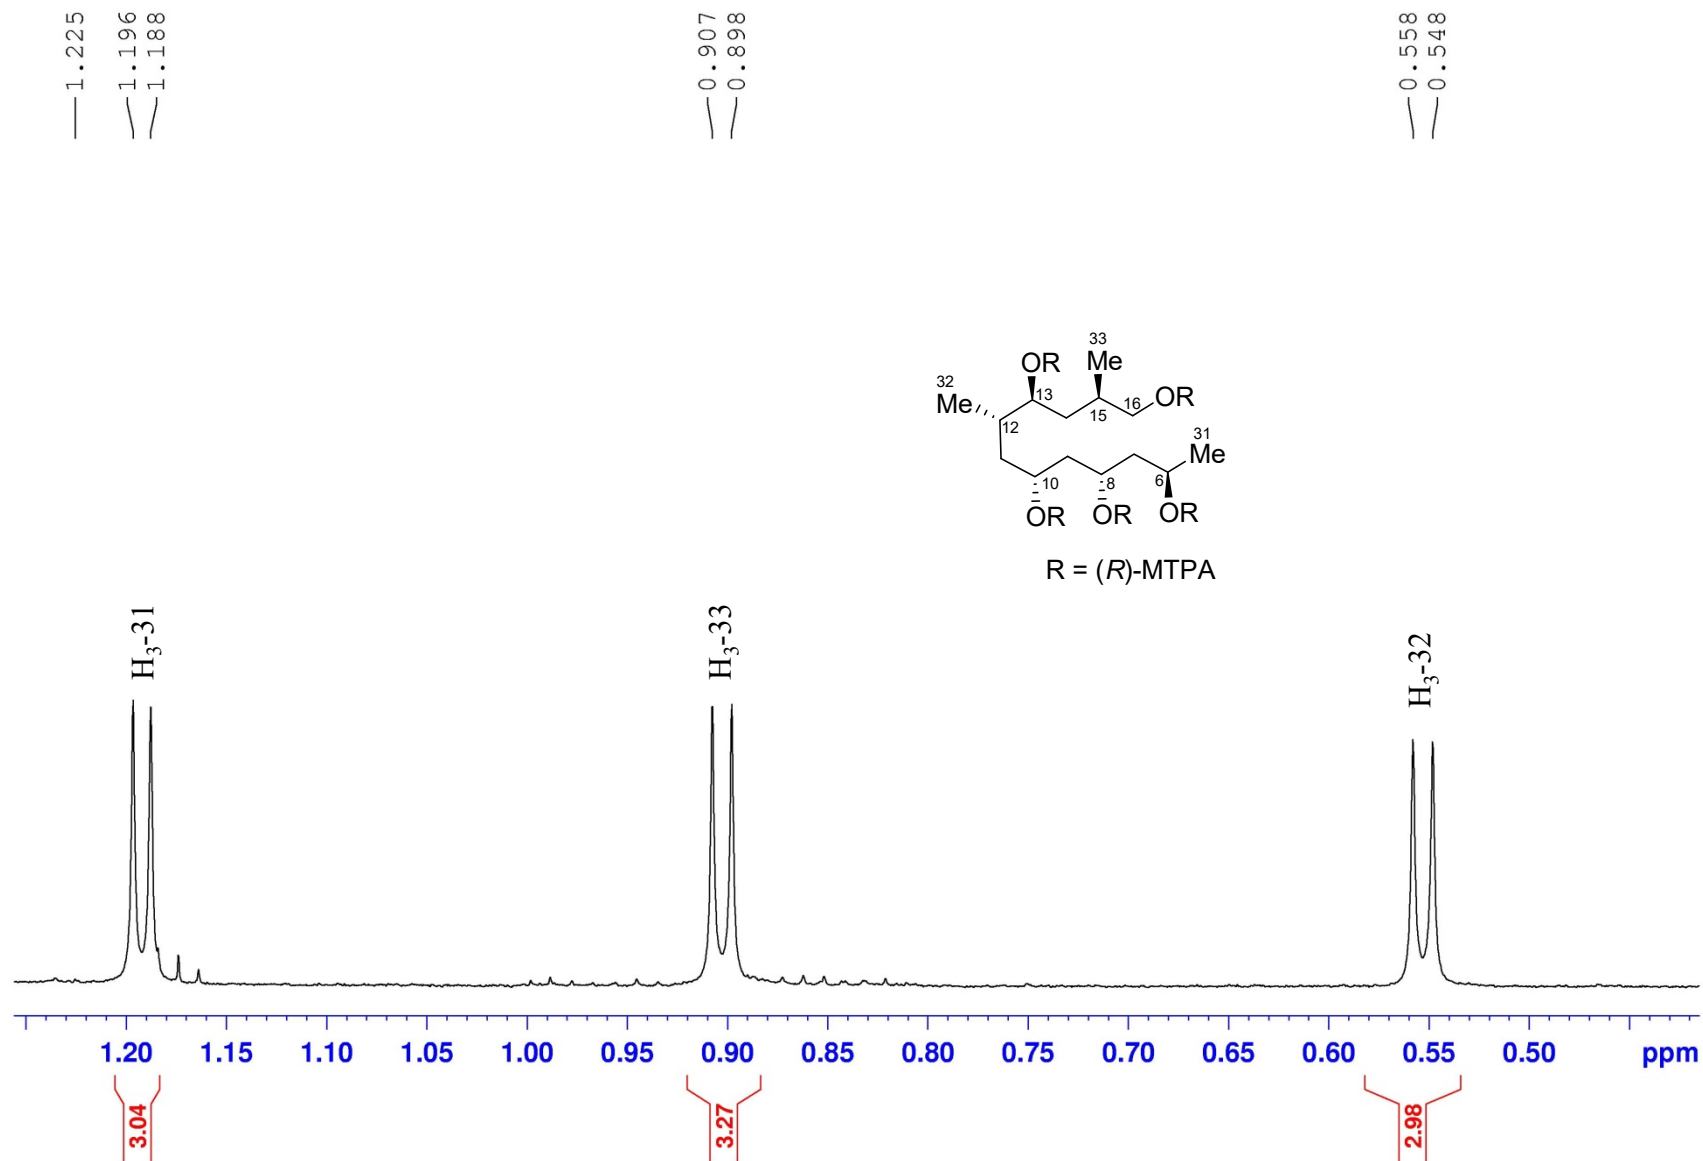

$^1\text{H}$ - $^1\text{H}$  COSY (700 MHz) spectrum of the fragment **1A'r** in  $\text{CD}_3\text{OD}$

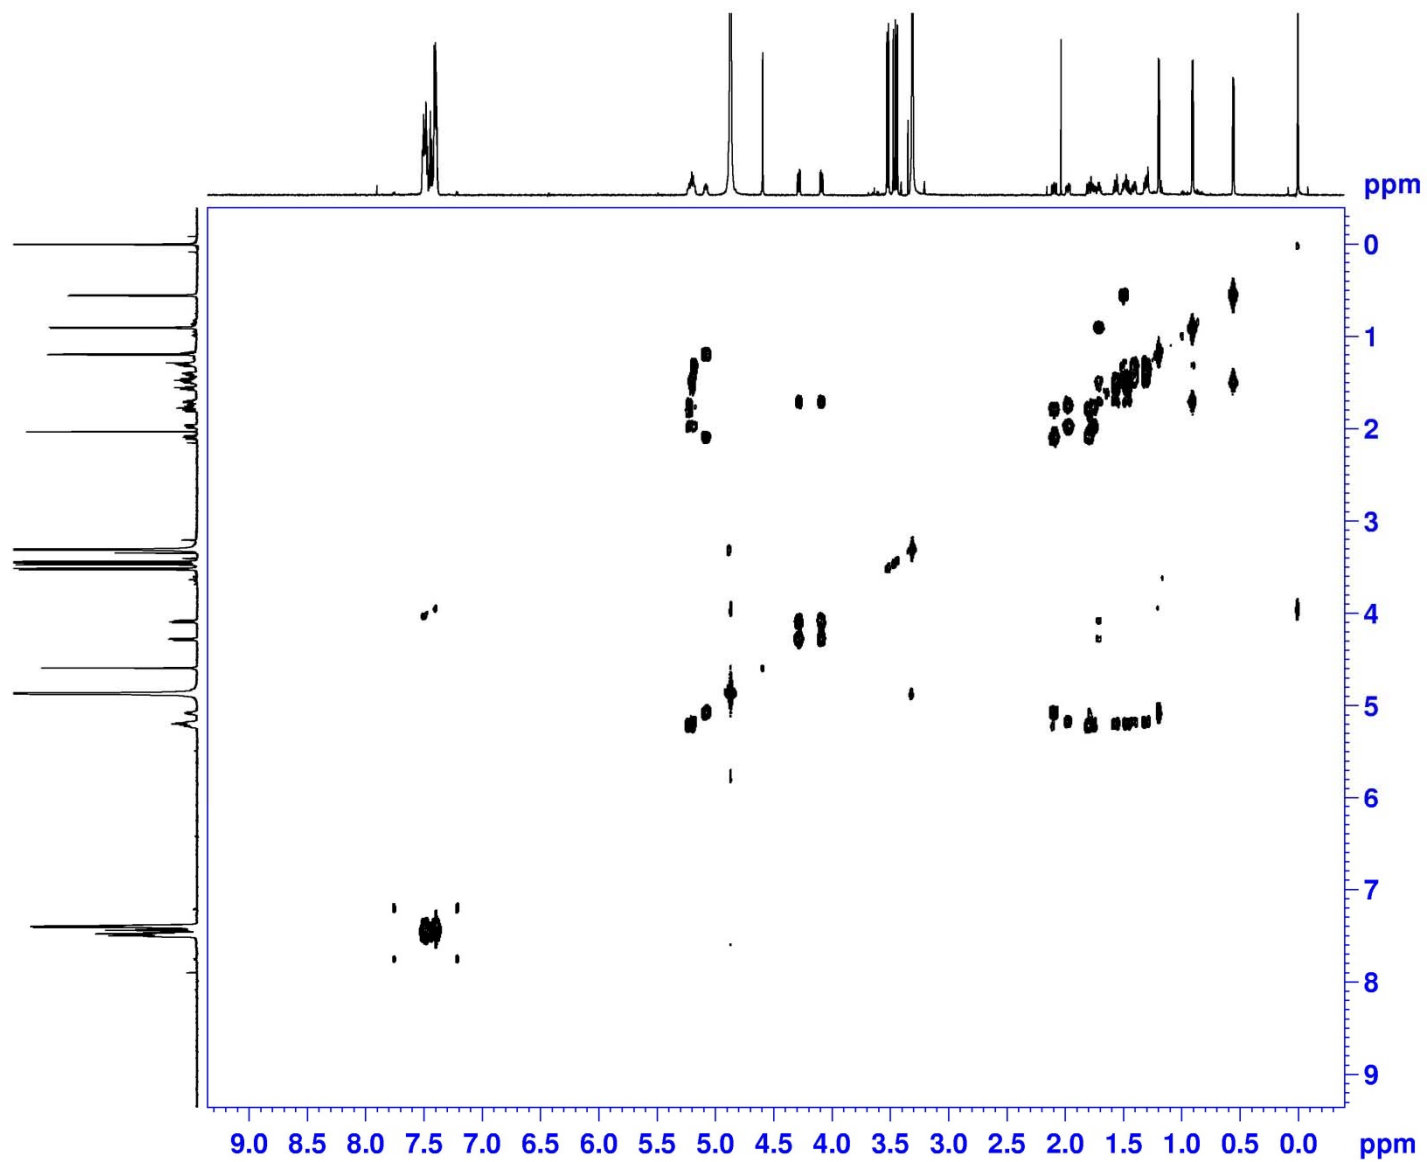

$^1\text{H}$ - $^1\text{H}$  COSY (700 MHz) spectrum of the fragment **1A'r** in  $\text{CD}_3\text{OD}$

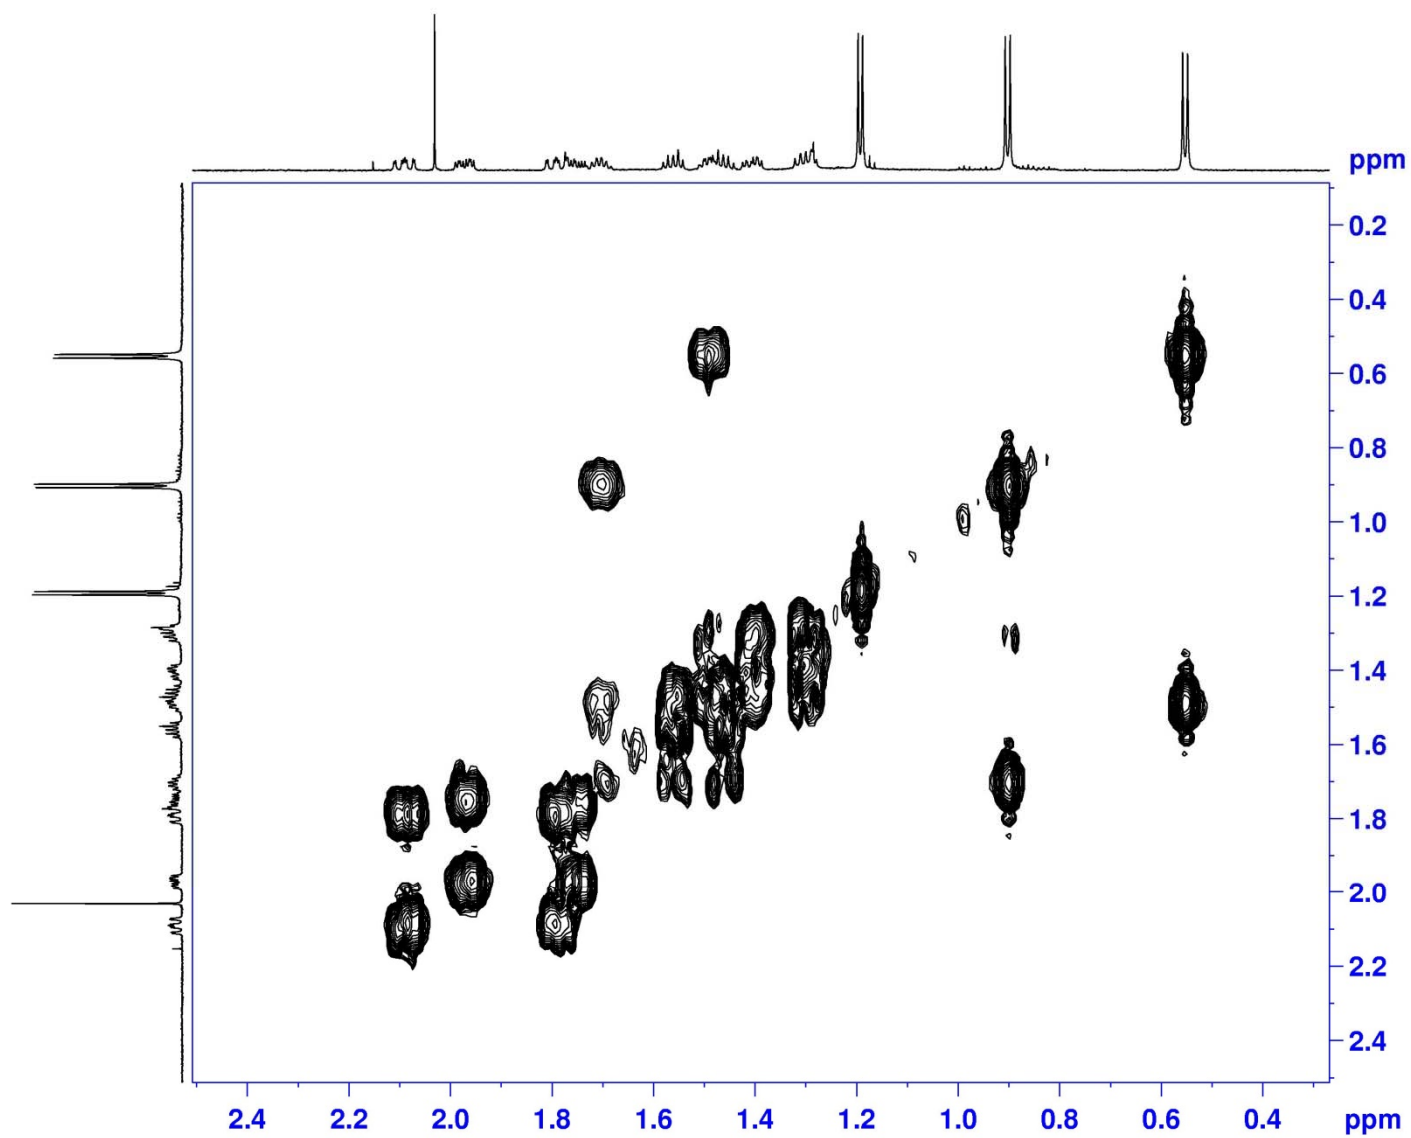

$^1\text{H}$ - $^1\text{H}$  COSY (700 MHz) spectrum of the fragment **1A'r** in  $\text{CD}_3\text{OD}$

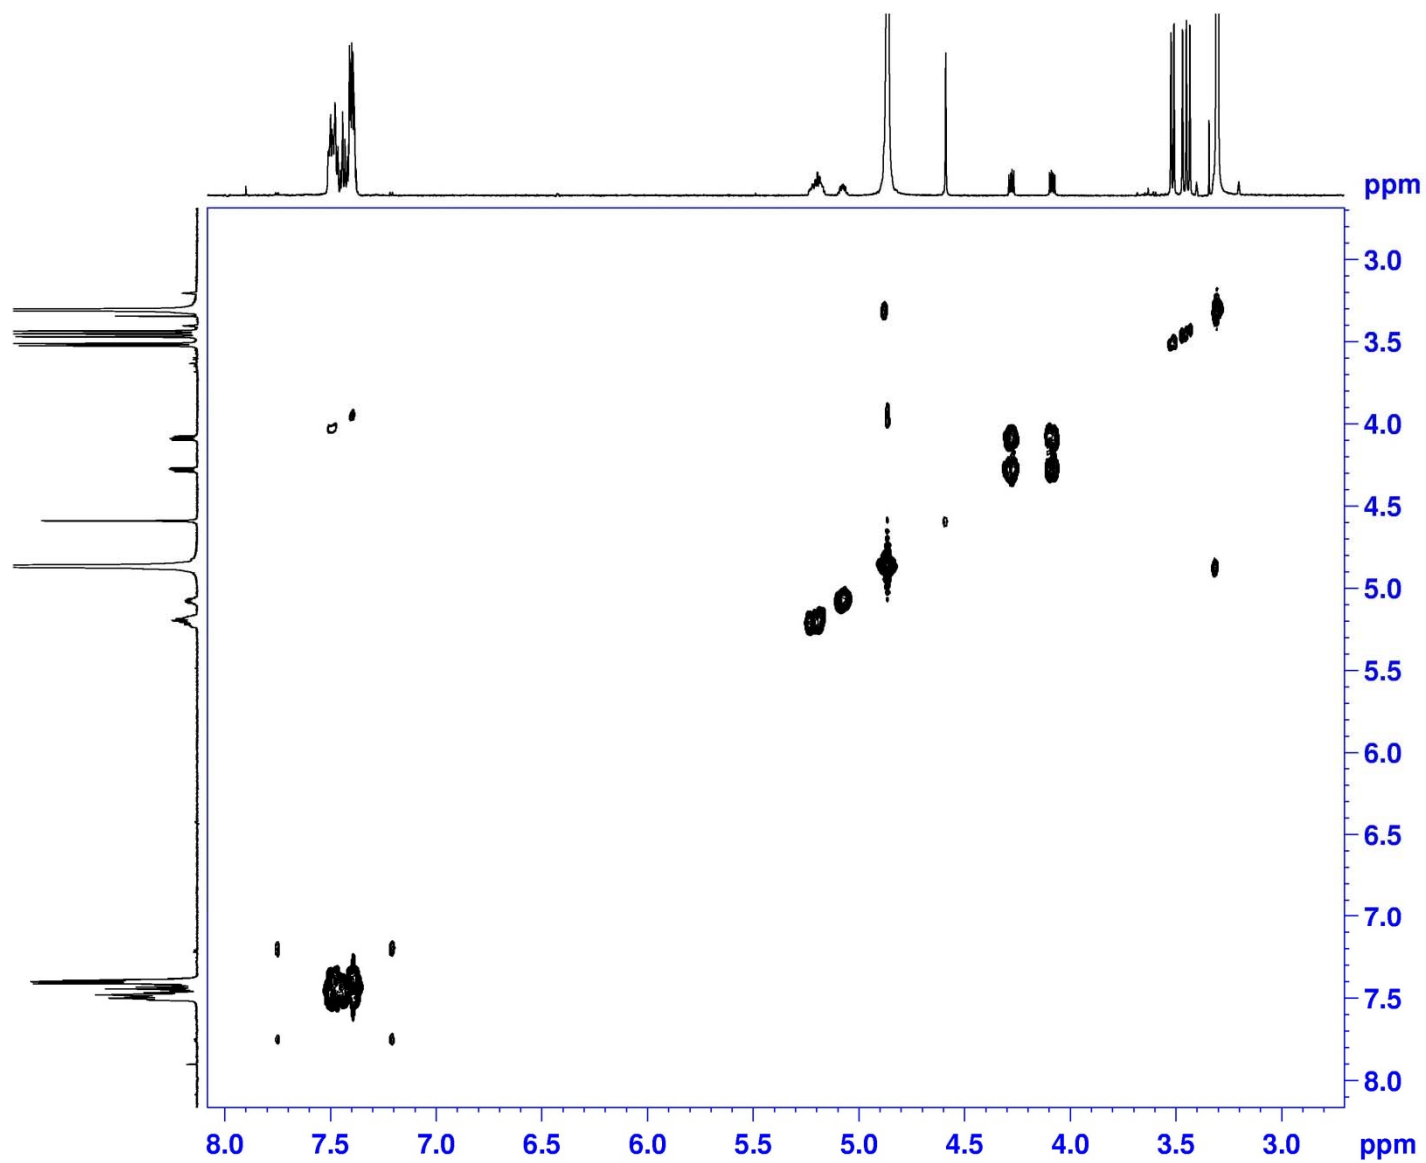

$^1\text{H}$ - $^1\text{H}$  COSY (700 MHz) spectrum of the fragment **1A'r** in  $\text{CD}_3\text{OD}$

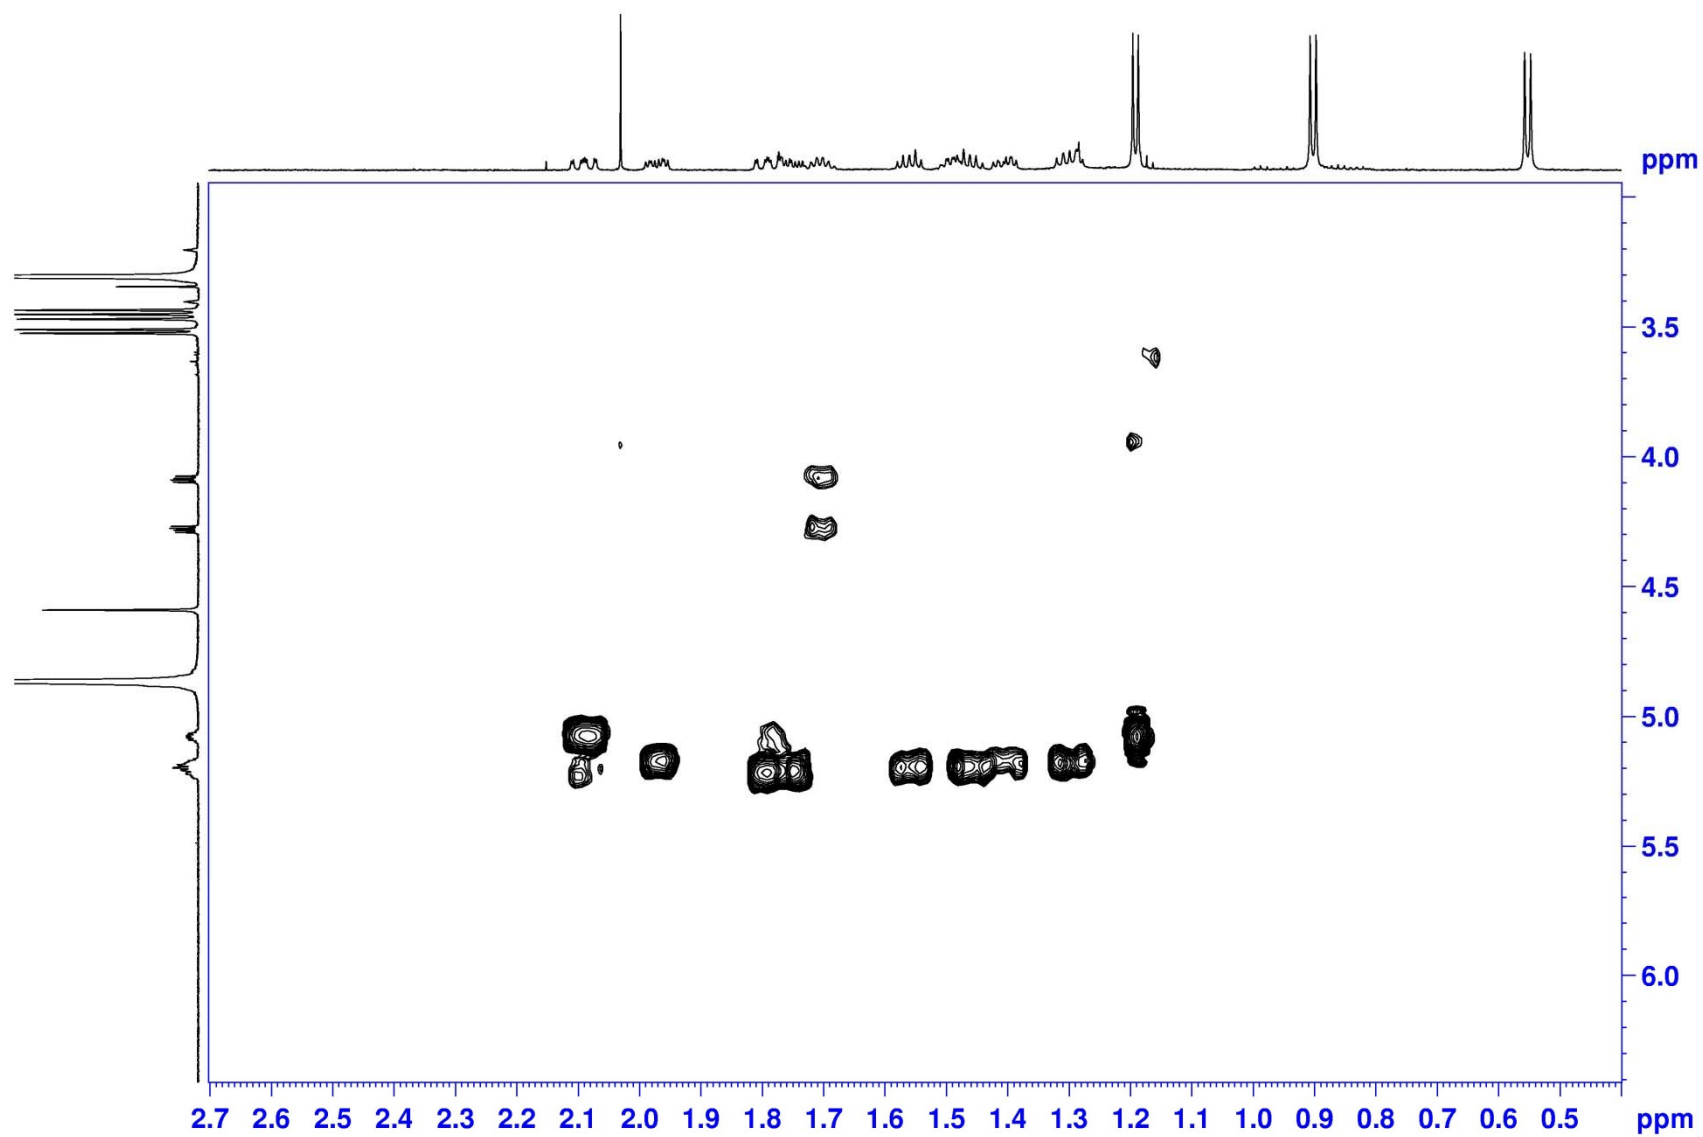



# LR-ESIMS for fragments 1Bs

## Generic Display Report

### Analysis Info

Analysis Name D:\Data\amaZon SLIMS\data\202011\jiangzhongping\_37-1-O3-1-S\_95\_01\_2312.d  
Method 2312.m  
Sample Name jiangzhongping\_37-1-O3-1-S  
Comment

Acquisition Date 2020-11-09 15:50:13  
Operator bruker  
Instrument amaZon SL

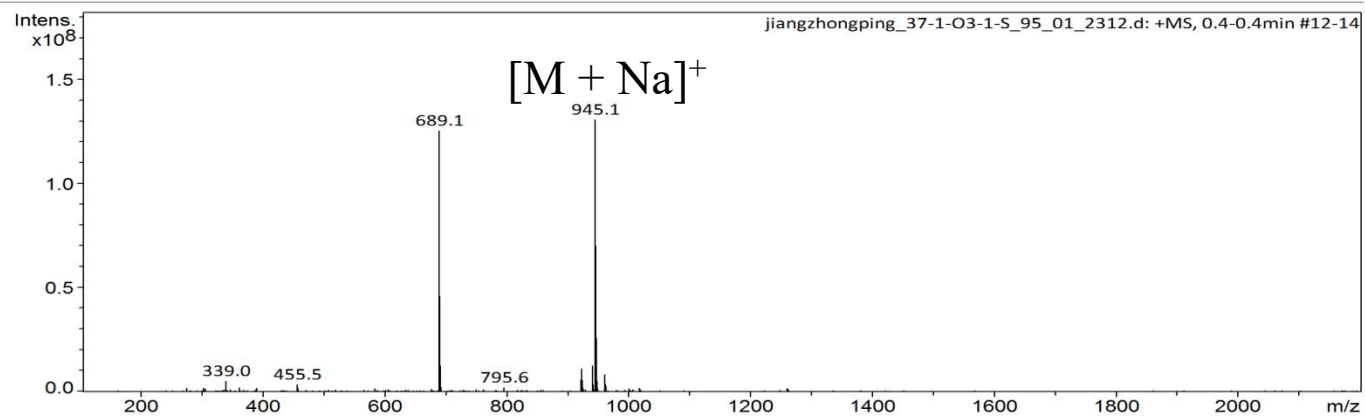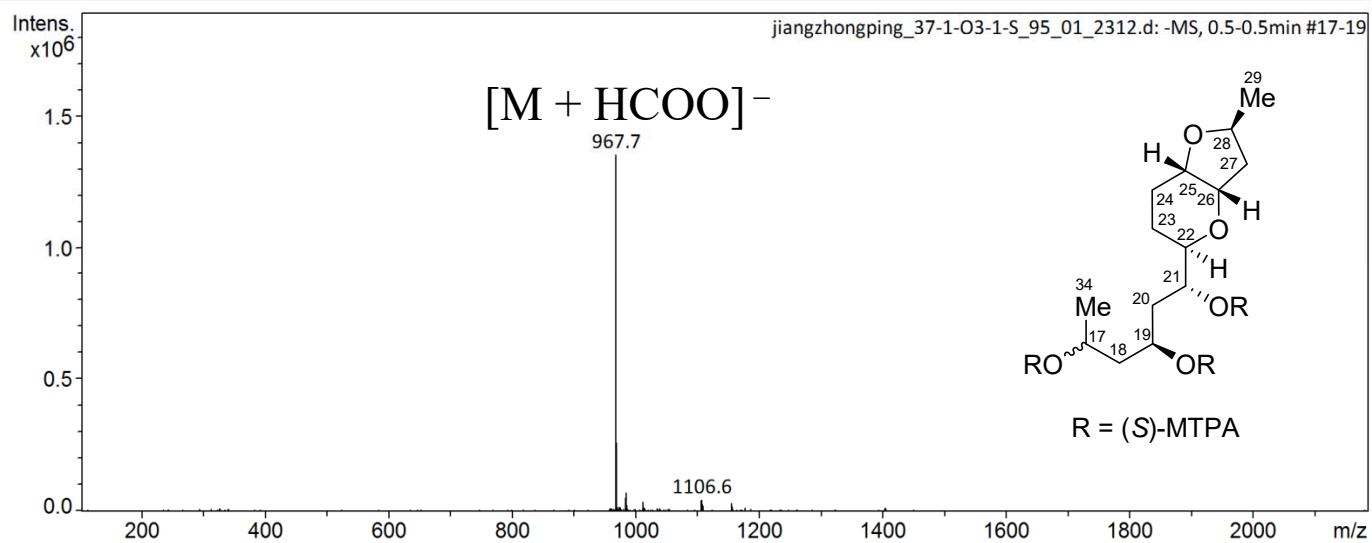

$^1\text{H}$  (600 MHz) NMR spectrum of fragments **1Bs** in  $\text{CD}_3\text{OD}$

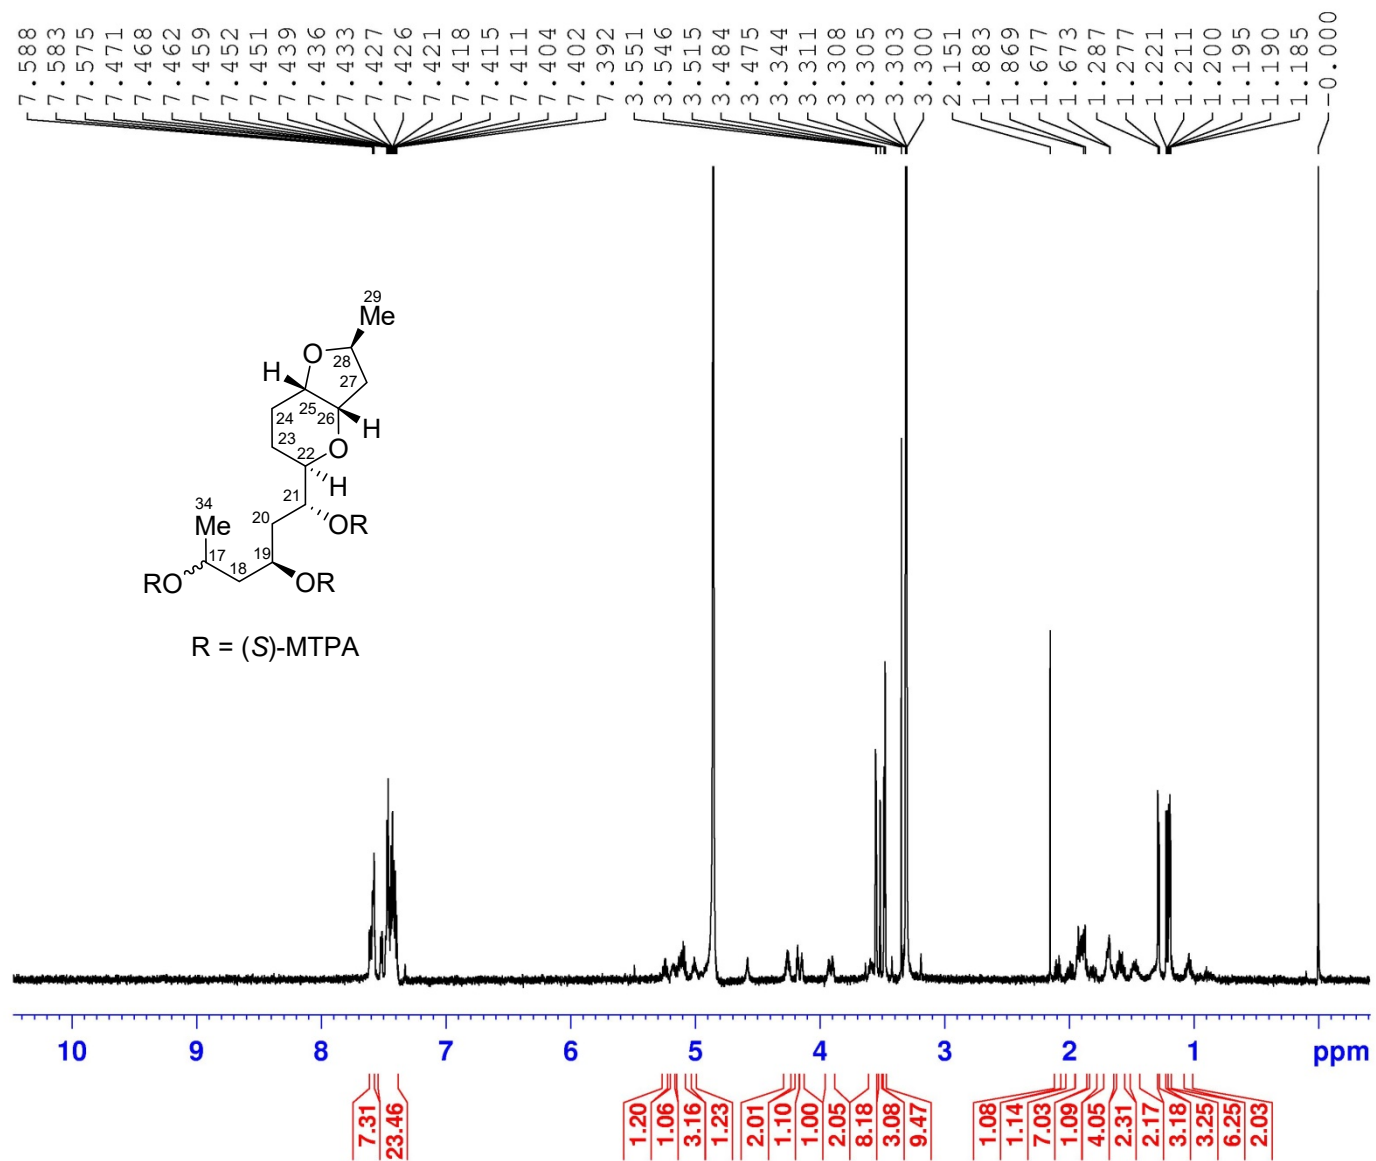

$^1\text{H}$  (600 MHz) NMR spectrum of fragments **1Bs** in  $\text{CD}_3\text{OD}$

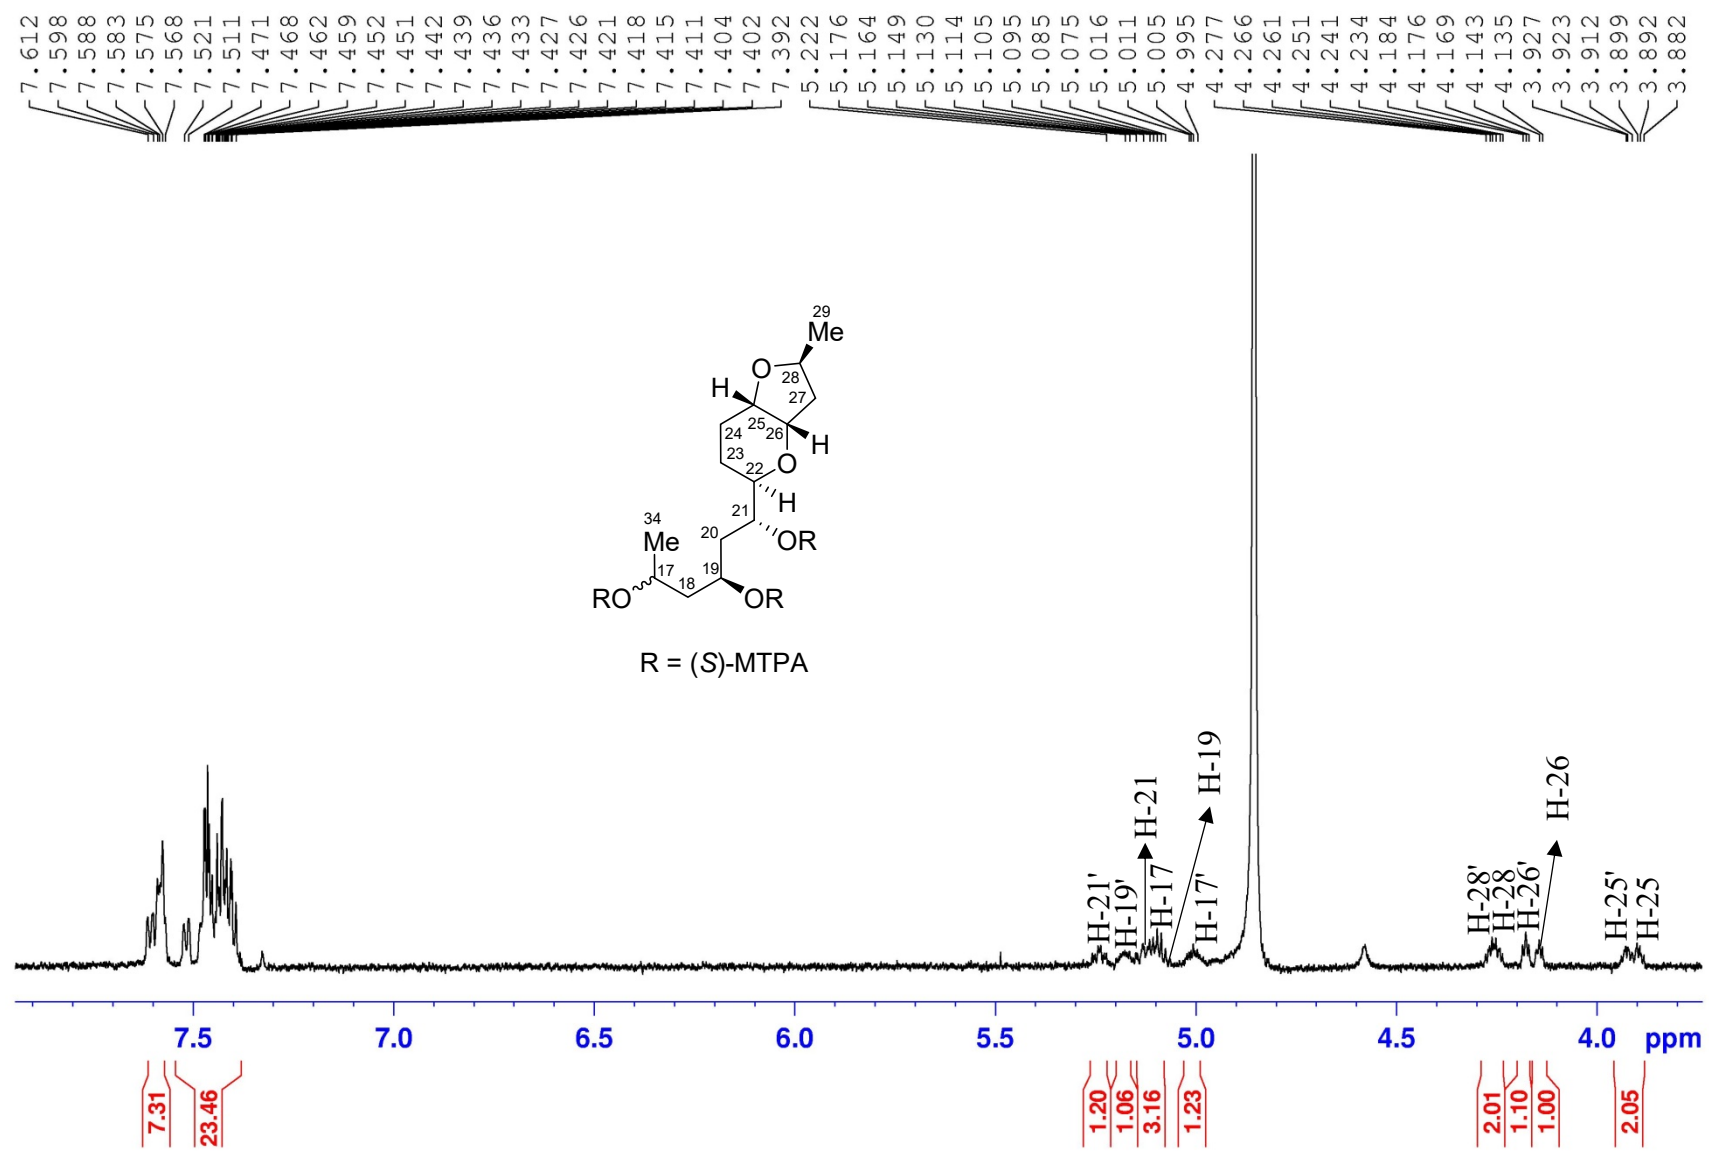



$^1\text{H}$ - $^1\text{H}$  COSY (600 MHz) spectrum of fragments **1Bs** in  $\text{CD}_3\text{OD}$

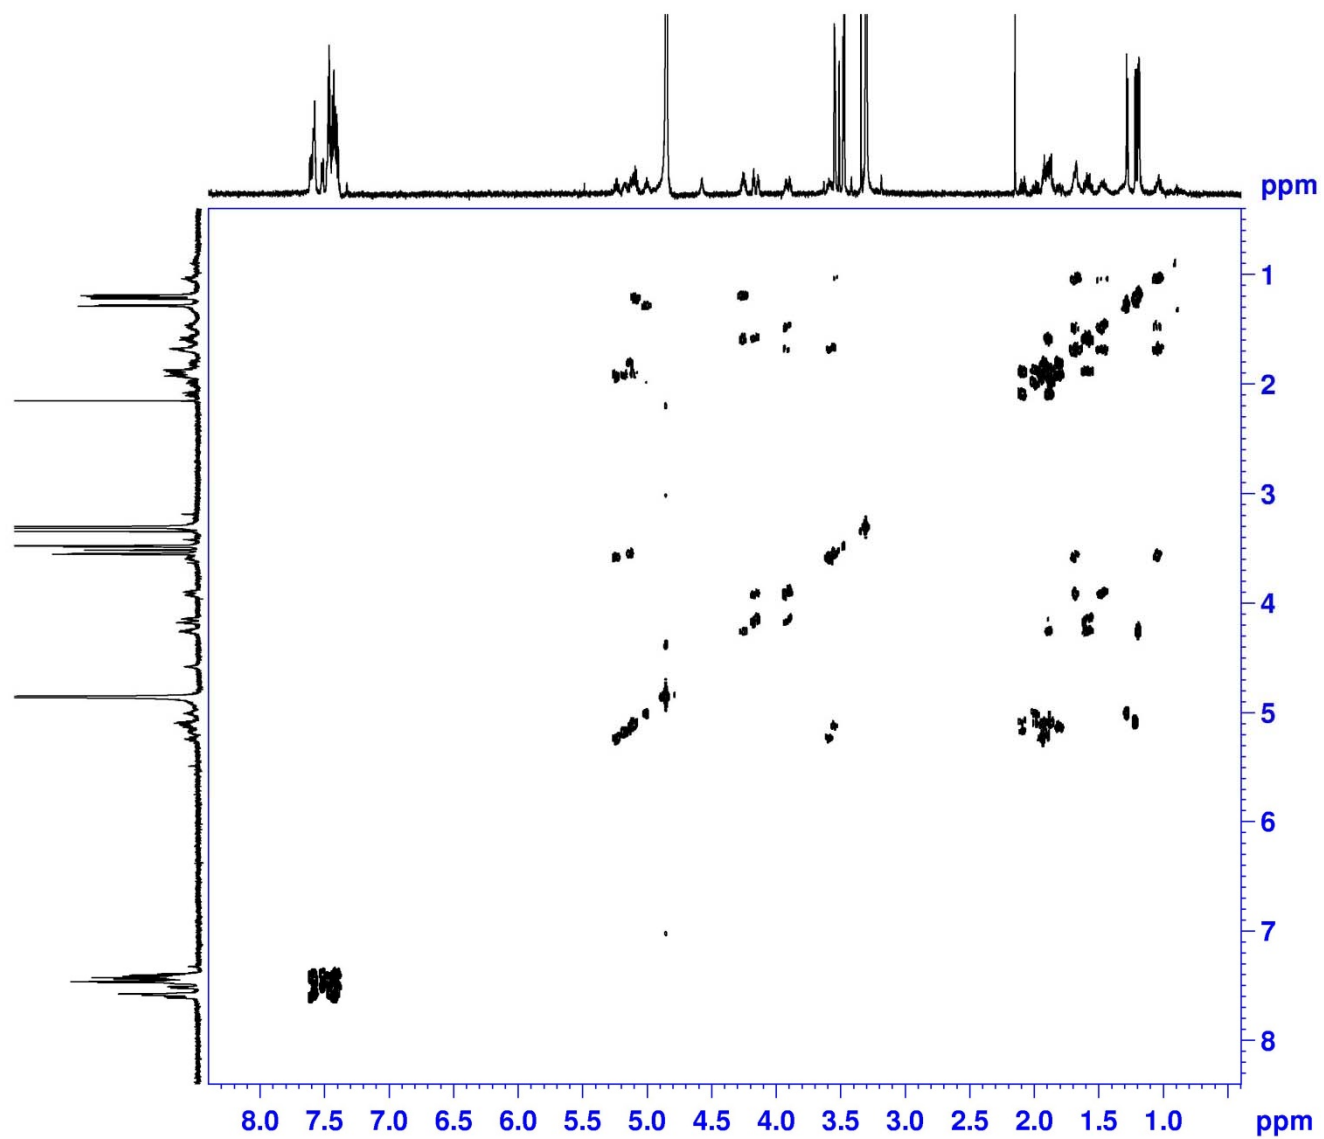

$^1\text{H}$ - $^1\text{H}$  COSY (600 MHz) spectrum of fragments **1Bs** in  $\text{CD}_3\text{OD}$

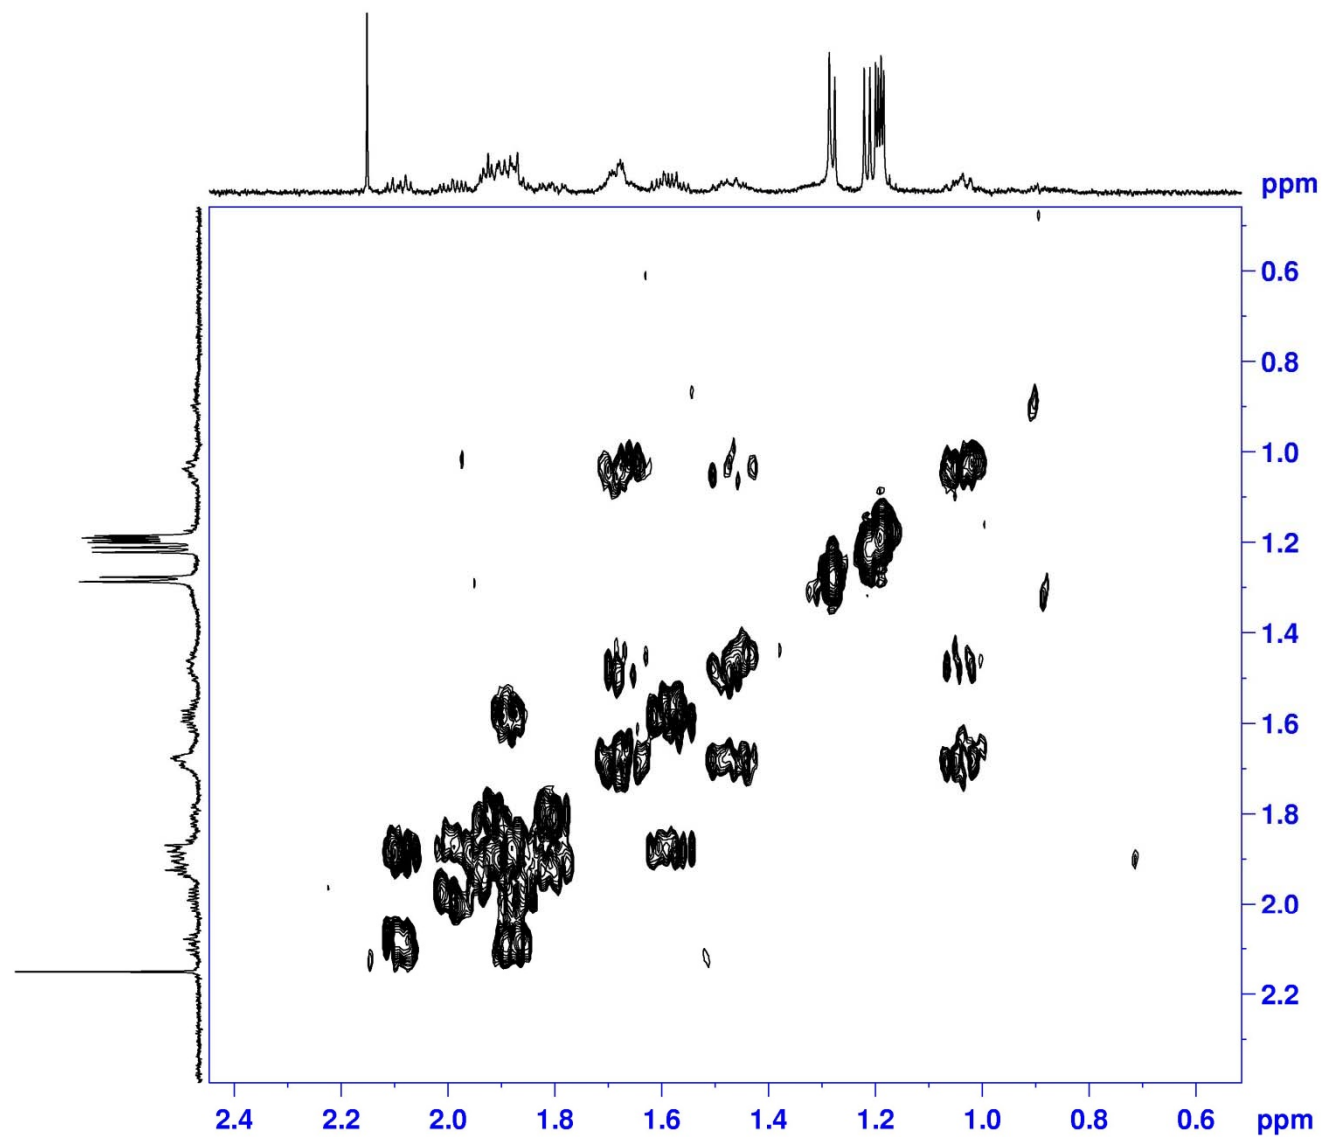

$^1\text{H}$ - $^1\text{H}$  COSY (600 MHz) spectrum of fragments **1Bs** in  $\text{CD}_3\text{OD}$

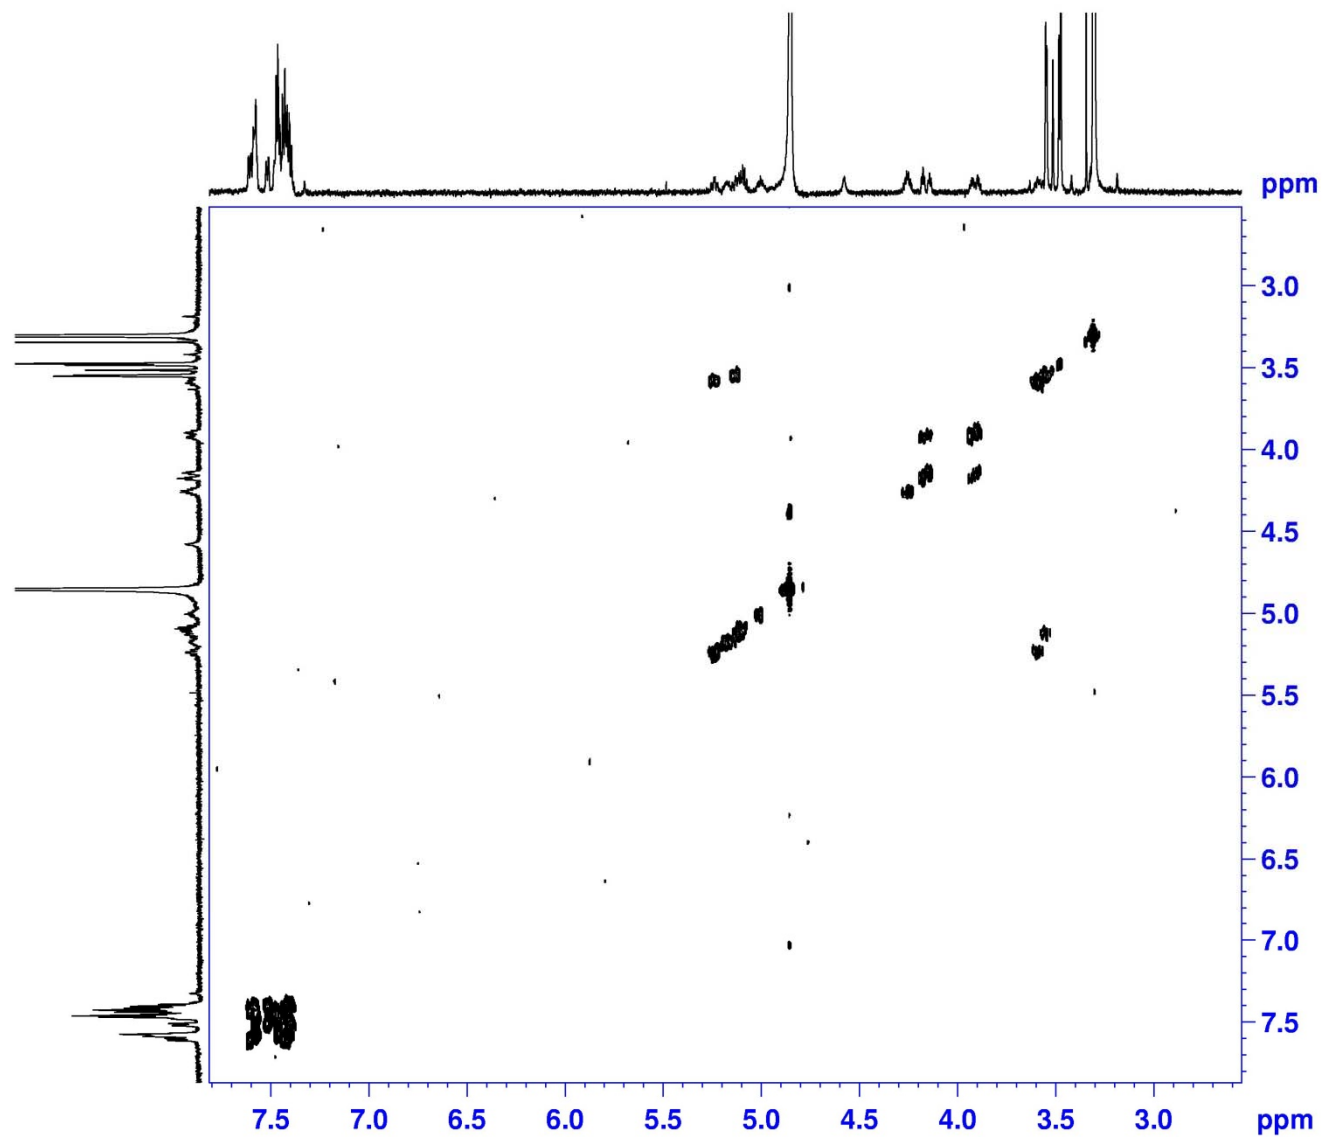

$^1\text{H}$ - $^1\text{H}$  COSY (600 MHz) spectrum of fragments **1Bs** in  $\text{CD}_3\text{OD}$

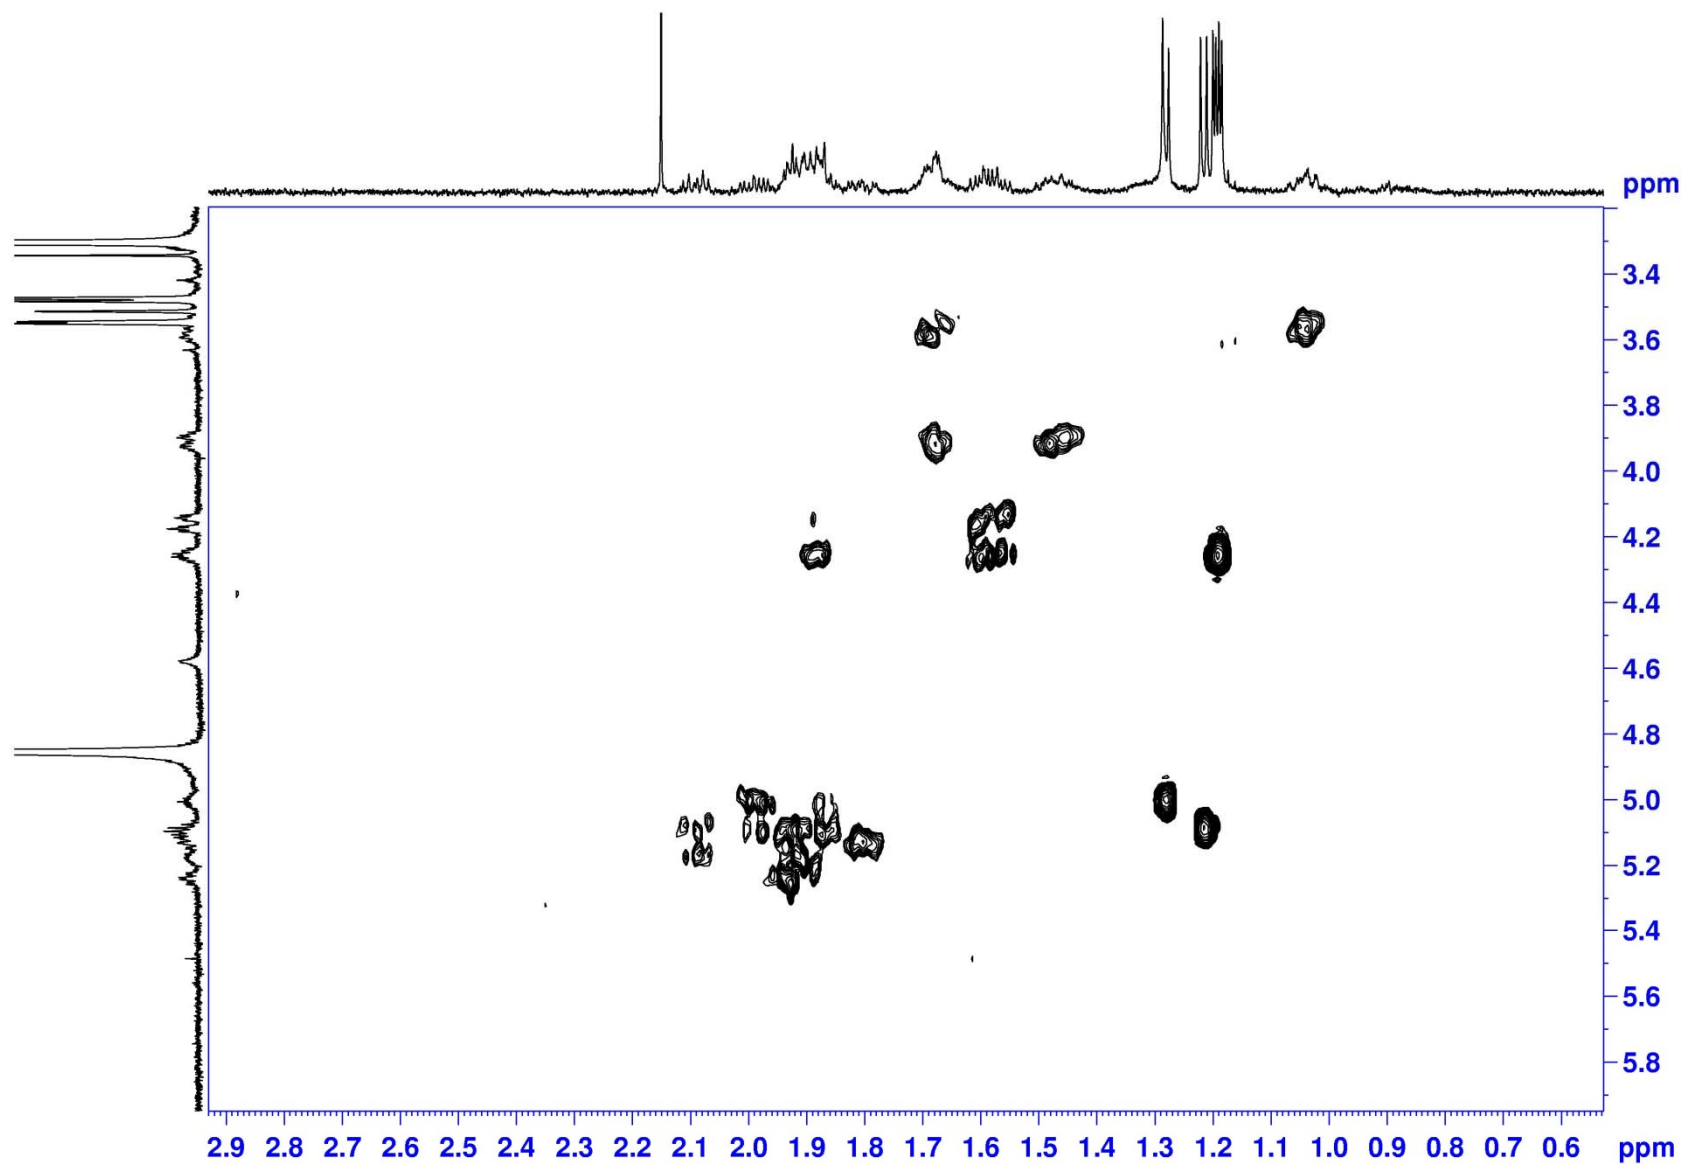



# LR-ESIMS for fragments 1Br

## Generic Display Report

### Analysis Info

|               |                                                                          |                  |                     |
|---------------|--------------------------------------------------------------------------|------------------|---------------------|
| Analysis Name | D:\Data\amaZon SL\MS\data\202011\jiangzhongping_37-1-O3-1-R_94_01_2311.d | Acquisition Date | 2020-11-09 15:47:49 |
| Method        | 2311.m                                                                   | Operator         | bruker              |
| Sample Name   | jiangzhongping_37-1-O3-1-R                                               | Instrument       | amaZon SL           |
| Comment       |                                                                          |                  |                     |

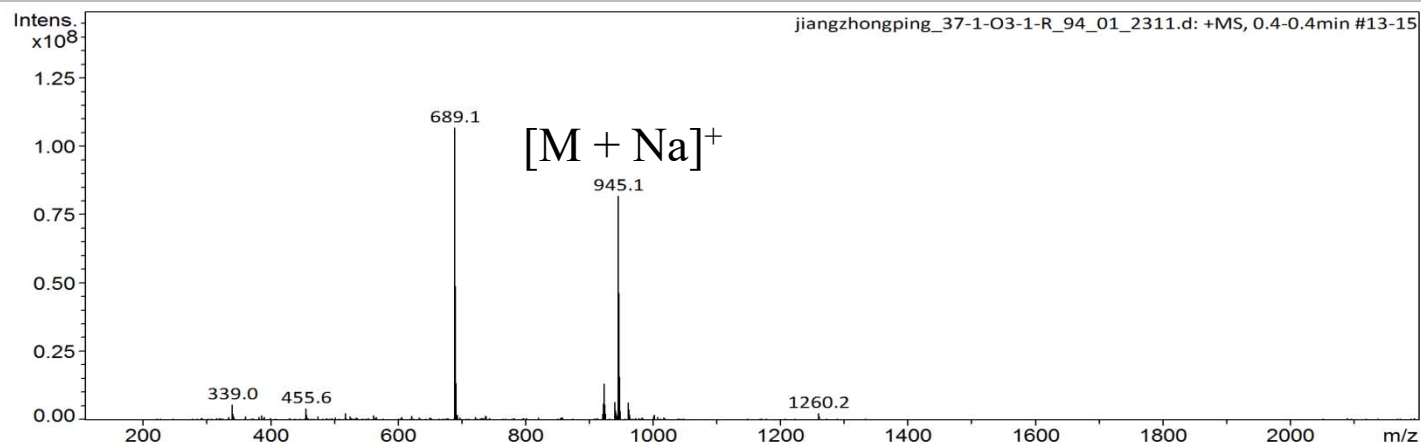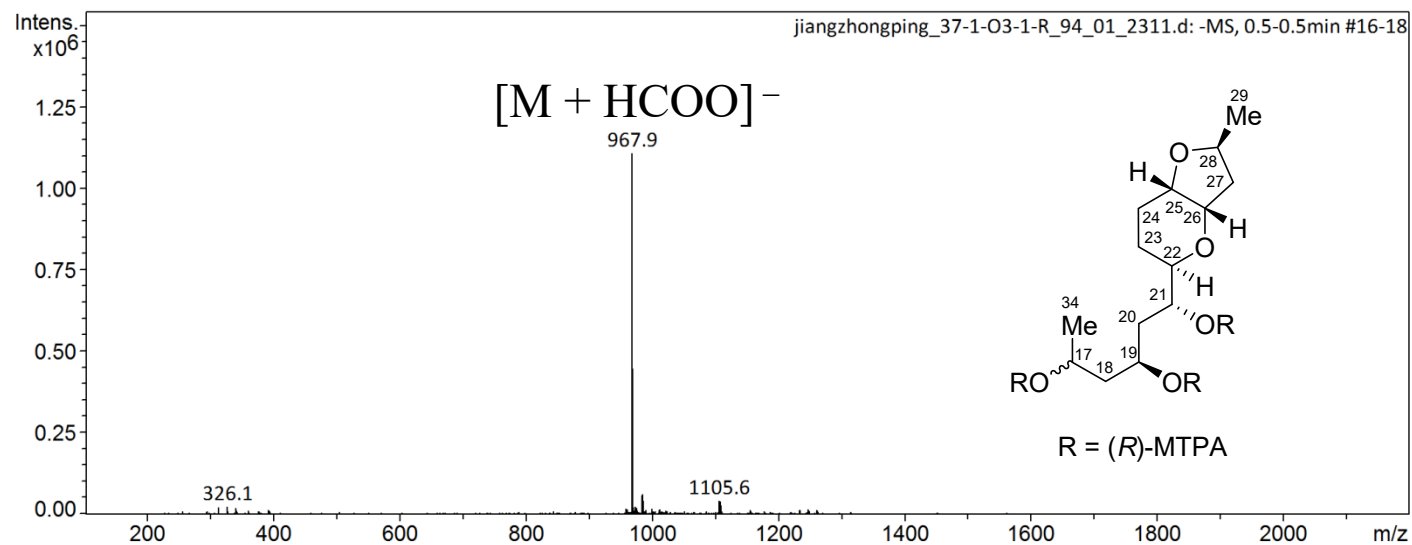



$^1\text{H}$  (600 MHz) NMR spectrum of fragments **1Br** in  $\text{CD}_3\text{OD}$

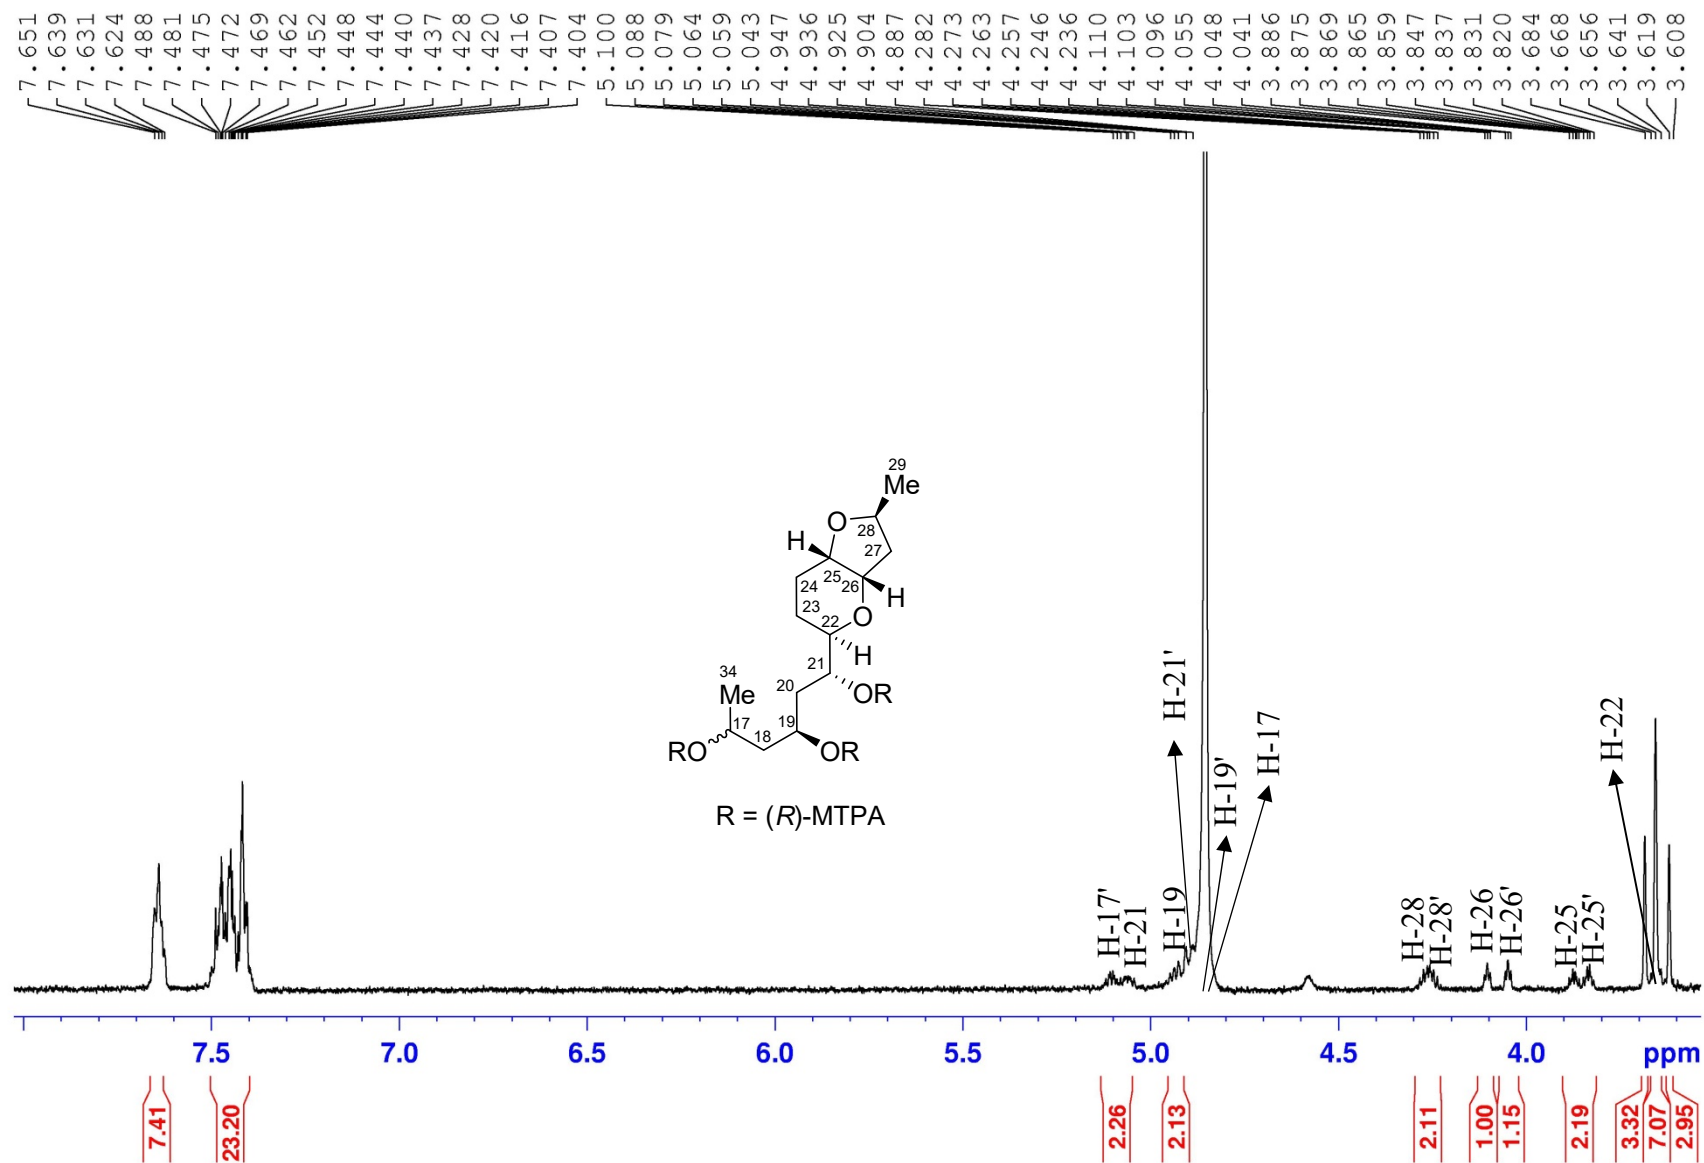

$^1\text{H}$  (600 MHz) NMR spectrum of fragments **1Br** in  $\text{CD}_3\text{OD}$

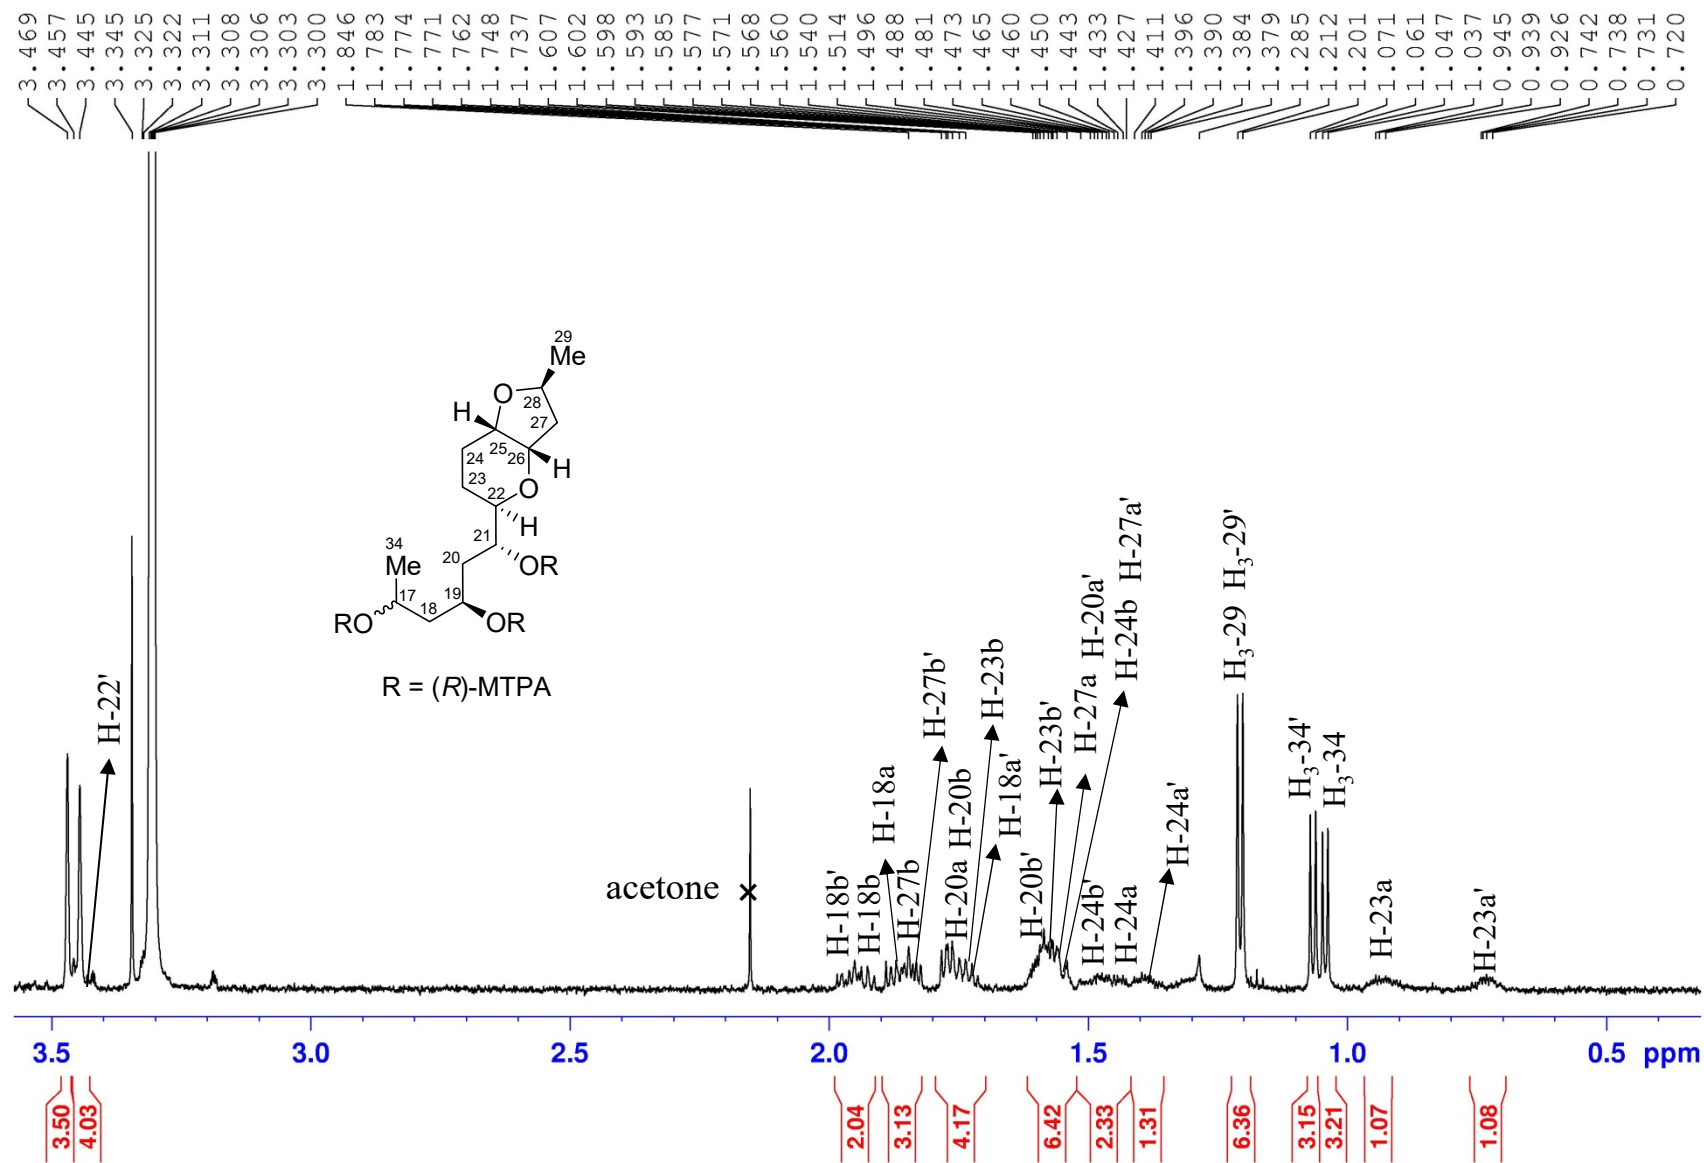

$^1\text{H}$ - $^1\text{H}$  COSY (600 MHz) spectrum of fragments **1Br** in  $\text{CD}_3\text{OD}$

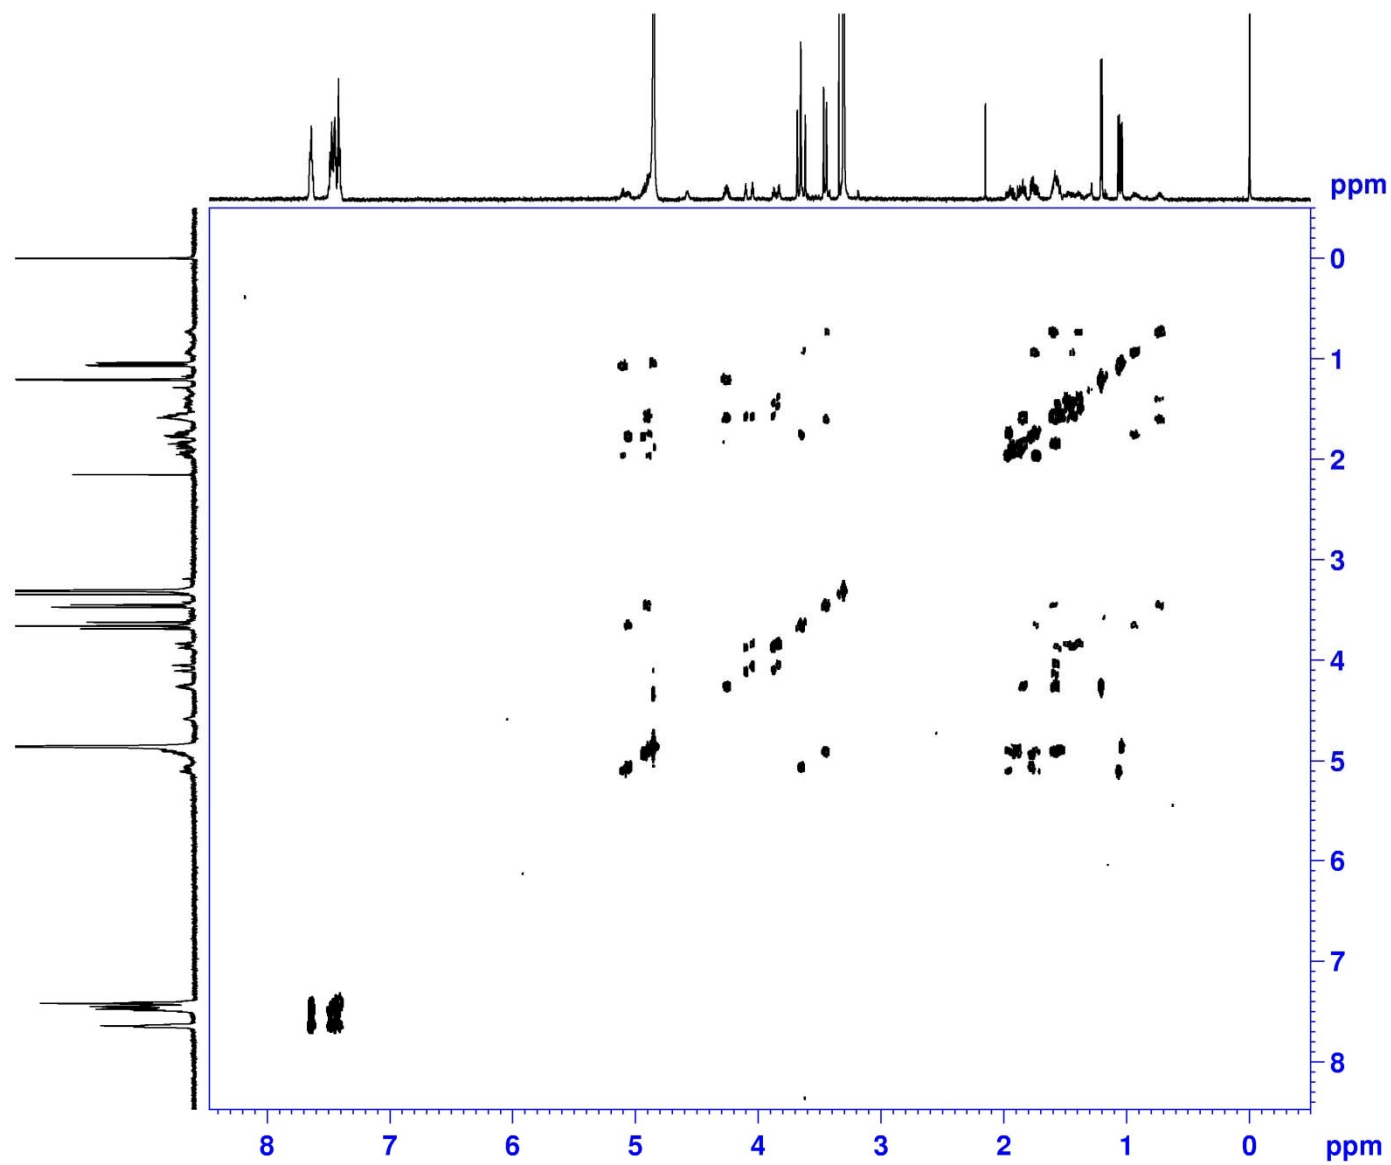

$^1\text{H}$ - $^1\text{H}$  COSY (600 MHz) spectrum of fragments **1Br** in  $\text{CD}_3\text{OD}$

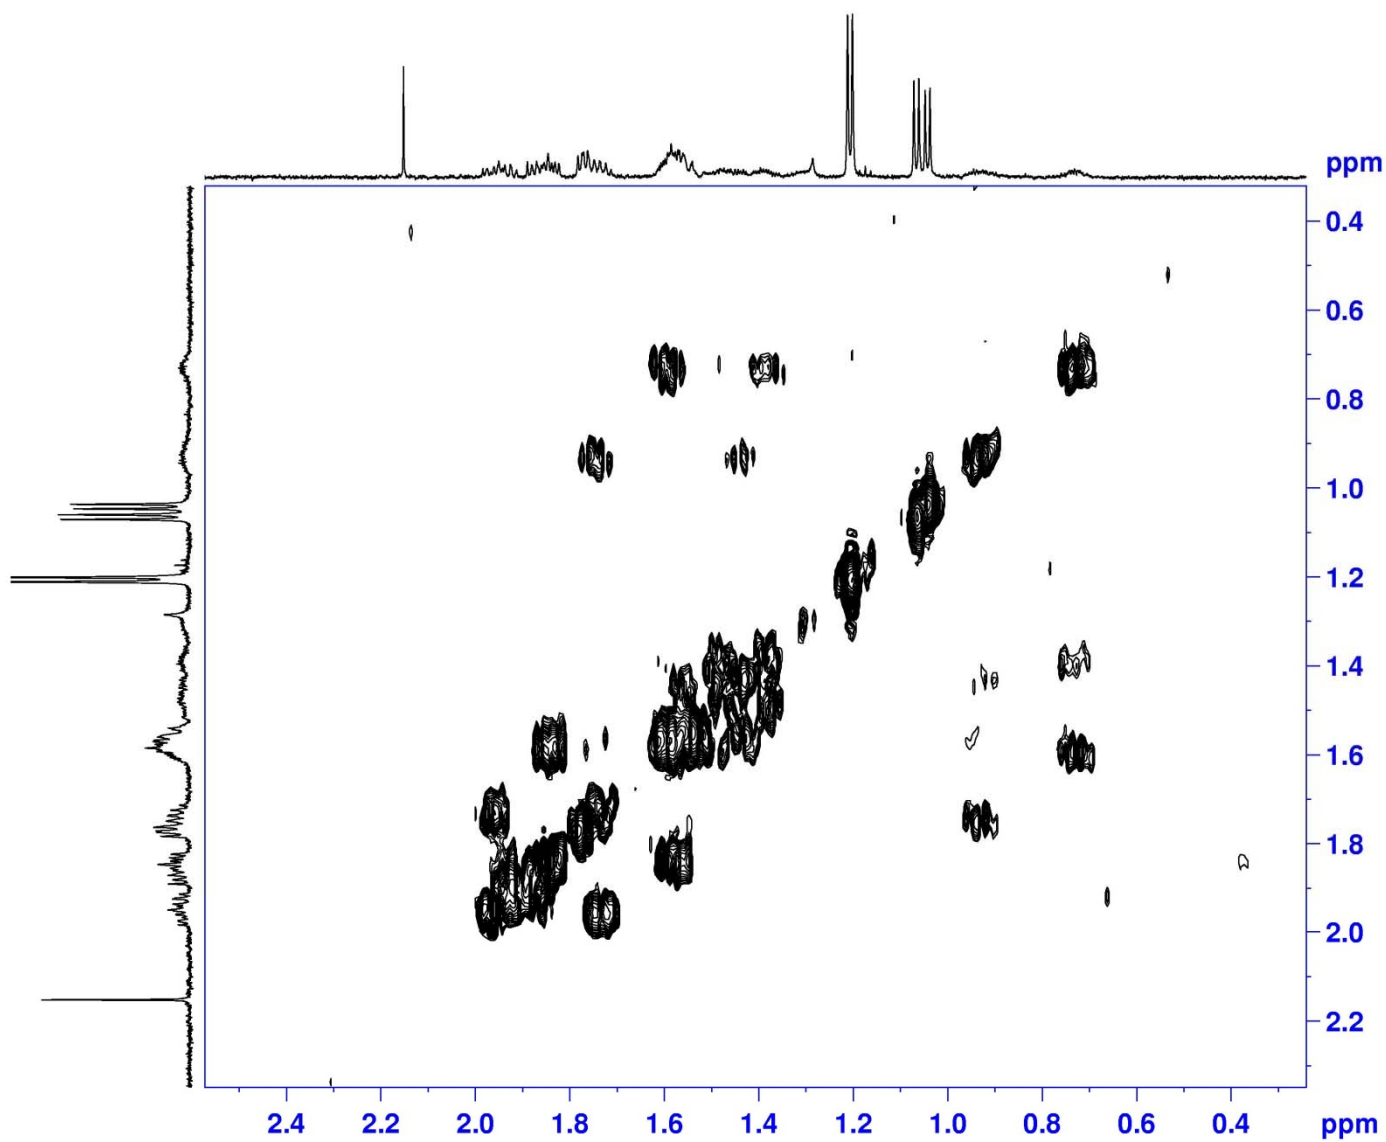

$^1\text{H}$ - $^1\text{H}$  COSY (600 MHz) spectrum of fragments **1Br** in  $\text{CD}_3\text{OD}$

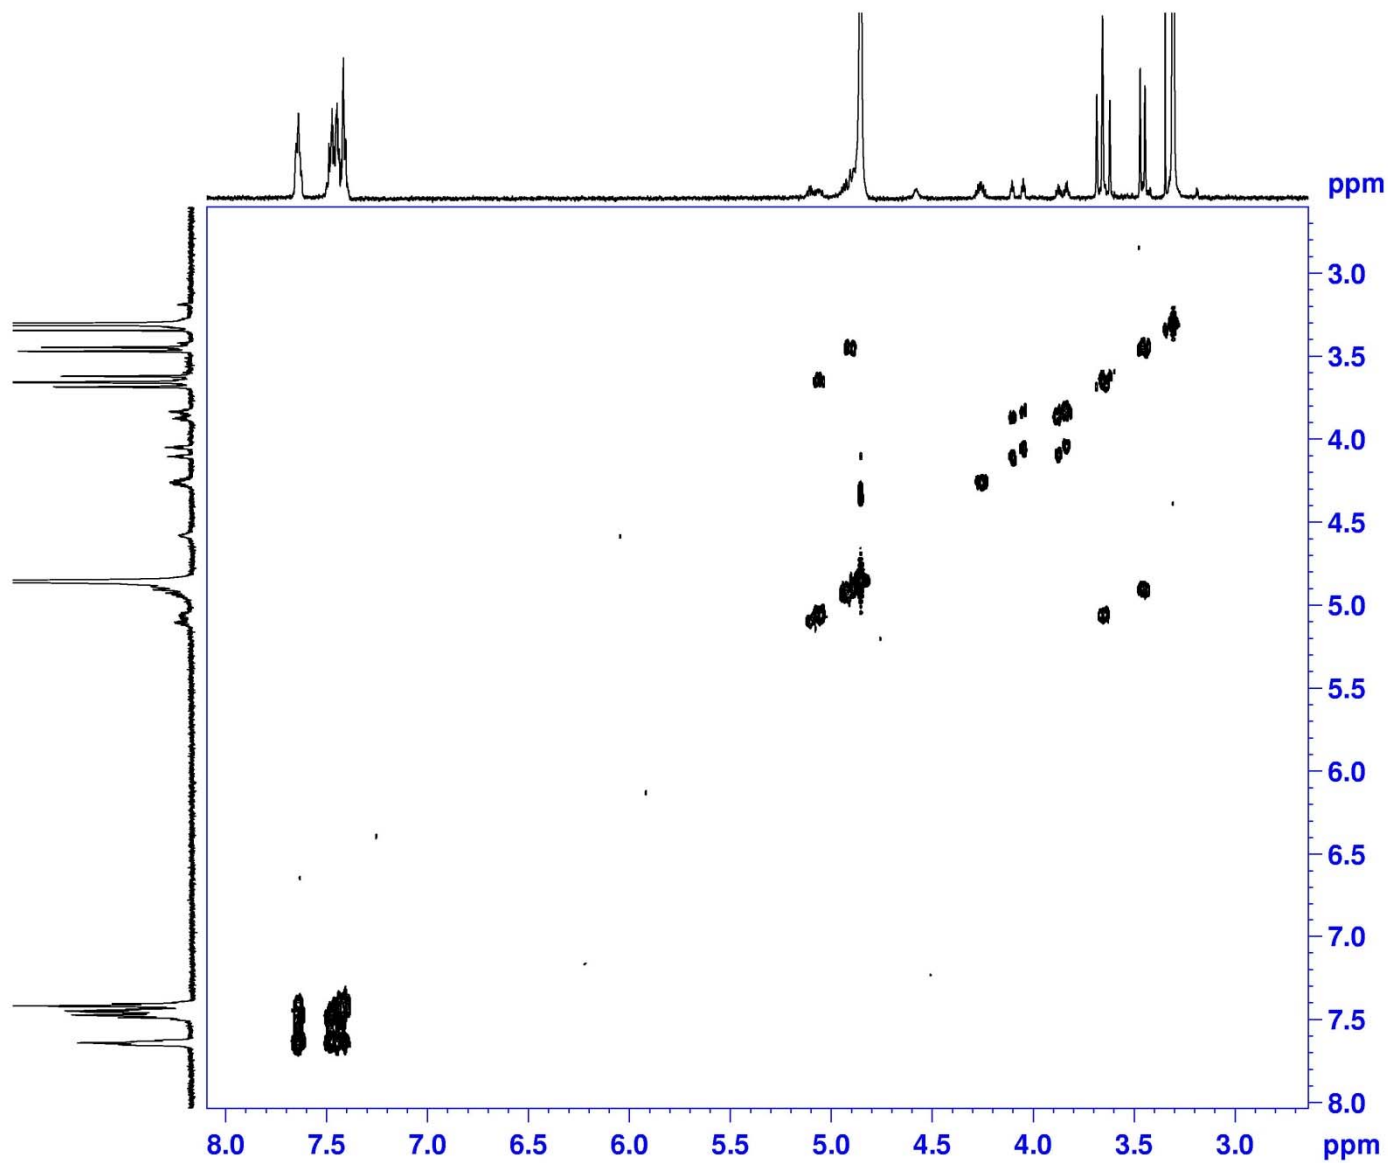

$^1\text{H}$ - $^1\text{H}$  COSY (600 MHz) spectrum of fragments **1Br** in  $\text{CD}_3\text{OD}$

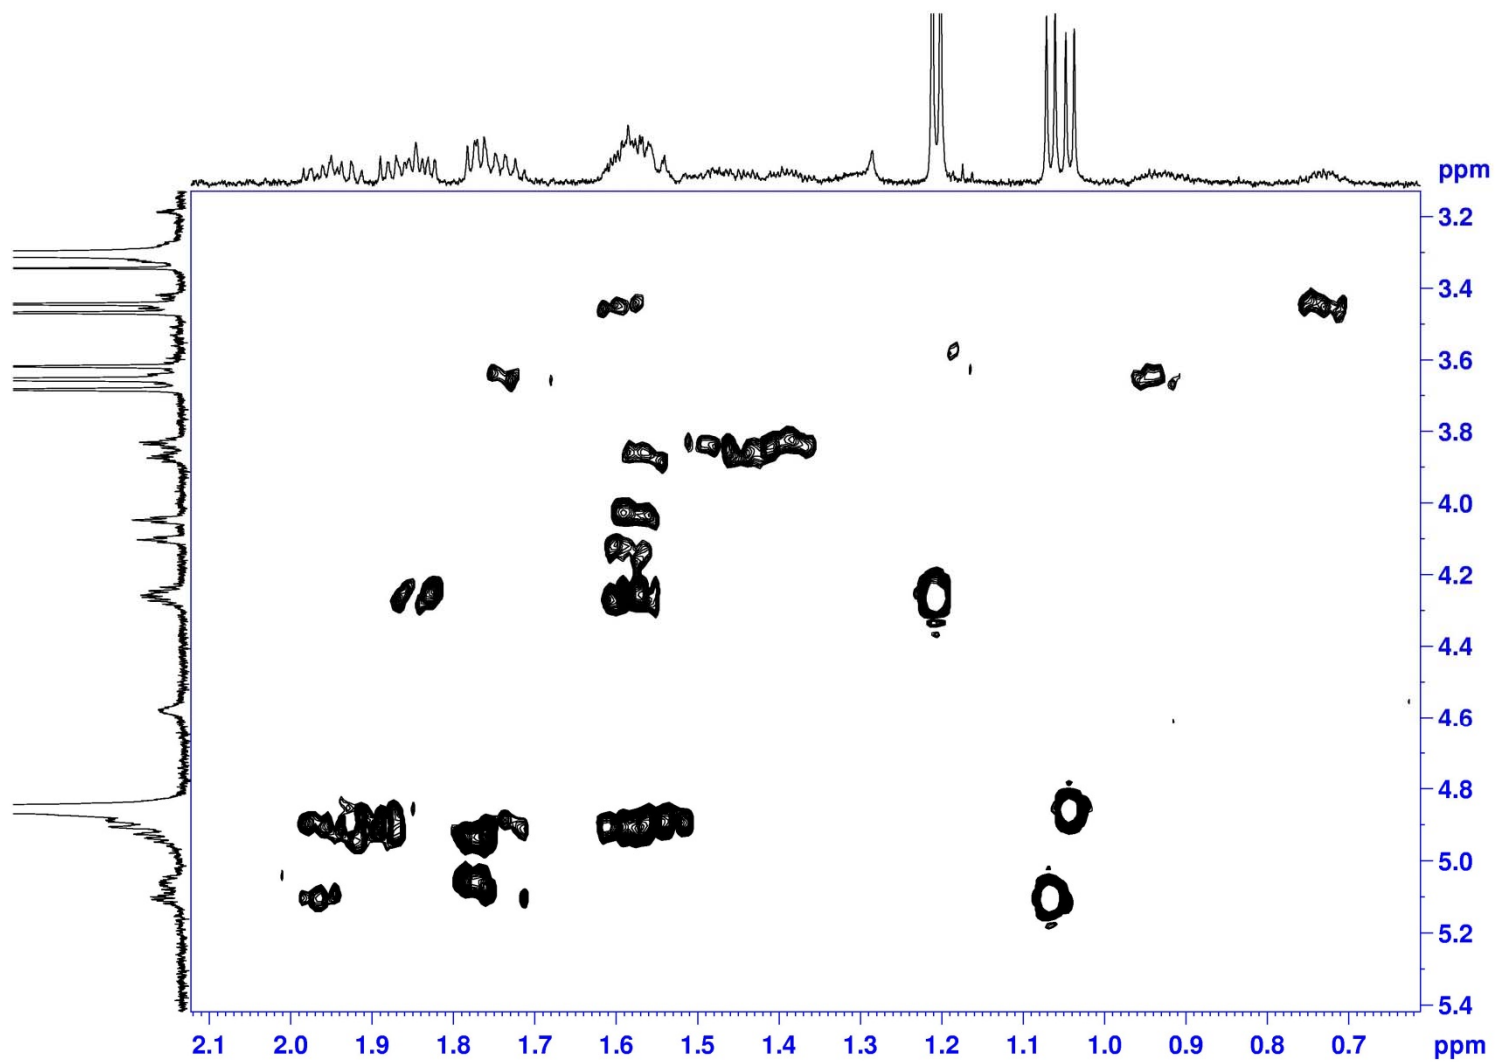



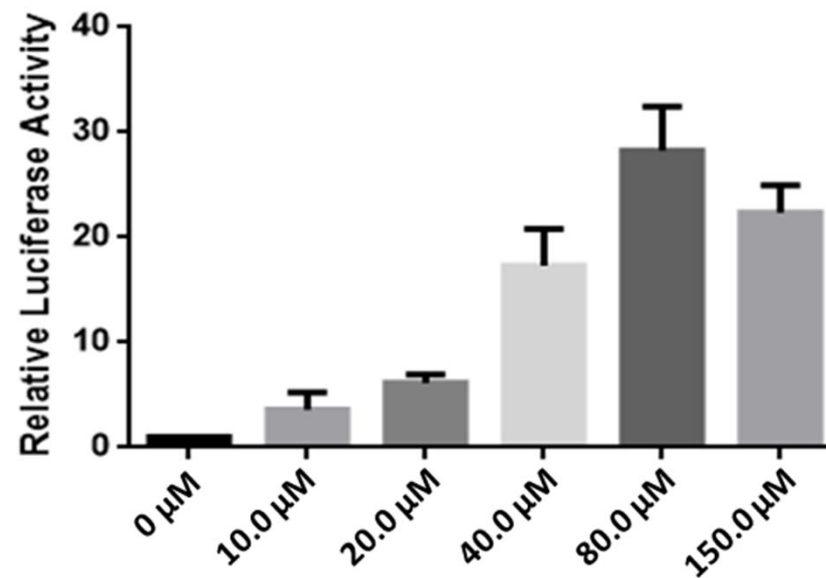

**Figure S1.** Agonistic effects of chenodeoxycholic acid (the positive control) on hFXR in HepG2 cells
